# Supplementary material for: The American Psychiatric Association Practice Guideline for the Treatment of Patients With Borderline Personality Disorder
Source: Atypon-hosted journal article supplement (doi:10.1176/appi.books.9780890428009), 2024-09-05

THE AMERICAN PSYCHIATRIC ASSOCIATION

**PRACTICE GUIDELINE**

FOR THE

**Treatment of Patients  
With Borderline  
Personality Disorder**

S E C O N D   E D I T I O N

---

**APPENDICES**

---

AMERICAN  
PSYCHIATRIC  
ASSOCIATION

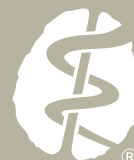

# The American Psychiatric Association Practice Guideline for the Treatment of Patients With Borderline Personality Disorder

## APPENDICES

SECOND EDITION

---

### Contents

|                                                                                          |     |
|------------------------------------------------------------------------------------------|-----|
| Appendix A: Clinical Questions . . . . .                                                 | 1   |
| Appendix B: Strategies, Selection, and Results . . . . .                                 | 3   |
| Appendix C: Research Evidence Supporting Statements . . . . .                            | 21  |
| Appendix D: Evidence for Studies Supporting Statements . . . . .                         | 93  |
| Appendix E: Risk of Bias for Studies Supporting Statements . . . . .                     | 161 |
| Appendix F: Benefits & Harms, Patient Preferences, and<br>Other Considerations . . . . . | 169 |
| Appendix G: Evidence for Additional Studies Reviewed . . . . .                           | 183 |
| Appendix H: Assessments . . . . .                                                        | 203 |
| Appendix I: Excluded Studies . . . . .                                                   | 211 |



## APPENDIX A

# Clinical Questions

The following key questions formed the basis of the systematic review:

1. In patients with borderline personality disorder, what are the efficacy, effectiveness, and risk of harms of various pharmacological and nonpharmacological therapies and different service delivery approaches?
  - a. Are there differences in efficacy, effectiveness, or risk of harms regarding different subgroups based on age, gender, race/ethnicity, or genotypes?
2. In patients with borderline personality disorder, what are the comparative efficacy, effectiveness, and risk of harms of various pharmacological and nonpharmacological therapies and different service delivery approaches?
  - a. Are there any differences in efficacy, effectiveness, or risk of harms regarding different subgroups based on age, gender, race/ethnicity, or genotypes?

Figure A–1 presents the analytic framework for our key questions.

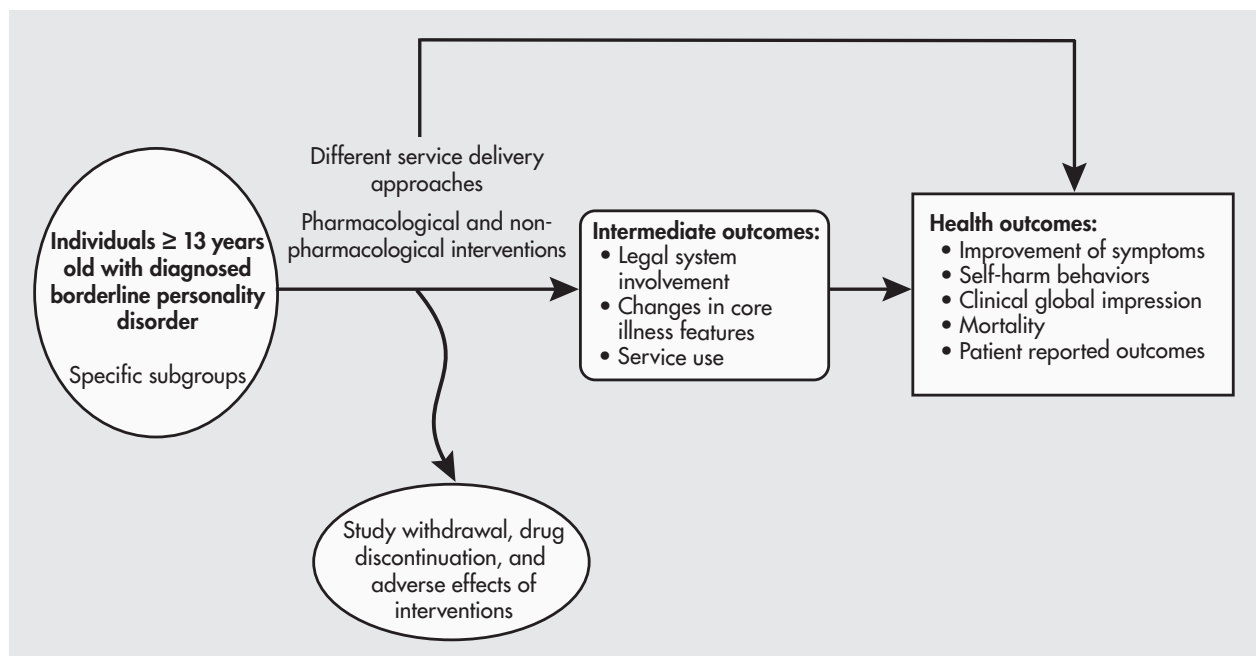

FIGURE A–1. Analytic framework.



## APPENDIX B

# Search Strategies, Study Selection, and Search Results

The methods for this systematic review follow the Agency for Healthcare Research and Quality (AHRQ) *Methods Guide for Effectiveness and Comparative Effectiveness Reviews* (available at <https://effectivehealthcare.ahrq.gov/products/collections/cer-methods-guide>) and the Preferred Reporting Items for Systematic Reviews and Meta-Analyses (PRISMA) checklist (Moher et al. 2015). The final protocol of this review was registered on PROSPERO (Registration #: CRD42020194098). All methods and analyses were determined a priori.

## Literature Searches

Initial searches were conducted on June 7, 2018, by APA staff using MEDLINE (PubMed), EMBASE, the Cochrane Library (Wiley), and PsychInfo (EBSCO). Subsequent searches were conducted by RTI. Searches differed in exact search strings; however, to ensure optimal recall, the RTI searches were reviewed in detail to ensure that the revised search strategy still detected all studies that met inclusion criteria of the original search. These searches were also conducted in MEDLINE, EMBASE, the Cochrane Library, and PsychINFO from January 1, 2018, to June 15, 2020. Additional overlapping update searches of MEDLINE and PsycINFO were run in April and September 2021. Our search strategies used a variety of terms, medical subject headings (MeSH), and major headings, and were limited to English-language and human-only studies.

To minimize retrieval bias, we manually searched reference lists of landmark studies and background articles on this topic for relevant citations that electronic searches might have missed.

# Doctor Evidence Original Search Strategy

Search Date: June 7, 2018

**TABLE B-1. PubMed search strategy for borderline personality disorder**

| Search ID# | Query                                                                                                                                                                                                                 | Results   |
|------------|-----------------------------------------------------------------------------------------------------------------------------------------------------------------------------------------------------------------------|-----------|
| #1         | ("Borderline Personality Disorder"[Mesh]) OR (borderline [tiab] AND personality [tiab])                                                                                                                               | 8,962     |
| #2         | ("animals"[MeSH Terms] OR animal [tiab] OR animals [tiab] OR rat [tiab] OR rats [tiab] OR mouse [tiab] OR mice [tiab] OR rodent [tiab] OR rodents [tiab]) NOT ("humans"[MeSH Terms] OR humans [tiab] OR human [tiab]) | 4,419,530 |
| #3         | #1 NOT #2                                                                                                                                                                                                             | 8,957     |
|            | Limit to English                                                                                                                                                                                                      | 7,983     |

**TABLE B-2. EMBASE search strategy for borderline personality disorder**

| Search | Query                                                                                                          | Results |
|--------|----------------------------------------------------------------------------------------------------------------|---------|
| #1     | exp *borderline state/ or (borderline and personality).ti. or (borderline and personality).ab.                 | 11,073  |
| #2     | limit #1 to (article or article in press or conference paper)                                                  | 7,571   |
| #3     | #2 not ((exp animal/ or nonhuman/) not exp human/)                                                             | 7,564   |
| #4     | #2 not ((animal or animals or rat or rats or mouse or mice or rodent or rodents) not (humans or human)).ti,ab. | 7,548   |
| #5     | #3 or #4                                                                                                       | 7,569   |
| #6     | limit #5 to yr="1883-2002"                                                                                     | 2,765   |
| #7     | limit #5 to yr="2002-Current"                                                                                  | 4,929   |
| #8     | remove duplicates from #6                                                                                      | 2,740   |
| #9     | remove duplicates from #7                                                                                      | 4,739   |
| #10    | #8 or #9                                                                                                       | 7,337   |
| #11    | limit #10 to English language                                                                                  | 6,356   |

**TABLE B-3. Cochrane Library search strategy for borderline personality disorder**

| Search | Query                                                                    | Results                                                  |
|--------|--------------------------------------------------------------------------|----------------------------------------------------------|
| #1     | MeSH descriptor: [Borderline Personality Disorder] explode all trees     | 390                                                      |
| #2     | borderline and personality:ti,ab,kw (Word variations have been searched) | 684                                                      |
| #3     | #1 or #2                                                                 | 684                                                      |
| #4     | #3 not (pubmed or embase):an                                             | 145 in trials; 6 in Cochrane reviews; 9 in other reviews |

**TABLE B-4. PsycINFO search strategy for borderline personality disorder**

| Search | Query                                                                                                                                                                                                                                                                                                                                                                                                                                                                | Limiters/Expanders                      | Results   |
|--------|----------------------------------------------------------------------------------------------------------------------------------------------------------------------------------------------------------------------------------------------------------------------------------------------------------------------------------------------------------------------------------------------------------------------------------------------------------------------|-----------------------------------------|-----------|
| S1     | MM "Borderline Personality Disorder"                                                                                                                                                                                                                                                                                                                                                                                                                                 |                                         | 5,220     |
| S2     | DE "Borderline Personality Disorder"                                                                                                                                                                                                                                                                                                                                                                                                                                 |                                         | 7,857     |
| S3     | MA "borderline personality disorder"                                                                                                                                                                                                                                                                                                                                                                                                                                 |                                         | 4,192     |
| S4     | TI "borderline personality" OR AB "borderline personality" OR SU "borderline personality" OR KW "borderline personality"                                                                                                                                                                                                                                                                                                                                             |                                         | 11,400    |
| S5     | S1 OR S2 OR S3 OR S4                                                                                                                                                                                                                                                                                                                                                                                                                                                 |                                         | 11,400    |
| S6     | (MM "Animals" OR DE "Animals" OR DE "Vertebrates" OR DE "Amphibia" OR DE "Birds" OR DE "Fishes" OR DE "Mammals" OR DE "Pigs" OR DE "Reptiles" OR DE "Rats" OR DE "Rodents" OR DE "Mice")                                                                                                                                                                                                                                                                             |                                         | 329,022   |
| S7     | TI "animals" OR TI "animal" OR TI "mouse" OR TI "mice" OR TI "rodent" OR TI "rodents" OR TI "rat" OR TI "rats" OR SU "animals" OR SU "animal" OR SU "mouse" OR SU "mice" OR SU "rodent" OR SU "rodents" OR SU "rat" OR SU "rats" OR KW "animals" OR KW "animal" OR KW "mouse" OR KW "mice" OR KW "rodent" OR KW "rodents" OR KW "rat" OR KW "rats" OR AB "animals" OR AB "animal" OR AB "mouse" OR AB "mice" OR AB "rodent" OR AB "rodents" OR AB "rat" OR AB "rats" |                                         | 426,155   |
| S8     |                                                                                                                                                                                                                                                                                                                                                                                                                                                                      | Limiters—Population Group: Animal       | 385,743   |
| S9     | S6 OR S7 OR S8                                                                                                                                                                                                                                                                                                                                                                                                                                                       |                                         | 459,805   |
| S10    |                                                                                                                                                                                                                                                                                                                                                                                                                                                                      | Limiters—Population Group: Human        | 3,780,890 |
| S11    | TI "humans" OR TI "human" OR AB "humans" OR AB "human" OR SU "humans" OR SU "human" OR KW "humans" OR KW "human"                                                                                                                                                                                                                                                                                                                                                     |                                         | 1,585,426 |
| S12    | S10 OR S11                                                                                                                                                                                                                                                                                                                                                                                                                                                           |                                         | 3,888,530 |
| S13    | S9 NOT S12                                                                                                                                                                                                                                                                                                                                                                                                                                                           |                                         | 310,376   |
| S14    | S5 NOT S13                                                                                                                                                                                                                                                                                                                                                                                                                                                           |                                         | 11,398    |
| S15    |                                                                                                                                                                                                                                                                                                                                                                                                                                                                      | Limiters—Publication Type: All Journals | 3,518,961 |
| S16    | S14 AND S15                                                                                                                                                                                                                                                                                                                                                                                                                                                          |                                         | 9,386     |
| S17    | LA English                                                                                                                                                                                                                                                                                                                                                                                                                                                           |                                         | 4,207,720 |
| S18    | S16 AND S17                                                                                                                                                                                                                                                                                                                                                                                                                                                          |                                         | 8,116     |



# RTI Updated Search Strategy

Search Date: June 15, 2020

**TABLE B-5. MEDLINE (PubMed) search strategy for borderline personality disorder**

| Search | Query                                                                                                                                                                                                                             | Results |
|--------|-----------------------------------------------------------------------------------------------------------------------------------------------------------------------------------------------------------------------------------|---------|
| #1     | "Borderline Personality Disorder"[Mesh] OR "Borderline Disorder"[ti] OR "Borderline Personality Disorder"[tiab] OR "borderline-patient"[ti] OR "borderline patient"[ti] OR "borderline-patients"[ti] OR "borderline patients"[ti] | 8,693   |
| #2     | #1 AND ("2018/01/01"[Date—Publication]: "3000"[Date—Publication])                                                                                                                                                                 | 1,202   |
| #3     | #2 AND English[lang]                                                                                                                                                                                                              | 1,161   |

**TABLE B-6. EMBASE search strategy for borderline personality disorder**

| Search | Query                                                                                                                                                                                                                                                  | Results |
|--------|--------------------------------------------------------------------------------------------------------------------------------------------------------------------------------------------------------------------------------------------------------|---------|
| #1     | ('borderline state' / de OR 'borderline disorder':ti OR 'borderline-patient':ti OR 'borderline patient':ti OR 'borderline-patients':ti OR 'borderline patients':ti OR 'borderline personality disorder':ti,ab,kw) AND [2018-2020]/py AND [english]/lim | 1,777   |
| #2     | 'borderline personality disorder':ti,kw AND [english]/lim AND [1-1-2018]/sd                                                                                                                                                                            | 990     |
| #3     | #1 OR #2                                                                                                                                                                                                                                               | 1,924   |

**TABLE B-7. Cochrane Library search strategy for borderline personality disorder**

| Search | Query                                                                                                                                                                                                             | Results |
|--------|-------------------------------------------------------------------------------------------------------------------------------------------------------------------------------------------------------------------|---------|
| #1     | ("Borderline Disorder" OR "Borderline Personality Disorder" OR "borderline-patient" OR "borderline patient" OR "borderline-patients" OR "borderline patients"):ti,ab,kw OR [mh "Borderline Personality Disorder"] | 851     |
| #2     | #1 with Cochrane Library publication date from Jan 2018 to present, in Cochrane Reviews, Cochrane Protocols, Trials, Clinical Answers, Editorials and Special collections                                         | 412     |

**TABLE B-8. PsycINFO (via ProQuest) search strategy for borderline personality disorder**

| Search | Query                                                                                                                                                                                                                                                                                                                                                                                                                | Results |
|--------|----------------------------------------------------------------------------------------------------------------------------------------------------------------------------------------------------------------------------------------------------------------------------------------------------------------------------------------------------------------------------------------------------------------------|---------|
| S1     | if("Borderline Personality Disorder") OR mjsub("Borderline Personality Disorder") OR mainsubject("Borderline Personality Disorder") OR ti("Borderline Personality Disorder" OR "Borderline Disorder" OR "borderline-patient" OR "borderline patient" OR "borderline-patients" OR "borderline patients") OR ab("Borderline Personality Disorder")<br>Additional limits—Date: After January 01 2018; Language: English | 986     |

Search Date: April 6, 2021

**TABLE B-9. PubMed search strategy for borderline personality disorder**

| Search | Query                                                                                                                                                                      | Results |
|--------|----------------------------------------------------------------------------------------------------------------------------------------------------------------------------|---------|
| #1     | "Borderline Personality Disorder"[Mesh] OR "Borderline Disorder*"[ti] OR "Borderline Personality Disorder*"[tiab] OR "borderline patient"[ti] OR "borderline patients"[ti] | 9,260   |
| #2     | #1 NOT ("Animals"[Mesh] NOT "Humans"[Mesh])                                                                                                                                | 9,258   |
| #3     | (#2) AND (("2020"[Date—Publication]: "3000"[Date—Publication])) Filters: English                                                                                           | 744     |

**TABLE B-10. PsycINFO (via ProQuest) search strategy for borderline personality disorder**

| Search | Query                                                           | Results |
|--------|-----------------------------------------------------------------|---------|
| S1     | DE "Borderline Personality Disorder"                            | 8,991   |
| S2     | borderline W1 (disorder# OR patient#)                           | 13,511  |
| S3     | S1 OR S2                                                        | 13,511  |
| S4     | S3 (Limiters – Publication Year 2020 – 2021; Language: English) | 510     |

Search Date: September 24, 2021

**TABLE B-11. PubMed search strategy for borderline personality disorder**

| Search | Query                                                                                                                                                                      | Results |
|--------|----------------------------------------------------------------------------------------------------------------------------------------------------------------------------|---------|
| #1     | "Borderline Personality Disorder"[Mesh] OR "Borderline Disorder*"[ti] OR "Borderline Personality Disorder*"[tiab] OR "borderline patient"[ti] OR "borderline patients"[ti] | 9,488   |
| #2     | #1 NOT ("Animals"[Mesh] NOT "Humans"[Mesh])                                                                                                                                | 9,486   |
| #3     | (#2) AND (("2020"[Date—Publication]: "3000"[Date—Publication])) Filters: English                                                                                           | 949     |

**TABLE B-12. PsycINFO (via ProQuest) search strategy for borderline personality disorder**

| Search | Query                                                           | Results |
|--------|-----------------------------------------------------------------|---------|
| S1     | DE "Borderline Personality Disorder"                            | 9,216   |
| S2     | borderline W1 (disorder# OR patient#)                           | 13,784  |
| S3     | S1 OR S2                                                        | 13,784  |
| S4     | S3 (Limiters – Publication Year 2020 – 2021; Language: English) | 749     |

# Criteria for Inclusion/Exclusion of Studies in the Review

The criteria for inclusion and exclusion of studies are designed to identify research that can answer the key questions. The criteria are based on the population, intervention/exposure, comparator, outcomes, time frames, country and clinical settings, and study design (PICOTS).

**TABLE B-13. Inclusion and exclusion criteria**

| Criteria                        | Include                                                                                          | Exclude                                                                                                                               |
|---------------------------------|--------------------------------------------------------------------------------------------------|---------------------------------------------------------------------------------------------------------------------------------------|
| Participants/<br>population     | Age ≥13                                                                                          | Age <13                                                                                                                               |
|                                 | Diagnosed with BPD as defined by DSM-IV, DSM-IV-TR, DSM-5 (Section II or Section III), or ICD-10 | Individuals with borderline traits without a specific diagnosis                                                                       |
|                                 | For mixed population studies, BPD must account for ≥75% of the total population                  | Diagnosed with BPD as defined by DSM-III-R                                                                                            |
|                                 | Subgroups of interest:                                                                           | Studies in which the primary research focus is a different diagnosis with co-occurring BPD in a subset (<75% of the total population) |
|                                 | Co-occurring mental disorder                                                                     |                                                                                                                                       |
|                                 | Age                                                                                              |                                                                                                                                       |
|                                 | Gender                                                                                           |                                                                                                                                       |
|                                 | Race/ethnicity                                                                                   |                                                                                                                                       |
|                                 | Genotypes (related to treatment selection, treatment response, or adverse effects)               |                                                                                                                                       |
| Intervention(s)/<br>exposure(s) | Yoga                                                                                             | Complementary/alternative treatments not listed for inclusion                                                                         |
|                                 | Exercise                                                                                         | Somatic therapies                                                                                                                     |
|                                 | Peer-support interventions                                                                       | Bioenergetic analysis                                                                                                                 |
|                                 | Psychosocial support                                                                             | Body psychotherapy                                                                                                                    |
|                                 | Safety planning                                                                                  | Core energetics                                                                                                                       |
|                                 | Service delivery approaches:                                                                     | Hakomi                                                                                                                                |
|                                 | Stepped-care                                                                                     | Somatic experiencing                                                                                                                  |
|                                 | Collaborative care                                                                               | Pharmacotherapies                                                                                                                     |
|                                 | Measurement-based care                                                                           | Acetazolamide                                                                                                                         |
|                                 | Treatment setting comparisons                                                                    | Ethosuximide                                                                                                                          |
|                                 | Face-to-face sessions                                                                            | Felbamate                                                                                                                             |
|                                 | Group sessions                                                                                   | Fosphenytoin                                                                                                                          |
|                                 | Online programs                                                                                  | Lacosamide                                                                                                                            |
|                                 | Therapeutic community                                                                            | Methsuximide                                                                                                                          |
|                                 | Video                                                                                            | Pentobarbital                                                                                                                         |
|                                 | Progressive muscle relaxation                                                                    | Perampanel                                                                                                                            |
|                                 | Somatic therapies:                                                                               | Primidone                                                                                                                             |
|                                 | Electroconvulsive therapy (ECT)                                                                  | Rufinamide                                                                                                                            |

**TABLE B-13. Inclusion and exclusion criteria (continued)**

| Criteria | Include                                             | Exclude      |
|----------|-----------------------------------------------------|--------------|
|          | Repetitive transcranial magnetic stimulation (rTMS) | Droperidol   |
|          | Transcranial alternating current stimulation (tACS) | Nalmefene    |
|          | Transcranial direct current stimulation (tDCS)      | Butabarbital |
|          | Transcranial magnetic stimulation (TMS)             | Secobarbital |
|          | Pharmacotherapies                                   |              |
|          | Anticonvulsant "mood stabilizers":                  |              |
|          | Carbamazepine                                       |              |
|          | Divalproex sodium                                   |              |
|          | Gabapentin                                          |              |
|          | Lamotrigine                                         |              |
|          | Levetiracetam                                       |              |
|          | Oxcarbazepine                                       |              |
|          | Phenytoin                                           |              |
|          | Pregabalin                                          |              |
|          | Tiagabine                                           |              |
|          | Topiramate                                          |              |
|          | Valproate                                           |              |
|          | Valproic acid                                       |              |
|          | Vigabatrin                                          |              |
|          | Zonisamide                                          |              |
|          | Antidepressants:                                    |              |
|          | Amitriptyline                                       |              |
|          | Amoxapine                                           |              |
|          | Bupropion                                           |              |
|          | Citalopram                                          |              |
|          | Clomipramine                                        |              |
|          | Desipramine                                         |              |
|          | Desvenlafaxine                                      |              |
|          | Doxepin                                             |              |
|          | Duloxetine                                          |              |
|          | Escitalopram                                        |              |
|          | Fluoxetine                                          |              |
|          | Fluvoxamine                                         |              |
|          | Imipramine                                          |              |
|          | Isocarboxazid                                       |              |
|          | Maprotiline                                         |              |
|          | Mirtazapine                                         |              |

**TABLE B-13. Inclusion and exclusion criteria (continued)**

| Criteria | Include          | Exclude |
|----------|------------------|---------|
|          | Milnacipran      |         |
|          | Nefazodone       |         |
|          | Nortriptyline    |         |
|          | Paroxetine       |         |
|          | Phenelzine       |         |
|          | Protriptyline    |         |
|          | Sertraline       |         |
|          | Selegiline       |         |
|          | Tranlycypromine  |         |
|          | Trazodone        |         |
|          | Trimipramine     |         |
|          | Venlafaxine      |         |
|          | Vilazodone       |         |
|          | Vortioxetine     |         |
|          | Antipsychotics:  |         |
|          | Aripiprazole     |         |
|          | Asenapine        |         |
|          | Chlorpromazine   |         |
|          | Clozapine        |         |
|          | Fluphenazine     |         |
|          | Haloperidol      |         |
|          | Iloperidone      |         |
|          | Loxapine         |         |
|          | Lurasidone       |         |
|          | Olanzapine       |         |
|          | Paliperidone     |         |
|          | Perphenazine     |         |
|          | Pimozide         |         |
|          | Prochlorperazine |         |
|          | Quetiapine       |         |
|          | Risperidone      |         |
|          | Thioridazine     |         |
|          | Thiothixene      |         |
|          | Trifluoperazine  |         |
|          | Ziprasidone      |         |
|          | Benzodiazepines: |         |
|          | Alprazolam       |         |
|          | Clobazam         |         |

**TABLE B-13. Inclusion and exclusion criteria (continued)**

| Criteria | Include                                 | Exclude |
|----------|-----------------------------------------|---------|
|          | Clonazepam                              |         |
|          | Clorazepate                             |         |
|          | Chlordiazepoxide                        |         |
|          | Diazepam                                |         |
|          | Estazolam                               |         |
|          | Flurazepam                              |         |
|          | Lorazepam                               |         |
|          | Midazolam                               |         |
|          | Oxazepam                                |         |
|          | Quazepam                                |         |
|          | Temazepam                               |         |
|          | Triazolam                               |         |
|          | Opioid agonists and antagonists:        |         |
|          | Buprenorphine                           |         |
|          | Naloxone                                |         |
|          | Naltrexone                              |         |
|          | Sedative-hypnotic medications:          |         |
|          | Eszopiclone                             |         |
|          | Melatonin                               |         |
|          | Ramelteon                               |         |
|          | Suvorexant                              |         |
|          | Tasimelteon                             |         |
|          | Zaleplon                                |         |
|          | Zolpidem                                |         |
|          | Other pharmacotherapies:                |         |
|          | Clonidine                               |         |
|          | Lithium                                 |         |
|          | Prazosin                                |         |
|          | Psychotherapies:                        |         |
|          | Acceptance and commitment therapy (ACT) |         |
|          | Client-centered therapy                 |         |
|          | Cognitive analytic therapy (CAT)        |         |
|          | Cognitive-behavioral therapy (CBT)      |         |
|          | Cognitive rehabilitation                |         |
|          | Cognitive therapy (CT)                  |         |
|          | Comprehensive validation therapy        |         |
|          | Dialectical behavior therapy (DBT)      |         |
|          | Dual-focused schema therapy             |         |

**TABLE B-13. Inclusion and exclusion criteria (continued)**

| Criteria                  | Include                                                                    | Exclude                                                            |
|---------------------------|----------------------------------------------------------------------------|--------------------------------------------------------------------|
|                           | Dynamic deconstructive psychotherapy (DDP)                                 |                                                                    |
|                           | Emotion regulation group intervention                                      |                                                                    |
|                           | Emotion regulation training (ERT)                                          |                                                                    |
|                           | Good psychiatric management (GPM)                                          |                                                                    |
|                           | Group analytic psychotherapy                                               |                                                                    |
|                           | Humanistic and integrative psychotherapy                                   |                                                                    |
|                           | Individual psychotherapy                                                   |                                                                    |
|                           | Interpersonal group psychotherapy                                          |                                                                    |
|                           | Interpersonal psychotherapy (IPP)                                          |                                                                    |
|                           | Interpersonal therapy (IPT)                                                |                                                                    |
|                           | Manual-assisted cognitive therapy (MACT)                                   |                                                                    |
|                           | Mentalization-based therapy (MBT)                                          |                                                                    |
|                           | Mindfulness-based cognitive therapy (MBCT)                                 |                                                                    |
|                           | Motive-oriented therapeutic relationship (MOTR)                            |                                                                    |
|                           | Nidotherapy                                                                |                                                                    |
|                           | Problem-solving therapy                                                    |                                                                    |
|                           | Psychoanalytic therapy (psychoanalysis)                                    |                                                                    |
|                           | Psychodynamic interpersonal therapy (PIT)                                  |                                                                    |
|                           | Psychodynamic therapy                                                      |                                                                    |
|                           | Psychodynamic/psychoanalytic psychotherapy                                 |                                                                    |
|                           | Psychoeducation                                                            |                                                                    |
|                           | Psychotherapy focused on psychic representation                            |                                                                    |
|                           | Rogerian supportive therapy                                                |                                                                    |
|                           | Schema-focused cognitive therapy                                           |                                                                    |
|                           | Schema-focused therapy                                                     |                                                                    |
|                           | Schema-focused psychotherapy (SFP)                                         |                                                                    |
|                           | Sequential brief Adlerian psychodynamic psychotherapy                      |                                                                    |
|                           | Supervised team management                                                 |                                                                    |
|                           | Supportive therapy                                                         |                                                                    |
|                           | System-based psychotherapy                                                 |                                                                    |
|                           | Systemic therapy                                                           |                                                                    |
|                           | Systems Training for Emotional Predictability and Problem Solving (STEPPS) |                                                                    |
|                           | Transference-focused psychotherapy (TFP)                                   |                                                                    |
| Comparator(s)/<br>control | Interventions listed above for inclusion                                   | Interventions listed as excluded above for interventions/exposures |

**TABLE B-13. Inclusion and exclusion criteria (continued)**

| Criteria | Include                                                                                                                                      | Exclude                                                                           |
|----------|----------------------------------------------------------------------------------------------------------------------------------------------|-----------------------------------------------------------------------------------|
|          | Placebo                                                                                                                                      |                                                                                   |
|          | Treatment as usual                                                                                                                           |                                                                                   |
|          | Wait-list control                                                                                                                            |                                                                                   |
|          | Community treatment by experts                                                                                                               |                                                                                   |
|          | General psychiatric management                                                                                                               |                                                                                   |
|          | Standard group treatment                                                                                                                     |                                                                                   |
|          | Standard psychiatric care                                                                                                                    |                                                                                   |
|          | Structured clinical management                                                                                                               |                                                                                   |
| Outcomes | Pre-specified outcomes and outcome measures                                                                                                  | Outcomes not listed, imaging markers, physiological markers, and biomarkers       |
|          | A. BPD symptoms/diagnostic criteria                                                                                                          | Outcomes that were not pre-specified, e.g., during post-hoc, exploratory analyses |
|          | 1. Frantic efforts to avoid real or imaginary abandonment                                                                                    |                                                                                   |
|          | 2. Pattern of unstable and intense interpersonal relationships characterized by alternating between extremes of idealization and devaluation |                                                                                   |
|          | a. Inventory of Interpersonal Problems (IIP)                                                                                                 |                                                                                   |
|          | b. Distorted self-image                                                                                                                      |                                                                                   |
|          | 3. Identity disturbances: markedly and persistent unstable self-image or sense of self                                                       |                                                                                   |
|          | a. Distorted self-image                                                                                                                      |                                                                                   |
|          | 4. Impulsivity                                                                                                                               |                                                                                   |
|          | a. Impulsivity                                                                                                                               |                                                                                   |
|          | b. Impulsive/behavioral                                                                                                                      |                                                                                   |
|          | c. Risk taking behaviors                                                                                                                     |                                                                                   |
|          | d. Lack of restraint                                                                                                                         |                                                                                   |
|          | e. Barratt Impulsiveness Scale (BIS-11)                                                                                                      |                                                                                   |
|          | f. Multi-Impulsivity Scale (MIS)                                                                                                             |                                                                                   |
|          | 5. Recurrent suicidal behavior, gestures, or threats; or self-mutilating behavior                                                            |                                                                                   |
|          | a. Nonsuicidal self-injury                                                                                                                   |                                                                                   |
|          | b. Suicide attempts                                                                                                                          |                                                                                   |
|          | c. Suicide                                                                                                                                   |                                                                                   |
|          | d. Suicidal ideation                                                                                                                         |                                                                                   |
|          | e. Self-destructive behavior                                                                                                                 |                                                                                   |
|          | f. Beck Scale for Suicide Ideation (BSS)                                                                                                     |                                                                                   |
|          | g. Self-Harm Behavior Survey                                                                                                                 |                                                                                   |
|          | h. Suicidal Behaviors Questionnaire (SBQ) and SBQ-R                                                                                          |                                                                                   |



**TABLE B-13. Inclusion and exclusion criteria (continued)**

| Criteria | Include                                                                                           | Exclude |
|----------|---------------------------------------------------------------------------------------------------|---------|
|          | i. Parasuicide History Interview (PHI)                                                            |         |
|          | j. Borderline Personality Disorder Severity Index (BPDSI) Parasuicidality Subscale                |         |
|          | k. Columbia Suicide Severity Rating Scale (C-SSRS)                                                |         |
|          | l. Deliberate Self-Harm Inventory (DSHI)                                                          |         |
|          | m. Self-Injurious Thoughts and Behaviors Interview-Self-Report                                    |         |
|          | 6. Affective instability, due to a marked reactivity of mood                                      |         |
|          | a. Irritability                                                                                   |         |
|          | b. Mood swings                                                                                    |         |
|          | c. Difficulties in Emotion Regulation Scale (DERS)                                                |         |
|          | d. Affective dysregulation                                                                        |         |
|          | 7. Chronic feelings of emptiness                                                                  |         |
|          | 8. Inappropriate intense anger or difficulty controlling anger                                    |         |
|          | a. Aggression                                                                                     |         |
|          | b. Anger                                                                                          |         |
|          | c. Hostility                                                                                      |         |
|          | d. Aggressive behavior                                                                            |         |
|          | e. Antisocial behavior                                                                            |         |
|          | f. Spielberger State-Trait Anger Expression Inventory (STAXI)                                     |         |
|          | g. Spielberger State-Trait Anger Scale (STAS)                                                     |         |
|          | h. Acting Out Scale (AOS)                                                                         |         |
|          | i. Aggression Questionnaire (AQ)                                                                  |         |
|          | j. Anger, Irritability, and Assault Questionnaire (AIAQ)                                          |         |
|          | k. Overt Aggression Scale (OAS)                                                                   |         |
|          | l. Buss Durkee Hostility Inventory (BDHI)                                                         |         |
|          | 9. Transient, stress-related paranoid ideation, or severe dissociative symptoms                   |         |
|          | a. Dissociation                                                                                   |         |
|          | B. Scales for BPD                                                                                 |         |
|          | 1. Borderline Personality Disorder Severity Index (BPDSI)                                         |         |
|          | 2. Zanarini Rating Scale (ZAN-BPD)                                                                |         |
|          | C. Other symptoms commonly found in individuals with BPD, but not part of the diagnostic criteria |         |

**TABLE B-13. Inclusion and exclusion criteria (continued)**

| Criteria | Include                                                                    | Exclude |
|----------|----------------------------------------------------------------------------|---------|
|          | 1. Depression and Anxiety                                                  |         |
|          | a. Spielberger State-Trait Anxiety Inventory (STAI)                        |         |
|          | b. Symptom Checklist-90 (SCL-90)                                           |         |
|          | c. Beck Anxiety Inventory (BAI)                                            |         |
|          | d. Beck Depression Inventory (BDI)                                         |         |
|          | e. Beck Hopelessness Scale (BHS)                                           |         |
|          | f. Hamilton Rating Scale for Anxiety (Ham-A)                               |         |
|          | g. Hamilton Rating Scale for Depression (Ham-D)                            |         |
|          | h. Hospital Anxiety and Depression Scale (HADS)                            |         |
|          | i. Montgomery-Åsberg Depression Rating Scale (MADRS)                       |         |
|          | j. Patient Health Questionnaire (PHQ-9)                                    |         |
|          | k. Brief Symptom Inventory (BSI)                                           |         |
|          | l. Generalized Anxiety Disorder 7-item scale (GAD-7)                       |         |
|          | m. Patient Health Questionnaire–Adolescent                                 |         |
|          | n. Patient Health Questionnaire: Somatic, Anxiety, and Depressive Symptoms |         |
|          | D. Functioning Scales                                                      |         |
|          | 1. Global Adjustment Scale                                                 |         |
|          | 2. Global Assessment of Functioning (GAF)                                  |         |
|          | 3. Quality of Life                                                         |         |
|          | 4. Global Social Adjustment (GSA)                                          |         |
|          | 5. Global Severity Index (GSI)                                             |         |
|          | 6. Number of years with employment                                         |         |
|          | 7. Social Adjustment Scale (SAS)                                           |         |
|          | 8. Social and Occupational Functioning Assessment Scale                    |         |
|          | 9. Social Functioning Questionnaire (SFQ)                                  |         |
|          | 10. Social History Interview (SHI)                                         |         |
|          | 11. Social Problem-Solving Inventory                                       |         |
|          | 12. World Health Organization—Disability Assessment Schedule (WHO-DAS)     |         |
|          | E. Adverse events (AEs)                                                    |         |
|          | 1. Rate of any AEs                                                         |         |
|          | 2. Overall serious treatment-related AE rate                               |         |
|          | 3. Specific serious treatment-related AEs                                  |         |

**TABLE B-13. Inclusion and exclusion criteria (continued)**

| Criteria        | Include                                            | Exclude                                                           |
|-----------------|----------------------------------------------------|-------------------------------------------------------------------|
|                 | 4. Study withdrawal due to AE                      |                                                                   |
|                 | 5. Study withdrawal for any reason                 |                                                                   |
| Timing          | Treatment duration ≥8 weeks                        | Treatment duration <8 weeks                                       |
| Setting/context | Very high Human Development Index (HDI) countries* | All other countries                                               |
| Study design    | RCTs phase 2   3   4                               | Single-arm dose-finding trials                                    |
|                 | Nonrandomized clinical trials (N≥50):              | Observational, noncomparative                                     |
|                 | Phase 1   2   3   4                                | Case reports/series                                               |
|                 | Observational studies, comparative (N≥50)          | Prognostic course/factor studies                                  |
|                 | Cross-sectional                                    | Modeling studies                                                  |
|                 | Prospective cohort                                 | Pre-clinical                                                      |
|                 | Retrospective cohort                               | Narrative reviews                                                 |
|                 | Nonconcurrent cohort                               | Systematic reviews/meta-analyses (will be used for hand searches) |
|                 | Case-control                                       |                                                                   |
|                 | Pooled analyses of controlled studies              |                                                                   |

BPD=borderline personality disorder; KQ=key question; N=sample size; NA=not applicable; RCT=randomized controlled trial.

\*Very high HDI countries: Andorra, Argentina, Australia, Austria, Bahamas, Bahrain, Barbados, Belarus, Belgium, Brunei Darussalam, Bulgaria, Canada, Chile, Croatia, Cyprus, Czechia, Denmark, Estonia, Finland, France, Germany, Greece, Hong Kong, China (SAR), Hungary, Iceland, Ireland, Israel, Italy, Japan, Kazakhstan, Korea (Republic of), Kuwait, Latvia, Liechtenstein, Lithuania, Luxembourg, Malaysia, Malta, Montenegro, Netherlands, New Zealand, Norway, Oman, Poland, Portugal, Qatar, Romania, Russian Federation, Saudi Arabia, Singapore, Slovakia, Slovenia, Spain, Sweden, Switzerland, Taiwan\*\*, United Arab Emirates, United Kingdom, United States, Uruguay.

\*\*The United Nations does not recognize Taiwan (i.e., Republic of China) as a sovereign state and does not include it in the HDI report. However, Taiwan’s government calculated its HDI to be 0.885, based on 2014 data and using the same methodology as the United Nations. This HDI value would place Taiwan among countries in the “very high” human development category and will be included in this report.

## Literature Review, Data Abstraction, and Data Management

To ensure accuracy, two reviewers independently reviewed all titles, abstracts, and full-text articles. We used Distiller SR, an online tool to conduct systematic reviews, to screen the literature (DistillerSR, Evidence Partners, Ottawa, Canada). We resolved discrepancies by consensus or by involving a third, senior reviewer.

All results at both title/abstract and full-text review stages were tracked in an EndNote® bibliographic database (Thomson Reuters, New York, NY). Appendix I presents the list of studies excluded (with reasons) at the full-text level.

We designed, pilot tested, and used a structured data abstraction form in DistillerSR to ensure consistency of data abstraction. We abstracted data into categories that included (but were not limited to) the following: study design, eligibility criteria, intervention, methods of outcome assessment, population characteristics, sample size, attrition, results, and adverse event incidence. A second team member verified abstracted study data for accuracy and completeness.

## Assessment of Risk of Bias of Individual Studies

To assess the risk of bias of studies, we used the Risk Of Bias In Non-randomised Studies of Interventions (ROBINS-I) (Sterne et al. 2016) for nonrandomized controlled studies, and for randomized controlled trials (RCTs), we used the Cochrane Risk of Bias 2 tool. Two independent reviewers assessed the risk of bias at the study level and also considered rating bias at an outcome level if methodological limitations might affect different outcomes in a different way (e.g., lack of blinding might increase the risk of bias for quality of life but not for overall mortality). We assigned a “high risk of bias” rating to studies that had very serious limitations in design or conduct that might invalidate findings regarding all or individual outcomes. Disagreements between the two reviewers were resolved by discussion and consensus or by consulting a third member of the team. Risk of bias diagrams were generated using the Risk-Of-Bias VISualization (robvis) tool (McGuinness and Higgins 2021; see Appendix E).

## Data Synthesis

We summarized all included studies in narrative form and in summary tables that tabulate the important features of the study populations, design, intervention, outcomes, setting, country, and results. If we found three or more similar studies addressing an outcome of interest, we considered quantitative analysis (i.e., meta-analysis) if studies were similar (in population, interventions, comparators, and outcomes). For all analyses, we used random-effects models (restricted maximum likelihood random effects) to estimate pooled effects. To determine whether quantitative analyses were appropriate, we assessed the clinical and methodological heterogeneity of the studies under consideration following established guidance (Gartlehner et al. 2012). If we conducted meta-analyses, we assessed statistical heterogeneity in effects between studies by calculating the chi-squared statistic and the  $I^2$  statistic (the proportion of variation in study estimates attributable to heterogeneity). We examined potential sources of heterogeneity using sensitivity analyses. When quantitative analyses were not appropriate (e.g., due to heterogeneity, insufficient numbers of similar studies, or insufficiency or variation in outcome reporting), we synthesized the data qualitatively.

## Grading the Certainty of Evidence for Major Comparisons and Outcomes

We graded the certainty of evidence of relevant outcomes based on current Grading of Recommendations Assessment, Development and Evaluation (GRADE) guidance (Balslem et al. 2011). Developed to grade the overall certainty of a body of evidence, this approach incorporates five key domains: 1) risk of bias, 2) inconsistency, 3) indirectness, 4) imprecision of the evidence, and 5) reporting bias. It also considers other optional domains that may be relevant for some scenarios. These included plausible confounding that would decrease the observed effect and strength of association (i.e., magnitude of effect) or factors that would increase the strength of association (i.e., dose-response effect). Two reviewers assessed each domain for each selected outcome and resolved differences by consensus discussion. We documented all decisions regarding up- or down-grading the certainty of evidence to ensure transparency. We used GradePro to develop summary of findings tables for the guideline panel.

Table B–14 describes the grades of certainty of evidence, which reflect the certainty of the body of evidence regarding a specific outcome.

**TABLE B-14. Definitions of the grades of certainty of evidence**

| <b>Grade</b> | <b>Definition</b>                                                                                                                                                                                                                                                                                                                         |
|--------------|-------------------------------------------------------------------------------------------------------------------------------------------------------------------------------------------------------------------------------------------------------------------------------------------------------------------------------------------|
| High         | We are very confident that the estimate of effect lies close to the true effect for this outcome. The body of evidence has few or no deficiencies. We believe that the findings are stable (i.e., another study would not change the conclusions).                                                                                        |
| Moderate     | We are moderately confident that the estimate of effect lies close to the true effect for this outcome. The body of evidence has some deficiencies. We believe that the findings are likely to be stable, but some doubt remains.                                                                                                         |
| Low          | We have limited confidence that the estimate of effect lies close to the true effect for this outcome. The body of evidence has major or numerous deficiencies (or both). We believe that additional evidence is needed before concluding either that the findings are stable or that the estimate of effect is close to the true effect. |
| Very low     | We have no evidence, we are unable to estimate an effect, or we have no confidence in the estimate of effect for this outcome. The body of evidence has unacceptable deficiencies, precluding reaching a conclusion.                                                                                                                      |

Source. Adapted from Balslem et al. 2011.

## Results of Literature Search and Literature Screening

We screened 3,321 titles and abstracts from our literature searches. This represents 3,206 records from database and hand searches plus 115 studies previously included by a comparable search conducted by Doctor Evidence, of which we excluded 32 references. Overall, we identified 92 studies reported in 111 publications that met inclusion criteria (Figure B-1).

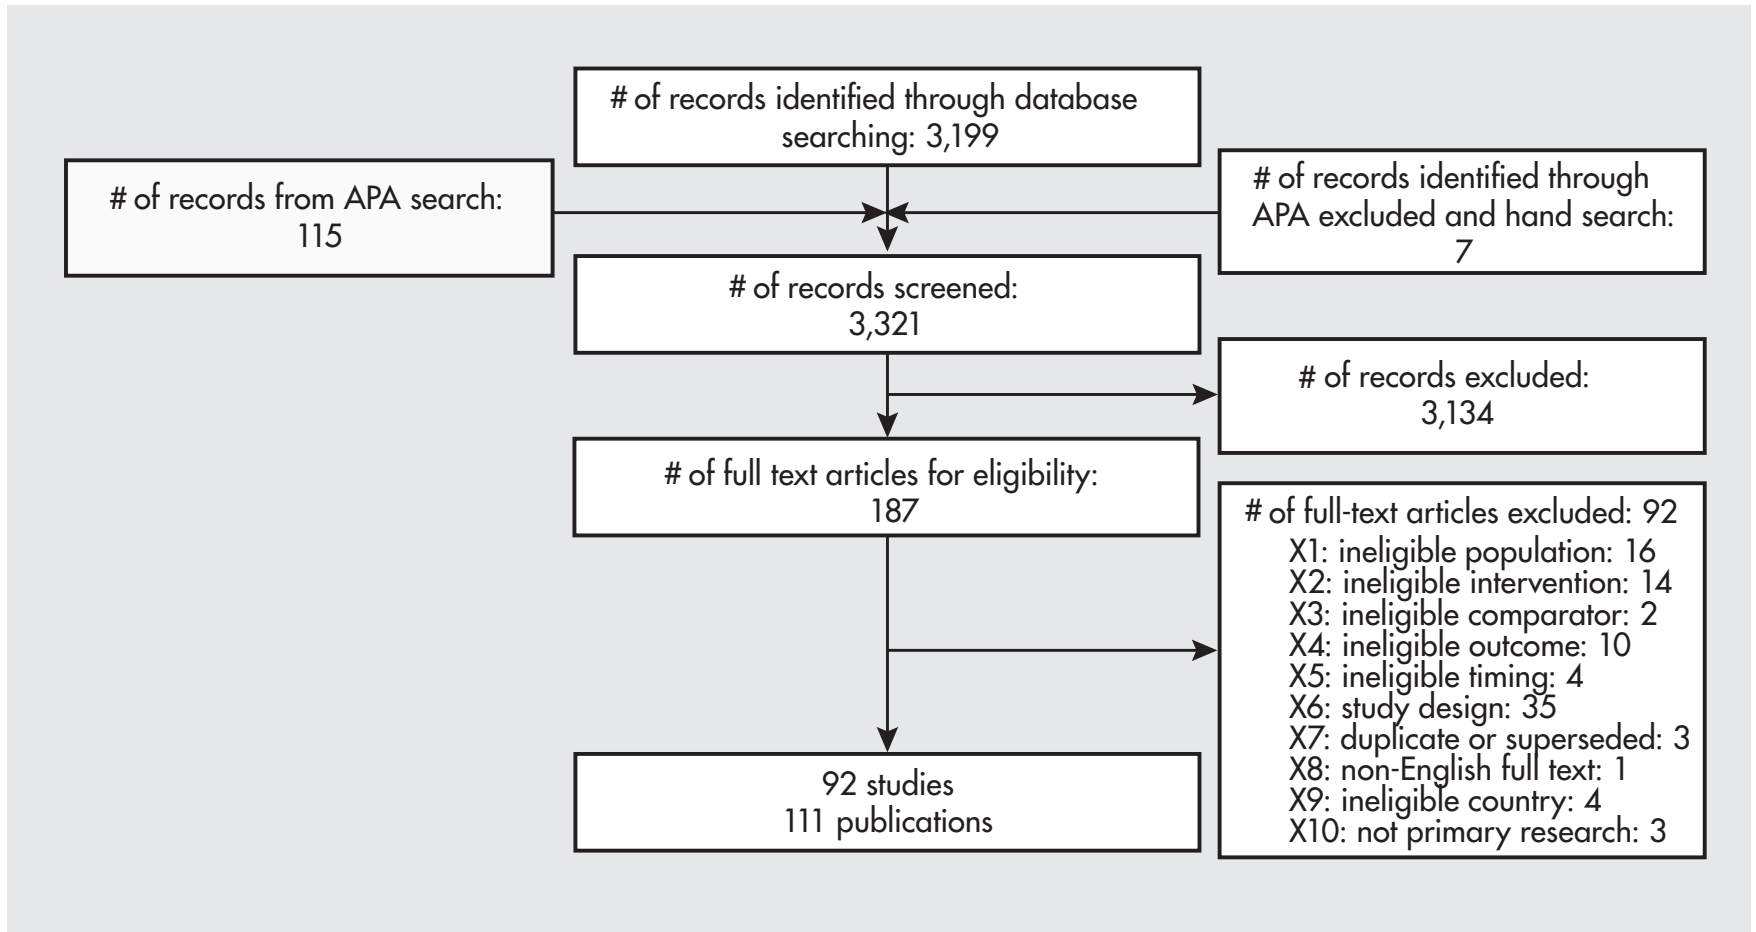

**FIGURE B-1.** PRISMA flow chart.

APA=American Psychiatric Association; PRISMA=Preferred Reporting Items for Systematic Reviews and Meta-Analyses.



## APPENDIX C

# Review of Research Evidence Supporting Guideline Statements

## Assessment and Determination of Treatment Plan

### Statement 1 – Initial Assessment

APA *recommends* (1C) that the initial assessment of a patient with possible borderline personality disorder include the reason the individual is presenting for evaluation; the patient’s goals and preferences for treatment; a review of psychiatric symptoms, including core features of personality disorders and common co-occurring disorders; a psychiatric treatment history; an assessment of physical health; an assessment of psychosocial and cultural factors; a mental status examination; and an assessment of risk of suicide, self-injury, and aggressive behaviors, as outlined in the APA’s *Practice Guidelines for the Psychiatric Evaluation of Adults*, 3rd Edition.

Evidence for this statement comes from general principles of assessment and clinical care in psychiatric practice. Expert opinion suggests that conducting such assessments as part of the initial psychiatric evaluation improves diagnostic accuracy, appropriateness of treatment selection, and treatment safety. For additional details, see Guideline I, “Review of Psychiatric Symptoms, Trauma History, and Psychiatric Treatment History,” Guideline III, “Assessment of Suicide Risk,” Guideline IV, “Assessment of Risk for Aggressive Behaviors,” Guideline V, “Assessment of Cultural Factors,” and Guideline VI, “Assessment of Medical Health,” in the APA’s *Practice Guidelines for the Psychiatric Evaluation of Adults*, 3rd Edition (American Psychiatric Association 2016a). A detailed systematic review to support this statement is outside the scope of this guideline; however, less comprehensive searches of the literature did not yield any studies related to this recommendation in the context of BPD treatment. Consequently, the strength of research evidence is rated as low.

### Grading of the Overall Supporting Body of Research Evidence for Assessment of a Patient with Possible Borderline Personality Disorder

On the basis of the limitations of the evidence for assessment of a patient with possible BPD, no grading of the body of research evidence is possible.

### Statement 2 – Quantitative Measures

APA *suggests* (2C) that the initial psychiatric evaluation of a patient with possible borderline personality disorder include a quantitative measure to identify and determine the severity of symptoms and impairments of functioning that may be a focus of treatment.

Evidence for this statement comes from general principles of assessment and clinical care in psychiatric practice. Consequently, the strength of research evidence is rated as low. Expert opinion



suggests that conducting quantitative assessments as part of the initial psychiatric evaluation improves diagnostic accuracy, appropriateness of treatment selection, and longitudinal assessment of patient symptoms and treatment effects. This recommendation is also consistent with Guideline VII, “Quantitative Assessment,” as part of the *APA Practice Guidelines for the Psychiatric Evaluation of Adults*, 3rd Edition (American Psychiatric Association 2016a).

## Grading of the Overall Supporting Body of Research Evidence for Use of Quantitative Measures

On the basis of the limitations of the evidence for use of quantitative measures, no grading of the body of research evidence is possible.

### Statement 3 – Treatment Planning

*APA recommends (1C)* that a patient with borderline personality disorder have a documented, comprehensive, and person-centered treatment plan.

Evidence for this statement comes from general principles of assessment and clinical care in psychiatric practice. For additional details, see the *APA Practice Guidelines for the Psychiatric Evaluation of Adults*, 3rd Edition (American Psychiatric Association 2016a). A detailed systematic review to support this statement was outside the scope of this guideline; however, less comprehensive searches of the literature did not yield any studies that directly related to this recommendation in the context of BPD treatment. Consequently, the strength of research evidence is rated as low.

## Grading of the Overall Supporting Body of Research Evidence for Evidence-Based Treatment Planning

On the basis of the limitations of the evidence for evidence-based treatment planning, no grading of the body of research evidence is possible.

### Statement 4 – Discussion of Diagnosis and Treatment

*APA recommends (1C)* that a patient with borderline personality disorder be engaged in a collaborative discussion about their diagnosis and treatment, which includes psychoeducation related to the disorder.

In terms of collaborative discussion about diagnosis and treatment, evidence for this statement comes from general principles of clinical care in psychiatric practice. Psychoeducation is also generally accepted as an important element of psychiatric care. In addition, several studies have examined effects of psychoeducation in individuals with BPD, but these did not find a significant effect of psychoeducation, per se.

## Psychoeducation Versus Wait-List

Two randomized controlled trials (RCTs;  $N=50$  and  $N=80$ ), rated as having a moderate risk of bias, assessed the effectiveness of psychoeducation compared with a wait-list control over 12 weeks (Zanarini and Frankenburg 2008; Zanarini et al. 2018). Psychoeducation consisted of an internet-based program detailing the latest information on BPD in one study (Zanarini et al. 2018) and a single workshop in the other (Zanarini and Frankenburg 2008). Participants received psychoeducation in addition to treatment as usual (TAU). Participants in the control group were on a wait-list for psychoeducation and continued with TAU only.

All participants were female, and the majority were White. The mean age was 21 years (Zanarini et al. 2018) and 19 years (Zanarini and Frankenburg 2008). Only one study reported the severity of

BPD at baseline (Zanarini et al. 2018). Participants were mildly ill at baseline with mean Zanarini Rating Scale for BPD (ZAN-BPD) scores ranging from 10.13 to 12.13 (Zanarini et al. 2018).

Detailed information on main study characteristics and treatment effects is presented in Appendix D. Table C–1 presents certainty-of-evidence ratings.

## Severity of Borderline Personality Disorder

Both studies assessed the severity of BPD on the ZAN-BPD (Zanarini and Frankenburg 2008; Zanarini et al. 2018) and reported nonsignificant differences between the psychoeducation and the wait-list groups. In addition, one RCT reported similar treatment effects between groups on the Borderline Evaluation of Severity Over Time (BEST) scale (Zanarini et al. 2018). This RCT reported significantly better scores for the psychoeducation group after 12 months of follow-up (Zanarini et al. 2018). The investigators, however, tested 10 outcome measures and did not adjust for multiple comparisons.

## Severity of Symptoms Associated With Borderline Personality Disorder

The larger of the two RCTs ( $N=80$ ; Zanarini et al. 2018) employing internet-based psychoeducation reported no significant differences between intervention and wait-list groups for anxiety and depressive symptoms. Participants in the psychoeducation group, however, achieved significantly better scores on the Social Adjustment Scale than participants in the wait-list group. As mentioned earlier, however, this study tested 10 outcome measures and did not adjust for multiple testing.

## Global Impression and Functioning

One study ( $N=80$ ; Zanarini et al. 2018) reported similar effects and no significant differences on the Sheehan Disability Scale after 12 weeks and 12 months.

## Incidence of Adverse Events, Serious Adverse Events, and Withdrawal Due to Adverse Events

None of the studies reported on the incidence of adverse events, serious adverse events, or withdrawal due to adverse events (Zanarini and Frankenburg 2008; Zanarini et al. 2018).

## Grading of the Overall Supporting Body of Research Evidence for Psychoeducation in Patients With BPD

- *Magnitude of effect*: None noted. In the two studies that specifically assessed psychoeducation in BPD, no differences were noted as compared to a wait-list control condition.
- *Risk of bias*: Moderate. Both studies of psychoeducation in BPD were rated as having a moderate risk of bias.
- *Applicability*: In both studies, participants were female, with a mean age of 19–22 years. Race was predominantly White in both studies, with some other races and ethnicities represented in one study. One study used in-person psychoeducation, whereas the other study used internet-based psychoeducation, which is less common. One of the studies also excluded individuals who were currently receiving psychiatric treatment, which would also be atypical. Thus, the applicability of these studies to typical treatment of individuals with BPD appears limited.
- *Directness*: Direct. Measured outcomes include BPD symptom severity and functioning.
- *Consistency*: Inconsistent. The internet-based psychoeducation study showed better outcomes with psychoeducation at 12 weeks on social adjustment and at 12 months on BPD severity, whereas the other study showed no differences with psychoeducation.
- *Precision*: Imprecise. The studies did not meet the optimal information size (i.e., number of participants in a meta-analysis).

**TABLE C-1. Certainty-of-evidence ratings of outcomes comparing psychoeducation with wait-list control**

| Outcomes                                          | Participants, <i>N</i> ( <i>studies</i> )                           | Certainty of the evidence (GRADE)          | Anticipated absolute effects |                              |                                           |
|---------------------------------------------------|---------------------------------------------------------------------|--------------------------------------------|------------------------------|------------------------------|-------------------------------------------|
|                                                   |                                                                     |                                            | Relative effect (95% CI)     | Effect with wait-list        | Difference in effect with psychoeducation |
| <b>Severity of BPD</b>                            |                                                                     |                                            |                              |                              |                                           |
| Assessed with ZAN-BPD<br>Follow-up: mean 12 weeks | 130 (two RCTs: Zanarini and Frankenburg 2008; Zanarini et al. 2018) | ⊕⊕○○; LOW <sup>a</sup> for similar effects | –                            | Mean score at endpoint=9.16  | Mean 1.33 lower (ns)                      |
| <b>Anxiety</b>                                    |                                                                     |                                            |                              |                              |                                           |
| Assessed with CUXOS<br>Follow-up: mean 12 weeks   | 80 (one RCT: Zanarini et al. 2018)                                  | ⊕⊕○○; LOW <sup>b</sup> for similar effects | –                            | Mean score at endpoint=40.11 | Mean 4.96 lower (ns)                      |
| <b>Depression</b>                                 |                                                                     |                                            |                              |                              |                                           |
| Assessed with CUDOS<br>Follow-up: mean 12 weeks   | 80 (one RCT: Zanarini et al. 2018)                                  | ⊕⊕○○; LOW <sup>b</sup> for similar effects | –                            | Mean score at endpoint=26.89 | Mean 6.11 lower (ns)                      |
| <b>Functioning</b>                                |                                                                     |                                            |                              |                              |                                           |
| Assessed with SDS<br>Follow-up: mean 12 weeks     | 80 (one RCT: Zanarini et al. 2018)                                  | ⊕⊕○○; LOW <sup>b</sup> for similar effects | –                            | Mean score at endpoint=9.76  | Mean 2.18 higher (ns)                     |

BPD=borderline personality disorder; CI=confidence interval; CUDOS=Clinically Useful Depression Outcome Scale; CUXOS=Clinically Useful Anxiety Outcome Scale; GRADE=Grading of Recommendations Assessment, Development, and Evaluation; ns=not significant; *N*=sample size; RCT=randomized controlled trial; SDS=Sheehan Disability Scale; ZAN-BPD=Zanarini Rating Scale for Borderline Personality Disorder.

<sup>a</sup>Studies do not meet optimal information size (i.e., number of participants in a meta-analysis); downgraded two steps for imprecision.

<sup>b</sup>Study does not meet optimal information size (i.e., number of participants in a meta-analysis); downgraded two steps for imprecision.

- *Dose-response relationship*: Not applicable. Dose-response was not studied.
- *Confounding factors (including likely direction of effect)*: Not identified.
- *Publication bias*: Not identified.
- *Overall strength of research evidence*: Low. Only two studies are available that assessed BPD severity, and, for other outcomes including functioning, only one study was available. Both studies were relatively small and were of moderate risk of bias. The strength of evidence was also downgraded for imprecision, and there was inconsistency in the findings of the two studies.

## Psychosocial Interventions

### Statement 5 – Psychotherapy

APA *recommends (1B)* that a patient with borderline personality disorder be treated with a structured approach to psychotherapy that has support in the literature and targets the core features of the disorder.

Evidence in the treatment of adults with BPD comes from the systematic review conducted by RTI. The data from clinical trials include comparisons with wait-list control and TAU conditions as well as head-to-head comparisons of specific psychotherapies. For the vast majority of treatments, there were only one or two studies of each comparison, which makes it challenging to draw robust conclusions. Notably, in the vast majority of studies that used TAU or an active comparator treatment, all treatment arms showed improvement with psychotherapy even when differences between the treatment groups did not show statistically significant differences. This consistency as well as the superiority of many of the psychotherapies to TAU led the writing group to assess the overall strength of research evidence as moderate for psychotherapy in BPD.

For adolescents with BPD, the evidence for psychotherapeutic interventions is more limited but generally consistent with the benefits of treatment found in adults. Two studies in adolescents met the inclusion criteria for this review (Chanen et al. 2008; Santisteban et al. 2015) and are discussed in further detail later in this appendix and in Appendix D. Other studies in adolescents did not meet inclusion criteria, primarily because they included patients with borderline traits as well as patients who fulfilled criteria for a diagnosis of BPD. A systematic review of studies in adolescents concluded that additional rigorous trials are needed because current studies have small samples, high attrition rates, inconsistent findings, and high risks of bias (Jørgensen et al. 2021).

#### Interpersonal Psychotherapy Versus Wait-List Plus Clinical Management

One RCT (Bozzatello and Bellino 2020) evaluated the efficacy of interpersonal psychotherapy compared with wait-list plus clinical management. The study included 43 participants in Italy who were assessed at 10 months. This study was rated as having a moderate risk of bias. The trial was funded by the Italian government.

The majority of the study participants were female; race was not reported. The overall mean age of participants was 35 years of age. The study excluded patients receiving psychiatric services or who had existing schizophrenia, bipolar disorder, mental impairment, or drug or alcohol dependence.

The intervention group received 22 sessions in the first 20 weeks and 20 sessions in the last 20 weeks. Each session lasted 50 minutes. TAU consisted of case management provided by hospital and primary and community care services.

Detailed information on main study characteristics and treatment effects is presented in Appendix D. Table C–2 presents certainty-of-evidence ratings.

**TABLE C-2. Certainty-of-evidence ratings of outcomes comparing IPT with wait-list plus clinical management**

| Outcomes                                                   | Participants, <i>N</i> ( <i>studies</i> ) | Certainty of the evidence (GRADE)                   | Anticipated absolute effects |                                                    |                                                                                       |
|------------------------------------------------------------|-------------------------------------------|-----------------------------------------------------|------------------------------|----------------------------------------------------|---------------------------------------------------------------------------------------|
|                                                            |                                           |                                                     | Relative effect (95% CI)     | Effect with wait-list plus clinical management     | Difference in effect with IPT                                                         |
| <b>Severity of BPD</b>                                     |                                           |                                                     |                              |                                                    |                                                                                       |
| Assessed with BPDSI<br>Follow-up: mean 10 months           | 43 (one RCT: Bozzatello and Bellino 2020) | ⊕⊕○○ LOW <sup>a</sup> for greater effects with IPT  | –                            | Mean score at endpoint=36.1                        | Mean 8.4 lower ( <i>P</i> =0.01)                                                      |
| <b>Severity of BPD symptoms</b>                            |                                           |                                                     |                              |                                                    |                                                                                       |
| Assessed with BIS-11 and SHI<br>Follow-up: mean 10 months  | 43 (one RCT: Bozzatello and Bellino 2020) | ⊕○○○; VERY LOW <sup>b</sup> for similar effects     | –                            | Mean score at endpoint on BIS-11=64.8, on SHI=6.91 | Mean 12.6 lower on BIS-11 ( <i>P</i> =0.03) and 2.8 higher on SHI ( <i>P</i> =0.27)   |
| <b>Functioning</b>                                         |                                           |                                                     |                              |                                                    |                                                                                       |
| Assessed with CGI-S and SOFAS<br>Follow-up: mean 10 months | 43 (one RCT: Bozzatello and Bellino 2020) | ⊕⊕○○; LOW <sup>a</sup> for greater effects with IPT | –                            | Mean score at endpoint on CGI-S=3.1, on SOFAS=57.1 | Mean 1.0 lower on CGI-S ( <i>P</i> =0.009) and 11.1 higher on SOFAS ( <i>P</i> =0.02) |

BIS-11=Barratt Impulsiveness Scale, Version 11; BPD=borderline personality disorder; BPDSI=Borderline Personality Disorder Severity Index; CGI-S=Clinical Global Impression-Severity; CI=confidence interval; GRADE=Grading of Recommendations, Assessment, Development, and Evaluation; IPT=interpersonal psychotherapy; RCT=randomized controlled trial; SHI=Self-Harm Inventory; SOFAS=Social Occupational Functioning Assessment Scale.

<sup>a</sup>Study does not meet optimal information size (i.e., number of participants in a meta-analysis); downgraded two steps for imprecision.

<sup>b</sup>Study does not meet optimal information size (i.e., number of participants in a meta-analysis); downgraded two steps for imprecision; inconsistent direction of effect on measures of severity of BPD symptoms; downgraded one step for inconsistency.

### **Severity of borderline personality disorder**

After 10 months of treatment, the study reported significantly greater improvements on the Borderline Personality Disorder Severity Index for participants in the interpersonal psychotherapy group compared with the wait-list plus clinical management group (Bozzatello and Bellino 2020).

### **Severity of symptoms associated with borderline personality disorder**

After 10 months of treatment, the study reported significantly greater improvements on the Barratt Impulsiveness Scale (BIS), version 11, but not on the Self-Harm Inventory, for participants in the interpersonal psychotherapy group compared with the wait-list plus clinical management group (Bozzatello and Bellino 2020).

### **Global impression and functioning**

After 10 months of treatment, the study reported significantly greater improvements on the Clinical Global Impression (CGI) scale, Severity item and the Social Occupational Functioning Assessment Scale for participants in the interpersonal psychotherapy group compared with the wait-list plus clinical management group (Bozzatello and Bellino 2020).

### **Incidence of adverse events, serious adverse events, and withdrawal due to adverse events**

The study did not report on the incidence of adverse events, serious adverse events, or withdrawal due to adverse events.

## Acceptance and Commitment Therapy Versus Treatment as Usual

One RCT (Morton et al. 2012) evaluated the efficacy of acceptance and commitment therapy (ACT) in addition to TAU compared with TAU alone. The Australian study included 41 participants who were followed for a duration of 13 weeks. The study was rated as having a moderate risk of bias because of high attrition. The trial did not report funding.

Almost all of the study participants were female. The mean age of the ACT group was 36 years, while the mean age of the TAU group was 34 years. The study excluded participants with psychotic symptoms (besides “reactive psychotic symptoms” associated with BPD [not specified further]), with intellectual disability, with cognitive impairment, or who were a significant risk to other participants.

ACT was delivered as weekly group sessions that included performing mindfulness exercises, doing emotions skills training, focusing on awareness of one’s values, and identifying choice points for action. TAU consisted of case management provided by public mental health services in Australia.

Detailed information on main study characteristics and treatment effects is presented in Appendix D. Table C–3 presents certainty-of-evidence ratings.

### **Severity of borderline personality disorder**

After 13 weeks of treatment, the study reported significantly greater improvements on the BEST scale for participants in the ACT group compared with the TAU group (Morton et al. 2012).

### **Severity of symptoms associated with borderline personality disorder**

After 13 weeks, participants who received ACT in addition to TAU had significantly greater improvements than participants treated with TAU only on the Beck Hopelessness Scale, the Difficulties in Emotion Regulation Scale, and the subscale for anxiety of the Depression Anxiety Stress Scale. Changes on the subscales for depression and stress of the Depression Anxiety Stress Scale were also greater for the ACT group but did not achieve statistical significance (Morton et al. 2012).

**TABLE C-3. Certainty-of-evidence ratings of outcomes comparing ACT with TAU**

| Outcomes                                       | Participants, <i>N</i> ( <i>studies</i> ) | Certainty of the evidence (GRADE)                  | Anticipated absolute effects |                              |                                    |
|------------------------------------------------|-------------------------------------------|----------------------------------------------------|------------------------------|------------------------------|------------------------------------|
|                                                |                                           |                                                    | Relative effect (95% CI)     | Effect with TAU              | Difference in effect with ACT      |
| <b>Severity of BPD</b>                         |                                           |                                                    |                              |                              |                                    |
| Assessed with BEST<br>Follow-up: mean 13 weeks | 41 (one RCT: Morton et al. 2012)          | ⊕⊕○○; LOW <sup>a</sup> for greater effect with ACT | –                            | Mean score at endpoint=47.4  | Mean 17.2 lower ( <i>P</i> =0.028) |
| <b>Anxiety</b>                                 |                                           |                                                    |                              |                              |                                    |
| Assessed with DASS<br>Follow-up: mean 12 days  | 41 (one RCT: Morton et al. 2012)          | ⊕⊕○○; LOW <sup>a</sup> for greater effect with ACT | –                            | Mean score at endpoint=26.3  | Mean 11.6 lower ( <i>P</i> =0.025) |
| <b>Depression</b>                              |                                           |                                                    |                              |                              |                                    |
| Assessed with DASS<br>Follow-up: mean 13 weeks | 41 (one RCT: Morton et al. 2012)          | ⊕⊕○○; LOW <sup>a</sup> for greater effect with ACT | –                            | Mean score at endpoint=31.0  | Mean 15 lower (ns)                 |
| <b>Difficulties in emotion regulation</b>      |                                           |                                                    |                              |                              |                                    |
| Assessed with DERS<br>Follow-up: mean 13 weeks | 41 (one RCT: Morton et al. 2012)          | ⊕⊕○○; LOW <sup>a</sup> for greater effect with ACT | –                            | Mean score at endpoint=140.0 | Mean 35.3 lower ( <i>P</i> =0.008) |
| <b>Hopelessness</b>                            |                                           |                                                    |                              |                              |                                    |
| Assessed with BHS<br>Follow-up: mean 13 weeks  | 41 (one RCT: Morton et al. 2012)          | ⊕⊕○○; LOW <sup>a</sup> for greater effect with ACT | –                            | Mean score at endpoint=16.4  | Mean 8.9 lower ( <i>P</i> =0.006)  |

The risk in the intervention group (and its 95% CI) is based on the assumed risk in the comparison group and the relative effect of the intervention (and its 95% CI).

ACT=acceptance and commitment therapy; BEST=Borderline Evaluation of Severity Over Time; BHS=Beck Hopelessness Scale; BPD=borderline personality disorder; CI=confidence interval; DASS=Depression Anxiety Stress Scale; DERS=Difficulties in Emotion Regulation Scale; GRADE=Grading of Recommendations Assessment, Development, and Evaluation; ns=not significant; RCT=randomized controlled trial; TAU=treatment as usual.

<sup>a</sup>Study does not meet optimal information size (i.e., number of participants in a meta-analysis); downgraded two steps for imprecision.

## **Global impression and functioning**

The study did not assess measures of global impression or functioning (Morton et al. 2012).

## **Incidence of adverse events, serious adverse events, and withdrawal due to adverse events**

The study did not report on the incidence of adverse events, serious adverse events, or withdrawal due to adverse events.

## **Manual-Assisted Cognitive Therapy Versus Treatment as Usual**

One U.S. RCT (Weinberg et al. 2006) evaluated the efficacy of manual-assisted cognitive therapy (MACT), compared with TAU. Overall, the study provided data on 30 participants. The study was rated as having a moderate risk of bias. Follow-up duration was 6 months after treatment. The study was supported by a Young Investigator Award from the Borderline Personality Disorder Research Foundation. The majority of the study participants were female and White and had a mean age of 28 years. The study did not report on baseline severity. The study excluded participants with psychotic disorders, substance abuse disorder, or risk of suicide.

MACT was administered as an adjunctive intervention to TAU and comprised six sessions, over 6–8 weeks, incorporating elements of dialectical behavior therapy (DBT), cognitive-behavioral therapy (CBT), and bibliotherapy, modified to focus on deliberate self-harm. Each session was structured around a chapter of a booklet, covering functional analysis of episodes of parasuicide (defined as deliberate self-harm or suicide attempts), emotion regulation strategies, problem-solving strategies, management of negative thinking, management of substance use, and relapse prevention strategies. TAU consisted of standard care.

Detailed information on main study characteristics and treatment effects is presented in Appendix D. Table C–4 presents certainty-of-evidence ratings.

## **Severity of borderline personality disorder**

The study did not report on the severity of BPD.

## **Severity of symptoms associated with borderline personality disorder**

The study (Weinberg et al. 2006) reported significant reductions in the frequency and severity of deliberate self-harm for participants in the MACT group when compared with TAU after 6 months of treatment. The authors recorded the use of the Parasuicide History Interview to identify the frequency or severity of deliberate self-harm but did not specify the range of the scale for assessing severity.

## **Global impression and functioning**

The study did not report on global impression or functioning.

## **Incidence of adverse events, serious adverse events, and withdrawal due to adverse events**

The study did not report on the incidence of adverse events, serious adverse events, or withdrawal due to adverse events.

## **Cognitive-Behavioral Therapy Versus Treatment as Usual**

The Borderline Personality Disorder Study of Cognitive Therapy (BOSCOT) RCT (Davidson et al. 2006) evaluated the efficacy of CBT in addition to TAU compared with TAU only. The study included 106 participants in the United Kingdom who were followed for a duration of 24 months. The study was rated as having a moderate risk of bias. The trial was funded by a public foundation.

The majority of the study participants were female, and all of them were White (Davidson et al. 2006). The overall mean age of participants was 32 years of age. The study excluded patients receiv-



**TABLE C-4. Certainty-of-evidence ratings of outcomes comparing MACT with TAU**

| Outcomes                                                                            | Participants, <i>N</i> (studies)   | Certainty of the evidence (GRADE)                    | Relative effect (95% CI) | Anticipated absolute effects         |                                    |
|-------------------------------------------------------------------------------------|------------------------------------|------------------------------------------------------|--------------------------|--------------------------------------|------------------------------------|
|                                                                                     |                                    |                                                      |                          | Effect with TAU                      | Difference in effect with MACT     |
| <b>Deliberate self-harm</b>                                                         |                                    |                                                      |                          |                                      |                                    |
| Assessed with deliberate self-harm frequency (scale NR)<br>Follow-up: mean 6 months | 30 (one RCT: Weinberg et al. 2006) | ⊕⊕○○; LOW <sup>a</sup> for greater effects with MACT | –                        | Mean at endpoint for frequency=6.69  | Mean 4.71 lower ( <i>P</i> <0.001) |
| Assessed with deliberate self-harm severity (scale NR)<br>Follow-up: mean 6 months  | 30 (one RCT: Weinberg et al. 2006) | ⊕⊕○○; LOW <sup>a</sup> for greater effects with MACT | –                        | Mean severity score at endpoint=1.01 | Mean 0.5 lower ( <i>P</i> <0.001)  |

CI=confidence interval; GRADE=Grading of Recommendations Assessment, Development, and Evaluation; MACT=manual-assisted cognitive therapy; NR=not reported; RCT=randomized controlled trial; TAU=treatment as usual.

<sup>a</sup>Study does not meet optimal information size (i.e., number of participants in a meta-analysis); downgraded two steps for imprecision.

ing psychiatric services or who had existing schizophrenia or bipolar disorder, mental impairment, or drug or alcohol dependence.

The intervention group received an average of 27 sessions of CBT over 12 months in addition to TAU (Davidson et al. 2006). Each session lasted 1 hour. TAU consisted of case management provided by hospital and primary and community care services.

Detailed information on main study characteristics and treatment effects is presented in Appendix D. Table C-5 presents certainty-of-evidence ratings.

### **Severity of borderline personality disorder**

The study did not report on the severity of BPD.

### **Severity of symptoms associated with borderline personality disorder**

The proportion of participants in the study (Davidson et al. 2006) who engaged in suicidal acts (defined as acts that were deliberate, life threatening, and resulting in or requiring medical intervention) was not significantly different between treatment groups after 24 months of follow-up. The number of mean suicidal acts per person had not reached significant differences at 12 months but was significantly lower for participants in the CBT group than the TAU group after 24 months. Improvements on the State-Trait Anxiety Inventory were significantly greater for participants in the CBT group compared with those treated with TAU only after 24 months but not after 12 months. No significant differences between treatment groups could be detected on the Beck Depression Inventory (BDI) or for the number of hospitalizations after 12 months.

### **Global impression and functioning**

No significant differences between treatment groups were detected for the Social Functioning Questionnaire and the European Quality of Life-5 Dimension instrument after 12 months (Davidson et al. 2006).

### **Incidence of adverse events, serious adverse events, and withdrawal due to adverse events**

The study did not report on the incidence of adverse events, serious adverse events, or withdrawal due to adverse events.

## **Dialectical Behavior Therapy Versus Treatment as Usual**

Six studies, four RCTs (Carter et al. 2010; Feigenbaum et al. 2012; McMMain et al. 2017; Verheul et al. 2003), a nonrandomized trial (Bohus et al. 2004), and a retrospective cohort study (Gregory and Sachdeva 2016), evaluated the efficacy of DBT compared with TAU. Overall, these studies provided data on 483 participants. Three studies were rated as having a high risk of bias, two as moderate risk of bias, and one as low risk of bias. Reasons for ratings of high risk of bias were lack of intention-to-treat analysis and high attrition. Follow-up durations ranged from 3 months to 12 months. One trial was funded by a health insurance company; the other studies were publicly funded or did not report source of funding.

The majority of study participants were female, and mean ages ranged from 25 years to 35 years. Only one study, in which the majority of participants were White, reported on race or ethnicity. Likewise, only one study reported the severity of BPD at baseline (Gregory and Sachdeva 2016). In this retrospective cohort study, participants were moderately ill at baseline, with BEST scores of 45 to 49. Studies excluded patients with psychiatric comorbidities such as schizophrenia, major depressive disorder (MDD), alcohol or substance use disorder, and bipolar disorder.

DBT combines weekly individual psychotherapy sessions, weekly skills training groups, and weekly supervision and consultation meetings for the therapists. One study assessed brief DBT with skills training only over 20 weeks (McMMain et al. 2017). All studies enrolled outpatients, except a study from Germany, which conducted DBT as an inpatient treatment (Bohus et al. 2004).

**TABLE C-5. Certainty-of-evidence ratings of outcomes comparing CBT with TAU**

| Outcomes                                             | Participants, <i>N</i> ( <i>studies</i> ) | Certainty of the evidence (GRADE)                  | Anticipated absolute effects |                              |                                            |
|------------------------------------------------------|-------------------------------------------|----------------------------------------------------|------------------------------|------------------------------|--------------------------------------------|
|                                                      |                                           |                                                    | Relative effect (95% CI)     | Effect with TAU              | Difference in effect with CBT              |
| <b>Anxiety</b>                                       |                                           |                                                    |                              |                              |                                            |
| Assessed with STAI<br>Follow-up: mean 24 months      | 102 (one RCT: Davidson et al. 2006)       | ⊕⊕○○; LOW <sup>a</sup> for greater effect with CBT | –                            | Mean score at endpoint=50.9  | Mean 7.96 lower (0 to 0)                   |
| <b>Depression</b>                                    |                                           |                                                    |                              |                              |                                            |
| Assessed with BDI<br>Follow-up: mean 24 months       | 102 (one RCT: Davidson et al. 2006)       | ⊕⊕○○; LOW <sup>a</sup> for similar effects         | –                            | Mean score at endpoint=28.8  | Mean 2.3 lower (0 to 0)                    |
| <b>Proportion of participants with suicidal acts</b> |                                           |                                                    |                              |                              |                                            |
| Follow-up: mean 24 months                            | 102 (one RCT: Davidson et al. 2006)       | ⊕⊕○○; LOW <sup>b</sup> for similar risks           | OR 0.78 (0.30–1.98)          | 531 per 1,000                | 62 fewer per 1,000 (277 fewer to 161 more) |
| <b>Mean number of suicidal acts</b>                  |                                           |                                                    |                              |                              |                                            |
| Follow-up: mean 24 months                            | 102 (one RCT: Davidson et al. 2006)       | ⊕⊕○○; LOW <sup>b</sup> for greater effect with CBT | –                            | Mean number at endpoint=1.73 | Mean 0.91 lower (1.67 lower to 0.15 lower) |
| <b>Quality of life</b>                               |                                           |                                                    |                              |                              |                                            |
| Assessed with EQ-5D<br>Follow-up: mean 24 months     | 102 (one RCT: Davidson et al. 2006)       | ⊕⊕○○; LOW <sup>a</sup> for similar effects         | –                            | Mean score at endpoint=0.66  | Mean 0.02 lower (0 to 0)                   |
| <b>Social functioning</b>                            |                                           |                                                    |                              |                              |                                            |
| Assessed with SFQ<br>Follow-up: mean 24 months       | 102 (one RCT: Davidson et al. 2006)       | ⊕⊕○○; LOW <sup>a</sup> for similar effects         | –                            | Mean score at endpoint=12.3  | Mean 0.7 lower (0 to 0)                    |

BDI=Beck Depression Inventory; CBT=cognitive-behavioral therapy; CI=confidence interval; EQ-5D=European Quality of Life–5 Dimension; GRADE=Grading of Recommendations Assessment, Development, and Evaluation; OR=odds ratio; RCT=randomized controlled trial; SFQ=Social Functioning Questionnaire; STAI=State-Trait Anxiety Inventory; TAU=treatment as usual.

<sup>a</sup>Study does not meet optimal information size (i.e., number of participants in a meta-analysis); downgraded two steps for imprecision.

<sup>b</sup>Few events; downgraded two steps for imprecision.

TAU consisted of a range of individualized service provisions and professional mental health care. All except one study (Gregory and Sachdeva 2016) employed a wait-list design in which participants of the TAU groups were offered DBT at the end of the study.

Detailed information on main study characteristics and treatment effects is presented in Appendix D. Table C–6 presents certainty-of-evidence ratings.

### **Severity of borderline personality disorder**

In the study by McMain et al. (2017) ( $N=84$ ), rated as having a moderate risk of bias, participants receiving brief DBT achieved significantly greater reductions on the Borderline Symptom List–23 (BSL-23) compared with participants in the TAU group at the end of the intervention (20 weeks) but not at the 32-week follow-up. A retrospective cohort study ( $N=41$ ; Gregory and Sachdeva 2016) also reported no significant differences on the BEST scale between participants treated with DBT and TAU after 12 months.

### **Severity of symptoms associated with borderline personality disorder**

All six studies reported on changes in symptoms associated with BPD (Bohus et al. 2004; Carter et al. 2010; Feigenbaum et al. 2012; Gregory and Sachdeva 2016; McMain et al. 2017; Verheul et al. 2003). The two RCTs ( $N=84$  and  $N=58$ ), rated as having a moderate risk of bias, reported fewer suicide attempts in participants assigned to the DBT group than in participants receiving TAU (McMain et al. 2017; Verheul et al. 2003). By contrast, two studies (one RCT [Feigenbaum et al. 2012] and one cohort study [Gregory and Sachdeva 2016]), rated as having a high risk of bias, reported no significant differences in suicide attempts between treatment groups.

All studies reported on self-harm, defined variously as deliberate self-harm, self-injury, and self-mutilation. The majority of trials also showed greater reductions in self-harm in the DBT group than in the TAU group. In two trials (total  $N$  of 108), the difference in self-mutilating behaviors reached statistical significance (Bohus et al. 2004; Verheul et al. 2003).

Two studies, rated as having a high risk of bias, reported no significant differences in dissociative experiences between DBT and TAU (Bohus et al. 2004; Feigenbaum et al. 2012). One study reported on improvements of aggression (Feigenbaum et al. 2012) and impulsiveness (McMain et al. 2017), respectively; neither reported significant differences.

Studies reported mixed results regarding differences in efficacy between DBT and TAU to improve the severity of anger (Bohus et al. 2004; Feigenbaum et al. 2012; McMain et al. 2017) and depressive symptoms (Bohus et al. 2004; Feigenbaum et al. 2012; McMain et al. 2017).

### **Global impression and functioning**

Significantly more participants in the brief DBT group than in the TAU group achieved clinically relevant improvements on the Symptom Checklist–90–Revised (SCL-90-R) at 32 weeks (McMain et al. 2017). Likewise, Bohus et al. (2004) reported greater improvements on the Global Severity Index and the Global Assessment of Functioning (GAF) Scale after 4 months of treatment with DBT than TAU.

### **Incidence of adverse events, serious adverse events, and withdrawal due to adverse events**

None of the studies reported on the incidence of adverse events and serious adverse events. The retrospective cohort study (Gregory and Sachdeva 2016) found no differences in withdrawals due to adverse events between participants treated with DBT and TAU (0% vs. 0%).

## **Dialectical Behavior Therapy Versus Mentalization-Based Treatment**

One nonrandomized clinical trial (Barnicot and Crawford 2019), conducted in the United Kingdom and rated as having a high risk of bias, compared DBT with mentalization-based treatment (MBT) in 90 patients with BPD. The majority of participants were female (72%), with a mean age of 31

**TABLE C-6. Certainty-of-evidence ratings of outcomes comparing DBT with TAU**

| Outcomes                                                                        | Participants, <i>N</i> ( <i>studies</i> )                                                                                                                                             | Certainty of the evidence (GRADE)                     | Relative effect (95% CI) | Anticipated absolute effects          |                               |
|---------------------------------------------------------------------------------|---------------------------------------------------------------------------------------------------------------------------------------------------------------------------------------|-------------------------------------------------------|--------------------------|---------------------------------------|-------------------------------|
|                                                                                 |                                                                                                                                                                                       |                                                       |                          | Effect with TAU                       | Difference in effect with DBT |
| <b>Severity of BPD</b>                                                          |                                                                                                                                                                                       |                                                       |                          |                                       |                               |
| Assessed with BSC-23<br>Follow-up: mean 32 weeks                                | 125 (one RCT, one observational study: Gregory and Sachdeva 2016; McMain et al. 2017)                                                                                                 | ⊕⊕○○ LOW <sup>a</sup> for similar effects             | –                        | Mean score at endpoint=45.99*         | Mean 4.91 higher (ns)         |
| <b>Anger, depression</b>                                                        |                                                                                                                                                                                       |                                                       |                          |                                       |                               |
| Assessed with various scales<br>Follow-up: 3–12 months                          | 227 (one RCT, one nRCT, one observational study: Bohus et al. 2004; Feigenbaum et al. 2012; Gregory and Sachdeva 2016; McMain et al. 2017)                                            | ⊕○○○; VERY LOW <sup>a,b,c,d</sup> for similar effects | –                        | Inconsistent effects with TAU         | Inconsistent                  |
| <b>Dissociative experiences</b>                                                 |                                                                                                                                                                                       |                                                       |                          |                                       |                               |
| Assessed with DES<br>Follow-up: 3–12 months                                     | 102 (one RCT, one nRCT: Bohus et al. 2004; Feigenbaum et al. 2012)                                                                                                                    | ⊕○○○; VERY LOW <sup>a,e</sup> for similar effects     | –                        | Mean score at endpoint=83.3           | Mean 0.1 higher (ns)          |
| <b>Impulsiveness</b>                                                            |                                                                                                                                                                                       |                                                       |                          |                                       |                               |
| Assessed with BIS<br>Follow-up: mean 32 weeks                                   | 84 (one RCT: McMain et al. 2017)                                                                                                                                                      | ⊕⊕○○; LOW <sup>e</sup> for similar effects            | –                        | Mean score at endpoint=55.16          | Mean 1.84 lower (ns)          |
| <b>Self-harm</b>                                                                |                                                                                                                                                                                       |                                                       |                          |                                       |                               |
| Assessed with DSHI, self-injury, self-mutilation<br>Follow-up: mean 3–12 months | 367 (four RCTs, one nRCT, one observational study: Bohus et al. 2004; Carter et al. 2010; Feigenbaum et al. 2012; Gregory and Sachdeva 2016; McMain et al. 2017; Verheul et al. 2003) | ⊕⊕○○; LOW <sup>b,c</sup> for greater effect with DBT  | Not estimable            | Mean score for DSHI at endpoint=1.14* | Mean 0.34 lower (ns)          |
| <b>Suicidal and nonsuicidal self-injuries</b>                                   |                                                                                                                                                                                       |                                                       |                          |                                       |                               |
| Assessed with LSASI<br>Follow-up: mean 32 weeks                                 | 184 (three RCTs: Feigenbaum et al. 2012; McMain et al. 2017; Verheul et al. 2003)                                                                                                     | ⊕⊕○○; LOW <sup>a</sup> for greater effect with DBT    | –                        | Mean score at endpoint=2.56*          |                               |

**TABLE C-6. Certainty-of-evidence ratings of outcomes comparing DBT with TAU (continued)**

| Outcomes                                         | Participants, <i>N</i> (studies)                        | Certainty of the evidence (GRADE)                         | Relative effect (95% CI) | Anticipated absolute effects |                               |
|--------------------------------------------------|---------------------------------------------------------|-----------------------------------------------------------|--------------------------|------------------------------|-------------------------------|
|                                                  |                                                         |                                                           |                          | Effect with TAU              | Difference in effect with DBT |
| <b>General psychopathology</b>                   |                                                         |                                                           |                          |                              |                               |
| Assessed with SCL-90-R; follow-up: mean 32 weeks | 134 (two RCTs: Bohus et al. 2004; McMain et al. 2017)   | ⊕⊕○○; LOW <sup>a</sup> for greater effect with DBT        | OR 3.44 (NR)             | 184 per 1,000*               |                               |
| <b>Functioning</b>                               |                                                         |                                                           |                          |                              |                               |
| Assessed with GAF; follow-up: mean 4 months      | 50 (one RCT: Bohus et al. 2004)                         | ⊕○○○; VERY LOW <sup>a,e</sup> for greater effect with DBT | -                        | Mean score at endpoint=49.4  |                               |
| <b>Withdrawal due to adverse events</b>          |                                                         |                                                           |                          |                              |                               |
| Follow-up: 12 months                             | 41 (one observational study: Gregory and Sachdeva 2016) | ⊕○○○; VERY LOW <sup>a,e</sup> for similar risks           | RR 1 (- to -)            | 0 per 1,000                  |                               |

The risk in the intervention group (and its 95% CI) is based on the assumed risk in the comparison group and the relative effect of the intervention (and its 95% CI).

BIS=Barratt Impulsiveness Scale; BPD=borderline personality disorder; BSC-23=Borderline Symptom Checklist-23; CI=confidence interval; DBT=dialectical behavior therapy; DES=Dissociative Experiences Scale; DSHI=Deliberate Self-Harm Inventory; GAF=Global Assessment of Functioning; GRADE=Grading of Recommendations Assessment, Development, and Evaluation; LSASI=Lifetime Suicide Attempt Self-Injury Interview; NR=not reported; nRCT=nonrandomized controlled trial; ns=not significant; OR=odds ratio; RCT=randomized controlled trial; RR=risk ratio; SCL-90-R=Symptom Checklist-90-Revised; TAU=treatment as usual.

\*Data based on McMain et al. 2017.

<sup>a</sup>Studies do not meet optimal information size (i.e., number of participants in a meta-analysis); downgraded two steps for imprecision.

<sup>b</sup>Studies report inconsistent results regarding differences in treatment effects; downgraded one step for inconsistency.

<sup>c</sup>Studies do not meet optimal information size (i.e., number of participants in a meta-analysis); downgraded one step for imprecision.

<sup>d</sup>Two of three studies are high risk of bias.

<sup>e</sup>Study does not meet optimal information size (i.e., number of participants in a meta-analysis); downgraded two steps for imprecision.

years. More than one-third (36%) were Black or belonged to a minority ethnic group. Mean baseline BPD severity ranged from 40.7 points to 44.8 points on the BEST scale. Reasons for the high risk of bias included selection bias and confounding.

Detailed information on main study characteristics and treatment effects is presented in Appendix D. Table C-7 presents certainty-of-evidence ratings.

### **Severity of borderline personality disorder**

Treatment duration for both DBT and MBT was 12 months, and the study was funded through the United Kingdom's National Institute for Health (Barnicot and Crawford 2019). DBT included weekly individual therapy and group skills training, telephone skills coaching, and team consultation. MBT included weekly or fortnightly individual therapy and weekly group therapy along with a short-term, 10-week group program offering psychoeducation and support aimed at helping patients get a better understanding of their problems and suggestions for better ways of dealing with them.

At the end of the 12-month treatment phase, there was no significant difference in severity of BPD between DBT and MBT as measured by the BEST scale (Barnicot and Crawford 2019). There was significant improvement from baseline in both groups.

### **Severity of symptoms associated with borderline personality disorder**

At the end of the 12-month treatment phase, there was no significant difference between DBT and MBT in the number of self-harm incidents over the previous 3 months or in the number of dissociative symptoms and emotional dysregulation (Barnicot and Crawford 2019). Significant improvement from baseline in the severity of symptoms specific to BPD occurred in both groups.

### **Global impression and functioning**

The study did not look at global impression or functioning at follow-up.

### **Incidence of adverse events, serious adverse events, and withdrawal due to adverse events**

The study did not report on treatment-related adverse events, including withdrawal due to adverse events.

## **Dialectical Behavior Therapy Versus General Psychiatric Management for Borderline Personality Disorder**

One Canadian RCT (McMain et al. 2012; described in three publications), rated as having a high risk of bias, compared DBT with well-specified general psychiatric management (GPM) in 180 patients with BPD. The majority of participants were female (86%), with a mean age of 30 years. Race and ethnicity were not reported. Mean baseline BPD severity ranged from 14.9 points to 15.5 points on the ZAN-BPD. Reasons for high risk of bias included high attrition (38%) at 12 months.

Treatment duration was 12 months, and the study was funded through the Canadian Institutes for Health Research (McMain et al. 2012). DBT included weekly individual therapy and group skills training, weekly telephone coaching with explicit focus on self-harm and suicidal behavior, and weekly therapist team consultation. Manualized GPM consisted of weekly individual therapy that was expanded away from focusing on self-harm and suicidal behaviors and included medication management. Generalized psychiatric therapy also included mandated therapist supervision weekly meetings.

Detailed information on main study characteristics and treatment effects is presented in Appendix D. Table C-8 presents certainty-of-evidence ratings.

### **Severity of borderline personality disorder**

At the end of the 12-month treatment phase and again at the 36-month follow-up, there was no significant difference in severity of BPD on the ZAN-BPD among patients receiving DBT and those re-

**TABLE C-7. Certainty-of-evidence ratings of outcomes comparing MBT with DBT for BPD**

| Outcomes                                    | Participants, <i>N</i> (studies)          | Certainty of the evidence (GRADE)                    | Relative effect (95% CI) | Anticipated absolute effects        |                               |
|---------------------------------------------|-------------------------------------------|------------------------------------------------------|--------------------------|-------------------------------------|-------------------------------|
|                                             |                                           |                                                      |                          | Effect with DBT                     | Difference in effect with MBT |
| <b>Severity of BPD</b>                      |                                           |                                                      |                          |                                     |                               |
| Assessed with BEST<br>Follow-up: 12 months  | 90 (one nRCT: Barnicot and Crawford 2019) | ⊕○○○; VERY LOW <sup>a,b</sup><br>for similar effects | –                        | Mean score at endpoint=35.0         | Mean 0.8 higher (ns)          |
| <b>Dissociative experiences</b>             |                                           |                                                      |                          |                                     |                               |
| Assessed with DES<br>Follow-up: 12 months   | 90 (one nRCT: Barnicot and Crawford 2019) | ⊕○○○; VERY LOW <sup>a,b</sup><br>for similar effects | –                        | Mean score at endpoint=30.6         | Mean 4 lower (ns)             |
| <b>Emotional dysregulation</b>              |                                           |                                                      |                          |                                     |                               |
| Assessed with DERS<br>Follow-up: 12 months  | 90 (one nRCT: Barnicot and Crawford 2019) | ⊕○○○; VERY LOW <sup>a,b</sup><br>for similar effects | –                        | Mean score at endpoint=103.1 points | Mean 5.6 higher (ns)          |
| <b>Self-harm incidents</b>                  |                                           |                                                      |                          |                                     |                               |
| Assessed with SASII<br>Follow-up: 12 months | 90 (one nRCT: Barnicot and Crawford 2019) | ⊕○○○; VERY LOW <sup>a,b</sup><br>for similar effects | –                        | Median number at endpoint was 2.0   | Mean 10.5 more (ns)           |

BEST=Borderline Evaluation of Severity Over Time; BPD=borderline personality disorder; CI=confidence interval; DBT=dialectical behavior therapy; DERS=Difficulties in Emotion Regulation Scale; DES=Dissociative Experiences Scale; GRADE=Grading of Recommendations Assessment, Development, and Evaluation; MBT=mentalization-based treatment; nRCT=nonrandomized controlled trial; ns=not significant; SASII=Suicide Attempt Self-Injury Interview.

<sup>a</sup>High risk for bias in selection of participants into the study and high risk for confounding; downgraded one step for risk of bias.

<sup>b</sup>Study does not meet optimal information size (i.e., number of participants in a meta-analysis); downgraded two steps for imprecision.



**TABLE C-8. Certainty-of-evidence ratings of outcomes comparing DBT with GPM for BPD**

| Outcomes                                                   | Participants, <i>N</i> (studies)  | Certainty of the evidence (GRADE)                    | Relative effect (95% CI) | Anticipated absolute effects |                               |
|------------------------------------------------------------|-----------------------------------|------------------------------------------------------|--------------------------|------------------------------|-------------------------------|
|                                                            |                                   |                                                      |                          | Effect with GPM              | Difference in effect with DBT |
| <b>Severity of BPD</b>                                     |                                   |                                                      |                          |                              |                               |
| Assessed with ZAN-BPD<br>Follow-up: 36 months              | 180 (one RCT: McMain et al. 2012) | ⊕⊕○○; LOW <sup>a,b</sup> for similar effects         | –                        | Mean score at endpoint=6.66  | Mean 1.63 higher (ns)         |
| <b>Depression</b>                                          |                                   |                                                      |                          |                              |                               |
| Assessed with BDI<br>Follow-up: 36 months                  | 180 (one RCT: McMain et al. 2012) | ⊕⊕○○; LOW <sup>a,b</sup> for greater effect with GPM | –                        | Mean score at endpoint=18.05 | Mean 6.40 higher (P=0.004)    |
| <b>Interpersonal functioning</b>                           |                                   |                                                      |                          |                              |                               |
| Assessed with IIP<br>Follow-up: 36 months                  | 180 (one RCT: McMain et al. 2012) | ⊕⊕○○; LOW <sup>a,b</sup> for similar effects         | –                        | Mean score at endpoint=84.36 | Mean 10.12 higher (ns)        |
| <b>Nonsuicidal self-injuries</b>                           |                                   |                                                      |                          |                              |                               |
| Assessed with SASII<br>Follow-up: 36 months                | 180 (one RCT: McMain et al. 2012) | ⊕⊕○○; LOW <sup>a,b</sup> for similar effects         | –                        | Mean number at endpoint=1.09 | Mean 1.09 more (ns)           |
| <b>Suicidal episodes</b>                                   |                                   |                                                      |                          |                              |                               |
| Assessed with SASII<br>Follow-up: 36 months                | 180 (one RCT: McMain et al. 2012) | ⊕⊕○○; LOW <sup>a,b</sup> for similar effects         | –                        | Mean number at endpoint=0.29 | Mean 0.26 more (ns)           |
| <b>Symptom distress</b>                                    |                                   |                                                      |                          |                              |                               |
| Assessed with SCL-90-R total score<br>Follow-up: 36 months | 180 (one RCT: McMain et al. 2012) | ⊕⊕○○; LOW <sup>a,b</sup> for similar effects         | –                        | Mean score at endpoint=1.03  | Mean 0.23 higher (ns)         |

BDI=Beck Depression Inventory; BPD=borderline personality disorder; CI=confidence interval; DBT=dialectical behavior therapy; GPM=general psychiatric management; GRADE=Grading of Recommendations Assessment, Development, and Evaluation; IIP=Inventory of Interpersonal Problems; ns=not significant; RCT=randomized controlled trial; SASII=Suicide Attempt Self-Injury Interview; SCL-90-R=Symptom Checklist-90-Revised; ZAN-BPD=Zanarini Rating Scale for BPD.

<sup>a</sup>High risk of bias due to attrition; downgraded one step for risk of bias.

<sup>b</sup>Study does not meet optimal information size (i.e., number of participants in a meta-analysis); downgraded one step for imprecision.

ceiving GPM (McMain et al. 2012). There was significant improvement from baseline in both groups.

### **Severity of symptoms associated with borderline personality disorder**

With respect to symptoms specific to BPD, after 12 months of treatment and at the 36-month follow-up, there were no significant differences between DBT and GPM across multiple measures of symptom severity, including the number of suicidal episodes and the number of nonsuicidal self-injuries as measured on the Suicide Attempt Self-Injury Interview and improvement on the Inventory of Interpersonal Problems scale (McMain et al. 2012). With respect to depression, there was no significant difference between groups in BDI scores at the end of the 12-month treatment phase. However, at 36 months (24 months post-treatment), mean BDI scores were significantly lower among patients in the GPM group than in the DBT group.

### **Global impression and functioning**

The study reported no significant differences between treatment groups on the SCL-90-R and the Inventory of Interpersonal Problems (McMain et al. 2012).

### **Incidence of adverse events, serious adverse events, and withdrawal due to adverse events**

The study did not report on treatment-related adverse events including withdrawal due to adverse events.

## **Dialectical Behavior Therapy Versus Systems Training for Emotional Predictability and Problem-Solving**

One nonrandomized clinical trial (Guillén Botella et al. 2021) conducted in Spain, rated as having a high risk of bias, compared DBT with Systems Training for Emotional Predictability and Problem-Solving (STEPPS) in 72 patients with BPD. The overwhelming majority of participants were female (94%), and all were White, with a mean age of 32 years. Mean baseline BPD severity ranged from 35.8 points to 38.6 points on the BSL-23. The study was rated as having a high risk of bias due to high attrition (32%).

Treatment duration was 6 months (Guillén Botella et al. 2021). DBT included weekly individual therapy and group skills training, telephone skills coaching, and team consultation. STEPPS included group therapy, a reinforcement team, telephone consultations with relatives, consultations with other professionals, and weekly clinician meetings. The study funding source was not reported.

Detailed information on main study characteristics and treatment effects is presented in Appendix D. Table C-9 presents certainty-of-evidence ratings.

### **Severity of borderline personality disorder**

At the end of a 6-month treatment phase, compared with STEPPS, DBT resulted in a greater improvement in BPD symptom severity with significantly lower scores on the BSL-23 scale (Guillén Botella et al. 2021). Both DBT and STEPPS resulted in a significant improvement in BPD severity from baseline.

### **Severity of symptoms associated with borderline personality disorder**

Following 6 months of treatment, there was no significant difference between DBT and STEPPS in suicide risk, depression, anxiety, dissociation experiences, and resilience scores (Guillén Botella et al. 2021). Severity of symptoms decreased across both groups.

**TABLE C-9. Certainty-of-evidence ratings of outcomes comparing DBT with STEPPS**

| Outcomes                                                            | Participants, <i>N</i> ( <i>studies</i> )  | Certainty of the evidence (GRADE)                            | Anticipated absolute effects |                              |                                    |
|---------------------------------------------------------------------|--------------------------------------------|--------------------------------------------------------------|------------------------------|------------------------------|------------------------------------|
|                                                                     |                                            |                                                              | Relative effect (95% CI)     | Effect with DBT              | Difference in effect with STEPPS   |
| <b>Severity of BPD</b>                                              |                                            |                                                              |                              |                              |                                    |
| Assessed with BSL-23<br>Follow-up: 6 months                         | 72 (one nRCT: Guillén Botella et al. 2021) | ⊕○○○; VERY LOW <sup>a,b</sup><br>for greater effect with DBT | –                            | Mean score at endpoint=23.56 | Mean 5.73 higher ( <i>P</i> =0.03) |
| <b>Anxiety</b>                                                      |                                            |                                                              |                              |                              |                                    |
| Assessed with severity of participants index<br>Follow-up: 6 months | 72 (one nRCT: Guillén Botella et al. 2021) | ⊕○○○; VERY LOW <sup>a,b</sup><br>for similar effects         | –                            | Mean score at endpoint=8.40  | Mean 0.71 higher (ns)              |
| <b>Depression</b>                                                   |                                            |                                                              |                              |                              |                                    |
| Assessed with BDI<br>Follow-up: 6 months                            | 72 (one nRCT: Guillén Botella et al. 2021) | ⊕○○○; VERY LOW <sup>a,b</sup><br>for similar effects         | –                            | Mean score at endpoint=28.03 | Mean 6.7 lower (ns)                |
| <b>Dissociation experiences</b>                                     |                                            |                                                              |                              |                              |                                    |
| Assessed with DES-II<br>Follow-up: 6 months                         | 72 (one nRCT: Guillén Botella et al. 2021) | ⊕○○○; VERY LOW <sup>a,b</sup><br>for similar effects         | –                            | Mean score at endpoint=20.81 | Mean 2.8 lower (ns)                |
| <b>Suicide risk</b>                                                 |                                            |                                                              |                              |                              |                                    |
| Assessed with SRS<br>Follow-up: 6 months                            | 72 (one nRCT: Guillén Botella et al. 2021) | ⊕○○○; VERY LOW <sup>a,b</sup><br>for similar effects         | –                            | Mean score at endpoint=7.0   | Mean 1.56 higher (ns)              |
| <b>Quality of life</b>                                              |                                            |                                                              |                              |                              |                                    |
| Assessed with QoL<br>Follow-up: 6 months                            | 72 (one nRCT: Guillén Botella et al. 2021) | ⊕○○○; VERY LOW <sup>a,b</sup><br>for similar effects         | –                            | Mean score at endpoint=6.31  | Mean 1.16 lower (ns)               |

BDI=Beck Depression Inventory; BPD=borderline personality disorder; BSL-23=Borderline Symptom List-23; CI=confidence interval; DBT=dialectical behavior therapy; DES-II=Dissociative Experiences Scale-II; GRADE=Grading of Recommendations Assessment, Development, and Evaluation; nRCT=nonrandomized controlled trial; ns=not significant; QoL=Quality of Life Index; SRS=Suicide Risk Scale; STEPPS=Systems Training for Emotional Predictability and Problem-Solving.

<sup>a</sup>High risk of bias due to high attrition and moderate for confounding; downgraded one step for risk of bias.

<sup>b</sup>Study does not meet optimal information size (i.e., number of participants in a meta-analysis); downgraded two steps for imprecision.

## **Global impression and functioning**

Following 6 months of treatment, there was no significant difference between STEPPS and DBT on quality-of-life scores (Guillén Botella et al. 2021).

## **Incidence of adverse events, serious adverse events, and withdrawal due to adverse events**

The study did not report treatment-related adverse events, including withdrawal due to adverse events.

## Dialectical Behavior Therapy Versus Dynamic Deconstructive Psychotherapy

One three-armed retrospective cohort study (Gregory and Sachdeva 2016; reported in two publications), conducted in the United States and rated as having a high risk of bias, compared DBT with dynamic deconstructive psychotherapy (DDP) and TAU in 68 patients with BPD. The majority of participants were female (81%) and White (88%), with a mean age of 31 years. Mean baseline BPD severity ranged from 45.5 points to 49.2 points on the BEST scale. Reasons for the rating of high risk of bias included high attrition (53%) and confounding.

Treatment duration for both DBT ( $N=25$ ) and DDP ( $N=27$ ) was 12 months (Gregory and Sachdeva 2016). DBT included weekly individual therapy, weekly group sessions, and telephone skills coaching. DDP included weekly individual sessions that combined elements of translational neuroscience, object relations theory, and deconstructionist philosophy. The study was supported by the American Psychoanalytic Association.

Detailed information on main study characteristics and treatment effects is presented in Appendix D. Table C-10 presents certainty-of-evidence ratings.

## **Severity of borderline personality disorder**

At the end of a 12-month treatment phase, participants receiving DDP achieved significantly greater reductions on the BEST scale compared with participants receiving DBT (Gregory and Sachdeva 2016). Both DBT and DDP resulted in a significant improvement in BPD severity from baseline.

## **Severity of symptoms associated with borderline personality disorder**

Following 12 months of treatment, reductions in self-harm, as measured on the Suicidal Behaviors Questionnaire, and improvements in depression scores on the BDI were significantly greater among patients receiving DDP than for those receiving DBT (Gregory and Sachdeva 2016). There was no difference at 12 months between DDP and DBT in reported suicide attempts.

## **Global impression and functioning**

At 12 months, DDP resulted in significant greater improvement in disability with significantly lower scores on the Sheehan Disability Scale compared with DBT (Gregory and Sachdeva 2016).

## **Incidence of adverse events, serious adverse events, and withdrawal due to adverse events**

The study did not report treatment-related adverse events including withdrawal due to adverse events.

## Dialectical Behavior Therapy Versus Transference-Focused Psychotherapy Versus Supportive Therapy

One three-armed RCT (Clarkin et al. 2007), rated as having a high risk of bias and conducted in the United States, compared DBT with transference-focused psychotherapy (TFP) and supportive ther-

**TABLE C-10. Certainty-of-evidence ratings of outcomes comparing DBT with DDP for BPD**

| Outcomes                                   | Participants, <i>N</i> (studies)                            | Certainty of the evidence (GRADE)                               | Relative effect (95% CI) | Anticipated absolute effects   |                                       |
|--------------------------------------------|-------------------------------------------------------------|-----------------------------------------------------------------|--------------------------|--------------------------------|---------------------------------------|
|                                            |                                                             |                                                                 |                          | Effect with DBT                | Difference in effect with DDP         |
| <b>Severity of BPD</b>                     |                                                             |                                                                 |                          |                                |                                       |
| Assessed with BEST<br>Follow-up: 12 months | 52 (one observational study:<br>Gregory and Sachdeva 2016)  | ⊕○○○; VERY LOW <sup>a,b</sup><br>for greater effect with<br>DDP | –                        | Mean score at<br>endpoint=41.8 | Mean 8.8 lower ( <i>P</i> =0.04)      |
| <b>Depression</b>                          |                                                             |                                                                 |                          |                                |                                       |
| Assessed with BDI<br>Follow-up: 12 months  | 52 (one observational study:<br>(Gregory and Sachdeva 2016) | ⊕○○○; VERY LOW <sup>a,b</sup><br>for greater effect with<br>DDP | –                        | Mean score at<br>endpoint=27.6 | Mean 10.5 lower<br>( <i>P</i> =0.009) |
| <b>Disability</b>                          |                                                             |                                                                 |                          |                                |                                       |
| Assessed with SDS<br>Follow-up: 12 months  | 52 (one observational study:<br>Gregory and Sachdeva 2016)  | ⊕○○○; VERY LOW <sup>a,b</sup><br>for greater effect with<br>DDP | –                        | Mean score at<br>endpoint=6.1  | Mean 2.3 lower ( <i>P</i> =0.049)     |
| <b>Self-harm</b>                           |                                                             |                                                                 |                          |                                |                                       |
| Follow-up: 12 months                       | 52 (one observational study:<br>Gregory and Sachdeva 2016)  | ⊕○○○; VERY LOW <sup>a,b</sup><br>for greater effect with<br>DDP | –                        | Mean number at<br>endpoint=2.4 | Mean 1.1 fewer ( <i>P</i> =0.02)      |
| <b>Suicide attempts</b>                    |                                                             |                                                                 |                          |                                |                                       |
| Follow-up: 12 months                       | 52 (one observational study:<br>Gregory and Sachdeva 2016)  | ⊕○○○; VERY LOW <sup>a,b</sup><br>for similar effects            | –                        | Mean number at<br>endpoint=1.3 | Mean 0.74 fewer (ns)                  |

BDI=Beck Depression Inventory; BEST=Borderline Evaluation of Severity Over Time; BPD=borderline personality disorder; CI=confidence interval; DBT=dialectical behavior therapy; DDP=dynamic deconstructive psychotherapy; GRADE=Grading of Recommendations Assessment, Development, and Evaluation; ns=not significant; SBQ=Suicidal Behaviors Questionnaire; SDS=Sheehan Disability Scale.

<sup>a</sup>High risk of bias due to confounding and attrition; downgraded one step due to risk of bias.

<sup>b</sup> Study does not meet optimal information size (i.e., number of participants in a meta-analysis); downgraded two steps for imprecision.

apy in 90 patients with BPD and reported results for patients for whom they had at least three data points ( $N=62$ ). The majority of participants were female (92%), White (68%), and with a mean age of 31 years. Mean baseline BPD severity was not reported. We rated the study as having high risk of bias due to the randomization process and high attrition (31%). Treatment duration was 12 months. DBT included weekly individual therapy, weekly group sessions, and telephone skills coaching. TFP included two individual weekly sessions focused primarily on the dominant affect-laden themes that emerge in the patient-therapist relationship. Supportive treatment included one weekly session supplemented with additional sessions as needed. The study was supported by the Borderline Personality Disorder Research Foundation.

Detailed information on main study characteristics and treatment effects is presented in Appendix D. Table C–11, Table C–12, and Table C–13 present certainty-of-evidence ratings for the different comparisons.

### **Severity of borderline personality disorder**

The study did not report on severity of BPD.

### **Severity of symptoms associated with borderline personality disorder**

Following 12 months of treatment, there was a reduction in suicidal behavior (compared with baseline) among patients receiving DBT and TFP but not among those receiving supportive therapy (Clarkin et al. 2007). However, there was no significant difference between DBT, TFP, and supportive therapy. There was also no significant difference between treatment groups on the BDI.

### **Global impression and functioning**

Following 12 months of treatment, patients exhibited no significant differences between DBT, TFP, and supportive therapy on the GAF scale or the Brief Symptom Inventory for anxiety (data not provided) (Clarkin et al. 2007).

### **Incidence of adverse events, serious adverse events, and withdrawal due to adverse events**

The study did not report treatment-related adverse events including withdrawal due to adverse events.

## **Dialectical Behavior Therapy Components Versus Other Components of Dialectical Behavior Therapy**

DBT is a multifaceted cognitive-behavioral treatment approach that includes individual therapy, group skills training, telephone coaching, and a consultation team meeting for therapists. Three studies (one nonrandomized clinical trial [Andión et al. 2012], one RCT [Linehan et al. 2015], one prospective cohort study [Lyng et al. 2020]) assessed the comparative value of individual therapy components of DBT. Together, these studies provided data on 238 participants. One study (Andión et al. 2012) compared the individual therapy component of DBT with combined individual and group therapy. Another (Lyng et al. 2020) compared the stand-alone group skills component with 6 months of the full four-component DBT program. A third three-armed study (Linehan et al. 2015) compared 12 months of standard DBT (i.e., the full four-component program) with stand-alone group skills training and individual therapy with an activities group. All three studies were rated as having a high risk of bias. Reasons for ratings of high risk of bias included high overall attrition or high differential attrition, bias due to deviations from the intended intervention, and bias due to confounding (Andión et al. 2012; Linehan et al. 2015; Lyng et al. 2020).

The majority of participants were female, with a mean age across studies ranging from 26 years to 33 years. Race was reported in just one of three studies, in which more than 70% of participants were White (Linehan et al. 2015). Two studies were conducted in Europe (Andión et al. 2012; Lyng

**TABLE C–11. Certainty-of-evidence ratings of outcomes comparing DBT with TFP for BPD**

| Outcomes                                    | Participants, <i>N</i> ( <i>studies</i> ) | Certainty of the evidence (GRADE)                    | Anticipated absolute effects |                              |                               |
|---------------------------------------------|-------------------------------------------|------------------------------------------------------|------------------------------|------------------------------|-------------------------------|
|                                             |                                           |                                                      | Relative effect (95% CI)     | Effect with TFP              | Difference in effect with DBT |
| <b>Anxiety</b>                              |                                           |                                                      |                              |                              |                               |
| Assessed with BSI<br>Follow-up: 12 months   | 40 (one RCT: Clarkin et al. 2007)         | ⊕○○○; VERY LOW <sup>a,b</sup><br>for similar effects | –                            | Mean score at<br>endpoint=NR | NR (ns)                       |
| <b>Depression</b>                           |                                           |                                                      |                              |                              |                               |
| Assessed with BDI<br>Follow-up: 12 months   | 40 (one RCT: Clarkin et al. 2007)         | ⊕○○○; VERY LOW <sup>a,b</sup><br>for similar effects | –                            | Mean score at<br>endpoint=NR | NR (ns)                       |
| <b>Suicidal behaviors</b>                   |                                           |                                                      |                              |                              |                               |
| Assessed with OAS-M<br>Follow-up: 12 months | 40 (one RCT: Clarkin et al. 2007)         | ⊕○○○; VERY LOW <sup>a,b</sup><br>for similar effects | –                            | Mean score at<br>endpoint=NR | NR (ns)                       |
| <b>Global functioning</b>                   |                                           |                                                      |                              |                              |                               |
| Assessed with GAF<br>Follow-up: 12 months   | 40 (one RCT: Clarkin et al. 2007)         | ⊕○○○; VERY LOW <sup>a,b</sup><br>for similar effects | –                            | Mean score at<br>endpoint=NR | NR (ns)                       |

BDI=Beck Depression Inventory; BPD=borderline personality disorder; BSI=Brief Symptom Inventory; CI=confidence interval; DBT=dialectical behavior therapy; GAF=Global Assessment of Functioning; GRADE=Grading of Recommendations Assessment, Development, and Evaluation; NR=not reported; ns=not significant; OAS-M=Overt Aggression Scale-Modified; RCT=randomized controlled trial; TFP=transference-focused psychotherapy.

<sup>a</sup>High risk of bias due to improper randomization and high attrition; downgraded one step for risk of bias.

<sup>b</sup>Study does not meet optimal information size (i.e., number of participants in a meta-analysis); downgraded two steps for imprecision.

**TABLE C-12. Certainty-of-evidence ratings of outcomes comparing DBT with supportive therapy for BPD**

| Outcomes                                    | Participants, <i>N</i> (studies)  | Certainty of the evidence (GRADE)                    | Relative effect (95% CI) | Anticipated absolute effects   |                               |
|---------------------------------------------|-----------------------------------|------------------------------------------------------|--------------------------|--------------------------------|-------------------------------|
|                                             |                                   |                                                      |                          | Effect with supportive therapy | Difference in effect with DBT |
| <b>Anxiety</b>                              |                                   |                                                      |                          |                                |                               |
| Assessed with BSI<br>Follow-up: 12 months   | 39 (one RCT: Clarkin et al. 2007) | ⊕○○○; VERY LOW <sup>a,b</sup><br>for similar effects | –                        | Mean score at<br>endpoint=NR   | NR (ns)                       |
| <b>Depression</b>                           |                                   |                                                      |                          |                                |                               |
| Assessed with BDI<br>Follow-up: 12 months   | 39 (one RCT: Clarkin et al. 2007) | ⊕○○○; VERY LOW <sup>a,b</sup><br>for similar effects | –                        | Mean score at<br>endpoint=NR   | NR (ns)                       |
| Global functioning                          |                                   |                                                      |                          |                                |                               |
| Assessed with GAF<br>Follow-up: 12 months   | 39 (one RCT: Clarkin et al. 2007) | ⊕○○○; VERY LOW <sup>a,b</sup><br>for similar effects | –                        | Mean score at<br>endpoint=NR   | NR (ns)                       |
| <b>Suicidal behaviors</b>                   |                                   |                                                      |                          |                                |                               |
| Assessed with OAS-M<br>Follow-up: 12 months | 39 (one RCT: Clarkin et al. 2007) | ⊕○○○; VERY LOW <sup>a,b</sup><br>for similar effects | –                        | Mean score at<br>endpoint=NR   | NR (ns)                       |

BDI=Beck Depression Inventory; BPD=borderline personality disorder; BSI=Brief Symptom Inventory; CI=confidence interval; DBT=dialectical behavior therapy; GAF=Global Assessment of Functioning; GRADE=Grading of Recommendations Assessment, Development, and Evaluation; NR=not reported; ns=not significant; OAS-M=Overt Aggression Scale-Modified; RCT=randomized controlled trial.

<sup>a</sup>High risk of bias due to improper randomization and high attrition; downgraded one step for risk of bias.

<sup>b</sup>Study does not meet optimal information size (i.e., number of participants in a meta-analysis); downgraded two steps for imprecision.



**TABLE C-13. Certainty-of-evidence ratings of outcomes comparing TFP with supportive therapy for BPD**

| Outcomes                                    | Participants, <i>N</i> ( <i>studies</i> ) | Certainty of the evidence (GRADE)                    | Anticipated absolute effects |                              |                                              |
|---------------------------------------------|-------------------------------------------|------------------------------------------------------|------------------------------|------------------------------|----------------------------------------------|
|                                             |                                           |                                                      | Relative effect (95% CI)     | Effect with TFP              | Difference in effect with supportive therapy |
| <b>Anxiety</b>                              |                                           |                                                      |                              |                              |                                              |
| Assessed with BSI<br>Follow-up: 12 months   | 45 (one RCT: Clarkin et al. 2007)         | ⊕○○○; VERY LOW <sup>a,b</sup><br>for similar effects | –                            | Mean score at<br>endpoint=NR | NR (ns)                                      |
| <b>Depression</b>                           |                                           |                                                      |                              |                              |                                              |
| Assessed with BDI<br>Follow-up: 12 months   | 45 (one RCT: Clarkin et al. 2007)         | ⊕○○○; VERY LOW <sup>a,b</sup><br>for similar effects | –                            | Mean score at<br>endpoint=NR | NR (ns)                                      |
| <b>Global functioning</b>                   |                                           |                                                      |                              |                              |                                              |
| Assessed with GAF<br>Follow-up: 12 months   | 45 (one RCT: Clarkin et al. 2007)         | ⊕○○○; VERY LOW <sup>a,b</sup><br>for similar effects | –                            | Mean score at<br>endpoint=NR | NR (ns)                                      |
| <b>Suicidal behaviors</b>                   |                                           |                                                      |                              |                              |                                              |
| Assessed with OAS-M<br>Follow-up: 12 months | 45 (one RCT: Clarkin et al. 2007)         | ⊕○○○; VERY LOW <sup>a,b</sup><br>for similar effects | –                            | Mean score at<br>endpoint=NR | NR (ns)                                      |

BDI=Beck Depression Inventory; BPD=borderline personality disorder; BSI=Brief Symptom Inventory; CI=confidence interval; GAF=Global Assessment of Functioning; GRADE=Grading of Recommendations Assessment, Development, and Evaluation; NR=not reported; ns=not significant; OAS-M=Overt Aggression Scale–Modified; RCT=randomized controlled trial; TFP=transference-focused psychotherapy.

<sup>a</sup>High risk of bias due to improper randomization and high attrition; downgraded one step for risk of bias.

<sup>b</sup>Study does not meet optimal information size (i.e., number of participants in a meta-analysis); downgraded two steps for imprecision.

et al. 2020) and one in the United States (Linehan et al. 2015). Just one study provided baseline information on BPD severity, reporting a mean score on the BSL-23 of 2.7 points (Lyng et al. 2020). Treatment durations ranged from 6 months (Lyng et al. 2020) to 1 year (Andión et al. 2012; Linehan et al. 2015). One study followed patients through 18 months (6 months after the end of the intervention) (Andión et al. 2012), and another study followed patients through 2 years (12 months following the end of treatment) (Linehan et al. 2015). Studies were generally funded by public funds with no commercial funding.

Detailed information on main study characteristics and treatment effects is presented in Appendix D. Table C-14, Table C-15, and Table C-16 present certainty-of-evidence ratings for different comparisons.

### **Severity of borderline personality disorder**

One prospective cohort study (Lyng et al. 2020), rated as having a high risk of bias, assessed improvements in the severity of BPD. The study, which included 88 participants, reported no clinical improvements in BSL-23 scores among patients receiving 6 months of stand-alone DBT skills training or 6 months of the full four-component DBT program and no significant difference between the groups. There were several serious limitations to the study, including that high-risk patients (defined as those with a suicide attempt and/or deliberate self-harm that had required treatment by a physician in the previous 6 months) were excluded from the DBT skills training group but not from the full DBT group.

### **Severity of symptoms associated with borderline personality disorder**

Three studies (Andión et al. 2012; Linehan et al. 2015; Lyng et al. 2020) investigating individual components of DBT assessed changes in the severity of symptoms associated with BPD, and all reported no significant differences between groups regarding reduction in suicide attempts and improvements in self-harm acts and suicidal ideation. One study (Linehan et al. 2015) found a significant improvement in Hamilton Rating Scale for Depression scores at the end of 1-year treatment among participants receiving standard DBT and the group skills component of DBT versus those receiving only the individual therapy component of DBT ( $P=0.02$ ). There were no differences in anxiety scores at the end of the 1-year treatment phase (Linehan et al. 2015).

### **Global impression and functioning**

The study by Lyng et al. (2020;  $N=88$ ), rated as having a high risk of bias, comparing 6 months of stand-alone DBT skills training with 6 months of the full four-component DBT program reported no significant difference between groups on the Global Severity Index of the SCL-90-R.

### **Incidence of adverse events, serious adverse events, and withdrawal due to adverse events**

No studies reported on treatment-related adverse events including withdrawal due to adverse events.

## **Dialectical Behavior Therapy Versus Community Therapy by Experts**

One RCT ( $N=111$ ) (Linehan et al. 2006), rated as having a high risk of bias, compared DBT with community therapy offered by nonbehavioral psychotherapy experts over 1 year. All participants were female, with a mean age of 29 years, who had at least two suicide attempts; the majority were White (87%). The severity of BPD at baseline was not reported.

We rated the study as having a high risk of bias because of lack of intention-to-treat analysis. The follow-up duration was 2 years, and the study was funded by the National Institute of Mental Health (Linehan et al. 2006).

The intervention group received standard DBT for 1 year, including weekly individual psychotherapy sessions, weekly group skills training, and telephone consultation as needed (Linehan et

**TABLE C-14. Certainty-of-evidence ratings of outcomes comparing DBT group skills training with standard DBT for BPD**

| Outcomes                                                    | Participants, <i>N</i> ( <i>studies</i> )                                     | Certainty of the evidence (GRADE)                    | Anticipated absolute effects |                                  |                                                     |
|-------------------------------------------------------------|-------------------------------------------------------------------------------|------------------------------------------------------|------------------------------|----------------------------------|-----------------------------------------------------|
|                                                             |                                                                               |                                                      | Relative effect (95% CI)     | Effect with standard DBT         | Difference in effect with DBT group skills training |
| <b>Severity of BPD</b>                                      |                                                                               |                                                      |                              |                                  |                                                     |
| Assessed with BSL-23<br>Follow-up: mean 6 months            | 88 (one observational study: Lyng et al. 2020)                                | ⊕○○○; VERY LOW <sup>a,b</sup><br>for similar effects | –                            | Mean score at endpoint=2.56      | Mean 0.51 lower (ns)                                |
| <b>Self-harm acts (NSSI)</b>                                |                                                                               |                                                      |                              |                                  |                                                     |
| Assessed with SASII<br>Follow-up: mean 2 years              | 66 (one RCT: Linehan et al. 2015)                                             | ⊕○○○; VERY LOW <sup>b,c</sup><br>for similar effects | –                            | Mean number at endpoint=7.9      | Mean 1.5 more (ns)                                  |
| <b>Suicidal ideation</b>                                    |                                                                               |                                                      |                              |                                  |                                                     |
| Assessed with SBQ and BSS<br>Follow-up: 6 months to 2 years | 154 (one RCT, one observational study: Linehan et al. 2015; Lyng et al. 2020) | ⊕○○○; VERY LOW <sup>b,c</sup><br>for similar effects | –                            | Not estimable (different scales) | Mean 4.1 to mean 7.7 lower (ns)                     |
| <b>Suicide attempts</b>                                     |                                                                               |                                                      |                              |                                  |                                                     |
| Assessed with SASII<br>Follow-up: mean 2 years              | 66 (one RCT: Linehan et al. 2015)                                             | ⊕○○○; VERY LOW <sup>b,c</sup><br>for similar effects | –                            | Mean number at endpoint=2.0      | Mean 0.5 fewer (ns)                                 |
| <b>General psychopathology</b>                              |                                                                               |                                                      |                              |                                  |                                                     |
| Assessed with SCL-90<br>Follow-up: mean 6 months            | 88 (one observational study: Lyng et al. 2020)                                | ⊕○○○; VERY LOW <sup>a,b</sup><br>for similar effects | –                            | Mean score at endpoint=2.09      | Mean 0.32 lower (ns)                                |

BPD=borderline personality disorder; BSL-23=Borderline Symptom List-23; BSS=Beck Scale for Suicide Ideation; CI=confidence interval; DBT=dialectical behavior therapy; GRADE=Grading of Recommendations Assessment, Development, and Evaluation; ns=not significant; NSSI=nonsuicidal self-injury; RCT=randomized controlled trial; SASII=Suicide Attempt Self-Injury Interview; SBQ=Suicidal Behaviors Questionnaire; SCL-90=Symptom Checklist-90.

<sup>a</sup>High risk of bias due to attrition, confounding, and selection bias; downgraded two steps for risk of bias.

<sup>b</sup>Study does not meet optimal information size (i.e., number of participants in a meta-analysis); downgraded two steps for imprecision.

<sup>c</sup>High risk of bias due to deviations from intended intervention and attrition; downgraded one step for risk of bias.

**TABLE C-15. Certainty-of-evidence ratings of outcomes comparing individual DBT with standard DBT for BPD**

| Outcomes                                                  | Participants, <i>N</i> (studies)  | Certainty of the evidence (GRADE)                            | Relative effect (95% CI) | Anticipated absolute effects |                                                  |
|-----------------------------------------------------------|-----------------------------------|--------------------------------------------------------------|--------------------------|------------------------------|--------------------------------------------------|
|                                                           |                                   |                                                              |                          | Effect with standard DBT     | Difference in effect with individual DBT therapy |
| <b>Anxiety</b>                                            |                                   |                                                              |                          |                              |                                                  |
| Assessed with Ham-A<br>Follow-up: end of 1-year treatment | 66 (one RCT: Linehan et al. 2015) | ⊕○○○; VERY LOW <sup>a,b</sup><br>for similar effects         | –                        | Mean score at endpoint=17.2  | Mean 7.1 higher (ns)                             |
| <b>Depression</b>                                         |                                   |                                                              |                          |                              |                                                  |
| Assessed with Ham-D<br>Follow-up: end of 1-year treatment | 66 (one RCT: Linehan et al. 2015) | ⊕○○○; VERY LOW <sup>a,b</sup><br>for greater effect with DBT | –                        | Mean score at endpoint=12.3  | Mean 5.9 higher ( <i>P</i> =0.03)                |
| <b>Self-harm acts (NSSI)</b>                              |                                   |                                                              |                          |                              |                                                  |
| Assessed with SASII<br>Follow-up: 2 years                 | 66 (one RCT: Linehan et al. 2015) | ⊕○○○; VERY LOW <sup>a,b</sup><br>for similar effects         | –                        | Mean number at endpoint=7.9  | Mean 8.1 more (ns)                               |
| <b>Suicidal ideation</b>                                  |                                   |                                                              |                          |                              |                                                  |
| Assessed with SBQ<br>Follow-up: 2 years                   | 66 (one RCT: Linehan et al. 2015) | ⊕○○○; VERY LOW <sup>a,b</sup><br>for similar effects         | –                        | Mean score at endpoint=28.9  | Mean 3.4 lower (ns)                              |
| <b>Suicide attempts</b>                                   |                                   |                                                              |                          |                              |                                                  |
| Assessed with SASII<br>Follow-up: mean 2 years            | 66 (one RCT: Linehan et al. 2015) | ⊕○○○; VERY LOW <sup>a,b</sup><br>for similar effects         | –                        | Mean number at endpoint=2.0  | Mean 1.6 more (ns)                               |

BPD=borderline personality disorder; CI=confidence interval; DBT=dialectical behavior therapy; GRADE=Grading of Recommendations Assessment, Development, and Evaluation; Ham-A=Hamilton Rating Scale for Anxiety; Ham-D=Hamilton Rating Scale for Depression; ns=not significant; NSSI=nonsuicidal self-injury; RCT=randomized controlled trial; SASII=Suicide Attempt Self-Injury Interview; SBQ=Suicidal Behaviors Questionnaire.

<sup>a</sup>High risk of bias due to deviations from intended intervention and attrition; downgraded one step due to risk of bias.

<sup>b</sup>Study does not meet optimal information size (i.e., number of participants in a meta-analysis); downgraded two steps for imprecision.

**TABLE C–16. Certainty-of-evidence ratings of outcomes comparing combined individual plus group DBT with individual DBT for BPD**

| Outcomes                   | Participants, <i>N</i> ( <i>studies</i> ) | Certainty of the evidence (GRADE)                    | Relative effect (95% CI) | Anticipated absolute effects       |                                                                      |
|----------------------------|-------------------------------------------|------------------------------------------------------|--------------------------|------------------------------------|----------------------------------------------------------------------|
|                            |                                           |                                                      |                          | Effect with individual DBT therapy | Difference in effect with combined individual plus group therapy DBT |
| <b>Self-harm behaviors</b> |                                           |                                                      |                          |                                    |                                                                      |
| Follow-up: 18 months       | 51 (one nRCT: Andi3n et al. 2012)         | ⊕○○○; VERY LOW <sup>a,b</sup><br>for similar effects | –                        | Mean number at endpoint=22         | Mean 13 fewer (ns)                                                   |
| <b>Suicide attempts</b>    |                                           |                                                      |                          |                                    |                                                                      |
| Follow-up: 18 months       | 51 (one nRCT: Andi3n et al. 2012)         | ⊕○○○; VERY LOW <sup>a,b</sup><br>for similar effects | –                        | Mean number at endpoint=14         | Mean 8 fewer (ns)                                                    |

BPD=borderline personality disorder; CI=confidence interval; DBT=dialectical behavior therapy; GRADE=Grading of Recommendations Assessment, Development, and Evaluation; NR=not reported; nRCT=nonrandomized controlled trial; ns=not significant.

<sup>a</sup>High risk of bias due to deviations from intended intervention; downgraded one step due to risk of bias.

<sup>b</sup>Study does not meet optimal information size (i.e., number of participants in a meta-analysis); downgraded two steps for imprecision.

al. 2006). Community treatment by experts involved selected psychotherapists who were matched with therapists administering DBT by controlling for sex, availability, expertise, allegiance, training, and experience.

Detailed information on main study characteristics and treatment effects is presented in Appendix D. Table C-17 presents certainty-of-evidence ratings.

### **Severity of borderline personality disorder**

The study did not report on severity of BPD.

### **Severity of symptoms associated with borderline personality disorder**

At the end of the treatment period (12 months) and after the 2-year follow-up, participants in the DBT group had significantly fewer suicide attempts and emergency department visits or hospital admissions because of suicidal ideation and behavior (Linehan et al. 2006).

No significant differences between treatment groups were apparent for self-harm and depressive symptoms (Linehan et al. 2006).

### **Global impression and functioning**

The study did not report on global impression and functioning.

### **Incidence of adverse events, serious adverse events, and withdrawal due to adverse events**

The study did not report on the incidence of adverse events, serious adverse events, or withdrawal due to adverse events.

## **Dynamic Deconstructive Psychotherapy Versus Treatment as Usual**

A retrospective cohort study (Gregory and Sachdeva 2016) evaluated the efficacy of DDP compared with TAU. The study provided data on 44 participants. The study was rated as having a high risk of bias because of confounding and attrition. The follow-up duration was 12 months, and the study was funded by the American Psychoanalytic Association. The majority of the study participants were female and White, and the mean age was 28 years. This study reported baseline BEST scores ranging from 46 to 49. The study excluded patients with schizophrenia, intellectual disabilities, or dementia.

DDP involved weekly individual sessions over a 12-month period and combined elements of translational neuroscience, object relations theory, and deconstruction philosophy (Gregory and Sachdeva 2016). TAU consisted of unstructured psychotherapy.

Detailed information on main study characteristics and treatment effects is presented in Appendix D. Table C-18 presents certainty-of-evidence ratings.

### **Severity of borderline personality disorder**

At the 1-year follow-up, the study found that participants in the DDP group had significant improvements in the differences on the BEST scale when compared with the TAU group (Gregory and Sachdeva 2016).

### **Severity of symptoms associated with borderline personality disorder**

The study reported no significant differences in the mean number of self-injuries or suicide attempts but did report significant improvements in mean scores on the BDI for participants in the DDP group when compared with TAU (Gregory and Sachdeva 2016).

### **Global impression and functioning**

The study reported significant improvements in mean scores on the Sheehan Disability Scale for participants in the DDP group when compared with TAU after 12 months (Gregory and Sachdeva 2016).

**TABLE C-17. Certainty-of-evidence ratings of outcomes comparing DBT with community therapy by experts**

| Outcomes                                                       | Participants, <i>N</i> ( <i>studies</i> ) | Certainty of the evidence (GRADE)                     | Anticipated absolute effects   |                                          |                                   |
|----------------------------------------------------------------|-------------------------------------------|-------------------------------------------------------|--------------------------------|------------------------------------------|-----------------------------------|
|                                                                |                                           |                                                       | Relative effect (95% CI)       | Effect with community therapy by experts | Difference in effect with DBT     |
| <b>Suicide attempts</b>                                        |                                           |                                                       |                                |                                          |                                   |
| Follow-up: mean 2 years                                        | 101 (one RCT: Linehan et al. 2006)        | ⊕⊕○○; LOW <sup>a,b</sup> for greater effects with DBT | <b>HR 2.66</b><br>(2.40–18.07) | 469 per 1,000                            | 345 more per 1,000 (312–531 more) |
| <b>Self-harm</b>                                               |                                           |                                                       |                                |                                          |                                   |
| Assessed with mean number of events<br>Follow-up: mean 2 years | 101 (one RCT: Linehan et al. 2006)        | ⊕⊕○○; LOW <sup>a,b</sup> for similar effects          | –                              | Mean number at endpoint=3.0              | Mean 0 lower (ns)                 |
| <b>Depression</b>                                              |                                           |                                                       |                                |                                          |                                   |
| Assessed with Ham-D<br>Follow-up: mean 2 years                 | 101 (one RCT: Linehan et al. 2006)        | ⊕⊕○○; LOW <sup>a,c</sup> for similar effects          | –                              | Mean score at endpoint=14.4              | Mean 1.8 lower (ns)               |

The risk in the intervention group (and its 95% CI) is based on the assumed risk in the comparison group and the relative effect of the intervention (and its 95% CI).

CI=confidence interval; DBT=dialectical behavior therapy; GRADE=Grading of Recommendations Assessment, Development, and Evaluation; Ham-D=Hamilton Rating Scale for Depression; HR=hazard ratio; ns=not significant; RCT=randomized controlled trial.

<sup>a</sup>Lack of intention-to-treat analysis: downgraded one step for risk of bias.

<sup>b</sup>Overall few events; downgraded one step for imprecision.

<sup>c</sup>Study does not meet optimal information size (i.e., number of participants in a meta-analysis); downgraded one step for imprecision.

**TABLE C-18. Certainty-of-evidence ratings of outcomes comparing DDP with TAU**

| Outcomes                                        | Participants, <i>N</i> ( <i>studies</i> ); follow-up       | Certainty of the evidence (GRADE)                                | Relative effect (95% CI) | Anticipated absolute effects                        |                                       |
|-------------------------------------------------|------------------------------------------------------------|------------------------------------------------------------------|--------------------------|-----------------------------------------------------|---------------------------------------|
|                                                 |                                                            |                                                                  |                          | Effect with TAU                                     | Difference in effect with DDP         |
| <b>Severity of BPD</b>                          |                                                            |                                                                  |                          |                                                     |                                       |
| Assessed with BEST<br>Follow-up: mean 12 months | 44 (one observational study:<br>Gregory and Sachdeva 2016) | ⊕○○○; VERY LOW <sup>a,b</sup><br>for greater effects with<br>DDP | –                        | Mean severity score at<br>endpoint=42.9             | Mean 9.9 lower ( <i>P</i> =0.006)     |
| <b>Depression</b>                               |                                                            |                                                                  |                          |                                                     |                                       |
| Assessed with BDI<br>Follow-up: mean 12 months  | 44 (one observational study:<br>Gregory and Sachdeva 2016) | ⊕○○○; VERY LOW <sup>a,b</sup><br>for greater effects with<br>DDP | –                        | Mean depression score at<br>endpoint=29.6           | Mean 12.5 lower<br>( <i>P</i> <0.001) |
| Self-injuries<br>Follow-up: mean 12 months      | 44 (one observational study:<br>Gregory and Sachdeva 2016) | ⊕○○○; VERY LOW <sup>a,b</sup><br>for similar effect              | –                        | Mean number of self-<br>injuries at<br>endpoint=1.8 | Mean 0.5 lower (ns)                   |
| <b>Suicide attempts</b>                         |                                                            |                                                                  |                          |                                                     |                                       |
| Follow-up: mean 12 months                       | 44 (one observational study:<br>Gregory and Sachdeva 2016) | ⊕○○○; VERY LOW <sup>a,b</sup><br>for similar effect              | –                        | Mean number of<br>attempts at<br>endpoint=1.5       | Mean 0.94 lower (ns)                  |
| <b>Functioning</b>                              |                                                            |                                                                  |                          |                                                     |                                       |
| Assessed with SDS<br>Follow-up: mean 12 months  | 44 (one observational study:<br>Gregory and Sachdeva 2016) | ⊕○○○; VERY LOW <sup>a,b</sup><br>for greater effects with<br>DDP | –                        | Mean functioning<br>score=7.0                       | Mean 3.2 lower ( <i>P</i> <0.001)     |

BDI=Beck Depression Inventory; BEST=Borderline Evaluation of Severity Over Time; BPD=borderline personality disorder; CI=confidence interval; DDP=dynamic deconstructive psychotherapy; GRADE=Grading of Recommendations Assessment, Development, and Evaluation; SDS=Sheehan Disability Scale; TAU=treatment as usual.

<sup>a</sup>Not controlled for confounding; downgraded two steps for risk of bias.

<sup>b</sup>Study does not meet optimal information size (i.e., number of participants in a meta-analysis); downgraded two steps for imprecision.



## **Incidence of adverse events, serious adverse events, and withdrawal due to adverse events**

The study did not report on the incidence of adverse events, serious adverse events, or withdrawal due to adverse events.

## **Mentalization-Based Treatment Versus Treatment as Usual**

One RCT (Beck et al. 2020) evaluated the efficacy of MBT compared with TAU alone. This Danish study included 112 participants who were followed for a duration of 12 months. The study was rated as having a high risk of bias because of high attrition. The trial reported no commercial funding.

Almost all of the study participants were female, with the exception of one person (Beck et al. 2020). The mean age was 16 years. The study excluded participants with comorbid diagnosis of pervasive developmental disorder, learning disability, anorexia, current psychosis, schizophrenia or schizotypal personality disorder, antisocial personality disorder, any other mental disorder other than BPD considered the primary diagnosis, current (past 2 months) substance use disorder (SUD; but not substance abuse), and current psychiatric inpatient treatment.

MBT, delivered over 12 months, consisted of 3 introductory sessions, 37 weekly group sessions (90 minutes each), 5 individual case formulation sessions, and 6 sessions for caregivers (Beck et al. 2020). TAU consisted of at least 12 individual supportive sessions, one per month, comprising psychoeducation, counseling, and crisis management and sessions as needed.

Detailed information on main study characteristics and treatment effects is presented in Appendix D. Table C-19 presents certainty-of-evidence ratings.

### **Severity of borderline personality disorder**

After 12 months of treatment, the study reported no significant differences between groups on the Borderline Personality Features Scale for Children, the Borderline Personality Features Scale for Parents, or the ZAN-BPD (Beck et al. 2020).

### **Severity of symptoms associated with borderline personality disorder**

After 12 months of treatment, the study reported no significant differences between groups on self-harm (measured by the Risk-Taking and Self-Harm Inventory for Adolescents) or depression (measured by the BDI for Youth) (Beck et al. 2020).

### **Global impression and functioning**

After 12 months of treatment, the study reported no significant differences between groups on the Children's Global Assessment Scale (Beck et al. 2020).

## **Incidence of adverse events, serious adverse events, and withdrawal due to adverse events**

The study reported no adverse events in either arm.

## **Mentalization-Based Treatment Versus Supportive Therapy**

Three RCTs, described in four articles, compared MBT with supportive therapy (Bateman and Fonagy 2009; Bateman et al. 2021; Carlyle et al. 2020; Jørgensen et al. 2013). Together, these studies provided data on 317 participants. Supportive therapy was not identical across the studies, but all included group sessions that focused on supportive techniques such as problem-solving. Two studies were rated as having a moderate risk of bias (Bateman and Fonagy 2009; Carlyle et al. 2020), and the other as a high risk of bias (Jørgensen et al. 2013). Reasons for ratings of high risk of bias included high attrition and deviations from the intended intervention.

**TABLE C-19. Certainty-of-evidence ratings of outcomes comparing MBT with TAU**

| Outcomes                                                         | Participants, <i>N</i> (studies) | Certainty of the evidence (GRADE)            | Relative effect (95% CI) | Anticipated absolute effects                                             |                                                                                                         |
|------------------------------------------------------------------|----------------------------------|----------------------------------------------|--------------------------|--------------------------------------------------------------------------|---------------------------------------------------------------------------------------------------------|
|                                                                  |                                  |                                              |                          | Effect with TAU                                                          | Difference in effect with MBT (95% CI)                                                                  |
| <b>Severity of BPD</b>                                           |                                  |                                              |                          |                                                                          |                                                                                                         |
| Assessed with BPFS-C, BPFS-P, ZAN-BPD<br>Follow-up: mean 1 years | 112 (one RCT: Beck et al. 2020)  | ⊕⊕○○; LOW <sup>a,b</sup> for similar effects | –                        | Mean score at endpoint for BPFS-C=71.3; for BPFS-P=68.7; for ZAN-BPD=8.0 | Mean for BPFS-C 0 (ns), for BPFS-P 0.1 lower (–7.0 to 7.3), for ZAN-BPD 0.6 lower (95% CI, –4.0 to 2.8) |
| <b>BPD symptoms</b>                                              |                                  |                                              |                          |                                                                          |                                                                                                         |
| Assessed with BDI-Y, RTSHIA<br>Follow-up: mean 1 year            | 112 (one RCT: Beck et al. 2020)  | ⊕⊕○○; LOW <sup>a,b</sup> for similar effects | –                        | Mean score at endpoint for BDI-Y=64.3, for RTSHIA=39.0                   | Mean for BDI-Y 0.7 lower (–6.5 to 5.1), for RTSHIA 1.4 lower (–7.1 to 4.3)                              |
| <b>Functioning</b>                                               |                                  |                                              |                          |                                                                          |                                                                                                         |
| Assessed with CGAS<br>Follow-up: mean 1 year                     | 112 (one RCT: Beck et al. 2020)  | ⊕⊕○○; LOW <sup>a,b</sup> for similar effects | –                        | Mean score at endpoint=46.7                                              | Mean 0.5 higher (–5.8 to 6.7)                                                                           |

BDI-Y=Beck Depression Inventory-Youth; BPD=borderline personality disorder; BPFS-C=Borderline Personality Features Scale for Children; BPFS-P=Borderline Personality Features Scale for Parents; CGAS=Children's Global Assessment Scale; CI=confidence interval; GRADE=Grading of Recommendations Assessment, Development, and Evaluation; MBT=mentalization-based treatment; RCT=randomized controlled trial; RTSHIA=Risk-Taking and Self-Harm Inventory for adolescents; TAU=treatment as usual; ZAN-BPD=Zanarini Rating Scale for Borderline Personality Disorder.

<sup>a</sup>High attrition; downgraded one step for risk of bias.

<sup>b</sup>Study does not meet optimal information size (i.e., number of participants in a meta-analysis); downgraded one step for imprecision.

The majority of participants were female, and the mean age across the three studies was 31 years. Race was reported in two studies, in which the majority of participants were White (Bateman and Fonagy 2009; Carlyle et al. 2020). Two studies were conducted in Europe (Bateman and Fonagy 2009; Jørgensen et al. 2013) and one in New Zealand (Carlyle et al. 2020). No study reported severity of BPD at baseline; however, one study reported global severity of symptoms at baseline that ranged from 1.7 points to 2.0 points on the Symptom Checklist–90 (SCL-90) Global Severity Index scale (Jørgensen et al. 2013). Treatment durations ranged from 18 months (Bateman and Fonagy 2009; Carlyle et al. 2020) to 24 months (Jørgensen et al. 2013). No study had commercial funding; one was funded through a foundation grant (Bateman and Fonagy 2009).

Detailed information on main study characteristics and treatment effects is presented in Appendix D. Table C–20 presents certainty-of-evidence ratings.

### **Severity of borderline personality disorder**

No study reported on the severity of BPD.

### **Severity of symptoms associated with borderline personality disorder**

All three studies assessed symptoms associated with BPD and reported mixed findings (Bateman and Fonagy 2009; Bateman et al. 2021; Carlyle et al. 2020; Jørgensen et al. 2013). Following 18 months of treatment, one study ( $N=134$ ), rated as having a moderate risk of bias, reported a significant reduction in suicide attempts, hospitalizations, and life-threatening self-harm in the previous 6-month period, along with improvements in interpersonal functioning and depression among patients receiving MBT compared with supportive therapy and case management (Bateman and Fonagy 2009). A 6-year follow-up of 97 participants reported that, compared with the supportive treatment and case management groups, significantly more of the MBT group who had achieved the primary recovery criteria (i.e., free of self-harm, suicide attempts, and inpatient hospital stays) had remained well during the follow-up period (Bateman et al. 2021).

In contrast, a similar study, rated as having a moderate risk of bias, attempting to replicate findings by Bateman and colleagues found no significant differences between groups in incidents of severe self-harm and suicide attempts in the previous 6 months (Carlyle et al. 2020). Similarly, a study ( $N=111$ ), rated as having a high risk of bias, reported no differences between groups in terms of interpersonal functioning, depression, and anxiety (Jørgensen et al. 2013).

### **Global impression and functioning**

With the exception of one outcome for which there was agreement, studies reported mixed findings in terms of global impression and functioning (Bateman and Fonagy 2009; Bateman et al. 2021; Carlyle et al. 2020; Jørgensen et al. 2013). One study ( $N=134$ ), rated as having a moderate risk of bias, reported significant improvements in Global Severity Index (using the SCL-90 Global Severity Index) among patients receiving MBT compared with supportive therapy and case management (Bateman and Fonagy 2009). In contrast, another study ( $N=111$ ), rated as having a high risk of bias, reported no differences between groups on the SCL-90 Global Severity Index (Jørgensen et al. 2013). Both studies reported significant improvement in independently rated global assessment functioning among patients receiving MBT compared with patients receiving supportive therapy (Bateman and Fonagy 2009; Jørgensen et al. 2013).

### **Incidence of adverse events, serious adverse events, and withdrawal due to adverse events**

No study reported on treatment-related adverse events including withdrawal due to adverse events.

**TABLE C-20. Certainty-of-evidence ratings of outcomes comparing MBT with supportive therapy for BPD**

| Outcomes                                            | Participants, <i>N</i> (studies)                               | Certainty of the evidence (GRADE)                           | Relative effect (95% CI) | Anticipated absolute effects              |                                                    |
|-----------------------------------------------------|----------------------------------------------------------------|-------------------------------------------------------------|--------------------------|-------------------------------------------|----------------------------------------------------|
|                                                     |                                                                |                                                             |                          | Effect with supportive therapy            | Difference in effect with MBT                      |
| <b>Anxiety</b>                                      |                                                                |                                                             |                          |                                           |                                                    |
| Assessed with BAI<br>Follow-up: 24 months           | 85 (one RCT: Jørgensen et al. 2013)                            | ⊕○○○; VERY LOW <sup>a,b</sup><br>for similar effects        | –                        | Mean score at endpoint=15.6               | Mean 2.1 lower (ns)                                |
| <b>Depression</b>                                   |                                                                |                                                             |                          |                                           |                                                    |
| Assessed with BDI<br>Follow-up: 18–24 months        | 219 (two RCTs: Bateman and Fonagy 2009; Jørgensen et al. 2013) | ⊕○○○; VERY LOW <sup>c,d,e</sup><br>for inconsistent effects | –                        | Mean score at endpoint=18.68 <sup>f</sup> | Inconsistent findings                              |
| <b>General psychopathology</b>                      |                                                                |                                                             |                          |                                           |                                                    |
| Assessed with SCL-90-GSI<br>Follow-up: 18–24 months | 219 (two RCTs: Bateman and Fonagy 2009; Jørgensen et al. 2013) | ⊕○○○; VERY LOW <sup>c,d,e</sup><br>for inconsistent effects | –                        | Mean score at endpoint=1.55 <sup>f</sup>  | Inconsistent findings                              |
| <b>Global functioning</b>                           |                                                                |                                                             |                          |                                           |                                                    |
| Assessed with GAF<br>Follow-up: 18–24 months        | 219 (two RCTs: Bateman and Fonagy 2009; Jørgensen et al. 2013) | ⊕⊕○○; LOW <sup>c,e</sup> for<br>greater effect with MBT     | –                        | Mean score at endpoint=53.2 <sup>f</sup>  | Mean 7.7 higher <sup>f</sup><br>( <i>P</i> <0.001) |
| <b>Interpersonal functioning</b>                    |                                                                |                                                             |                          |                                           |                                                    |
| Assessed with IIP<br>Follow-up: 18–24 months        | 219 (two RCTs: Bateman and Fonagy 2009; Jørgensen et al. 2013) | ⊕○○○; VERY LOW <sup>c,d,e</sup><br>for inconsistent effects | –                        | Mean score at endpoint=1.65 <sup>f</sup>  | Inconsistent findings                              |
| <b>Severe self-harm incidents</b>                   |                                                                |                                                             |                          |                                           |                                                    |
| Assessed with SCL-90-R<br>Follow-up: 18 months      | 206 (two RCTs: Bateman and Fonagy 2009; Carlyle et al. 2020)   | ⊕⊕○○; LOW <sup>d,e</sup> for<br>inconsistent effects        | –                        | Mean number at endpoint=1.66 <sup>f</sup> | Inconsistent findings                              |
| <b>Suicide attempts</b>                             |                                                                |                                                             |                          |                                           |                                                    |
| Assessed with SCL-90-R<br>Follow-up: 18 months      | 206 (two RCTs: Bateman and Fonagy 2009; Carlyle et al. 2020)   | ⊕⊕○○; LOW <sup>d,e</sup> for<br>inconsistent effects        | –                        | Mean number at endpoint=0.32 <sup>f</sup> | Inconsistent findings                              |

BAI=Beck Anxiety Inventory; BDI=Beck Depression Inventory; BPD=borderline personality disorder; CI=confidence interval; GAF=Global Assessment of Functioning; GRADE=Grading of Recommendations Assessment, Development, and Evaluation; GSI=Global Severity Index; IIP=Inventory of Interpersonal Problems; MBT=mentalization-based treatment; ns=not significant; RCT=randomized controlled trial; SCL-90-GSI=Symptom Checklist-90-Global Severity Index; SCL-90-R=Symptom Checklist-90-Revised.

<sup>a</sup>Study does not meet optimal information size (i.e., number of participants in a meta-analysis); downgraded two steps for imprecision.

<sup>b</sup>High risk of bias due to attrition and deviations from intended intervention; downgraded one step for risk of bias.

<sup>c</sup>One of two studies was high risk of bias due to attrition and deviations from intended intervention; downgraded one step for risk of bias.

<sup>d</sup>Two studies reported opposite direction of outcome; downgraded one step for inconsistency.

<sup>e</sup>Studies do not meet optimal information size (i.e., number of participants in a meta-analysis); downgraded one step for imprecision.

<sup>f</sup>Value is for the study rated at a moderate risk of bias (Bateman and Fonagy 2009).

## Mentalization-Based Treatment Versus Specialized Psychotherapy

Two studies, one RCT (Laurensen et al. 2018) that was rated as having a moderate risk of bias and one observational study with a nonconcurrent control group (Bales et al. 2015) that was rated as having a high risk of bias, compared day-hospital MBT with another specialized psychotherapy. Together, these studies provided data on 299 participants. Day-hospital MBT differed from typical MBT in terms of intensity; it involved daily group psychotherapy and weekly individual therapy along with art and writing therapy. The specialized psychotherapy comparator groups consisted of a variety of treatments, settings, and durations that were explicitly not limited to supportive therapy. Reasons for the high risk of bias rating included confounding and measurement of outcomes.

The majority of participants were female, and the mean age across the two studies was 32 years (Bales et al. 2015; Laurensen et al. 2018). Race was not reported in either study, both of which were conducted in the Netherlands. One study reported BPD severity ranging from 32.8 points to 34.3 points at baseline using the BPD Severity Index (Laurensen et al. 2018). Treatment duration was 18 months in both studies, with one study following patients through 36 months (Bales et al. 2015). Neither study had commercial funding.

Detailed information on main study characteristics and treatment effects is presented in Appendix D. Table C–21 presents certainty-of-evidence ratings.

### **Severity of borderline personality disorder**

One study ( $N=95$ ), rated as having a moderate risk of bias, examined improvements in the severity of BPD as a primary outcome of interest and found no significant difference between 18 months of day-hospital MBT and 18 months of specialized psychotherapy in BPD Severity Index total scores and Personality Assessment Inventory–Borderline Features Scale scores (Laurensen et al. 2018). There was significant improvement from baseline in both groups.

### **Severity of symptoms associated with borderline personality disorder**

One study, rated as having a moderate risk of bias, reported no significant difference between day-hospital MBT and specialized psychotherapy on the Inventory of Interpersonal Problems (Laurensen et al. 2018). There was significant improvement from baseline in both groups.

### **Global impression and functioning**

Both studies (Bales et al. 2015; Laurensen et al. 2018) examined global symptom severity using the Global Severity Index of the Brief Symptom Inventory and found mixed results. As with the other outcomes, the study by Laurensen et al. (2018) ( $N=95$ ), rated as having a moderate risk of bias, reported no significant difference in the severity of symptoms among patients receiving day-hospital MBT and those receiving specialized psychotherapy. In contrast, at the end of 18 months of treatment and again at the 36-month follow-up, the study by Bales et al. (2015;  $N=204$ ), rated as having a high risk of bias, reported significant improvements in symptom severity (measured using the Global Severity Index of the Brief Symptom Inventory) among patients receiving day-hospital MBT compared with those receiving specialized psychotherapy.

### **Incidence of adverse events, serious adverse events, and withdrawal due to adverse events**

One study (Laurensen et al. 2018), rated as having a moderate risk of bias, reported no serious adverse events among patients receiving either day-hospital MBT or other specialized psychotherapy.

## Systems Training for Emotional Predictability and Problem Solving Versus Treatment as Usual

Two RCTs (Blum et al. 2008; Bos et al. 2010) and one prospective cohort study (González-González et al. 2021) evaluated the efficacy of STEPPS compared with TAU. The studies provided data on

**TABLE C-21. Certainty-of-evidence ratings of outcomes comparing MBT with specialized psychotherapy**

| Outcomes                                            | Participants, <i>N</i> (studies)                                                 | Certainty of the evidence (GRADE)                        | Relative effect (95% CI) | Anticipated absolute effects             |                                            |
|-----------------------------------------------------|----------------------------------------------------------------------------------|----------------------------------------------------------|--------------------------|------------------------------------------|--------------------------------------------|
|                                                     |                                                                                  |                                                          |                          | Effect with specialized psychotherapy    | Difference in effect with day-hospital MBT |
| <b>Severity of BPD</b>                              |                                                                                  |                                                          |                          |                                          |                                            |
| Assessed with BPDSI<br>Follow-up: 18 months         | 95 (one RCT: Laurensen et al. 2018)                                              | ⊕⊕○○; LOW <sup>a</sup> for similar effects               | –                        | Mean score at endpoint=21.39             | Mean 0.76 lower (ns)                       |
| <b>General psychopathology</b>                      |                                                                                  |                                                          |                          |                                          |                                            |
| Assessed with GSI of BSI<br>Follow-up: 18–36 months | 299 (one RCT, one observational study; Bales et al. 2015; Laurensen et al. 2018) | ⊕○○○; VERY LOW <sup>b,c,d</sup> for inconsistent effects | –                        | Mean score at endpoint=1.04 <sup>e</sup> | Inconsistent findings                      |
| <b>Interpersonal functioning</b>                    |                                                                                  |                                                          |                          |                                          |                                            |
| Assessed with IIP<br>Follow-up: 18 months           | 95 (one RCT: Laurensen et al. 2018)                                              | ⊕⊕○○; LOW <sup>a</sup> for similar effects               | –                        | Mean score at endpoint=NR                | NR (ns)                                    |

BPD=borderline personality disorder; BPDSI=Borderline Personality Disorder Severity Index; BSI=Brief Symptom Inventory; CI=confidence interval; GRADE=Grading of Recommendations Assessment, Development, and Evaluation; GSI=Global Severity Index; IIP=Inventory of Interpersonal Problems; MBT=mentalization-based treatment; NR=not reported; ns=not significant; RCT=randomized controlled trial.

<sup>a</sup>Study does not meet optimal information size (i.e., number of participants in a meta-analysis); downgraded two steps for imprecision.

<sup>b</sup>One of two studies was rated at a high risk of bias due to confounding and high risk for bias in the measurement of outcomes; downgraded one step for risk of bias.

<sup>c</sup>Two studies reported opposite direction of outcome; downgraded one step for inconsistency.

<sup>d</sup>Studies do not meet optimal information size (i.e., number of participants in a meta-analysis); downgraded one step for imprecision.

<sup>e</sup>Value is for the study rated at a high risk of bias (Bales et al. 2015). Data NR for the study rated at a moderate risk of bias (Laurensen et al. 2018).

362 participants. One RCT (Bos et al. 2010) was rated as having a moderate risk of bias because of differential attrition, and one RCT (Blum et al. 2008) and one cohort study (González-González et al. 2021) were rated as having a high risk of bias for high overall attrition. Additionally, the cohort study had risks of bias from selection and confounding. The timing of the initial follow-up ranged from 20 weeks to 24 weeks for the two RCTs. Both reported 1-year outcomes. For one RCT, the primary endpoint was at 20 weeks (Blum et al. 2008); for the other, the primary endpoint was at 1 year (Bos et al. 2010). For the cohort study (González-González et al. 2021), the primary endpoint was at 2 years. Both RCTs were funded; neither had pharmaceutical industry support. The cohort study did not have specific funding. The majority of the study participants were female, and the mean age was 32 years in the RCTs and 34 years in the cohort study. Only one of the studies reported ethnicity; 94% of participants were White (Blum et al. 2008). One RCT reported mean baseline BEST scores ranging from 39 to 40 (Blum et al. 2008). The cohort study reported mean baseline BEST scores ranging from 50 to 52. Studies excluded patients with psychotic or primary neurological disorders, who were cognitively impaired, or who had participated in STEPPS previously.

STEPPS involved 18 or 20 weekly therapy sessions; components included psychoeducation about BPD, emotion management skills training, and behavior management skills training. TAU consisted of usual care such as individual psychotherapy, medication, and case management.

Detailed information on main study characteristics and treatment effects is presented in Appendix D. Table C–22 presents certainty-of-evidence ratings.

### **Severity of borderline personality disorder**

All three studies reported that STEPPS was associated with significant improvements in BPD-specific symptoms (measured by ZAN-BPD and Borderline Personality Disorder Checklist–40) at the primary endpoint (20 weeks, 1 year, and 2 years, respectively) as compared with TAU. However, one RCT, rated as having a high risk of bias, reported no differences on the BEST scale for participants in the STEPPS group compared with the TAU group at 20 weeks or between 20 weeks and 1 year (Blum et al. 2008).

### **Severity of symptoms associated with borderline personality disorder**

An RCT (Blum et al. 2008), rated as having a high risk of bias, reported significant improvement in impulsiveness (measured by the BIS) and depression (measured by the BDI) for participants in the STEPPS group when compared with TAU at 20 weeks. The same RCT reported no significant differences in suicide attempts or self-harm acts at 1 year.

### **Global impression and functioning**

Both RCTs (Blum et al. 2008; Bos et al. 2010) reported on global impression and functioning using four scales: global impression using SCL-90 (at 20 weeks and 1 year in one RCT and at 24 weeks in another) and the CGI (at 20 weeks and 1 year in one RCT), quality of life using the World Health Organization Quality of Life scale (at 1 year in one RCT), and functioning using the Social Adjustment Scale and Global Assessment Scale (at 20 weeks and 1 year in one RCT). Together, these findings suggest benefits in global impression and functioning for the STEPPS group compared with TAU.

Regarding global impressions at 20–24 weeks using SCL-90, both RCTs reported significant improvement for the STEPPS when compared with TAU (Blum et al. 2008; Bos et al. 2010). One RCT (Blum et al. 2008), rated as having a high risk of bias, also reported significant improvement for the STEPPS group when compared with TAU at 20 weeks in CGI severity and improvement ratings. The same study, rated as having a high risk of bias, reported no significant differences between 20 weeks and 1 year in SCL-90 or CGI severity or improvement ratings.

Regarding quality of life, one RCT (Bos et al. 2010), rated as having a moderate risk of bias, reported significant improvement for the STEPPS group when compared with TAU at 1 year.

**TABLE C-22. Certainty-of-evidence ratings of outcomes comparing STEPPS with TAU**

| Outcomes                                                                   | Participants, <i>N</i> (studies)                                                                         | Certainty of the evidence (GRADE)                           | Relative effect (95% CI) | Anticipated absolute effects                                                                             |                                                                                                                                  |
|----------------------------------------------------------------------------|----------------------------------------------------------------------------------------------------------|-------------------------------------------------------------|--------------------------|----------------------------------------------------------------------------------------------------------|----------------------------------------------------------------------------------------------------------------------------------|
|                                                                            |                                                                                                          |                                                             |                          | Effect with TAU                                                                                          | Difference in effect with STEPPS                                                                                                 |
| <b>Severity of BPD</b>                                                     |                                                                                                          |                                                             |                          |                                                                                                          |                                                                                                                                  |
| Assessed with ZAN-BPD, BPD-40, BEST<br>Follow-up: mean 20 weeks to 2 years | 240 (two RCTs, one prospective cohort: Blum et al. 2008; Bos et al. 2010; González-González et al. 2021) | ⊕⊕⊕○; MODERATE for greater effects with STEPPS <sup>a</sup> | –                        | Mean score at primary endpoint on ZAN-BPD=13.4; on BPD-40=88.6; on BEST=34.1 in trial and 28.8 in cohort | Mean 3.6 lower on ZAN-BPD; 10.4 lower on BPD-40 ( $P=0.001$ ); 2.3 lower on BEST (ns) in trial, 17.7 lower in cohort ( $P<0.0$ ) |
| <b>Depression</b>                                                          |                                                                                                          |                                                             |                          |                                                                                                          |                                                                                                                                  |
| Assessed with BDI<br>Follow-up: mean 20 weeks                              | 124 (one RCT: Blum et al. 2008)                                                                          | ⊕⊕○○; LOW <sup>a,b</sup> for greater effect with STEPPS     | –                        | Mean score at primary endpoint=25.8                                                                      | Mean 3.8 higher ( $P=0.03$ )                                                                                                     |
| <b>Impulsiveness</b>                                                       |                                                                                                          |                                                             |                          |                                                                                                          |                                                                                                                                  |
| Assessed with BIS<br>Follow-up: mean 20 weeks                              | 124 (one RCT: Blum et al. 2008)                                                                          | ⊕⊕○○; LOW <sup>a,b</sup> for greater effect with STEPPS     | –                        | Mean score at primary endpoint=76.8                                                                      | Mean 4.1 lower ( $P=0.004$ )                                                                                                     |
| <b>Self-harm attempts</b>                                                  |                                                                                                          |                                                             |                          |                                                                                                          |                                                                                                                                  |
| Follow-up: mean 1 year                                                     | 124 (one RCT: Blum et al. 2008)                                                                          | ⊕⊕○○; LOW <sup>a,b</sup> for similar effects                | Not estimable            | NR                                                                                                       | (ns)                                                                                                                             |
| <b>Suicide attempts</b>                                                    |                                                                                                          |                                                             |                          |                                                                                                          |                                                                                                                                  |
| Follow-up: mean 1 year                                                     | 124 (one RCT: Blum et al. 2008)                                                                          | ⊕⊕○○; LOW <sup>a,b</sup> for similar effects                | Not estimable            | NR                                                                                                       | (ns)                                                                                                                             |
| <b>General psychopathology</b>                                             |                                                                                                          |                                                             |                          |                                                                                                          |                                                                                                                                  |
| Assessed with CGI-S, CGI-I, SCL-90<br>Follow-up: 20 weeks to 1 year        | 203 (two RCTs: Blum et al. 2008; Bos et al. 2010)                                                        | ⊕⊕⊕○; MODERATE for greater effects with STEPPS <sup>a</sup> | –                        | Varied by study and measure                                                                              | $P\leq 0.03$                                                                                                                     |
| <b>Quality of life</b>                                                     |                                                                                                          |                                                             |                          |                                                                                                          |                                                                                                                                  |
| Assessed with WHOQOL<br>Follow-up: mean 1 year                             | 79 (one RCT: Bos et al. 2010)                                                                            | ⊕⊕⊕○; MODERATE <sup>b</sup> for greater effect with STEPPS  | –                        | Mean score at primary endpoint=11.3                                                                      | Mean 1.3 higher (0 to 0)                                                                                                         |



**TABLE C-22. Certainty-of-evidence ratings of outcomes comparing STEPPS with TAU (continued)**

| Outcomes                                           | Participants, <i>N</i> (studies) | Certainty of the evidence (GRADE)                       | Relative effect (95% CI) | Anticipated absolute effects                            |                                                  |
|----------------------------------------------------|----------------------------------|---------------------------------------------------------|--------------------------|---------------------------------------------------------|--------------------------------------------------|
|                                                    |                                  |                                                         |                          | Effect with TAU                                         | Difference in effect with STEPPS                 |
| <b>Functioning</b>                                 |                                  |                                                         |                          |                                                         |                                                  |
| Assessed with GAS, SAS<br>Follow-up: mean 20 weeks | 124 (one RCT: Blum et al. 2008)  | ⊕⊕○○; LOW <sup>a,b</sup> for greater effect with STEPPS | –                        | Mean score at primary endpoint on GAS=43.5; on SAS=26.3 | Mean 7 higher on GAS (ns); 1.7 lower on SAS (ns) |

BDI=Beck Depression Inventory; BEST=Borderline Evaluation of Severity Over Time; BIS=Barratt Impulsiveness Scale; BPD=borderline personality disorder; BPD-40=Borderline Personality Disorder checklist-40; CGI-I=Clinical Global Impressions-Improvement; CGI-S=Clinical Global Impressions-Severity; CI=confidence interval; GAS=Global Assessment Scale; GRADE=Grading of Recommendations Assessment, Development, and Evaluation; Nr=not reported; ns=not significant; RCT=randomized controlled trial; SAS=Social Assessment Scale; SCL-90=Symptom Checklist-90; STEPPS=Systems Training for Emotional Predictability and Problem Solving; TAU=treatment as usual; WHOQOL=World Health Organization Quality of Life; ZAN-BPD=Zanarini Rating Scale for Borderline Personality Disorder.

<sup>a</sup>High overall attrition; downgraded one step for risk of bias.

<sup>b</sup>Study does not meet optimal information size (i.e., number of participants in a meta-analysis); downgraded one step for imprecision.

Regarding functioning, one RCT (Blum et al. 2008), rated as having a high risk of bias, reported significant differences favoring the STEPPS group at 20 weeks and no significant differences between 20 weeks and 1 year in functioning (measured by the Global Assessment Scale). However, the same study reported no significant differences in social adjustment (measured by the Social Adjustment Scale at 20 weeks and between 20 weeks and 1 year).

### **Incidence of adverse events, serious adverse events, and withdrawal due to adverse events**

The studies did not report on adverse events or withdrawals due to adverse events.

## **Transference-Focused Psychotherapy Versus Treatment by Experienced Community Psychotherapists**

One RCT (Doering et al. 2010) conducted in Austria and Germany evaluated the efficacy of TFP compared with TAU. The study provided data on 104 participants. The study was rated as having a high risk of bias because of high differential attrition from follow-up. Follow-up duration was 12 months. The trial was funded by the Austrian National Bank.

All of the study participants were female and had a mean age of 28 years (Doering et al. 2010). The ethnicity of the participants was not reported. Authors noted that the study included participants with less severe BPD, with higher GAF scores, fewer comorbid Axis I and II disorders, and fewer self-harming acts than other treatment studies of BPD because patients with more severe symptoms would receive inpatient treatment in Austria and Germany. Studies excluded patients with schizophrenia; bipolar I and II disorder with a major depressive, manic, or hypomanic episode during the previous 6 months; SUD in the past 6 months; or organic pathology or intellectual disability.

TFP is a modified psychodynamic therapy and consists of two 50-minute sessions delivered every week by experienced clinical psychologists or medical doctors, along with medications as needed for 1 year of treatment (Doering et al. 2010). TAU consisted of individualized standard care from community psychiatrists.

Detailed information on main study characteristics and treatment effects is presented in Appendix D. Table C–23 presents certainty-of-evidence ratings.

### **Severity of borderline personality disorder**

TFP was superior to TAU in last-observation-carried-forward analyses for the number of DSM-IV (American Psychiatric Association 1994) diagnostic criteria on average for BPD and proportion having fewer than five DSM-IV borderline criteria after 1 year (Doering et al. 2010).

### **Severity of symptoms associated with borderline personality disorder**

The study (Doering et al. 2010) reported a significantly lower proportion of participants with suicide attempts for TFP than TAU for last-observation-carried-forward analyses and marginally significant for number of suicide attempts. However, completers analyses controlling for dose response for number of psychotherapy sessions (48.5 sessions, on average, for TFP vs. 18.6 for community psychotherapists) found no significant differences in either measure. The study reported no significant differences in depression (measured by BDI) or state and trait anxiety (measured by State-Trait Anxiety Inventory).

### **Global impression and functioning**

TFP was significantly superior to TAU for GAF scores but not for the Brief Symptom Inventory (Doering et al. 2010).

**TABLE C-23. Certainty-of-evidence ratings of outcomes comparing TFP with treatment by experienced community psychotherapists**

| Outcomes                                                                                              | Participants, <i>N</i><br>(studies) | Certainty of the<br>evidence (GRADE)                 | Relative<br>effect (95%<br>CI) | Anticipated absolute effects                                              |                                                                        |
|-------------------------------------------------------------------------------------------------------|-------------------------------------|------------------------------------------------------|--------------------------------|---------------------------------------------------------------------------|------------------------------------------------------------------------|
|                                                                                                       |                                     |                                                      |                                | Effects with treatment<br>by experienced<br>community<br>psychotherapists | Difference in effect with<br>TFP                                       |
| <b>Severity of BPD symptoms</b>                                                                       |                                     |                                                      |                                |                                                                           |                                                                        |
| Assessed with proportion meeting fewer than five DSM-IV diagnostic criteria<br>Follow-up: mean 1 year | 104 (one RCT: Doering et al. 2010)  | ⊕⊕○○; LOW <sup>a,b</sup> for greater effect with TFP | RR 2.23 (1.07–4.65)            | 154 per 1,000                                                             | 189 more per 1,000 (11 more to 562 more)                               |
| <b>Anxiety</b>                                                                                        |                                     |                                                      |                                |                                                                           |                                                                        |
| Assessed with STAI<br>Follow-up: mean 1 year                                                          | 104 (one RCT: Doering et al. 2010)  | ⊕○○○; VERY LOW <sup>a,c</sup> for similar effect     | –                              | Mean score at endpoint for state=50.47; for trait anxiety=55.49           | Mean score for state 2.30 higher and for trait anxiety 0.43 lower (ns) |
| <b>Depression</b>                                                                                     |                                     |                                                      |                                |                                                                           |                                                                        |
| Assessed with BDI<br>Follow-up: mean 1 year                                                           | 104 (one RCT: Doering et al. 2010)  | ⊕○○○; VERY LOW <sup>a,c</sup> for similar effect     | –                              | Mean score at endpoint=20.02                                              | Mean 1.65 higher (ns)                                                  |
| <b>Suicide attempts</b>                                                                               |                                     |                                                      |                                |                                                                           |                                                                        |
| Assessed with proportion with any suicide attempts<br>Follow-up: mean 1 year                          | 104 (one RCT: Doering et al. 2010)  | ⊕○○○; VERY LOW <sup>a,d</sup> for similar effect     | RR 0.63 (0.27–1.51)*           | 135 per 1,000                                                             | 50 fewer per 1,000 (98 fewer to 69 more)                               |
| <b>General psychopathology</b>                                                                        |                                     |                                                      |                                |                                                                           |                                                                        |
| Assessed with BSI<br>Follow-up: mean 1 year                                                           | 104 (one RCT: Doering et al. 2010)  | ⊕○○○; VERY LOW <sup>a,c</sup> for similar effect     | –                              | Mean score at endpoint=1.27                                               | MD 0.06 higher (ns)                                                    |
| <b>Functioning</b>                                                                                    |                                     |                                                      |                                |                                                                           |                                                                        |
| Assessed with GAF<br>Follow-up: mean 1 year                                                           | 104 (one RCT: Doering et al. 2010)  | ⊕⊕○○; LOW <sup>a,b</sup> for greater effect with TFP | –                              | Mean score at endpoint=56.06                                              | Mean 2.6 higher ( <i>P</i> =0.001)                                     |

BDI=Beck Depression Inventory; BPD=borderline personality disorder; BSI=Brief Symptom Inventory; CI=confidence interval; DSM-IV=*Diagnostic and Statistical Manual of Mental Disorders*; GAF=Global Assessment of Functioning; GRADE=Grading of Recommendations Assessment, Development, and Evaluation; LOCF=last observation carried forward; MD=mean difference; ns=not significant; RCT=randomized controlled trial; RR=risk ratio; STAI=State-Trait Anxiety Inventory; TAU=treatment as usual; TFP=transference-focused psychotherapy. \*Calculated based on data at follow-up.

<sup>a</sup>High overall and differential attrition; downgraded one step for risk of bias.

<sup>b</sup>Few events or study does not meet optimal information size (i.e., number of participants in a meta-analysis); downgraded one step for precision.

<sup>c</sup>Study does not meet optimal information size (i.e., number of participants in a meta-analysis); results likely had wide CIs, *P* not significant; downgraded two steps for precision.

<sup>d</sup>Few events; significant LOCF results, adjustment for dose in completers analyses no longer significant; downgraded two steps for precision.

## **Incidence of adverse events, serious adverse events, and withdrawal due to adverse events**

The study did not report on the incidence of adverse events, serious adverse events, or withdrawal due to adverse events.

## Transference-Focused Psychotherapy Versus Schema-Focused Therapy

One RCT (described in two publications; Giesen-Bloo et al. 2006; Spinhoven et al. 2007), rated as having a high risk of bias and conducted in the Netherlands, compared TFP with schema-focused therapy (SFT) in 88 patients with BPD. The majority of participants were female (93%), with a mean age of 31 years. Race and ethnicity were not reported. Mean baseline BPD severity ranged from 33.5 points to 34.4 points on the BPD Severity Index. Reasons for a rating of high risk of bias included high attrition (39%) and measurement of outcomes.

Treatment duration was 3 years (Giesen-Bloo et al. 2006). Both TFP and SFT included two 50-minute sessions per week. The TFP focused on the patient-therapist relationship, while the SFT involved integrated cognitive therapy focused on four schema modes. The study was funded by a grant from the Dutch Health Care Insurance Board.

Detailed information on main study characteristics and treatment effects is presented in Appendix D. Table C-24 presents certainty-of-evidence ratings.

### **Severity of borderline personality disorder**

At the end of a 3-year treatment phase, participants receiving SFT exhibited significant greater clinical improvement on the BPD Severity Index than patients receiving TFP. Reliable clinical improvement (defined as improvement of at least 11.7 points at the last assessment) favored SFT over TFP (RR=2.33 [95% CI 1.24 to 4.37]) (Giesen-Bloo et al. 2006).

### **Severity of symptoms associated with borderline personality disorder**

The study did not report on symptoms associated with BPD.

### **Global impression and functioning**

After 3 years of treatment, there was no significant difference between TFP and SFT in quality-of-life measures (Giesen-Bloo et al. 2006). There was significant improvement in quality-of-life scores from baseline in both groups.

## **Incidence of adverse events, serious adverse events, and withdrawal due to adverse events**

The study did not report treatment-related adverse events including withdrawal due to adverse events.

## Psychotherapy for Special Populations

Detailed information on main study characteristics and treatment effects is presented in Appendix D for nine studies that compared various psychotherapies within special populations. Overall, there is no evidence to support one psychotherapy over another for any of the special populations identified.

### **Comprehensive validation therapy plus 12-step versus dialectical behavior therapy for borderline personality disorder and substance use disorder**

One RCT ( $N=24$ ; Linehan et al. 2002), rated as having a moderate risk of bias and conducted in the United States, compared comprehensive validation therapy plus 12-step (a manualized approach that provided the major acceptance-based strategies used in DBT in combination with participation in 12-step programs) with DBT for the treatment of comorbid BPD and SUD. At a 16-month follow-

**TABLE C-24. Certainty-of-evidence ratings of outcomes comparing TFP with SFT for BPD**

| Outcomes                                   | Participants, <i>N</i> ( <i>studies</i> ) | Certainty of the evidence (GRADE)                         | Relative effect (95% CI) | Anticipated absolute effects |                                    |
|--------------------------------------------|-------------------------------------------|-----------------------------------------------------------|--------------------------|------------------------------|------------------------------------|
|                                            |                                           |                                                           |                          | Effect with TFP              | Difference in effect with SFT      |
| <b>Severity of BPD</b>                     |                                           |                                                           |                          |                              |                                    |
| Assessed with BPDSI<br>Follow-up: 3 years  | 88 (one RCT: Giesen-Bloo et al. 2006)     | ⊕○○○; VERY LOW <sup>a,b</sup> for greater effect with SFT | –                        | Mean score at endpoint=21.87 | Mean 5.63 lower ( <i>P</i> =0.005) |
| <b>Quality of life</b>                     |                                           |                                                           |                          |                              |                                    |
| Assessed with EQ<br>Follow-up: 3 years     | 88 (one RCT: Giesen-Bloo et al. 2006)     | ⊕○○○; VERY LOW <sup>a,b</sup> for similar effects         | –                        | Mean score at endpoint=67.5  | Mean 3.0 lower (ns)                |
| Assessed with WHOQOL<br>Follow-up: 3 years | 88 (one RCT: Giesen-Bloo et al. 2006)     | ⊕○○○; VERY LOW <sup>a,b</sup> for similar effects         | –                        | Mean score at endpoint=11.09 | Mean 0.5 higher (ns)               |

BPD=borderline personality disorder; BPDSI=Borderline Personality Disorder Severity Index; CI=confidence interval; EQ=European Quality of Life scale; GRADE=Grading of Recommendations Assessment, Development, and Evaluation; ns=not significant; RCT=randomized controlled trial; SFT=schema-focused therapy; TFP=transference-focused psychotherapy; WHOQOL=World Health Organization Quality of Life Scale.

<sup>a</sup>High risk of bias due to high attrition and moderate risk of bias related to measurement of outcomes; downgraded one step for risk of bias.

<sup>b</sup>Study does not meet optimal information size (i.e., number of participants in a meta-analysis); downgraded two steps for imprecision.

up, there was no significant difference between comprehensive validation therapy plus 12-step and DBT in percentage of opiate-positive urine specimens, Brief Symptom Inventory scores, and scores on the Global Adjustment Scale, although the percentage of opiate-positive urine specimens decreased and rating scale scores improved in both groups. In addition, the incidence of parasuicidal behavior, measured using the Parasuicide History Interview, did not differ between groups and was low throughout the treatment period.

### **Mentalization-based treatment plus substance use disorder treatment versus substance use disorder treatment alone for borderline personality disorder and substance use disorder**

One feasibility RCT ( $N=46$ ; Philips et al. 2018), conducted in Sweden and rated as having a high risk of bias, compared MBT plus SUD treatment with SUD treatment alone for the treatment of BPD and SUD. The MBT included a combination of individual therapy and group therapy over 18 months. At 18 months, there was no significant difference between groups on any outcome measured, including borderline symptom severity, suicide attempts, self-harm, inventory of interpersonal problems, reflective functioning, and global functioning.

### **Dynamic deconstructive psychotherapy versus treatment as usual in the community for borderline personality disorder and alcohol use disorder**

One RCT ( $N=30$ ; Gregory et al. 2008), conducted in the United States and rated as having a high risk of bias, compared DDP with TAU for the treatment of comorbid BPD and alcohol use disorder. DDP involved weekly individual therapy focused on fostering verbalization of affects and elaboration of recent interpersonal experiences into simple narratives. Participants were encouraged but not required to attend some form of group therapy. Most TAU participants received a combination of individual psychotherapy and medication management. At 12 months, there was no significant difference between DDP and TAU groups in parasuicide behavior (measured using the adapted 3-month version of the Lifetime Parasuicide Count), alcohol misuse, and dissociation. DDP led to significant improvements in depression and in core symptoms of BPD as measured by the BEST scale.

### **Dialectical behavior therapy plus dialectical behavior therapy–prolonged exposure versus dialectical behavior therapy alone for borderline personality disorder and posttraumatic stress disorder**

One RCT described in two publications ( $N=26$ ; Harned et al. 2014, 2018), rated as having a high risk of bias and conducted in the United States, compared DBT plus DBT–prolonged exposure with standard DBT for the treatment of comorbid BPD and posttraumatic stress disorder (PTSD). This pilot study did not conduct a between-group statistical analysis on the primary outcomes related to intentional self-harm. Preliminary findings suggested that DBT plus prolonged exposure may improve global social adjustment, health-related quality of life, and achievement of good global functioning, but not interpersonal problems or quality of life.

### **Cognitive-behavioral therapy versus dialectical behavior therapy for borderline personality disorder and eating disorders**

One nonrandomized clinical trial ( $N=118$ ; Navarro-Haro et al. 2021), rated as having a moderate risk of bias, compared CBT (described as TAU) with DBT for the treatment of comorbid BPD and eating disorders and found no significant differences between groups in the primary outcome of suicide attempts in the previous 6 months. Depression scores on the BDI-II were significantly better among patients receiving DBT than CBT. At a 6-year follow-up of 69 participants, there were no significant differences between participants who had received DBT and those who had received CBT for depression, emotional regulation, and resilience.

### **Specialist supportive clinical management versus modified mentalization-based treatment for borderline personality disorder and eating disorders**

One RCT ( $N=68$ ; Robinson et al. 2016), conducted in the United Kingdom and rated as having a high risk of bias, compared specialist supportive clinical management with modified MBT for the treatment of comorbid BPD and eating disorders and found no significant difference between groups on the ZAN-BPD.

### **Cognitive therapy plus fluoxetine versus interpersonal therapy plus fluoxetine for borderline personality disorder and major depressive disorder**

One RCT ( $N=32$ ; Bellino et al. 2007), conducted in Italy and rated as having a moderate risk of bias, compared cognitive therapy plus fluoxetine with interpersonal therapy plus fluoxetine for the treatment of comorbid BPD and MDD and at the 24-week follow-up found no differences between groups in symptoms of depression, anxiety, or global functioning scales.

### **Individual drug counseling versus integrative borderline personality disorder—oriented adolescent family therapy for borderline personality disorder and substance use disorder among adolescents**

One RCT ( $N=40$ ; Santisteban et al. 2015), conducted in the United States and rated as having a high risk of bias, compared individual drug counseling with integrative BPD-oriented adolescent family therapy for the treatment of comorbid BPD and SUD. Individual drug counseling consisted of two sessions per week of individual manualized drug counseling with a monthly family meeting with caregivers. Goals of the treatment included identifying signs and symptoms of addiction and triggers to use, increasing motivation to achieve and sustain abstinence, and developing more effective problem-solving strategies. Integrative BPD-oriented adolescent family therapy consisted of two sessions per week that included family therapy, individual therapy, and skills-building interventions targeting factors that directly contribute to adolescent drug abuse and other self-harm behaviors, such as emotion dysregulation and impulsivity, failure to establish life goals and ineffective life skills, unstable family attachment, and maladaptive family interactions. At the 12-month follow-up, there was no significant difference between individual drug counseling and integrative BPD-oriented adolescent family therapy on BPD behavior as measured by the borderline personality scale from the Millon Adolescent Clinical Inventory and no significant difference in substance use.

### **Manualized good clinical care versus cognitive analytic therapy for adolescents with borderline personality disorder**

One RCT ( $N=86$ ; Chanen et al. 2008), rated as having a moderate risk of bias and conducted in Australia, compared manualized good clinical practice with cognitive analytic therapy (which uses integrative psychotherapy) for adolescents with BPD. At 24 months, there were no significant differences between groups across a range of outcomes including BPD severity, parasuicidal behaviors, and functioning.

## Grading of the Overall Supporting Body of Research Evidence for Benefits of Psychotherapy in Borderline Personality Disorder

- *Magnitude of effect:* Low. When studies showed differences between treatments, these were typically low in size. Few studies used wait-list control comparison conditions, and the effects of BPD-specific psychotherapies may be greater if compared with no treatment.
- *Risk of bias:* Moderate. Although a few studies had a low risk of bias, the majority of studies had a moderate or high risk of bias.

- *Applicability*: The studies included individuals with BPD, but some studies excluded patients who were at significant suicide risk or who had other co-occurring conditions, which would limit applicability. Most samples were White, although some studies did not describe the race or ethnicity of participants. Study populations were primarily young adult women in the United States, Canada, United Kingdom, Australia, or Europe. Differences in health care delivery systems may result in some differences from practice in the United States. Most studies were conducted in outpatients, and there may be less applicability to inpatient settings.
- *Directness*: Direct. Some of the outcomes such as functioning addressed patient-oriented outcomes, whereas others such as BPD severity addressed symptom-related outcomes that are also of importance to patients.
- *Consistency*: Inconsistent. Findings for a specific treatment differed for measured outcomes, and findings for specific outcomes differed for various psychotherapies. Overall, however, there were consistent improvements in all treatment arms on at least some outcomes even when differences between the treatment groups did not show statistically significant differences.
- *Precision*: Imprecise. For many of the psychotherapy comparisons, the studies did not meet the optimal information size (i.e., number of participants in a meta-analysis) and were downgraded for imprecision.
- *Dose-response relationship*: No information on dose-response relationships was available.
- *Confounding factors (including likely direction of effect)*: Present. Confounding factors may increase the observed effect. Subjects and treating clinicians are aware of the treatment arm to which subjects were assigned. This may cause confounding effects due to expectancy.
- *Publication bias*: Unable to be assessed. The relatively small number of studies for each comparison and the heterogeneity of study designs make it difficult to assess publication bias. However, publication bias seems possible because of the tendency for negative clinical trial results to go unpublished.
- *Overall strength of research evidence*: Moderate. The writing group assessed the overall strength of research evidence for psychotherapy in BPD as moderate. Although the relatively small number of studies for each comparison and the heterogeneity of study designs make it difficult to assess the strength of research evidence for specific psychotherapies, in the vast majority of studies, all treatment arms showed improvement with psychotherapy even when differences between the treatment groups did not show statistically significant differences. When compared with TAU or other active comparison arms, superiority was noted on at least some outcomes for a number of specific psychotherapies (e.g., DBT, DDP, GPM, MBT, SFT, STEPPS, TFP).

## Grading of the Overall Supporting Body of Research Evidence for Harms of Psychotherapy in Borderline Personality Disorder

On the basis of the lack of data on harms in studies of psychotherapies in BPD, no grading of the body of research evidence is possible.

## Pharmacotherapy

### Statement 6 – Clinical Review Before Medication Initiation

APA *recommends (1C)* that a patient with borderline personality disorder have a review of co-occurring disorders, prior psychotherapies, other nonpharmacological treatments, past medication trials, and current medications before initiating any new medication.

Evidence for this statement comes from general principles of assessment and clinical care in psychiatric practice. A detailed systematic review to support this statement is outside the scope of this



guideline; however, less comprehensive searches of the literature did not yield any studies related to this recommendation in the context of BPD treatment. Consequently, the strength of research evidence is rated as low.

## Grading of the Overall Supporting Body of Research Evidence for Clinical Review Before Medication Initiation in Patients With Borderline Personality Disorder

On the basis of the limitations of the evidence for assessment of patients with possible BPD, no grading of the body of research evidence is possible.

### Statement 7 – Pharmacotherapy Principles

APA *suggests* (2C) that any psychotropic medication treatment of borderline personality disorder be time-limited, aimed at addressing a specific measurable target symptom, and adjunctive to psychotherapy.

Evidence for this statement comes primarily from the systematic review conducted by RTI on the efficacy and comparative effectiveness of second-generation antipsychotics (SGAs), anticonvulsants, and antidepressants in patients with BPD (Gartlehner et al. 2021). Few studies were designed to specifically address benefits of pharmacotherapy as an adjunct to psychotherapy. One small study found an adjunctive benefit of olanzapine as an add-on to DBT (Soler et al. 2005), but small studies of adjunctive fluoxetine in patients with (Bellino et al. 2006) and without (Simpson et al. 2004) MDD did not find a benefit for BPD. Older literature suggested possible effects of lithium, the monoamine oxidase inhibitor tranylcypromine, and the anticonvulsant carbamazepine (Cowdry and Gardner 1988; de la Fuente and Lotstra 1994; Gardner and Cowdry 1986; Links et al. 1990). However, sample sizes were small, and BPD was diagnosed using different criteria than at present.

#### Second-Generation Antipsychotics Versus Placebo

Nine double-blinded RCTs evaluated the efficacy of four SGAs (aripiprazole, olanzapine, quetiapine extended release [ER], ziprasidone) compared with placebo (Black et al. 2014; Bogenschutz and Nurnberg 2004; Linehan et al. 2008; Nickel et al. 2006; Pascual et al. 2008; Schulz et al. 2008; Soler et al. 2005; Zanarini and Frankenburg 2001; Zanarini et al. 2011b). Overall, these studies provided data on 1,124 participants. Two studies were rated as having a moderate (Black et al. 2014; Nickel et al. 2006) risk of bias and seven as having a high risk of bias (Bogenschutz and Nurnberg 2004; Linehan et al. 2008; Pascual et al. 2008; Schulz et al. 2008; Soler et al. 2005; Zanarini and Frankenburg 2001; Zanarini et al. 2011b). Reasons for ratings of high risk of bias were lack of intention-to-treat analysis and high attrition. Four trials employed fixed-dose designs assessing aripiprazole (15 mg/day; Nickel et al. 2006), olanzapine (2.5 mg/day or 5 mg/day; Linehan et al. 2008; Zanarini and Frankenburg 2001), and quetiapine ER (150 mg/day or 300 mg/day; Black et al. 2014); five trials used flexible-dose designs for olanzapine (2.5–20 mg/day; Bogenschutz and Nurnberg 2004; Schulz et al. 2008; Soler et al. 2005; Zanarini et al. 2011b) and ziprasidone (40–200 mg/day; Pascual et al. 2008). Follow-up durations ranged from 8 weeks to 6 months. All trials, except one (Nickel et al. 2006), were funded by the pharmaceutical industry.

The majority of trial participants were female and White; mean ages across studies ranged from 21 years to 34 years. Participants were moderately ill at baseline, with mean ZAN-BPD scores ranging from 14.6 to 17.7 and scores on the CGI scale modified for BPD from 4.3 to 4.8. Studies, in general, excluded patients with psychiatric comorbidities such as schizophrenia, MDD, alcohol or substance use disorder, or bipolar disorder.

Detailed information on main study characteristics and treatment effects is presented in Appendix D. Table C–25 presents certainty-of-evidence ratings.

**TABLE C-25. Certainty-of-evidence ratings of outcomes comparing SGAs with placebo**

| Outcomes                                                     | Participants, <i>N</i> (studies)                                                                                                  | Certainty of the evidence (GRADE)                | Relative effect (95% CI) | Anticipated absolute effects |                                                           |
|--------------------------------------------------------------|-----------------------------------------------------------------------------------------------------------------------------------|--------------------------------------------------|--------------------------|------------------------------|-----------------------------------------------------------|
|                                                              |                                                                                                                                   |                                                  |                          | Effect with placebo          | Difference in effect with SGA                             |
| <b>Severity of BPD</b>                                       |                                                                                                                                   |                                                  |                          |                              |                                                           |
| Assessed with ZAN-BPD<br>Follow-up: range 8–12 weeks         | 860 (three RCTs: Black et al. 2014; Schulz et al. 2008; Zanarini et al. 2011b)                                                    | ⊕⊕○○; LOW <sup>a</sup> for no effect of SGA      | –                        | Mean score at endpoint=10.3* | Mean 1.2 lower                                            |
| <b>Anger</b>                                                 |                                                                                                                                   |                                                  |                          |                              |                                                           |
| Assessed with STAXI<br>Follow-up: mean 8 weeks               | 52 (one RCT: Nickel et al. 2006)                                                                                                  | ⊕⊕○○; LOW <sup>b</sup> for effect of SGA         | –                        | Mean score at endpoint=26.2  | Mean 7.7 lower ( $P<0.001$ )                              |
| <b>Aggression</b>                                            |                                                                                                                                   |                                                  |                          |                              |                                                           |
| Assessed with MOAS<br>Follow-up: range 8–12 weeks            | 610 (four RCTs: Black et al. 2014; Bogenschutz and Nurnberg 2004; Linehan et al. 2008; Zanarini et al. 2011b)                     | ⊕⊕○○; LOW <sup>a,c</sup> for no effect of SGA    | –                        | Mean score at endpoint=18.6* | Mean 14.7 lower (ns)                                      |
| <b>Depression</b>                                            |                                                                                                                                   |                                                  |                          |                              |                                                           |
| Assessed with Ham-D and MADRS<br>Follow-up: range 8–21 weeks | 497 (five RCTs: Gunderson et al. 2011; Linehan et al. 2008; Nickel et al. 2006; Pascual et al. 2008)                              | ⊕⊕○○; LOW <sup>d,e</sup> for no effect of SGA    | –                        | Mean score at endpoint=NR    | Mean 0.28 SDs (Cohen's <i>d</i> ) greater (-0.05 to 0.60) |
| <b>Impulsiveness</b>                                         |                                                                                                                                   |                                                  |                          |                              |                                                           |
| Assessed with BIS<br>Follow-up: range 8–12 weeks             | 155 (two RCTs: Black et al. 2014; Pascual et al. 2008)                                                                            | ⊕⊕○○; LOW <sup>d,f</sup> for no effect of SGA    | –                        | Mean score at endpoint=69.1* | Mean 1.4 lower (ns)                                       |
| <b>General psychopathology</b>                               |                                                                                                                                   |                                                  |                          |                              |                                                           |
| Assessed with SCL-90<br>Follow-up: range 8–12 weeks          | 698 (five RCTs: Black et al. 2014; Bogenschutz and Nurnberg 2004; Nickel et al. 2006; Pascual et al. 2008; Zanarini et al. 2011b) | ⊕⊕⊕○; MODERATE <sup>a</sup> for effect of SGA    | –                        | Mean score at endpoint=10.3* | Mean 1.2 lower (ns)                                       |
| <b>Functioning</b>                                           |                                                                                                                                   |                                                  |                          |                              |                                                           |
| Assessed with GAF and SDS<br>Follow-up: mean 8–12 weeks      | 586 (three RCTs: Black et al. 2014; Bogenschutz and Nurnberg 2004; Zanarini et al. 2011b)                                         | ⊕⊕⊕○; MODERATE <sup>g</sup> for no effect of SGA | –                        | Mean score at endpoint=63.2* | Mean 2.9 higher (ns)                                      |

**TABLE C-25. Certainty-of-evidence ratings of outcomes comparing SGAs with placebo (continued)**

| Outcomes                                   | Participants, <i>N</i> ( <i>studies</i> )                                                                                                            | Certainty of the evidence (GRADE)                               | Relative effect (95% CI) | Anticipated absolute effects |                                          |
|--------------------------------------------|------------------------------------------------------------------------------------------------------------------------------------------------------|-----------------------------------------------------------------|--------------------------|------------------------------|------------------------------------------|
|                                            |                                                                                                                                                      |                                                                 |                          | Effect with placebo          | Difference in effect with SGA            |
| <b>Incidence of adverse events</b>         |                                                                                                                                                      |                                                                 |                          |                              |                                          |
| Follow-up: range 8–12 weeks                | 920 (four RCTs: Black et al. 2014; Pascual et al. 2008; Schulz et al. 2008; Zanarini et al. 2011b)                                                   | ⊕⊕⊕○; MODERATE <sup>a</sup> for higher risk with antipsychotics | RR 1.10 (1.00–1.21)      | 571 per 1,000                | 57 more per 1,000 (0 fewer to 120 more)  |
| <b>Withdrawal due to adverse events</b>    |                                                                                                                                                      |                                                                 |                          |                              |                                          |
| Follow-up: range 8–12 weeks                | 917 (five RCTs: Bogenschutz and Nurnberg 2004; Pascual et al. 2008; Schulz et al. 2008; Zanarini and Frankenburg 2001; Zanarini et al. 2011b)        | ⊕⊕○○; LOW <sup>a,h</sup> for similar risks                      | RR 1.91 (0.83–4.43)      | 69 per 1,000                 | 63 more per 1,000 (12 fewer to 237 more) |
| <b>Incidence of serious adverse events</b> |                                                                                                                                                      |                                                                 |                          |                              |                                          |
| Follow-up: range 8–12 weeks                | 957 (six RCTs: Black et al. 2014; Bogenschutz and Nurnberg 2004; Nickel et al. 2006; Pascual et al. 2008; Schulz et al. 2008; Zanarini et al. 2011b) | ⊕○○○ VERY LOW <sup>i</sup> for higher risk with placebo         | RR 0.46 (0.23–0.95)**    | 44 per 1,000                 | 24 fewer per 1,000 (34 fewer to 2 fewer) |

The risk in the intervention group (and its 95% CI) is based on the assumed risk in the comparison group and the relative effect of the intervention (and its 95% CI).

BIS=Barratt Impulsiveness Scale; BPD=borderline personality disorder; CI=confidence interval; GAF=Global Assessment of Functioning; GRADE=Grading of Recommendations Assessment, Development, and Evaluation; Ham-D=Hamilton Rating Scale for Depression; MADRS=Montgomery-Åsberg Depression Rating Scale; MOAS=Modified Overt Aggression Scale; NR=not reported; ns=not significant; RCT=randomized controlled trial; RR=risk ratio; SCL-90=Symptom Checklist-90; SD=standard deviation; SDS=Sheehan Disability Scale; SGA=second-generation antipsychotic; STAXI=State-Trait Anger Expression Inventory; ZAN-BPD=Zanarini Rating Scale for Borderline Personality Disorder.

\*Effect estimate from largest study or study with lowest risk of bias (Zanarini et al. 2011b or Black et al. 2014).

\*\*Effect estimate from Zanarini et al. 2011b. Other studies reported no serious adverse events.

<sup>a</sup>Majority of studies were high risk of bias; downgraded two steps for study limitations.

<sup>b</sup>Small study, does not meet optimal information size (i.e., number of participants in a meta-analysis); downgraded two steps for imprecision.

<sup>c</sup>Schulz et al. 2008 assessed MOAS but did not report data; downgraded one step for reporting bias.

<sup>d</sup>At least half of studies were high risk of bias; downgraded one step for study limitations.

<sup>e</sup>Inconsistent effects, largest study shows substantially smaller treatment effect; downgraded one step for inconsistency.

<sup>f</sup>Small study, does not meet optimal information size (i.e., number of participants in a meta-analysis); downgraded one step for imprecision.

<sup>g</sup>Does not meet optimal information size (i.e., number of participants in a meta-analysis); downgraded one step for imprecision.

<sup>h</sup>Few events; downgraded one step for imprecision.

<sup>i</sup>Very few events; downgraded two steps for imprecision.

## Severity of borderline personality disorder

Three studies assessed changes in the severity of BPD on the ZAN-BPD (Black et al. 2014; Schulz et al. 2008; Zanarini et al. 2011b). Two multinational, flexible-dose trials on olanzapine, rated as having a high risk of bias, reported mixed results (Gunderson et al. 2011; Schulz et al. 2008). A three-armed trial ( $N=451$ ) included a fixed-dosage arm with olanzapine 2.5 mg/day ( $n=150$ ), which did not achieve significant improvements compared with placebo on the ZAN-BPD (Zanarini et al. 2011b). A flexibly dosed arm showed significantly greater improvements for participants treated with olanzapine 5–10 mg/day than those treated with placebo, although the absolute difference in points was small (1.5 points) (Zanarini et al. 2011b). By contrast, another large trial ( $N=314$ ) reported no significant differences between olanzapine 5–20 mg/day and placebo on the ZAN-BPD (Schulz et al. 2008).

A fixed-dosage trial assessing quetiapine ER ( $N=95$ ), rated as having a moderate risk of bias, reported significant improvements on the ZAN-BPD scale for low-dosage (150 mg/day) but not moderate-dosage (300 mg/day) treatment with quetiapine ER compared with placebo (treatment effects NR) (Black et al. 2014).

## Severity of symptoms associated with borderline personality disorder

Results assessing changes in the severity of symptoms associated with BPD reported mixed results regarding improvements in anger, impulsiveness, aggression, and depressive symptoms. A random-effects meta-analysis on the reduction of depressive symptoms favored SGAs over placebo but rendered no significant difference (Figure C-1).

One study ( $N=52$ ), rated as having a moderate risk of bias, reported significant improvements for aripiprazole on the State-Trait Anger Expression Inventory (STAXI; Nickel et al. 2006). By contrast, two RCTs ( $N=95$  and  $N=60$ ), one moderate risk of bias and the other high, detected no significant improvements for quetiapine ER (Black et al. 2014) and ziprasidone (Pascual et al. 2008) on the BIS.

Regarding improvement of aggression, one moderate risk of bias RCT ( $N=451$ ) (Zanarini et al. 2011b) and two RCTs ( $N=40$  and  $N=24$ ) (Bogenschutz and Nurnberg 2004; Linehan et al. 2008), rated as having a high risk of bias, reported no significant differences between olanzapine and placebo on the Modified Overt Aggression Scale (MOAS). By contrast, another RCT ( $N=95$ ), rated as having a moderate risk of bias, detected significant improvements for quetiapine ER compared with placebo on the MOAS (Black et al. 2014).

## Global impression and functioning

Five RCTs assessed differences between SGAs and placebo on the SCL-90-R and provided mixed results (Black et al. 2014; Bogenschutz and Nurnberg 2004; Nickel et al. 2006; Pascual et al. 2008; Zanarini et al. 2011b). Three RCTs ( $N=451$  [Zanarini et al. 2011b],  $N=52$  [Nickel et al. 2006],  $N=95$  [Black et al. 2014]), rated as having a moderate risk of bias, reported significantly greater improvements on the SCL-90-R for participants treated with SGAs (aripiprazole, olanzapine, quetiapine) compared with participants in the placebo groups. Two RCTs, one on olanzapine ( $N=40$ ; Bogenschutz and Nurnberg 2004) and the other on ziprasidone ( $N=60$ ; Pascual et al. 2008), that were both rated as having a high risk of bias favored SGAs over placebo but rendered no significant differences between active treatments and placebo on the SCL-90-R. Studies provided insufficient data for meta-analyses.

Likewise, two trials ( $N=40$  and  $N=60$ ), rated as having a high risk of bias, provided mixed results about improvements with olanzapine versus placebo on the CGI scale (Bogenschutz and Nurnberg 2004; Soler et al. 2005). Bogenschutz and Nurnberg (2004) reported a significant improvement with olanzapine, whereas Soler et al. (2005) found no significant differences in treatment effects for olanzapine and placebo on the CGI scale.

An 18-month follow-up of the trial by Nickel et al. (2006;  $N=52$ ) reported that the significant difference on the SCL-90-R between aripiprazole and placebo could be maintained (Nickel et al. 2007).

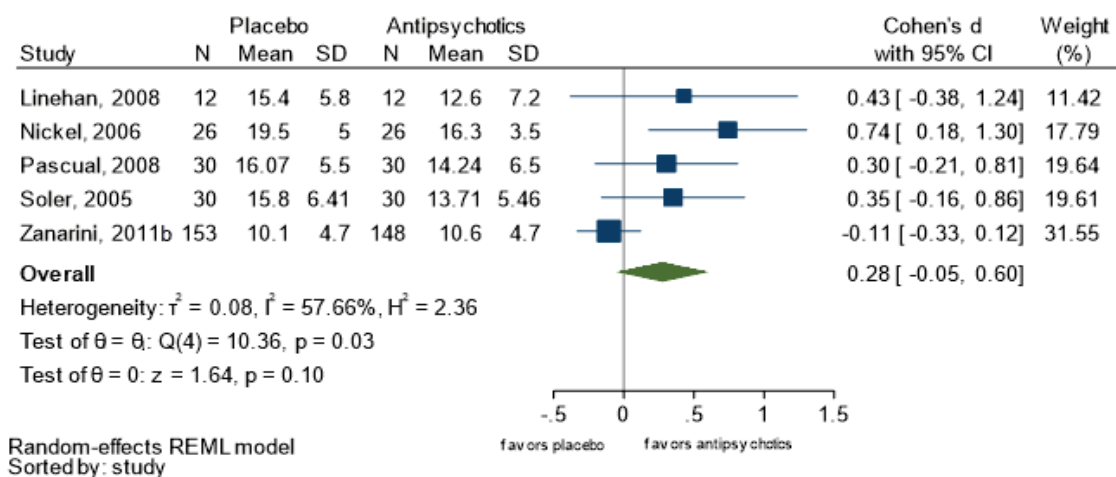

**FIGURE C-1.** Standardized mean differences of changes of depressive symptoms for second-generation antipsychotics versus placebo.

CI=confidence interval; N=sample size; REML=restricted maximum likelihood; SD=standard deviation.  
 Source. Linehan et al. 2008; Nickel et al. 2006; Pascual et al. 2008; Soler et al. 2005; Zanarini et al. 2011b.

Three trials, two rated as moderate risk of bias (Black et al. 2014; Zanarini et al. 2011b) and one rated as high risk of bias (Bogenschutz and Nurnberg 2004), with a total of 586 participants, reported no significant differences in functional capacity comparing quetiapine ER or olanzapine with placebo.

### **Incidence of adverse events, serious adverse events, and withdrawal due to adverse events**

The incidence of adverse events was generally higher in the groups that received SGAs (Black et al. 2014; Pascual et al. 2008; Schulz et al. 2008; Zanarini et al. 2011b). A random-effects meta-analysis showed a small, but significantly higher risk of adverse events for participants treated with antipsychotics compared with placebo (Figure C-2).

Likewise, withdrawals due to adverse events were numerically higher for participants receiving SGAs than for those receiving placebo (Bogenschutz and Nurnberg 2004; Linehan et al. 2008; Moher et al. 2015; Pascual et al. 2008; Schulz et al. 2008; Zanarini and Frankenburg 2001; Zanarini et al. 2011b). A random-effects meta-analysis, however, did not reach a significant difference (Figure C-3).

The incidence of serious adverse events, when reported, was numerically lower for SGAs than for placebo. Sample sizes, however, were too small to detect rare but serious adverse events reliably.

### **Grading of the overall supporting body of research evidence for benefits of second-generation antipsychotics in borderline personality disorder**

- *Magnitude of effect:* Low. There was a small benefit of SGAs on general psychopathology but no effect on other outcomes.
- *Risk of bias:* High. Of the RCT studies on SGAs, two had a moderate risk of bias and seven had a high risk of bias, suggesting that the body of evidence has a high risk of bias.
- *Applicability:* Studies included individuals with a diagnosis of BPD, but many excluded individuals taking other medications or who had other co-occurring disorders, which are common among clinical populations. The symptom severity of patients in these trials was also less than

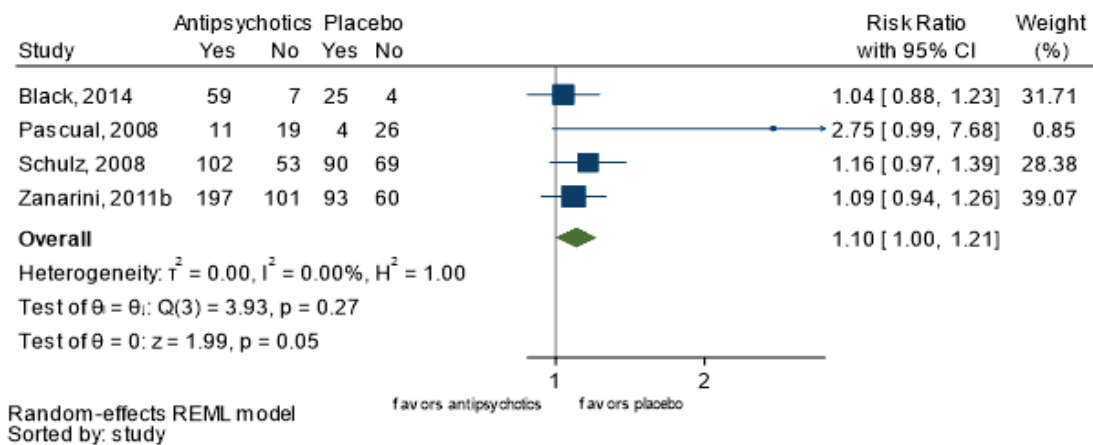

**FIGURE C-2.** Random effects meta-analysis of the incidence of adverse events comparing second-generation antipsychotics with placebo.

CI=confidence interval; REML=restricted maximum likelihood.

Source. Black et al. 2014; Pascual et al. 2008; Schulz et al. 2008; Zanarini et al. 2011b.

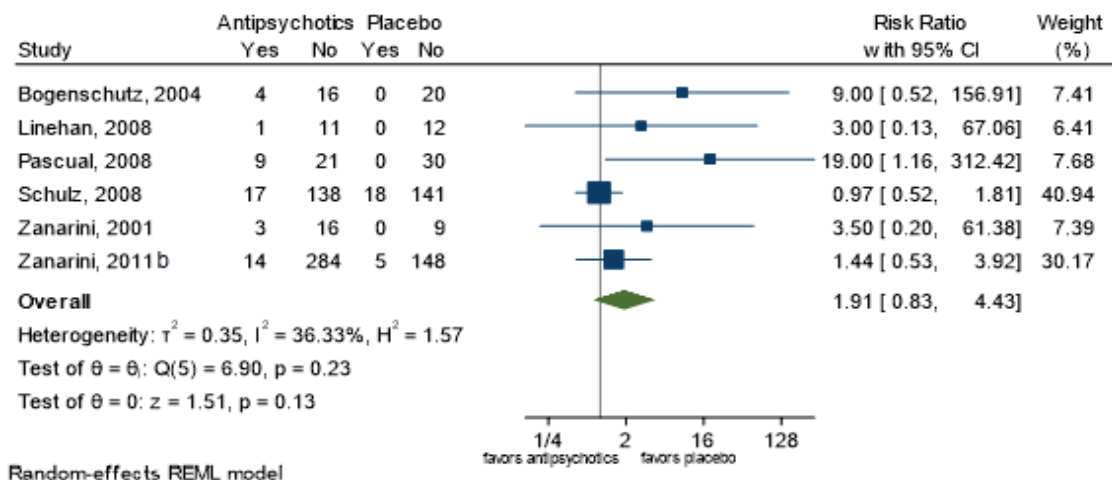

**FIGURE C-3.** Random effects meta-analysis of withdrawal due to adverse events comparing second-generation antipsychotics with placebo.

CI=confidence interval; REML=restricted maximum likelihood.

Source. Bogenschutz and Nurnberg 2004; Linehan et al. 2008; Pascual et al. 2008; Schulz et al. 2008; Zanarini and Frankenburg 2001; Zanarini et al. 2011b.

is typically seen in clinical populations. Demographically, the study samples were primarily young adult White females. Some but not all studies included a mix of races and ethnicities. Medication dosages that were studied were generally consistent with clinical practice.

- **Directness:** Direct. Some of the outcomes such as functioning addressed patient-oriented outcomes whereas others, such as BPD severity, addressed symptom-related outcomes that are also of importance to patients.

- *Consistency*: Inconsistent. In many of the studies, there was at least one outcome measure that showed a statistically significant effect. However, these were not consistent for specific SGAs or for SGAs as a group.
- *Precision*: Imprecise. For many of the outcomes, the optimal information size (i.e., number of participants in a meta-analysis) was not met and the certainty of evidence was downgraded for imprecision.
- *Dose-response relationship*: Insufficient information. Although two studies included treatment arms with two different dosages of medication, there was inconsistent evidence for a dose-response relationship.
- *Confounding factors (including likely direction of effect)*: Not identified. No specific confounding effects were noted.
- *Publication bias*: Unable to be assessed. The relatively small number of studies of each SGA and the heterogeneity of study designs make it difficult to assess publication bias. However, publication bias seems possible because of the tendency for negative clinical trial results to go unpublished.
- *Overall strength of research evidence*: Low. There is a high risk of bias of the majority of the studies, inconsistency of some of the findings, and some limits on the applicability of the studies to typical clinical practice.

### **Grading of the overall supporting body of research evidence for harms of second-generation antipsychotics in borderline personality disorder**

- *Magnitude of effect*: Low. Although study withdrawals due to adverse effects were comparable for SGAs and placebo, there was a small increase in adverse effects with SGAs and a very small increase in serious adverse effects with placebo.
- *Risk of bias*: High. Of the RCT studies on SGAs, two had a moderate risk of bias and seven had a high risk of bias, suggesting that the body of evidence has a high risk of bias.
- *Applicability*: Studies included individuals with a diagnosis of BPD, but many excluded individuals taking other medications or who had other co-occurring disorders, which are common among clinical populations. Demographically, the study samples were primarily young adult White females. Some but not all studies included a mix of races and ethnicities. Medication dosages that were studied were generally consistent with clinical practice.
- *Directness*: Direct as well as indirect. Outcomes included adverse effects and serious adverse effects but also study withdrawal due to adverse effects.
- *Consistency*: Inconsistent. Findings were different for adverse effects, serious adverse effects, and study withdrawal due to adverse effects.
- *Precision*: Imprecise. For many of the outcomes, the optimal information size (i.e., number of participants in a meta-analysis) was not met and the certainty of evidence was downgraded for imprecision.
- *Dose-response relationship*: Insufficient information. Although two studies included treatment arms with two different dosages of medication, there was inconsistent evidence for a dose-response relationship.
- *Confounding factors (including likely direction of effect)*: Not identified. No specific confounding effects were noted.
- *Publication bias*: Unable to be assessed. The relatively small number of studies of each SGA and the heterogeneity of study designs make it difficult to assess publication bias. However, publication bias seems possible because of the tendency for negative clinical trial results to go unpublished.
- *Overall strength of research evidence*: Low. There is a high risk of bias of the majority of the studies, inconsistency of some of the findings, and some limits on the applicability of the studies to typical clinical practice.

## Second-Generation Antipsychotic Versus Antidepressant

One industry-funded RCT ( $N=45$ ; Zanarini et al. 2004c), rated as having a moderate risk of bias, assessed differences in efficacy between olanzapine (2.5–7.5 mg/day), fluoxetine (10–30 mg/day), and a combination of fluoxetine and olanzapine. The study duration was 8 weeks. All trial participants were females between 18 years and 40 years of age; the majority were White. The severity of disease at baseline was not reported.

Detailed information on main study characteristics and treatment effects is presented in Appendix D. Table C–26 presents certainty-of-evidence ratings.

### **Severity of borderline personality disorder**

The study did not report any relevant outcomes.

### **Severity of symptoms associated with borderline personality disorder**

After 8 weeks, participants treated with olanzapine or a combination of olanzapine and fluoxetine had significantly greater improvements in aggression (MOAS) and depressive symptoms (Montgomery-Åsberg Depression Rating Scale) than participants treated with fluoxetine alone (Zanarini et al. 2004c).

### **Global impression and functioning**

The study did not report any relevant outcomes.

### **Incidence of adverse events, serious adverse events, and withdrawal due to adverse events**

The study did not report data on the incidence of adverse or serious adverse events. Only two participants (one in the fluoxetine and one in the olanzapine plus fluoxetine group) withdrew because of adverse events (Zanarini et al. 2004c).

## Second-Generation Antipsychotics Versus Second-Generation Antipsychotics

One RCT ( $N=51$ ; Bozzatello et al. 2017) and one retrospective cohort study ( $N=116$ ; García-Carmona et al. 2021) compared SGAs with other SGAs.

The RCT, rated as having a high risk of bias, assessed differences in efficacy between asenapine (5–10 mg/day) and olanzapine (5–10 mg/day) (Bozzatello et al. 2017). The study duration was 12 weeks. All trial participants were between 18 years and 50 years of age; the majority were female (63%), with race being unreported.

The high risk of bias retrospective cohort study compared the effectiveness of oral SGAs (not specified) and long-acting injectable SGAs (aripiprazole, paliperidone, risperidone) (García-Carmona et al. 2021). The study used data from 116 outpatients in Spain with follow-up data from 1 month to 3 months.

Detailed information on main study characteristics and treatment effects is presented in Appendix D. Table C–27 presents certainty-of-evidence ratings.

### **Severity of borderline personality disorder**

After 12 weeks, the RCT reported no significant difference on the BPD Severity Index between the asenapine and olanzapine groups (Bozzatello et al. 2017).

### **Severity of symptoms associated with borderline personality disorder**

After 12 weeks, the RCT reported no significant differences on the BIS, the Self-Harm Inventory, and the MOAS between the asenapine and olanzapine groups (Bozzatello et al. 2017). The retrospective



**TABLE C-26. Certainty-of-evidence ratings of outcomes comparing SGA with second-generation antidepressant**

| Outcomes                                       | Participants, <i>N</i> ( <i>studies</i> ) | Certainty of the evidence (GRADE)                                    | Anticipated absolute effects |                             |                                                 |
|------------------------------------------------|-------------------------------------------|----------------------------------------------------------------------|------------------------------|-----------------------------|-------------------------------------------------|
|                                                |                                           |                                                                      | Relative effect (95% CI)     | Effect with antidepressants | Difference in effect with SGA                   |
| <b>Olanzapine vs. fluoxetine</b>               |                                           |                                                                      |                              |                             |                                                 |
| <i>Aggression</i>                              |                                           |                                                                      |                              |                             |                                                 |
| Assessed with MOAS<br>Follow-up: mean 8 weeks  | 30 (one RCT: Zanarini et al. 2004c)       | ⊕○○○; LOW <sup>a</sup> for greater effect of olanzapine              | –                            | Mean score at endpoint=7.83 | Mean <b>4.3 lower</b> ( <i>P</i> =0.003)        |
| <i>Depression</i>                              |                                           |                                                                      |                              |                             |                                                 |
| Assessed with MADRS<br>Follow-up: mean 8 weeks | 30 (one RCT: Zanarini et al. 2004c)       | ⊕○○○; LOW <sup>a</sup> for greater effect of olanzapine              | –                            | Mean score at endpoint=6.2  | Mean <b>1.0 lower</b> ( <i>P</i> <0.001)        |
| <b>Olanzapine + fluoxetine vs. fluoxetine</b>  |                                           |                                                                      |                              |                             |                                                 |
| <i>Aggression</i>                              |                                           |                                                                      |                              |                             |                                                 |
| Assessed with MOAS<br>Follow-up: mean 8 weeks  | 29 (one RCT: Zanarini et al. 2004c)       | ⊕○○○ LOW <sup>a</sup> for greater effect of olanzapine + fluoxetine  | –                            | Mean score at endpoint=7.83 | Mean <b>4.8 lower</b> ( <i>P</i> <0.001)        |
| <i>Depression</i>                              |                                           |                                                                      |                              |                             |                                                 |
| Assessed with MADRS<br>Follow-up: mean 8 weeks | 29 (one RCT: Zanarini et al. 2004c)       | ⊕○○○; LOW <sup>a</sup> for greater effect of olanzapine + fluoxetine | –                            | Mean score at endpoint=6.2  | Mean <b>1.8 lower</b> ( <i>P</i> =0.02)         |
| <i>Withdrawals due to adverse events</i>       |                                           |                                                                      |                              |                             |                                                 |
| Follow-up: mean 8 weeks                        | 29 (one RCT: Zanarini et al. 2004c)       | ⊕○○○; VERY LOW <sup>a,b</sup> for similar risks                      | RR 0.94 (0.06–13.68)         | 71 per 1,000                | <b>4 fewer per 1,000</b> (67 fewer to 906 more) |

The risk in the intervention group (and its 95% CI) is based on the assumed risk in the comparison group and the relative effect of the intervention (and its 95% CI).

CI=confidence interval; GRADE=Grading of Recommendations Assessment, Development, and Evaluation; MADRS=Montgomery-Åsberg Depression Scale; MOAS=Modified Overt Aggression Scale; RCT=randomized controlled trial; RR=risk ratio; SGA=second-generation antipsychotic.

<sup>a</sup>Small study, does not meet optimal information size (i.e., number of participants in a meta-analysis); downgraded two steps for imprecision.

<sup>b</sup>Unclear how withdrawal due to adverse events was determined; downgraded one step for indirectness.

**TABLE C-27. Certainty-of-evidence ratings of outcomes comparing SGAs with SGAs**

| Outcomes                                        | Participants, <i>N</i> (studies)     | Certainty of the evidence (GRADE)                    | Relative effect (95% CI)      | Anticipated absolute effects    |                                               |
|-------------------------------------------------|--------------------------------------|------------------------------------------------------|-------------------------------|---------------------------------|-----------------------------------------------|
|                                                 |                                      |                                                      |                               | Effect with olanzapine          | Difference in effect with asenapine           |
| Severity of BPD                                 |                                      |                                                      |                               |                                 |                                               |
| Assessed with BPDSI<br>Follow-up: mean 12 weeks | 51 (one RCT: Bozzatello et al. 2017) | ⊕○○○; VERY LOW <sup>a,b</sup><br>for similar effects | –                             | Mean score at<br>endpoint=49.12 | Mean 2.23 lower (ns)                          |
| Aggression                                      |                                      |                                                      |                               |                                 |                                               |
| Assessed with MOAS<br>Follow-up: mean 12 weeks  | 51 (one RCT: Bozzatello et al. 2017) | ⊕○○○; VERY LOW <sup>a,b</sup><br>for similar effects | –                             | Mean score at<br>endpoint=4.8   | Mean 1.4 higher (ns)                          |
| Impulsiveness                                   |                                      |                                                      |                               |                                 |                                               |
| Assessed with BIS<br>Follow-up: mean 12 weeks   | 51 (one RCT: Bozzatello et al. 2017) | ⊕○○○; VERY LOW <sup>a,b</sup><br>for similar effects | –                             | Mean score at<br>endpoint=72.9  | Mean 8.2 lower (ns)                           |
| Self-harm                                       |                                      |                                                      |                               |                                 |                                               |
| Assessed with SHI<br>Follow-up: mean 12 weeks   | 51 (one RCT: Bozzatello et al. 2017) | ⊕○○○; VERY LOW <sup>a,b</sup><br>for similar effects | –                             | Mean score at<br>endpoint=10    | Mean 2 lower (ns)                             |
| Global impression                               |                                      |                                                      |                               |                                 |                                               |
| Assessed with CGI-S<br>Follow-up: mean 12 weeks | 51 (one RCT: Bozzatello et al. 2017) | ⊕○○○; VERY LOW <sup>a,b</sup><br>for similar effects | –                             | Mean score at<br>endpoint=3.9   | Mean 0.2 lower (ns)                           |
| Incidence of adverse events                     |                                      |                                                      |                               |                                 |                                               |
| Assessed with DOTES<br>Follow-up: mean 12 weeks | 40 (one RCT: Bozzatello et al. 2017) | ⊕○○○; VERY LOW <sup>a,b</sup><br>for similar risks   | <b>RR 1.38</b><br>(0.43–4.40) | 263 per 1,000                   | 100 more per 1,000 (150<br>fewer to 895 more) |

The risk in the intervention group (and its 95% CI) is based on the assumed risk in the comparison group and the relative effect of the intervention (and its 95% CI).

BIS=Barratt Impulsiveness Scale; BPD=borderline personality disorder; BPDSI=Borderline Personality Disorder Severity Index; CGI-S=Clinical Global Impression–Severity; CI=confidence interval; DOTES=Dosage Record and Treatment Emergent Symptom Scale; GRADE=Grading of Recommendations Assessment, Development, and Evaluation; MOAS=Modified Overt Aggression Scale; ns=not significant; RCT=randomized controlled trial; RR=risk ratio; SGA=second-generation antipsychotic; SHI=Self-Harm Inventory.

<sup>a</sup>High attrition; downgraded one step for risk of bias.

<sup>b</sup>Small study, does not meet optimal information size (i.e., number of participants in a meta-analysis); downgraded two steps for imprecision.

cohort study reported no significant differences for suicidal behavior for individuals who received long-acting injectable antipsychotics compared with those who were receiving oral antipsychotics (García-Carmona et al. 2021).

### **Global impression and functioning**

After 12 weeks, the RCT reported no significant difference on the CGI–Severity scale between the asenapine and olanzapine groups (Bozzatello et al. 2017).

### **Incidence of adverse events, serious adverse events, and withdrawal due to adverse events**

In the RCT, the incidence of adverse events was nearly equal in both groups (five in the olanzapine group and four in the asenapine group). The study did not report data on the incidence of serious adverse events. Only four participants (two in each group) withdrew because of adverse events (Bozzatello et al. 2017).

## **Anticonvulsants Versus Placebo**

Nine double-blinded RCTs evaluated the efficacy of three anticonvulsant medications (divalproex sodium, lamotrigine, topiramate) compared with placebo (Crawford et al. 2018; Frankenburg and Zanarini 2002; Hollander et al. 2001; Loew et al. 2006; Moen et al. 2012; Nickel et al. 2004, 2005; Reich et al. 2009; Tritt et al. 2005). Overall, these studies provided data on 523 participants.

Two studies were rated as having a low risk of bias (Loew et al. 2006; Tritt et al. 2005), three as having a moderate risk of bias (Crawford et al. 2018; Nickel et al. 2004, 2005), and four as having a high risk of bias (Frankenburg and Zanarini 2002; Hollander et al. 2001; Moen et al. 2012; Reich et al. 2009). Reasons for ratings of high risk of bias were lack of intention-to-treat analysis and high attrition.

Four trials employed fixed-dosage designs assessing lamotrigine (200 mg/day) (Tritt et al. 2005) or topiramate (200 mg/day and 250 mg/day) (Loew et al. 2006; Nickel et al. 2004, 2005); five trials used flexible-dosage designs for divalproex sodium (Frankenburg and Zanarini 2002; Hollander et al. 2001; Moen et al. 2012) or lamotrigine (Crawford et al. 2018; Reich et al. 2009). Follow-up durations ranged from 8 weeks to 52 weeks. Four trials were funded by the pharmaceutical industry (Frankenburg and Zanarini 2002; Hollander et al. 2001; Moen et al. 2012; Reich et al. 2009); the others reported no funding or were supported by public institutions.

The majority of trial participants were female and White, and mean ages ranged from 25 years to 38 years. Participants were moderately ill at baseline, with mean scores on the ZAN-BPD ranging from 11.3 to 20.2. Studies, in general, excluded patients with psychiatric comorbidities such as schizophrenia, MDD, alcohol or substance use disorder, and bipolar disorder. An exception was the trial by Frankenburg and Zanarini (2002), which included participants with BPD and bipolar disorder.

Detailed information on main study characteristics and treatment effects is presented in Appendix D. Table C–28 presents certainty-of-evidence ratings.

### **Severity of borderline personality disorder**

#### *Divalproex sodium*

A small RCT ( $N=15$ ; Moen et al. 2012), rated as having a high risk of bias, assessed the efficacy of divalproex sodium ER compared with placebo in participants who were already receiving 12-week DBT, which included individual therapy sessions, a skills training group, and telephone coaching calls. The study reported no significant differences between participants receiving divalproex sodium ER or placebo on the BEST scale after 12 weeks of treatment.

**TABLE C-28. Certainty-of-evidence ratings of outcomes comparing anticonvulsants with placebo**

| Outcomes                                                                                      | Participants, <i>N</i> (studies)                                    | Certainty of the evidence (GRADE)                                | Relative effect (95% CI)      | Anticipated absolute effects            |                                                        |
|-----------------------------------------------------------------------------------------------|---------------------------------------------------------------------|------------------------------------------------------------------|-------------------------------|-----------------------------------------|--------------------------------------------------------|
|                                                                                               |                                                                     |                                                                  |                               | Effect with placebo                     | Difference in effect with anticonvulsants              |
| <b>Divalproex sodium</b>                                                                      |                                                                     |                                                                  |                               |                                         |                                                        |
| <i>Severity of BPD</i>                                                                        |                                                                     |                                                                  |                               |                                         |                                                        |
| Assessed with BEST<br>Follow-up: mean 12 weeks                                                | 15 (one RCT: Moen et al. 2012)                                      | ⊕○○○; VERY LOW <sup>a,b</sup> for no effect of divalproex sodium | –                             | Mean score at endpoint=30.0             | Mean 1.3 lower (ns)                                    |
| <i>Aggression</i>                                                                             |                                                                     |                                                                  |                               |                                         |                                                        |
| Assessed with MOAS; SCL-90-R subscale for anger and hostility<br>Follow-up: range 10–24 weeks | 46 (two RCTs: Frankenburg and Zanarini 2002; Hollander et al. 2001) | ⊕○○○; VERY LOW <sup>a,c,d</sup> for effect of divalproex sodium  | –                             | Mean score on MOAS=3.2 *                | Mean 0.6 lower ( <i>P</i> =0.03)                       |
| <i>Impulsiveness</i>                                                                          |                                                                     |                                                                  |                               |                                         |                                                        |
| Assessed with BIS-Motor<br>Follow-up: mean 12 weeks                                           | 15 (one RCT: Moen et al. 2012)                                      | ⊕○○○; VERY LOW <sup>a,b</sup> for no effect of divalproex sodium | –                             | Mean score at endpoint=18.2             | Mean 5.7 higher (ns)                                   |
| <i>General psychopathology</i>                                                                |                                                                     |                                                                  |                               |                                         |                                                        |
| Assessed with SCL-90-R, CGI-I<br>Follow-up: range 10–12 weeks                                 | 31 (two RCTs: Hollander et al. 2001; Moen et al. 2012)              | ⊕○○○; VERY LOW <sup>a,d</sup> for no effect of divalproex sodium | –                             | Mean score at endpoint on SCL-90=114.2* | Mean 22.8 higher (ns)                                  |
| <i>Withdrawals due to adverse events</i>                                                      |                                                                     |                                                                  |                               |                                         |                                                        |
| Follow-up: range 10–24 weeks                                                                  | 46 (two RCTs: Frankenburg and Zanarini 2002; Hollander et al. 2001) | ⊕○○○; VERY LOW <sup>a,d</sup> for similar risks                  | <b>RR 0.26</b><br>(0.03–2.35) | 136 per 1,000*                          | <b>101 fewer per 1,000</b> (132 fewer to 184 more; ns) |

**TABLE C–28. Certainty-of-evidence ratings of outcomes comparing anticonvulsants with placebo (continued)**

| Outcomes                                              | Participants, <i>N</i> (studies)                                             | Certainty of the evidence (GRADE)                          | Anticipated absolute effects   |                              |                                                      |
|-------------------------------------------------------|------------------------------------------------------------------------------|------------------------------------------------------------|--------------------------------|------------------------------|------------------------------------------------------|
|                                                       |                                                                              |                                                            | Relative effect (95% CI)       | Effect with placebo          | Difference in effect with anticonvulsants            |
| <b>Lamotrigine</b>                                    |                                                                              |                                                            |                                |                              |                                                      |
| <i>Severity of BPD</i>                                |                                                                              |                                                            |                                |                              |                                                      |
| Assessed with ZAN-BPD<br>Follow-up: range 12–52 weeks | 304 (two RCTs: Crawford et al. 2018; Reich et al. 2009)                      | ⊕⊕⊕○; MODERATE <sup>e</sup> for no effect of lamotrigine   | –                              | Mean score at endpoint=11.5* | Mean 0.5 lower (ns)                                  |
| <i>Affective lability</i>                             |                                                                              |                                                            |                                |                              |                                                      |
| Assessed with ALS<br>Follow-up: mean 12 weeks         | 28 (one RCT: Reich et al. 2009)                                              | ⊕○○○; VERY LOW <sup>b,f</sup> for effect of lamotrigine    | –                              | Mean score at endpoint=1.52  | Mean 0.27 lower (P=0.012)                            |
| <i>Alcohol and substance use</i>                      |                                                                              |                                                            |                                |                              |                                                      |
| Assessed with ASSIST<br>Follow-up: mean 52 weeks      | 160 (one RCT: Crawford et al. 2018)                                          | ⊕⊕○○; LOW <sup>b</sup> for no effect of lamotrigine        | –                              | Mean score at endpoint=23    | Mean 4 higher (ns)                                   |
| <i>Anger</i>                                          |                                                                              |                                                            |                                |                              |                                                      |
| Assessed with STAXI<br>Follow-up: mean 8 weeks        | 27 (one RCT: Tritt et al. 2005)                                              | ⊕⊕○○; LOW <sup>b</sup> for effect of lamotrigine           | –                              | NR                           | NR (four of five subscales significantly improved)   |
| <i>Functioning</i>                                    |                                                                              |                                                            |                                |                              |                                                      |
| Assessed with SFQ<br>Follow-up: mean 52 weeks         | 276 (one RCT: Crawford et al. 2018)                                          | ⊕⊕⊕○; MODERATE <sup>e,g</sup> for no effect of lamotrigine | –                              | Mean score at endpoint=12.3  | Mean 0.1 higher (ns)                                 |
| <i>Incidence of adverse events</i>                    |                                                                              |                                                            |                                |                              |                                                      |
| Follow-up: range 10–52 weeks                          | 304 (two RCTs: Crawford et al. 2018; Reich et al. 2009)                      | ⊕⊕○○; LOW <sup>g</sup> for similar risks                   | <b>RR 0.86</b><br>(0.71–1.03)  | 630 per 1,000*               | <b>88 fewer per 1,000</b> (183 fewer to 19 more; ns) |
| <i>Incidence of serious adverse events</i>            |                                                                              |                                                            |                                |                              |                                                      |
| Follow-up: mean 52 weeks                              | 276 (one RCT: Crawford et al. 2018)                                          | ⊕⊕○○; LOW <sup>h</sup> for similar risks                   | <b>RR 0.82</b><br>(0.52–1.31)  | 230 per 1,000                | <b>41 fewer per 1,000</b> (111 fewer to 71 more; ns) |
| <i>Withdrawal due to adverse events</i>               |                                                                              |                                                            |                                |                              |                                                      |
| Follow-up: range 10–52 weeks                          | 328 (three RCTs: Crawford et al. 2018; Reich et al. 2009; Tritt et al. 2005) | ⊕○○○; VERY LOW <sup>h,i</sup> for similar risks            | <b>RR 3.79</b><br>(0.82–17.57) | 12 per 1,000                 | <b>35 more per 1,000</b> (2 fewer to 206 more; ns)   |

**TABLE C-28. Certainty-of-evidence ratings of outcomes comparing anticonvulsants with placebo (continued)**

| Outcomes                                            | Participants, <i>N</i> (studies)                      | Certainty of the evidence (GRADE)               | Anticipated absolute effects |                             |                                                    |
|-----------------------------------------------------|-------------------------------------------------------|-------------------------------------------------|------------------------------|-----------------------------|----------------------------------------------------|
|                                                     |                                                       |                                                 | Relative effect (95% CI)     | Effect with placebo         | Difference in effect with anticonvulsants          |
| <b>Topiramate</b>                                   |                                                       |                                                 |                              |                             |                                                    |
| <i>Anger</i>                                        |                                                       |                                                 |                              |                             |                                                    |
| Assessed with STAXI<br>Follow-up: mean 8 weeks      | 75 (two RCTs: Nickel et al. 2004; Nickel et al. 2005) | ⊕⊕○○; LOW <sup>d</sup> for effect of topiramate | –                            | NR                          | NR (four of five subscales significantly improved) |
| <i>General psychopathology</i>                      |                                                       |                                                 |                              |                             |                                                    |
| Assessed with SCL-90<br>Follow-up: range 8–12 weeks | 56 (one RCT: Loew et al. 2006)                        | ⊕⊕○○; LOW <sup>b</sup> for effect of topiramate | –                            | Mean score at endpoint=70.1 | Mean 5.9 lower ( <i>P</i> <0.001)                  |
| <i>Withdrawal due to adverse events</i>             |                                                       |                                                 |                              |                             |                                                    |
| Follow-up: mean 8 weeks                             | 75 (two RCTs: Nickel et al. 2004; Nickel et al. 2005) | ⊕○○○; VERY LOW <sup>dj</sup> for similar risks  | RR 1.95 (0.77–4.94)          | 0 per 1,000                 | 0 fewer per 1,000 (0 fewer to 0 fewer)             |

The risk in the intervention group (and its 95% CI) is based on the assumed risk in the comparison group and the relative effect of the intervention (and its 95% CI).

ALS=Affective Liability Scale; ASSIST=Alcohol, Smoking, and Substance Involvement Screening Test; BEST=Borderline Evaluation of Severity Over Time; BIS-Motor=Barratt Impulsiveness Scale-Motor; BPD=borderline personality disorder; CGI-I=Clinical Global Impressions–Improvement; CI=confidence interval; GRADE=Grading of Recommendations Assessment, Development, and Evaluation; MOAS=Modified Overt Aggression Scale; NR=not reported; ns=not significant; RCT=randomized controlled trial; RR=risk ratio; SCL-90=Symptom Checklist-90; SCL-90-R=Symptom Checklist-90-Revised; SFQ=Social Functioning Questionnaire; STAXI=State-Trait Anger Expression Inventory; ZAN-BPD=Zanarini Rating Scale for Borderline Personality Disorder.

\*Effect estimate from largest study or the study with the lowest risk of bias.

<sup>a</sup>High attrition; downgraded one step for risk of bias.

<sup>b</sup>Small study, does not meet optimal information size (i.e., number of participants in a meta-analysis); downgraded two steps for imprecision.

<sup>c</sup>Conflicting results of two studies; downgraded one step for inconsistency.

<sup>d</sup>Small studies, do not meet optimal information size (i.e., number of participants in a meta-analysis); downgraded two steps for imprecision.

<sup>e</sup>Sample size probably does not meet optimal information size (i.e., number of participants in a meta-analysis); downgraded one step for imprecision.

<sup>f</sup>Trial with high risk of bias; downgraded one step for risk of bias.

<sup>g</sup>Few events; downgraded two steps for imprecision.

<sup>h</sup>Very few events; downgraded two steps for imprecision.

<sup>i</sup>Proportions vary substantially; downgraded one step for inconsistency.

<sup>j</sup>One study does not report data on withdrawal due to adverse events; downgraded one step for outcomes reporting bias.

### *Lamotrigine*

The publicly funded Lamotrigine and Borderline Personality Disorder: Investigating Long-Term Effects (LABILE) trial ( $N=276$ ; Crawford et al. 2018), rated as having a moderate risk of bias, and a small, industry-funded RCT ( $N=28$ ; Reich et al. 2009), rated as having a high risk of bias, assessed the efficacy of lamotrigine (200–400 mg/day) compared with placebo on the ZAN-BPD. Both trials reported no significant differences between participants in the lamotrigine and the placebo groups after 12 weeks of treatment. The primary endpoint of the LABILE trial was at 52 weeks, which also yielded no significant difference on the ZAN-BPD between treatment groups (Crawford et al. 2018).

### *Topiramate*

None of the included trials reported relevant outcomes.

## **Severity of symptoms associated with borderline personality disorder**

### *Divalproex sodium*

Two small RCTs, rated as having a high risk of bias, reported results regarding the efficacy of divalproex sodium (flexible dosage to achieve serum levels of 80 mg/L and 50–100 mg/L, respectively) to reduce aggression (Frankenburg and Zanarini 2002; Hollander et al. 2001). One trial ( $N=30$ ; Frankenburg and Zanarini 2002) reported significant improvements for divalproex sodium compared with placebo on the MOAS and the SCL-90-R subscale for anger and hostility after 24 weeks of treatment. This study enrolled participants with BPD and bipolar II disorder. The other trial ( $N=16$ ; Hollander et al. 2001) also favored divalproex sodium over placebo but found no significant differences on the Aggression Questionnaire and the MOAS after 10 weeks.

Another RCT ( $N=15$ ; Moen et al. 2012), rated as having a high risk of bias, reported no significant differences between participants on divalproex sodium ER or placebo on the BIS after 12 weeks of treatment.

### *Lamotrigine*

Three trials assessed improvements of BPD-specific symptoms under lamotrigine treatment (Crawford et al. 2018; Reich et al. 2009; Tritt et al. 2005). The LABILE trial ( $N=276$ ; Crawford et al. 2018), rated as having a moderate risk of bias, reported no significant differences in alcohol or other substance use between participants treated with lamotrigine or placebo. In a Cochrane review of pharmacological treatments for BPD, the evidence for lamotrigine was assessed as being very uncertain in terms of effects on self-harm (Stoffers-Winterling et al. 2022).

An RCT in 27 female participants with BPD, rated as having a low risk of bias, showed significant improvements in anger as measured on four out of five subscales on the STAXI after 8 weeks of treatment (Tritt et al. 2005). The subscale assessing the tendency to repress anger did not improve significantly.

Likewise, a small RCT with 28 participants, rated as having a high risk of bias, reported significantly greater reductions on the Affective Lability Scale for the lamotrigine group compared with the placebo treatment group (Reich et al. 2009).

### *Topiramate*

Two RCTs ( $N=31$  [Nickel et al. 2004] and  $N=44$  [Nickel et al. 2005]), rated as having a moderate risk of bias, that had similar protocols conducted by the same author team investigated the efficacy of topiramate (titrated from 50 mg/day to 250 mg/day) to reduce anger and aggression in females and males with BPD. After 8 weeks, both women and men experienced significant improvements in four out of five subscales of the STAXI. In both trials, the subscale assessing the tendency to repress anger did not improve significantly (Nickel et al. 2004, 2005).

## Global impression and functioning

### *Divalproex sodium*

Two very small RCTs ( $N=16$  and  $N=15$ ), rated as having a high risk of bias, reported no significant differences between divalproex sodium and placebo on the CGI-Improvement scale and the SCL-90-R after 10 weeks and 12 weeks of treatment (Hollander et al. 2001; Moen et al. 2012).

### *Lamotrigine*

The LABILE trial ( $N=276$ ; Crawford et al. 2018) reported no significant differences on the Social Functioning Questionnaire between participants treated with lamotrigine or placebo after 52 weeks of treatment.

### *Topiramate*

One RCT ( $N=56$ ; Loew et al. 2006), rated as having a low risk of bias, assessed the efficacy of topiramate (titrated from 50 mg/day to 200 mg/day) in females with BPD ages 18–35 years. After 10 weeks, participants in the topiramate group had significantly greater improvements on the Global Severity Index of the SCL-90-R, the Short Form-36, and the Inventory of Interpersonal Problems.

## **Incidence of adverse events, serious adverse events, and withdrawal due to adverse events**

### *Divalproex sodium*

None of the three included studies reported on the incidence of adverse events. Two trials reported similar proportions of withdrawals due to adverse events between the divalproex sodium and the placebo treatment groups (Frankenburg and Zanarini 2002; Hollander et al. 2001).

### *Lamotrigine*

The incidence of adverse events, serious adverse events, and withdrawals due to adverse events was similar between lamotrigine and placebo treatment groups (Crawford et al. 2018; Reich et al. 2009; Tritt et al. 2005).

### *Topiramate*

None of the trials reported the incidence of adverse events or serious adverse events. Two publications stated that no participants withdrew because of adverse events during 8 weeks of treatment (Nickel et al. 2004, 2005).

A meta-analysis of anticonvulsant medications as a class rendered no significant differences in withdrawals because of adverse events after 8–52 weeks of treatment (Figure C-4).

## **Grading of the overall supporting body of research evidence for benefits of divalproex in borderline personality disorder**

- *Magnitude of effect:* Minimal. There was a very small benefit of divalproex on aggression but no effect on other outcomes.
- *Risk of bias:* High. Of the RCT studies of divalproex, both had a high risk of bias.
- *Applicability:* Studies were conducted in the United States and included individuals with a diagnosis of BPD but excluded individuals with co-occurring disorders or those who were suicidal. Demographically, the study samples were primarily young adult White females, but a mix of races and ethnicities were included. Medication dosages that were studied were smaller than in usual clinical practice, limiting the generalizability of the findings.



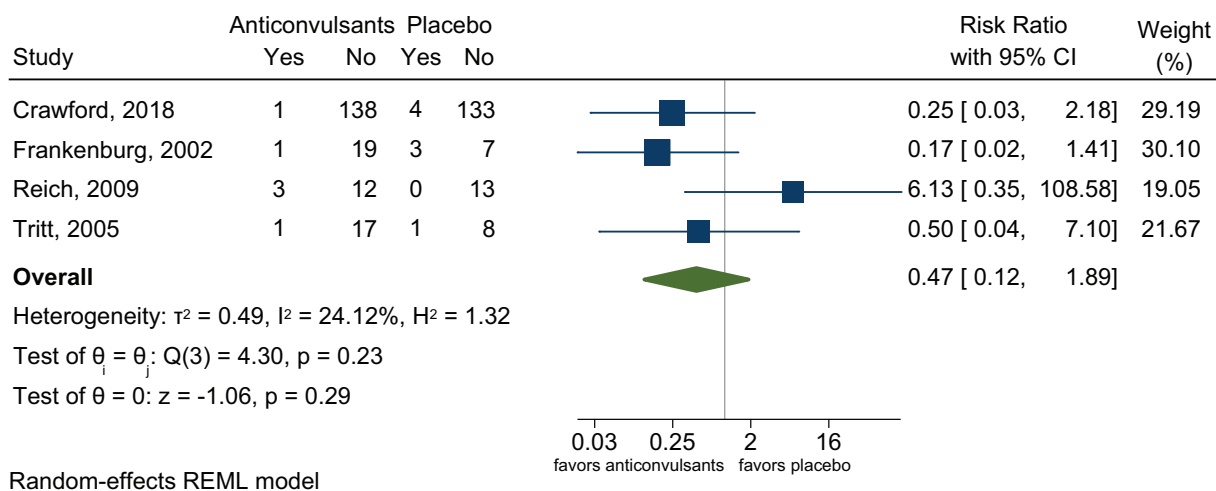

**FIGURE C-4.** Random effects meta-analysis of withdrawal due to adverse events comparing anticonvulsant medications with placebo.

CI=confidence interval; REML=restricted maximum likelihood.

Source. Crawford et al. 2018; Frankenburg and Zanarini 2002; Reich et al. 2009; Tritt et al. 2005.

- *Directness:* Indirect. Outcomes in one study were not well delineated; in the other study, outcomes were either global or addressed aggressive behavior.
- *Consistency:* Consistent. Studies were generally consistent and, with the exception of aggressive behavior in one study, showed significant effects of divalproex.
- *Precision:* Imprecise. The optimal information size (i.e., the number of participants in a meta-analysis) was not met due to small samples, and the certainty of evidence was downgraded for imprecision.
- *Dose-response relationship:* Unable to be assessed. Studies did not include information on dose-response relationships.
- *Confounding factors (including likely direction of effect):* Not identified. No specific confounding effects were noted, but some may have been present due to the high risk of bias in the study design.
- *Publication bias:* Unable to be assessed. The small number of studies makes it difficult to assess publication bias. However, publication bias seems possible because of the tendency for negative clinical trial results to go unpublished.
- *Overall strength of research evidence:* Low. There is a high risk of bias in both studies, inconsistency of some of the findings, and limits on the applicability of the studies to typical clinical practice.

### Grading of the overall supporting body of research evidence for harms of divalproex in borderline personality disorder

- *Magnitude of effect:* None noted. Study withdrawal rates due to adverse effects were comparable for placebo and divalproex in one study. No data on adverse effects was reported in the other study.
- *Risk of bias:* High. Of the RCT studies of divalproex, both had a high risk of bias.
- *Applicability:* Studies were conducted in the United States and included individuals with a diagnosis of BPD but excluded individuals with co-occurring disorders or those who were suicidal. Demographically, the study samples were primarily young adult White females, but a mix of races and ethnicities were included. Medication dosages that were studied were smaller than in usual clinical practice, limiting the generalizability of the findings.

- *Directness*: Indirect. Outcomes in one study were not well delineated; in the other study, outcomes were either global or addressed aggressive behavior.
- *Consistency*: Consistent. Studies were generally consistent and, with the exception of aggressive behavior in one study, showed significant effects of divalproex.
- *Precision*: Imprecise. The optimal information size (i.e., the number of participants in a meta-analysis) was not met due to small samples, and the certainty of evidence was downgraded for imprecision.
- *Dose-response relationship*: Unable to be assessed. Studies did not include information on dose-response relationships.
- *Confounding factors (including likely direction of effect)*: Not identified. No specific confounding effects were noted, but some may have been present due to the high risk of bias in the study design.
- *Publication bias*: Unable to be assessed. The small number of studies makes it difficult to assess publication bias. However, publication bias seems possible because of the tendency for negative clinical trial results to go unpublished.
- *Overall strength of research evidence*: Low. There is a high risk of bias in both studies, inconsistency of some of the findings, and limits on the applicability of the studies to typical clinical practice.

### **Grading of the overall supporting body of research evidence for benefits of lamotrigine in borderline personality disorder**

- *Magnitude of effect*: Minimal. There was a very small benefit of lamotrigine on affective lability and anger, in one small study each, but no effect on other outcomes. In one large study that assessed BPD severity and functioning, lamotrigine had no significant effect.
- *Risk of bias*: Moderate. Of the RCT studies of lamotrigine, the largest study had a moderate risk of bias, whereas the two smaller studies had a low and a high risk of bias.
- *Applicability*: Studies were conducted in the United States, the United Kingdom, Germany, and Austria. They included individuals with a diagnosis of BPD, but the smaller studies excluded individuals with co-occurring disorders or those who were suicidal. Demographically, the study samples were primarily young adult White females, but in the largest study 25% of participants were male and 11% non-White race. Medication dosages that were studied were comparable with those used in usual clinical practice.
- *Directness*: Direct. The primary outcome in the largest study was BPD severity, although the smaller studies had indirect measures of anger and affective lability as primary outcomes.
- *Consistency*: Inconsistent. The smaller studies showed some benefits on affective lability and anger, whereas the larger study showed no effect of lamotrigine on BPD severity, self-harm, or functioning.
- *Precision*: Imprecise. The optimal information size (i.e., number of participants in a meta-analysis) was not met due to small samples in two studies, and the certainty of evidence was downgraded for imprecision.
- *Dose-response relationship*: Unable to be assessed. Studies did not include information on dose-response relationships.
- *Confounding factors (including likely direction of effect)*: Not identified. No specific confounding effects were noted.
- *Publication bias*: Unable to be assessed. The small number of studies makes it difficult to assess publication bias. However, publication bias seems possible because of the tendency for negative clinical trial results to go unpublished.
- *Overall strength of research evidence*: Low. For most outcomes, data were only available from a single study. There was also inconsistency of some of the findings and variability in the risk of bias in the studies.

## Grading of the overall supporting body of research evidence for harms of lamotrigine in borderline personality disorder

- *Magnitude of effect:* None detected. There was a similar effect of lamotrigine on withdrawal due to adverse effects as well as on the incidence of adverse effects and serious adverse effects.
- *Risk of bias:* Moderate. Of the RCT studies of lamotrigine, the largest study had a moderate risk of bias, whereas the two smaller studies had a low and a high risk of bias.
- *Applicability:* Studies were conducted in the United States, the United Kingdom, Germany, and Austria. They included individuals with a diagnosis of BPD, but the smaller studies excluded individuals with co-occurring disorders or those who were suicidal. Demographically, the study samples were primarily young adult White females, but in the largest study 25% of participants were male and 11% non-White race. Medication dosages that were studied were comparable with those used in usual clinical practice.
- *Directness:* Direct. The studies measured the incidence of adverse effects and serious adverse effects.
- *Consistency:* Consistent. The studies were consistent in showing a comparable incidence of adverse effects and serious adverse effects as well as similar rates of study withdrawal due to adverse effects.
- *Precision:* Imprecise. The optimal information size (i.e., number of participants in a meta-analysis) was not met due to small samples in two studies, and the certainty of evidence was downgraded for imprecision.
- *Dose-response relationship:* Unable to be assessed. Studies did not include information on dose-response relationships.
- *Confounding factors (including likely direction of effect):* Not identified. No specific confounding effects were noted.
- *Publication bias:* Unable to be assessed. The small number of studies makes it difficult to assess publication bias. However, publication bias seems possible because of the tendency for negative clinical trial results to go unpublished.
- *Overall strength of research evidence:* Low. Based on the variability in the risk of bias in the studies and imprecision, the overall strength of research evidence was rated as low.

## Grading of the overall supporting body of research evidence for benefits of topiramate in borderline personality disorder

- *Magnitude of effect:* Minimal. There was a very small benefit of topiramate on general psychopathology in one small study and anger in two small studies.
- *Risk of bias:* Moderate. Of the RCT studies of topiramate, two had a moderate risk of bias and one had a low risk of bias.
- *Applicability:* Studies were conducted in Germany and Austria. They included individuals with a diagnosis of BPD, but the smaller studies excluded individuals with co-occurring disorders or those who were suicidal. Demographically, the study samples were primarily young adults, with only females in two studies and only males in the third study. No data were obtained on race or ethnicity. Medication dosages that were studied were comparable with those used in usual clinical practice.
- *Directness:* Indirect. The primary outcomes were symptom measures but not specific to BPD severity or functioning.
- *Consistency:* Consistent. The studies were consistent in showing some minimal benefits of topiramate.
- *Precision:* Imprecise. The optimal information size (i.e., number of participants in a meta-analysis) was not met due to small samples, and the certainty of evidence was downgraded for imprecision.

- *Dose-response relationship*: Unable to be assessed. Studies did not include information on dose-response relationships.
- *Confounding factors (including likely direction of effect)*: Not identified. No specific confounding effects were noted.
- *Publication bias*: Unable to be assessed. The small number of studies makes it difficult to assess publication bias. However, publication bias seems possible because of the tendency for negative clinical trial results to go unpublished.
- *Overall strength of research evidence*: Low. Two of the studies had a moderate risk of bias, results were downgraded for imprecision, and there were significant issues with applicability of the study samples.

### **Grading of the overall supporting body of research evidence for harms of topiramate in borderline personality disorder**

- *Magnitude of effect*: None noted. No study withdrawals due to adverse effects were noted in the two studies that examined this outcome.
- *Risk of bias*: Moderate. Of the RCT studies of topiramate, two had a moderate risk of bias and one had a low risk of bias.
- *Applicability*: Studies were conducted in Germany and Austria. They included individuals with a diagnosis of BPD, but the smaller studies excluded individuals with co-occurring disorders or those who were suicidal. Demographically, the study samples were primarily young adults, with only females in two studies and only males in the third study. No data were obtained on race or ethnicity. Medication dosages that were studied were comparable with those used in usual clinical practice.
- *Directness*: Indirect. The primary outcome related to adverse effects was study withdrawals.
- *Consistency*: Consistent. The two studies that measured withdrawals due to adverse effects were consistent in showing no study withdrawals for this reason.
- *Precision*: Imprecise. The optimal information size (i.e., number of participants in a meta-analysis) was not met due to small samples, and the certainty of evidence was downgraded for imprecision.
- *Dose-response relationship*: Unable to be assessed. Studies did not include information on dose-response relationships.
- *Confounding factors (including likely direction of effect)*: Not identified. No specific confounding effects were noted.
- *Publication bias*: Unable to be assessed. The small number of studies makes it difficult to assess publication bias. However, publication bias seems possible because of the tendency for negative clinical trial results to go unpublished.
- *Overall strength of research evidence*: Low. Two of the studies had a moderate risk of bias, results were downgraded for imprecision, and there were significant issues with applicability of the study samples.

### **Second-Generation Antidepressants Versus Placebo**

One industry-funded RCT ( $N=25$ ; Simpson et al. 2004), rated as having a high risk of bias, assessed differences in efficacy between fluoxetine (20–40 mg/day) and placebo. The study duration was 12 weeks. All trial participants were female; the majority were White. Participants in both treatment groups received individual DBT and were part of 2-hour weekly skills groups.

Detailed information on main study characteristics and treatment effects is presented in Appendix D. Table C–29 presents certainty-of-evidence ratings.

**TABLE C–29. Certainty-of-evidence ratings of outcomes comparing second-generation antidepressants with placebo**

| Outcomes                                        | Participants, <i>N</i> ( <i>studies</i> ) | Certainty of the evidence (GRADE)                               | Anticipated absolute effects |                                |                                                        |
|-------------------------------------------------|-------------------------------------------|-----------------------------------------------------------------|------------------------------|--------------------------------|--------------------------------------------------------|
|                                                 |                                           |                                                                 | Relative effect (95% CI)     | Effect with placebo            | Difference in effect second-generation antidepressants |
| Anger                                           |                                           |                                                                 |                              |                                |                                                        |
| Assessed with STAXI<br>Follow-up: mean 10 weeks | 25 (one RCT: Simpson et al. 2004)         | ⊕○○○; VERY LOW <sup>a,b</sup><br>for no effect of<br>fluoxetine | –                            | Mean score at<br>endpoint=27.6 | Mean 7.1 lower (ns)                                    |
| Aggression                                      |                                           |                                                                 |                              |                                |                                                        |
| Assessed with MOAS<br>Follow-up: mean 10 weeks  | 25 (one RCT: Simpson et al. 2004)         | ⊕○○○; VERY LOW <sup>a,b</sup><br>for no effect of<br>fluoxetine | –                            | Mean score at<br>endpoint=NR   | NR (ns)                                                |
| Functioning                                     |                                           |                                                                 |                              |                                |                                                        |
| Assessed with GAF<br>Follow-up: mean 10 weeks   | 25 (one RCT: Simpson et al. 2004)         | ⊕○○○; VERY LOW <sup>a,b</sup><br>for no effect of<br>fluoxetine | –                            | Mean score at<br>endpoint=59.3 | Mean 0.6 higher (ns)                                   |

The risk in the intervention group (and its 95% CI) is based on the assumed risk in the comparison group and the relative effect of the intervention (and its 95% CI).  
CI=confidence interval; GAF=Global Assessment of Functioning; GRADE=Grading of Recommendations Assessment, Development, and Evaluation; MOAS=Modified Overt Aggression Scale; NR=not reported; ns=not significant; RCT=randomized controlled trial; STAXI=State-Trait Anger Expression Inventory.

<sup>a</sup>No intention-to-treat analysis; downgraded one step for risk of bias.

<sup>b</sup>Small study, does not meet optimal information size (i.e., number of participants in a meta-analysis); downgraded two steps for imprecision.

### **Severity of borderline personality disorder**

The study did not report any relevant outcomes.

### **Severity of symptoms associated with borderline personality disorder**

After a mean of 10 weeks, authors reported no significant difference between fluoxetine and placebo on the STAXI and the MOAS (Simpson et al. 2004).

### **Global impression and functioning**

After 10 weeks, there were no significant differences between both groups in the GAF scale (Simpson et al. 2004).

### **Incidence of adverse events, serious adverse events, and withdrawal due to adverse events**

The study did not report any relevant adverse events.

### **Grading of the overall supporting body of research evidence for antidepressants in borderline personality disorder**

Only a single study met inclusion criteria related to antidepressants in BPD and, thus, no grading of the body of research evidence is possible.

## Repetitive Transcranial Magnetic Stimulation Versus Sham Treatment

One RCT ( $N=9$ ; Cailhol et al. 2014), rated as having a moderate risk of bias, assessed differences in efficacy between 10 sessions of repetitive transcranial magnetic stimulation (rTMS) and sham rTMS. The study duration was 3 months. The majority of trial participants were females between 20 years and 45 years of age, with race being unreported. The severity of disease at baseline was reported by the BPD Severity Index. The study was publicly funded. Detailed information on main study characteristics and treatment effects is presented in Appendix D.

### **Severity of borderline personality disorder**

After 3 months, there were no significant differences on the BPD Severity Index between the rTMS and the sham rTMS groups (Cailhol et al. 2014).

### **Severity of symptoms associated with borderline personality disorder**

The study did not report any relevant outcomes (Cailhol et al. 2014).

### **Global impression and functioning**

After 3 months, differences on the SCL-90 and the Global Assessment Scale favored rTMS over sham treatment, but the difference did not reach statistical significance because of the small sample size ( $N=9$ ) (Cailhol et al. 2014).

### **Incidence of adverse events, serious adverse events, and withdrawal due to adverse events**

The study did not report data on the incidence of adverse or serious adverse events. No participants withdrew due to adverse events (Cailhol et al. 2014).

### **Grading of the overall supporting body of research evidence for repetitive transcranial magnetic stimulation in borderline personality disorder**

Only a single study met inclusion criteria related to rTMS in BPD and, thus, no grading of the body of research evidence is possible.

## Statement 8 – Pharmacotherapy Review

APA *recommends* (1C) that a patient with borderline personality disorder receive a review and reconciliation of their medications at least every 6 months to assess the effectiveness of treatment and identify medications that warrant tapering or discontinuation.

Evidence for this statement comes from general principles of clinical care in psychiatric practice. In addition, medication reconciliation and de-prescribing, where indicated, are recommended best practices in hospital as well as outpatient settings (Institute for Safe Medication Practice 2023; The Joint Commission 2022). A detailed systematic review to support this statement is outside the scope of this guideline; however, less comprehensive searches of the literature did not yield any studies related to this recommendation in the context of BPD treatment. Consequently, the strength of research evidence is rated as low.

### Grading of the Overall Supporting Body of Research Evidence for Pharmacotherapy Review in Patients With Borderline Personality Disorder

On the basis of the limitations of the evidence for pharmacotherapy review in patients with possible BPD, no grading of the body of research evidence is possible.

APPENDIX D

**Evidence Tables for Individual  
Studies Supporting Guideline  
Statements**



## Psychoeducation vs. Wait-list

**TABLE D-1. Study characteristics and main results of psychoeducation compared with WL control**

| Author (year) and/or trial name | Study characteristics                                                                     | Participants, <i>N</i> ; interventions; duration                                                                                     | Study population, including main inclusion and exclusion criteria                                                                                                                                                                                                                                            | Sample demographics                                                                                                                                                             | Primary outcome; main results; attrition                                                                                                                                                                                                                                                                                                                                                                                          | Risk of bias |
|---------------------------------|-------------------------------------------------------------------------------------------|--------------------------------------------------------------------------------------------------------------------------------------|--------------------------------------------------------------------------------------------------------------------------------------------------------------------------------------------------------------------------------------------------------------------------------------------------------------|---------------------------------------------------------------------------------------------------------------------------------------------------------------------------------|-----------------------------------------------------------------------------------------------------------------------------------------------------------------------------------------------------------------------------------------------------------------------------------------------------------------------------------------------------------------------------------------------------------------------------------|--------------|
| Zanarini and Frankenburg (2008) | Design: RCT<br>Setting: NR<br>Country: United States<br>Funding: Eli Lilly                | <i>N</i> =50<br>G1 (20): Delayed psychoeducation<br>G2 (30): Psychoeducation<br>Duration: 12 weeks                                   | Inclusion: Females; ages 18–30 years; met DIB-R and DSM-IV criteria for BPD<br>Exclusion: Currently in any type of psychiatric treatment; schizophrenia, schizoaffective disorder, bipolar I disorder, or SUD                                                                                                | Mean age, <i>years</i> ( <i>SD</i> ): 19 (1.4)<br>Female: 100%<br>Race/ethnicity:<br>White: 86%                                                                                 | Primary outcome: NR<br>No significant difference between G1 and G2 on ZAN-BPD<br>Incidence of AEs: NR<br>Withdrawal due to AEs: NR<br>Attrition: 0<br>Differential attrition: <10 percentage points                                                                                                                                                                                                                               | Moderate     |
| Zanarini et al. (2018)          | Design: RCT<br>Setting: NR<br>Country: United States<br>Funding: NIMH, government funding | <i>N</i> =80<br>G1 (40): No Psychoeducation<br>G2 (40): Internet-based psychoeducation<br>Duration: 12 weeks<br>Follow-up: 12 months | Inclusion: Met DIB-R and DSM-IV criteria for BPD<br>Exclusion: Schizophrenia, schizoaffective disorder, or intellectual disability; acutely suicidal or fully manic at time of assessment; current physical condition that can cause serious psychiatric symptoms (e.g., lupus, MS); serious substance abuse | Mean age, <i>years</i> ( <i>SD</i> ):<br>G1: 21 (3.1)<br>G2: 22 (3.7)<br>Female: 100%<br>Race/ethnicity:<br>White: 69%<br>Black: 11%<br>Hispanic: 10%<br>Asian: 8%<br>Other: 3% | Primary outcome: NR<br>G2 significantly more effective than G1 on SAS (0.5 vs. 0.09, <i>P</i> =0.049) after 12 weeks<br>G2 significantly more effective than G1 on ZAN-BPD scale after 12 months (4.46 vs. 0.0, <i>P</i> =0.035); no significant differences on any other outcome measures after 12 months<br>Incidence of AEs: NR<br>Withdrawal due to AEs: NR<br>Attrition: 4%<br>Differential attrition: <10 percentage points | Moderate     |

AE=adverse event; BPD=borderline personality disorder; DIB-R=Diagnostic Interview for Borderlines-Revised; DSM-IV=*Diagnostic and Statistical Manual of Mental Disorders*, 4th Edition; G1=Group 1; G2=Group 2; MS=multiple sclerosis; *N*=sample size; NIMH=National Institute of Mental Health; NR=not reported; RCT=randomized controlled trial; SAS=Social Adjustment Scale; SD=standard deviation; SUD=substance use disorder; WL=wait-list; ZAN-BPD=Zanarini Rating Scale for Borderline Personality Disorder.

## Psychosocial Interventions

## Interpersonal Psychotherapy vs. Wait-List Plus Clinical Management

TABLE D-2. Study characteristics and main results of IPT compared with WL plus clinical management

| Author (year) and/or trial name | Study characteristics                                                                      | Participants, <i>N</i> ; interventions; duration                                                                                                                                                                       | Study population, including main inclusion and exclusion criteria                                                                                                                                                                                                                                                                                                                                  | Sample demographics                                 | Primary outcome; main results; attrition                                                                                                                                                                                                                                                                                                                                                                                                   | Risk of bias |
|---------------------------------|--------------------------------------------------------------------------------------------|------------------------------------------------------------------------------------------------------------------------------------------------------------------------------------------------------------------------|----------------------------------------------------------------------------------------------------------------------------------------------------------------------------------------------------------------------------------------------------------------------------------------------------------------------------------------------------------------------------------------------------|-----------------------------------------------------|--------------------------------------------------------------------------------------------------------------------------------------------------------------------------------------------------------------------------------------------------------------------------------------------------------------------------------------------------------------------------------------------------------------------------------------------|--------------|
| Bozzatello and Bellino (2020)   | Design: RCT<br>Setting: Outpatient, single center<br>Country: Italy<br>Funding: Government | <i>N</i> =43<br>G1 (21): WL plus clinical management<br>G2 (22): IPT adapted for treating BPD: 50-minute sessions over 40 weeks; 22 sessions in first 20 weeks and 20 sessions in last 20 weeks<br>Duration: 10 months | Inclusion: Ages 18–60 years; attended Center for Personality Disorders and met DSM-5 criteria for BPD<br>Exclusion: Dementia or other cognitive disorders, schizophrenia or other psychotic disorders, or bipolar disorders; co-occurring MDE and/or substance abuse; taken psychotropic medications and/or psychotherapy 3 months previously; females of childbearing age not using birth control | Median age: 35<br>Female: 67%<br>Race/ethnicity: NR | Primary outcome: NR<br>G2 significantly lower severity of BPD on BPDSI (36.1 vs. 44.6, <i>P</i> =0.01), symptom scores on BIS-11 (64.8 vs. 77.4, <i>P</i> =0.03), and functioning scores on CGI-S (3.1 vs. 4.1, <i>P</i> =0.009) and SOFAS (68.2 vs. 57.1, <i>P</i> =0.02) than G1 after 10 months, but not on SHI<br>Incidence of AEs: NR<br>Withdrawal due to AEs: NR<br>Attrition: 14%<br>Differential attrition: ≤10 percentage points | Moderate     |

AE=adverse event; BIS-11=Barratt Impulsiveness Scale–version 11; BPD=borderline personality disorder; BPDSI=Borderline Personality Disorder Severity Index; CGI-S=Clinical Global Impression-Severity; DSM-5=*Diagnostic and Statistical Manual of Mental Disorders*, 5th Edition; G1=Group 1; G2=Group 2; IPT=interpersonal psychotherapy; MDE=major depressive episode; *N*=sample size; NR=not reported; RCT=randomized controlled trial; SHI=Self-Harm Inventory; SOFAS=Social Occupational Functioning Assessment Scale; WL=wait-list.

## Interpersonal Psychotherapy Plus Fluoxetine vs. Clinical Management Plus Fluoxetine

**TABLE D-3. Study characteristics and main results of IPT plus fluoxetine compared with clinical management plus fluoxetine**

| Author (year) and/or trial name | Study characteristics                                                                | Participants, <i>N</i> ; interventions; duration                                                                                                                                                                                                                                                                                               | Study population, including main inclusion and exclusion criteria                                                                                                                                                                                                                                                                                                                       | Sample demographics                                                                                                        | Primary outcome; main results; attrition                                                                                                                                                                                                                                                                                                                                | Risk of bias |
|---------------------------------|--------------------------------------------------------------------------------------|------------------------------------------------------------------------------------------------------------------------------------------------------------------------------------------------------------------------------------------------------------------------------------------------------------------------------------------------|-----------------------------------------------------------------------------------------------------------------------------------------------------------------------------------------------------------------------------------------------------------------------------------------------------------------------------------------------------------------------------------------|----------------------------------------------------------------------------------------------------------------------------|-------------------------------------------------------------------------------------------------------------------------------------------------------------------------------------------------------------------------------------------------------------------------------------------------------------------------------------------------------------------------|--------------|
| Bellino et al. (2006)           | Design: RCT<br>Setting: Outpatient, single center<br>Country: Italy<br>Funding: None | <i>N</i> =39<br>G1 (19): Clinical management plus fluoxetine 20–40 mg/day; initial fixed 20 mg/day with opportunity to increase to 40 mg/day beginning week 2<br>G2 (20): IPT in weekly 1-hour sessions plus fluoxetine 20–40 mg/day; initial fixed 20 mg/day with opportunity to increase to 40 mg/day beginning week 2<br>Duration: 24 weeks | Inclusion: DSM-IV BPD diagnosis; met criteria for MDE<br>Exclusion: Lifetime diagnosis of delirium, dementia, amnesic or other cognitive disorders, or schizophrenia or other psychotic disorders; MDE as expression of bipolar disorder; current SUD; treatment with psychotropic medication or psychotherapy during 2 months prior to study; females not using adequate birth control | Mean age, <i>years</i> ( <i>SD</i> ): 26 (3.7)<br>Female: 60% (reported as ratio of men:women = 3:5)<br>Race/ethnicity: NR | Primary outcome: NR<br>G2 significantly more effective than G1 for improving symptoms of depression (measured by Ham-D [9.1 vs. 12, <i>P</i> =0.005])<br>No significant differences between G2 and G1 for anxiety for clinical global impressions (measured by CGI-S) or anxiety (measured by Ham-A)<br>Attrition: 17.9% (7/39)<br>G1: 20.0% (4/20)<br>G2: 15.8% (3/19) | Moderate     |

**TABLE D-3. Study characteristics and main results of IPT plus fluoxetine compared with clinical management plus fluoxetine (continued)**

| Author (year) and/or trial name | Study characteristics                                                                | Participants, <i>N</i> ; interventions; duration                                                                                                                                                                                                                                                                                                                                                                                                                                                 | Study population, including main inclusion and exclusion criteria                                                                                                                                                                                                                                                                                                                    | Sample demographics                                                                                        | Primary outcome; main results; attrition                                                                                                                                       | Risk of bias |
|---------------------------------|--------------------------------------------------------------------------------------|--------------------------------------------------------------------------------------------------------------------------------------------------------------------------------------------------------------------------------------------------------------------------------------------------------------------------------------------------------------------------------------------------------------------------------------------------------------------------------------------------|--------------------------------------------------------------------------------------------------------------------------------------------------------------------------------------------------------------------------------------------------------------------------------------------------------------------------------------------------------------------------------------|------------------------------------------------------------------------------------------------------------|--------------------------------------------------------------------------------------------------------------------------------------------------------------------------------|--------------|
| Bellino et al. (2010)           | Design: RCT<br>Setting: Outpatient, single center<br>Country: Italy<br>Funding: None | <i>N</i> =55<br>G1 (28): Clinical management plus fluoxetine 20–40 mg/day; initial fixed 20 mg/day with ability to increase to maximum of 40 mg/day beginning in week 2, plus 15–20 minutes of clinical management every 2 weeks dealing with clinical issues<br>G2 (27): IPT plus fluoxetine 20–40 mg/day; initial fixed 20 mg/day with ability to increase to maximum of 40 mg/day beginning in week 2, plus IPT adapted to BPD according to Markowitz's model (IPT-BPD)<br>Duration: 32 weeks | Inclusion: DSM-IV-TR BPD diagnosis<br>Exclusion: Lifetime diagnosis of delirium, amnestic disorder, other cognitive disorders, schizophrenia or other psychotic disorders, bipolar disorder, or Axis I or II disorders; those receiving psychotropic medication in past 2 months and/or psychotherapy in past 6 months; females of childbearing age not using adequate birth control | Mean age, <i>years</i> ( <i>SD</i> ):<br>G1: 26 (7.2)<br>G2: 26 (6.4)<br>Female: 67%<br>Race/ethnicity: NR | Primary outcome: NR<br>No significant differences between G2 and G1 on BPDSI, Ham-A, Ham-D, CGI-S, and SOFAS<br>Attrition: 20% (11/55)<br>G1: 21.4% (6/28)<br>G2: 18.5% (5/27) | Moderate     |

BPD=borderline personality disorder; BPDSI=Borderline Personality Disorder Severity Index; CGI-S=Clinical Global Impression-Severity; DSM-IV=*Diagnostic and Statistical Manual of Mental Disorders*, 4th Edition; DSM-IV-TR=*Diagnostic and Statistical Manual of Mental Disorders*, 4th Edition, Text Revision; G1=Group 1; G2=Group 2; Ham-A=Hamilton Rating Scale for Anxiety; Ham-D=Hamilton Rating Scale for Depression; IPT=interpersonal psychotherapy; MDE=major depressive episode; *N*=sample size; NR=not reported; RCT=randomized controlled trial; SD=standard deviation; SOFAS=Social Occupational Functioning Assessment Scale; SUD=substance use disorder.

## Acceptance and Commitment Therapy vs. Treatment as Usual

**TABLE D-4. Study characteristics and main results of ACT compared with TAU**

| Author (year) and/or trial name | Study characteristics                                                                | Participants, <i>N</i> ; interventions; duration                                                                                                                                                    | Study population, including main inclusion and exclusion criteria                                                                                                                                                                                                                                                                                                                                                                                                                                                 | Sample demographics                                                                                        | Primary outcome; main results; attrition                                                                                                                                                                                                                                                                                                                    | Risk of bias |
|---------------------------------|--------------------------------------------------------------------------------------|-----------------------------------------------------------------------------------------------------------------------------------------------------------------------------------------------------|-------------------------------------------------------------------------------------------------------------------------------------------------------------------------------------------------------------------------------------------------------------------------------------------------------------------------------------------------------------------------------------------------------------------------------------------------------------------------------------------------------------------|------------------------------------------------------------------------------------------------------------|-------------------------------------------------------------------------------------------------------------------------------------------------------------------------------------------------------------------------------------------------------------------------------------------------------------------------------------------------------------|--------------|
| Morton et al. (2012)            | Design: RCT<br>Setting: Outpatient, multicenter<br>Country: Australia<br>Funding: NR | <i>N</i> =41<br>G1 (20): TAU; case management provided mostly by public mental health services<br>G2 (21): ACT; 12 group sessions in psycho-educational format (2 hours/week)<br>Duration: 13 weeks | Inclusion: Met four or more criteria for BPD (DSM-IV Axis I and Axis II diagnoses using SCID-I and SCID-II, respectively); registered client of public sector adult MHS<br>Exclusion: Current positive or negative psychotic symptoms other than reactive psychotic symptoms associated with BPD; significant risk of violent and/or threatening behavior toward other participants; intellectual disability, cognitive impairment, or difficulty speaking English, severe enough to interfere with participation | Mean age, <i>years</i> ( <i>SD</i> ):<br>G1: 34 (9.0)<br>G2: 36 (9.3)<br>Female: 93%<br>Race/ethnicity: NR | Primary outcome: BEST at 13 weeks<br>G2 significantly more effective than G1 on BEST (-11.8 vs. -2.4, $P=0.028$ ), BHS (-4.7 vs. +0.7 <sup>a</sup> , $P=0.006$ ), and DERS (-18.7 vs. +5.6 <sup>a</sup> , $P=0.008$ )<br>Incidence of AEs: NR<br>Withdrawal due to AEs: NR<br>Attrition: 22%<br>Differential attrition:<br>G1: 30% (6/20)<br>G2: 14% (3/21) | Moderate     |

ACT=acceptance and commitment therapy; AE=adverse event; BEST=Borderline Evaluation of Severity Over Time; BHS=Beck Hopelessness Scale; BPD=borderline personality disorder; DERS=Difficulty in Emotion Regulation Scale; DSM-IV=*Diagnostic and Statistical Manual of Mental Disorders*, 4th Edition; G1=Group 1; G2=Group 2; MHS=mental health service; *N*=sample size; NR=not reported; RCT=randomized controlled trial; SCID-I=Structured Clinical Interview for DSM-IV Axis I Disorders; SCID-II=Structured Clinical Interview for DSM-IV Axis II Disorders; SD=standard deviation; TAU=treatment as usual.

<sup>a</sup>Control group worsened over time, hence the positive change on the scale.

## Manual-Assisted Cognitive Therapy vs. Treatment as Usual

**TABLE D-5. Study characteristics and main results of MACT compared with TAU**

| Author (year) and/or trial name | Study characteristics                                                                                     | Participants, <i>N</i> ; interventions; duration                                                                                                                               | Study population, including main inclusion and exclusion criteria                                                                                                                                                                                                                                                                                     | Sample demographics                                                                                                                    | Primary outcome; main results; attrition                                                                                                                                                                                                                               | Risk of bias |
|---------------------------------|-----------------------------------------------------------------------------------------------------------|--------------------------------------------------------------------------------------------------------------------------------------------------------------------------------|-------------------------------------------------------------------------------------------------------------------------------------------------------------------------------------------------------------------------------------------------------------------------------------------------------------------------------------------------------|----------------------------------------------------------------------------------------------------------------------------------------|------------------------------------------------------------------------------------------------------------------------------------------------------------------------------------------------------------------------------------------------------------------------|--------------|
| Weinberg et al. (2006)          | Design: RCT<br>Setting: Outpatient, single center<br>Country: United States<br>Funding: Other, foundation | <i>N</i> =30<br>G1 (15): TAU<br>G2 (15): MACT: Six sessions adjunctive to ongoing TAU, modified to focus on deliberate self-harm in BPD patients<br>Six sessions (duration NR) | Inclusion: Females; ages 18–40 years; met DSM-IV and DIB-R criteria for BPD; history of repetitive deliberate self-harm with at least one episode during month before enrollment<br>Exclusions: Comorbid psychotic disorders, bipolar I disorder, or SUD; elevated suicide risk (scoring $\geq 9$ on BHS); describing concrete immediate suicide plan | Mean age, <i>years</i> ( <i>SD</i> ):<br>G1: 26 (7.7)<br>G2: 30 (8.6)<br>Female: 100%<br>Race/ethnicity:<br>White: 93%<br>Nonwhite: 7% | Primary outcome: NR<br>G2 significantly more effective than G1 in reducing frequency (1.98 vs. 6.69, $P < 0.001$ ) and severity (0.51 vs. 1.01, $P < 0.001$ ) of deliberate self-harm 6 months posttreatment<br>Attrition: 0% (0/30)<br>G1: 0% (0/15)<br>G2: 0% (0/15) | Moderate     |

BHS=Beck Hopelessness Scale; BPD=borderline personality disorder; DIB-R=Diagnostic Interview for Borderlines-Revised; DSM-IV=*Diagnostic and Statistical Manual of Mental Disorders*, 4th Edition; G1=Group 1; G2=Group 2; MACT>manual-assisted cognitive therapy; *N*=sample size; NR=not reported; RCT=randomized controlled trial; SD=standard deviation; SUD=substance use disorder; TAU=treatment as usual.

## Cognitive-Behavioral Therapy vs. Treatment as Usual

**TABLE D-6. Study characteristics and main results of CBT compared with TAU**

| Author (year) and/or trial name | Study characteristics                                                                                    | Participants, <i>N</i> ; interventions; duration                                                                                                                                                                                                                                          | Study population, including main inclusion and exclusion criteria                                                                                                                                                                                                                                                                                                                                                                                                       | Sample demographics                                                                                                                | Primary outcome; main results; attrition                                                                                                                                                                                                                                                                                                                                                                                                                                                                                                                  | Risk of bias |
|---------------------------------|----------------------------------------------------------------------------------------------------------|-------------------------------------------------------------------------------------------------------------------------------------------------------------------------------------------------------------------------------------------------------------------------------------------|-------------------------------------------------------------------------------------------------------------------------------------------------------------------------------------------------------------------------------------------------------------------------------------------------------------------------------------------------------------------------------------------------------------------------------------------------------------------------|------------------------------------------------------------------------------------------------------------------------------------|-----------------------------------------------------------------------------------------------------------------------------------------------------------------------------------------------------------------------------------------------------------------------------------------------------------------------------------------------------------------------------------------------------------------------------------------------------------------------------------------------------------------------------------------------------------|--------------|
| Davidson et al. (2006); BOSCOT  | Design: RCT<br>Setting: Outpatient, multicenter<br>Country: United Kingdom<br>Funding: Other, foundation | <i>N</i> =106<br>G1 (52): TAU; inpatient and outpatient hospital services, community-based services, and primary and community care services<br>G2 (54): CBT; up to 30 sessions over 1 year (1 hour/session) with weekly supervision from CBT experts at each site<br>Duration: 24 months | Inclusion: Age 18–65 years; met criteria for at least five BPD items using DSM-IV Axis II Personality Disorders; received either inpatient psychiatric services or assessment at accident and emergency services<br>Exclusion: Currently receiving in-patient treatment for a mental state disorder or systematic psychological therapy or specialist service; evidence of organic illness, mental impairment, substance dependence, schizophrenia, or bipolar disorder | Mean age, <i>years</i> ( <i>SD</i> ):<br>32 (9.1)<br>G1: 31 (9.4)<br>G2: 32 (9.0)<br>Female: 84%<br>Race/ethnicity:<br>White: 100% | Primary outcome: Suicidal acts, psychiatric hospitalization, accident, and emergency attendance at 24 months<br>G2 significantly lower number of suicidal acts per person (0.87 vs. 1.73, <i>P</i> =0.02) and greater improvements on STAI (5.4 vs. 0.5, <i>P</i> =0.01) than G1 after 24 months<br>No significant differences in suicidal acts; on STAI, BDI-II, EQ-5D, or SFQ; or in number of hospitalizations after 12 months<br>Incidence of AEs: NR<br>Withdrawal due to AEs: NR<br>Attrition: 15%<br>Differential attrition: ≤10 percentage points | Moderate     |

AE=adverse event; BDI-II=Beck Depression Inventory; BOSCOT=Borderline Personality Disorder Study of Cognitive Therapy; BPD=borderline personality disorder; CBT=cognitive-behavioral therapy; DSM-IV=*Diagnostic and Statistical Manual of Mental Disorders*, 4th Edition; EQ-5D=European Quality of Life-5 Dimension; G1=Group 1; G2=Group 2; *N*=sample size; NR=not reported; RCT=randomized controlled trial; SD=standard deviation; SFQ=Social Functioning Questionnaire; STAI=State-Trait Anxiety Inventory; TAU=treatment as usual.

## Dialectical Behavior Therapy vs. Wait-List/Treatment as Usual

**TABLE D-7. Study characteristics and main results of DBT compared with WL or TAU**

| Author (year) and/or trial name | Study characteristics                                                                                                                  | Participants, <i>N</i> ; interventions; duration                                                                                                                                                                                                                                                                                                                        | Study population, including main inclusion and exclusion criteria                                                                                                                                                                                                                                                                    | Sample demographics                                                                                         | Primary outcome; main results; attrition                                                                                                                                                                                                                                                                                                                                                                                                                                   | Risk of bias |
|---------------------------------|----------------------------------------------------------------------------------------------------------------------------------------|-------------------------------------------------------------------------------------------------------------------------------------------------------------------------------------------------------------------------------------------------------------------------------------------------------------------------------------------------------------------------|--------------------------------------------------------------------------------------------------------------------------------------------------------------------------------------------------------------------------------------------------------------------------------------------------------------------------------------|-------------------------------------------------------------------------------------------------------------|----------------------------------------------------------------------------------------------------------------------------------------------------------------------------------------------------------------------------------------------------------------------------------------------------------------------------------------------------------------------------------------------------------------------------------------------------------------------------|--------------|
| Bohus et al. (2004)             | Design: Nonrandomized clinical trial<br>Setting: Inpatient, single center<br>Country: Germany<br>Funding: Government, DFG other, BPDRF | <i>N</i> =60<br>G1 (20): WL (TAU)<br>G2 (40): DBT; individual therapy (2 hours/week), group skills training (2 hours/week), group psychoeducation (1 hour/week), peer group meetings (2 hours/week), mindfulness group (1 hour/week), individual body-oriented therapy (1.5 hours/week), and therapist team consultations meetings (2 hours/week)<br>Duration: 3 months | Inclusion: Met DSM-IV criteria for BPD using SCID-II and DIB-R; one suicide attempt or minimum of two NSSI acts within the past 2 years<br>Exclusion: Comorbid schizophrenia, bipolar I disorder, substance abuse, or intellectual disability; living >250 miles from inpatient center; ongoing outpatient DBT or DBT post-discharge | Mean age, <i>years</i> ( <i>SD</i> ):<br>G1: 30 (5.4)<br>G2: 29 (7.2)<br>Female: 100%<br>Race/ethnicity: NR | Primary outcome: NR<br>G2 significantly more effective than G1 on GSI (0.56 vs. 0.07, $P=0.005$ ), GAF (11.4 vs. 1.3, $P=0.003$ ), BDI (NR vs. 10.4, $P=0.002$ ), STAI (-8.2 vs. +1.2, $P<0.001$ ), and Ham-A (0.6 vs. NR, $P=0.01$ ) and on self-mutilation (62% vs. 31%, $P=0.039$ )<br>No significant differences on DES and STAXI<br>Incidence of AEs: NR<br>Withdrawal due to AEs: NR<br>Attrition: 17%<br>Differential attrition:<br>G1: 5% (1/20)<br>G2: 22% (9/40) | High         |



**TABLE D-7. Study characteristics and main results of DBT compared with WL or TAU (continued)**

| Author (year) and/or trial name | Study characteristics                                                                                             | Participants, <i>N</i> ; interventions; duration                                                                                                                                                                                                                                                                                                                   | Study population, including main inclusion and exclusion criteria                                                                                                                                                                                                                                                                                               | Sample demographics                                                                                                                                            | Primary outcome; main results; attrition                                                                                                                                                                                                                                                                                                                         | Risk of bias |
|---------------------------------|-------------------------------------------------------------------------------------------------------------------|--------------------------------------------------------------------------------------------------------------------------------------------------------------------------------------------------------------------------------------------------------------------------------------------------------------------------------------------------------------------|-----------------------------------------------------------------------------------------------------------------------------------------------------------------------------------------------------------------------------------------------------------------------------------------------------------------------------------------------------------------|----------------------------------------------------------------------------------------------------------------------------------------------------------------|------------------------------------------------------------------------------------------------------------------------------------------------------------------------------------------------------------------------------------------------------------------------------------------------------------------------------------------------------------------|--------------|
| Carter et al. (2010)            | Design: RCT<br>Setting: Outpatient, single center<br>Country: Australia<br>Funding: NR                            | <i>N</i> =76<br>G1 (35): 6 months WL while receiving TAU<br>G2 (38): DBT; team-based approach including individual therapy, weekly group-based skills training, and telephone access to an individual therapist and therapist supervision groups<br>Duration: 12 months                                                                                            | Inclusion: Females; ages 18–65 years; met DSM-IV criteria for BPD; history of multiple episodes of deliberate self-harm with at least three self-reported episodes in preceding 12 months<br>Exclusion: Presence of disabling organic condition, schizophrenia, bipolar disorder, psychotic depression, florid antisocial behavior, or developmental disability | Mean age, <i>years</i> ( <i>SD</i> ): 25 (6.1)<br>Female: 100%<br>Race/ethnicity: NR<br>Sample demographics and outcome results reported among subset analyzed | Primary outcome: Deliberate self-harm and hospitalizations because of self-harm at 6 months<br>No significant differences on number of self-harm episodes, proportion of participants with self-harm, or hospitalizations<br>Incidence of AEs: NR<br>Withdrawal due to AEs: NR<br>Attrition: 30%<br>Differential attrition:<br>G1: 11% (4/35)<br>G2: 47% (18/38) | Low          |
| Feigenbaum et al. (2012)        | Design: RCT<br>Setting: Outpatient, single center<br>Country: United Kingdom<br>Funding: Government, C&IHA, NTRHA | <i>N</i> =42<br>G1 (16): TAU; standard care of a range of individualized service provisions according to patients' needs through local crisis services<br>G2 (26): DBT; goal setting and commitment building (3–6 weeks), individual therapy (1 hour/week), group skills training (2.5 hours/week), and out-of-hours telephone consultation<br>Duration: 12 months | Inclusion: Males and females; ages 18–65 years; DSM-IV criteria for Cluster B personality disorder<br>Exclusion: Forensic history with evidence of current high and immediate risk to others; in long-term psychotherapeutic treatment for schizophrenia or bipolar disorder; substance abuse; severe cognitive impairment                                      | Mean age, <i>years</i> ( <i>SD</i> ):<br>G1: 35 (7.4)<br>G2: 35 (7.8)<br>Female: 73%<br>Race/ethnicity: NR                                                     | Primary outcome: CORE-OM at 12 months<br>No significant differences on CORE-OM, DSH, DES, BDI, STAXI, and OAS-M<br>Incidence of AEs: NR<br>Withdrawal due to AEs: NR<br>Attrition: 29%<br>Differential attrition:<br>G1: 13% (2/16)<br>G2: 39% (10/26)                                                                                                           | High         |

**TABLE D-7. Study characteristics and main results of DBT compared with WL or TAU (continued)**

| Author (year) and/or trial name          | Study characteristics                                                                                          | Participants, <i>N</i> ; interventions; duration                                                                                                                                                                                  | Study population, including main inclusion and exclusion criteria                                                                    | Sample demographics                                                                                                                       | Primary outcome; main results; attrition                                                                                                                                                                                                                                                                                                                                       | Risk of bias |
|------------------------------------------|----------------------------------------------------------------------------------------------------------------|-----------------------------------------------------------------------------------------------------------------------------------------------------------------------------------------------------------------------------------|--------------------------------------------------------------------------------------------------------------------------------------|-------------------------------------------------------------------------------------------------------------------------------------------|--------------------------------------------------------------------------------------------------------------------------------------------------------------------------------------------------------------------------------------------------------------------------------------------------------------------------------------------------------------------------------|--------------|
| Gregory and Sachdeva (2016) <sup>a</sup> | Design: Retrospective cohort<br>Setting: Outpatient, single center<br>Country: United States<br>Funding: APsaA | <i>N</i> =41<br>G1 (16): TAU; unstructured psychotherapy<br>G2 (25): DBT; skill group sessions including learning mindfulness, emotion regulation, and distress tolerance, followed by individual sessions<br>Duration: 12 months | Inclusion: Age >18 years; SCID-II; Individual Assessment Profile<br>Exclusion: Schizophrenia, intellectual disabilities, or dementia | Mean age, <i>years</i> ( <i>SD</i> ):<br>G1: 29 (11.5)<br>G2: 37 (10.2)<br>Female: 81%<br>Race/ethnicity:<br>Caucasian: 88%<br>Other: 12% | Primary outcome: BEST at 12 months<br>G2 significantly more effective than G1 on BDI (-5.5 vs. -0.6, <i>P</i> <0.001)<br>No significant differences on BEST and SDS, or in number of suicide attempts and self-injuries<br>Incidence of AEs: NR<br>Withdrawal due to AEs:<br>G1: 0% (0/16)<br>G2: 0% (0/25)<br>Attrition: 53%<br>Differential attrition: <10 percentage points | High         |

**TABLE D-7. Study characteristics and main results of DBT compared with WL or TAU (continued)**

| Author (year) and/or trial name | Study characteristics                                                                                             | Participants, <i>N</i> ; interventions; duration                                                           | Study population, including main inclusion and exclusion criteria                                                                                                                                                                                                                                                                                 | Sample demographics                                                                 | Primary outcome; main results; attrition                                                                                                                                                                                                                                                                                                                                                                                                                                                                                                                                                                                   | Risk of bias |
|---------------------------------|-------------------------------------------------------------------------------------------------------------------|------------------------------------------------------------------------------------------------------------|---------------------------------------------------------------------------------------------------------------------------------------------------------------------------------------------------------------------------------------------------------------------------------------------------------------------------------------------------|-------------------------------------------------------------------------------------|----------------------------------------------------------------------------------------------------------------------------------------------------------------------------------------------------------------------------------------------------------------------------------------------------------------------------------------------------------------------------------------------------------------------------------------------------------------------------------------------------------------------------------------------------------------------------------------------------------------------------|--------------|
| McMain et al. (2017)            | Design: RCT<br>Setting: Outpatient, single center<br>Country: Canada<br>Funding: Ontario Mental Health Foundation | <i>N</i> =84<br>G1 (42): WL<br>G2 (42): Brief DBT; skills training only<br>20 weeks<br>Follow up: 32 weeks | Inclusion: Ages 18–60 years; met DSM-IV criteria for BPD; two suicidal and/or NSSI episodes in past 5 years, with one occurring within 10 weeks prior to enrollment<br>Exclusion: Met DSM-IV criteria for psychotic disorder, bipolar I disorder, or dementia; evidence of intellectual disability; participation in DBT program within past year | Mean age, <i>years</i> ( <i>SD</i> ): 30 (8.6)<br>Female: 79%<br>Race/ethnicity: NR | Primary outcome: Frequency of suicidal or NSSI episodes at 32 weeks<br>G2 significantly more effective than G1 to reduce suicidal and self-injurious episodes on LSASI (7.65 vs. 5.77, <i>P</i> =0.04) and to improve symptoms on STAXI (8.44 vs. 4.79, <i>P</i> <0.001) and DERS (20.80 vs. 4.74, <i>P</i> <0.01)<br>G2 significantly more clinically relevant improvements on SCL-90-R than G1 (43.8% vs. 18.4%, <i>P</i> =0.024)<br>No significant differences on DSHI, BSL-23, BDI, and BIS-11<br>Incidence of AEs: NR<br>Withdrawal due to AEs: NR<br>Attrition: 16%<br>Differential attrition: <10 percentage points | Moderate     |

**TABLE D-7. Study characteristics and main results of DBT compared with WL or TAU (continued)**

| Author (year) and/or trial name                    | Study characteristics                                                                                                            | Participants, N; interventions; duration                                                                                                                                                                                                                                                                                                                                            | Study population, including main inclusion and exclusion criteria                                                                                                                                                                                                                                                                       | Sample demographics                                                  | Primary outcome; main results; attrition                                                                                                                                                                                                                                   | Risk of bias |
|----------------------------------------------------|----------------------------------------------------------------------------------------------------------------------------------|-------------------------------------------------------------------------------------------------------------------------------------------------------------------------------------------------------------------------------------------------------------------------------------------------------------------------------------------------------------------------------------|-----------------------------------------------------------------------------------------------------------------------------------------------------------------------------------------------------------------------------------------------------------------------------------------------------------------------------------------|----------------------------------------------------------------------|----------------------------------------------------------------------------------------------------------------------------------------------------------------------------------------------------------------------------------------------------------------------------|--------------|
| Verheul et al. (2003); van den Bosch et al. (2005) | Design: RCT<br>Setting: Outpatient, with various settings<br>Country: The Netherlands<br>Funding: Dutch health insurance company | N=64<br>G1 (33): TAU; clinical management from original referral source; generally no more than two sessions per month with a psychologist, psychiatrist, or social worker<br>G2 (31): Weekly DBT; individual CBT sessions with the primary therapist, skills-training groups (2–2.5 hours/session), and supervision and consultation meetings for therapists<br>Duration: 52 weeks | Inclusions: Female; ages 18–70 years; BPD; residing near Amsterdam; referred by psychologist or psychiatrist willing to sign agreement committing to deliver 12 months of TAU<br>Exclusions: DSM-IV diagnosis of bipolar disorder or (chronic) psychotic disorder; insufficient command of Dutch language; severe cognitive impairments | Mean age, years (SD): 35 (7.7)<br>Female: 100%<br>Race/ethnicity: NR | Primary outcome: NR<br>G2 more effective than G1 to reduce self-mutilating behavior (35% vs. 57%, $P=0.003$ ); numerically lower frequency of suicidal attempts (7% vs. 26%, $P=0.06$ ) for G2 than G1<br>Incidence of AEs: NR<br>Withdrawal due AEs: NR<br>Attrition: 19% | Moderate     |

AE=adverse event; APsaA=American Psychoanalytic Association; BDI: Beck Depression Inventory; BEST=Borderline Evaluation of Severity Over Time; BIS-11=Barrett Impulsiveness Scale-11; BPD=borderline personality disorder; BPDRF=Borderline Personality Disorder Research Foundation; BSL-23=Borderline Symptom List-23; C&IHA=Camden and Islington Health Authority; CBT=cognitive-behavioral therapy; CORE-OM=Clinical Outcomes in Routine Evaluation–Outcome Measure; DBT=dialectical behavior therapy; DERS=Difficulties in Emotion Regulation Scale; DES=Dissociations Experiences Scale; DFG=German Research Foundation; DIB-R=Diagnostic Interview for Borderlines-Revised; DSH=deliberate self-harm; DSHI=Deliberate Self-Harm Inventory; DSM-IV=*Diagnostic and Statistical Manual of Mental Disorders*, 4th Edition; G1=Group 1; G2=Group 2; GAF=Global Assessment of Functioning; GSI=Global Severity Index; Ham-A=Hamilton Rating Scale for Anxiety; LSASI=Lifetime Suicide Attempt Self-Injury Interview; N=sample size; NR=not reported; NSSI=nonsuicidal self-injury; NTRHA=North Thames Regional Health Authority; OAS-M=Overt Aggression Scale-Modified; RCT=randomized controlled trial; SCID-II=Structured Clinical Interview for DSM-IV Axis II Disorders; SCL-90-R=Symptom Checklist-90-Revised; SD=standard deviation; SDS=Sheehan Disability Scale; STAI=State-Trait Anxiety Inventory; STAXI=State-Trait Anger Expression Inventor; TAU=treatment as usual; WL=wait-list.

<sup>a</sup>Gregory and Sachdeva (2016) is a three-arm trial. The two relevant arms to DBT vs. TAU are reported in this table; other eligible comparisons are reported in Tables D-11 and D-20.

## Dialectical Behavior Therapy vs. Mentalization-Based Treatment

**TABLE D–8. Study characteristics and main results of DBT compared with MBT**

| Author (year) and/or trial name | Study characteristics                                                                                                           | Participants, <i>N</i> ; interventions; duration                    | Study population, including main inclusion and exclusion criteria                                                                                                                                                     | Sample demographics                                                                                                 | Primary outcome; main results; attrition                                                                                                                                                                                                                             | Risk of bias |
|---------------------------------|---------------------------------------------------------------------------------------------------------------------------------|---------------------------------------------------------------------|-----------------------------------------------------------------------------------------------------------------------------------------------------------------------------------------------------------------------|---------------------------------------------------------------------------------------------------------------------|----------------------------------------------------------------------------------------------------------------------------------------------------------------------------------------------------------------------------------------------------------------------|--------------|
| Barnicot and Crawford (2019)    | Design: Nonrandomized clinical trial<br>Setting: Outpatient, multicenter<br>Country: United Kingdom<br>Funding: Government, NIH | <i>N</i> =90<br>G1 (58): DBT<br>G2 (32): MBT<br>Duration: 12 months | Inclusion: Met DSM-IV criteria for BPD; was about to begin either outpatient DBT or MBT<br>Exclusion: Intellectual disability; difficulty communicating in English; insufficient capacity to provide informed consent | Mean age, years ( <i>SD</i> ): 31 (13.0)<br>Female: 72%<br>Race/ethnicity:<br>White: 64%<br>Black and minority: 36% | Primary outcome: NR<br>No significant differences between G1 and G2 on BEST, DERS, and DES and in number of self-harm incidents at 12 months<br>Incidence of AEs: NR<br>Withdrawal due to AEs: NR<br>Attrition: 13%<br>Differential attrition: <10 percentage points | High         |

AE=adverse event; BEST=Borderline Evaluation of Severity Over Time; BPD=borderline personality disorder; DBT=dialectical behavior therapy; DERS=Difficulties in Emotion Regulation Scale; DES=Dissociative Experiences Scale; DSM-IV=*Diagnostic and Statistical Manual of Mental Disorders*, 4th Edition; G1=Group 1; G2=Group 2; MBT=mentalization-based therapy; *N*=sample size; NIH=National Institutes of Health; NR=not reported; SD=standard deviation.

## Dialectical Behavior Therapy vs. General Psychiatric Management

**TABLE D-9. Study characteristics and main results of DBT compared with GPM for BPD**

| Author (year) and/or trial name | Study characteristics                                                                             | Participants, <i>N</i> ; interventions; duration                                                                                                                                                                                                            | Study population, including main inclusion and exclusion criteria                                                                                                                                                                                                                                                                                                                                                                                                    | Sample demographics                                                                 | Primary outcome; main results; attrition                                                                                                                                                                                                                                                                                                                                                                                                                                                                   | Risk of bias |
|---------------------------------|---------------------------------------------------------------------------------------------------|-------------------------------------------------------------------------------------------------------------------------------------------------------------------------------------------------------------------------------------------------------------|----------------------------------------------------------------------------------------------------------------------------------------------------------------------------------------------------------------------------------------------------------------------------------------------------------------------------------------------------------------------------------------------------------------------------------------------------------------------|-------------------------------------------------------------------------------------|------------------------------------------------------------------------------------------------------------------------------------------------------------------------------------------------------------------------------------------------------------------------------------------------------------------------------------------------------------------------------------------------------------------------------------------------------------------------------------------------------------|--------------|
| McMain et al. (2009)            | Design: RCT<br>Setting: Both in-patient and out-patient<br>Country: Canada<br>Funding: Government | <i>N</i> =180<br>G1(90): Weekly individual therapy and medication management<br>G2 (90): DBT; weekly individual therapy, skills group sessions, and phone coaching with explicit focus on self-harm and suicidal behavior<br>1 year<br>Follow up: 36 months | Inclusion: Met DSM-IV criteria for BPD; ages 18–60 years; Two or more episodes of suicidal or NSSI episodes in past 5 years, at least one of which occurred in 3 months preceding enrollment<br>Exclusion: DSM-IV psychotic disorder, bipolar I disorder, delirium, dementia, or SUD in preceding 30 days; medical condition that precluded psychiatric medications; any serious medical condition likely to require hospitalization within next year (e.g., cancer) | Mean age, <i>years</i> ( <i>SD</i> ): 30 (9.9)<br>Female: 86%<br>Race/ethnicity: NR | Primary outcome: Suicidal episodes, NSSI at 12 months<br>No significant differences between G1 and G2 for number of suicidal events and NSSI, or on SCL-90-R, ZAN-BPD, BDI, and IIP after 12 months<br>G1 significantly greater improvements on BDI (17.4 vs. 12.7, <i>P</i> =0.004) than G2 at 36-month follow-up; no significant differences at 36 months for any other outcomes<br>Incidence of AEs: NR<br>Withdrawal due to AEs: NR<br>Attrition: 38%<br>Differential attrition: <10 percentage points | High         |

AE=adverse event; BDI=Beck Depression Inventory; BPD=borderline personality disorder; DBT=dialectical behavior therapy; DSM-IV=*Diagnostic and Statistical Manual of Mental Disorders*, 4th Edition; G1=Group 1; G2=Group 2; GPM=general psychiatric management; IIP=Inventory of Interpersonal Problems; *N*=sample size; NR=not reported; NSSI=nonsuicidal self-injury; RCT=randomized controlled trial; SCL-90-R=Symptom Checklist-90-Revised; SD=standard deviation; SUD=substance use disorder; ZAN-BPD=Zanarini Rating Scale for Borderline Personality Disorder.

## Dialectical Behavior Therapy vs. Systems Training for Emotional Predictability and Problem-Solving Behavior Therapy

**TABLE D-10. Study characteristics and main results of DBT compared with STEPPS behavior therapy**

| Author (year) and/or trial name | Study characteristics                                                                                     | Participants, <i>N</i> ; interventions; duration                                                                                                      | Study population, including main inclusion and exclusion criteria                                                                  | Sample demographics                                                                                 | Primary outcome; main results; attrition                                                                                                                                                                                                                                                                                     | Risk of bias |
|---------------------------------|-----------------------------------------------------------------------------------------------------------|-------------------------------------------------------------------------------------------------------------------------------------------------------|------------------------------------------------------------------------------------------------------------------------------------|-----------------------------------------------------------------------------------------------------|------------------------------------------------------------------------------------------------------------------------------------------------------------------------------------------------------------------------------------------------------------------------------------------------------------------------------|--------------|
| Guillén Botella et al. (2021)   | Design: Nonrandomized clinical trial<br>Setting: Outpatient, multicenter<br>Country: Spain<br>Funding: NR | <i>N</i> =72<br>G1 (45): Weekly individual and group DBT<br>G2 (27): Weekly STEPPS group therapy plus weekly individual therapy<br>Duration: 6 months | Inclusion: Met DSM-5 criteria for BPD<br>Exclusion: Moderate or severe intellectual disability, schizophrenia, or bipolar disorder | Mean age, <i>years</i> ( <i>SD</i> ): 32 (8.8)<br>Female: 94%<br>Race/ethnicity:<br>Caucasian: 100% | Primary outcome: BSL-23 at 6 months<br>G1 significantly more effective than G2 on sum of BSL-23 (23.56 vs. 29.29, <i>P</i> =0.03) after 6 months<br>No significant differences for any other measure<br>Incidence of AEs: NR<br>Withdrawal due to AEs: NR<br>Attrition: 32%<br>Differential attrition: <10 percentage points | High         |

AE=adverse event; BPD=borderline personality disorder; BSL-23=Borderline Symptom List-23; DBT=dialectical behavior therapy; DSM-5=*Diagnostic and Statistical Manual of Mental Disorders*, 5th Edition; G1=Group 1; G2=Group 2; *N*=sample size; NR=not reported; SD=standard deviation; STEPPS=systems training for emotional predictability and problem-solving.

## Dialectical Behavior Therapy vs. Dynamic Deconstructive Psychotherapy

**TABLE D-11. Study characteristics and main results of DBT compared with DDP**

| Author (year) and/or trial name                                   | Study characteristics                                                                                          | Participants, <i>N</i> ; interventions; duration                                                                                                                                                                                                                                                     | Study population, including main inclusion and exclusion criteria                                                                              | Sample demographics                                                                                                                       | Primary outcome; main results; attrition                                                                                                                                                                                                                                                                                                                                                                                                                                                           | Risk of bias |
|-------------------------------------------------------------------|----------------------------------------------------------------------------------------------------------------|------------------------------------------------------------------------------------------------------------------------------------------------------------------------------------------------------------------------------------------------------------------------------------------------------|------------------------------------------------------------------------------------------------------------------------------------------------|-------------------------------------------------------------------------------------------------------------------------------------------|----------------------------------------------------------------------------------------------------------------------------------------------------------------------------------------------------------------------------------------------------------------------------------------------------------------------------------------------------------------------------------------------------------------------------------------------------------------------------------------------------|--------------|
| Gregory and Sachdeva (2016) <sup>a</sup> ; Sachdeva et al. (2013) | Design: Retrospective cohort<br>Setting: Outpatient, single center<br>Country: United States<br>Funding: APsaA | <i>N</i> =52<br>G1 (25): DBT; weekly 1-hour individual and 2-hour group sessions and telephone skills coaching<br>G2 (27): DDP; combined elements of translational neuroscience, object relations theory, and deconstructionist philosophy; weekly 1-hour individual sessions<br>Duration: 12 months | Inclusion: Age >18 years; BPD by SCID-II and Individual Assessment Profile<br>Exclusion: Schizophrenia, intellectual disabilities, or dementia | Mean age, <i>years</i> ( <i>SD</i> ):<br>G1: 29 (11.5)<br>G2: 37 (10.2)<br>Female: 81%<br>Race/ethnicity:<br>Caucasian: 88%<br>Other: 12% | Primary outcome: BEST scores at 12 months<br>G2 significantly greater improvement than G1 on severity (BEST: 33.0 vs. 41.8, <i>P</i> =0.04), self-injuries (SBQ: 1.3 vs. 2.4, <i>P</i> =0.02), depression (BDI: 17.1 vs. 27.6, <i>P</i> =0.009), and disability (SDS: 3.8 vs. 6.1, <i>P</i> =0.049)<br>No differences between G1 and G2 in suicide attempts<br>Incidence of AEs: NR<br>Withdrawal due to AEs: NR<br>Attrition: 53%<br>Differential attrition:<br>G1: 64% (16/25)<br>G2: 33% (9/27) | High         |

AE=adverse event; APsaA=American Psychoanalytic Association; BDI=Beck Depression Inventory; BEST=Borderline Evaluation of Severity Over Time; BPD=borderline personality disorder; DBT=dialectical behavior therapy; DDP=dynamic deconstructive psychotherapy; G1=Group 1; G2=Group 2; *N*=sample size; NR=not reported; RCT=randomized controlled trial; SBQ=Suicidal Behaviors Questionnaire; SCID-II=Structured Clinical Interview for DSM-IV Axis II Personality Disorders; SD=standard deviation; SDS=Sheehan Disability Scale.

<sup>a</sup>Gregory and Sachdeva (2016) is a three-arm trial. The two relevant arms to DBT vs. DDT are reported in this table; other eligible comparisons are reported in Tables D-7 and D-20.



## Dialectical Behavior Therapy vs. Transference-Focused Psychotherapy vs. Supportive Therapy

**TABLE D-12. Study characteristics and main results of DBT compared with TFP and supportive therapy**

| Author (year) and/or trial name | Study characteristics                                                                                   | Participants, <i>N</i> ; interventions; duration                                                                                                                                                                                  | Study population, including main inclusion and exclusion criteria                                                                                                                                                   | Sample demographics                                                                                                                                    | Primary outcome; main results; attrition                                                                                                                                                                                                                                                                             | Risk of bias |
|---------------------------------|---------------------------------------------------------------------------------------------------------|-----------------------------------------------------------------------------------------------------------------------------------------------------------------------------------------------------------------------------------|---------------------------------------------------------------------------------------------------------------------------------------------------------------------------------------------------------------------|--------------------------------------------------------------------------------------------------------------------------------------------------------|----------------------------------------------------------------------------------------------------------------------------------------------------------------------------------------------------------------------------------------------------------------------------------------------------------------------|--------------|
| Clarkin et al. (2007)           | Design: RCT<br>Setting: Outpatient, multicenter<br>Country: United States<br>Funding: Other, foundation | <i>N</i> =90<br>G1 (22): Weekly supportive treatment sessions<br>G2 (23): TFP; twice weekly individual sessions<br>G3 (17): DBT; weekly individual and group sessions and available telephone consultation<br>Duration: 12 months | Inclusion: Ages 18–50 years; met DSM-IV criteria for BPD<br>Exclusion: Comorbid psychotic disorders, bipolar I disorder, delusional disorder, delirium, dementia, and/or amnesic, other cognitive disorders, or SUD | Mean age, <i>years</i> ( <i>SD</i> ): 31 (7.9)<br>Female: 92%<br>Race/ethnicity:<br>White: 68%<br>Black: 10%<br>Hispanic: 9%<br>Asian: 6%<br>Other: 8% | Primary outcome: Suicidal behavior at 12 months<br>No significant differences among G1, G2, and G3 in suicidal behavior or on BDI, BSI, or GAF at 12 months<br>Incidence of AEs: NR<br>Withdrawal due to AEs: NR<br>Attrition: 31%<br>Differential attrition:<br>G1: 27% (8/30)<br>G2: 23% (7/30)<br>G3: 43% (13/30) | High         |

AE=adverse event; BDI=Beck Depression Inventory; BPD=borderline personality disorder; BSI=Brief Symptom Inventory; DBT=dialectical behavior therapy; DSM-IV=*Diagnostic and Statistical Manual of Mental Disorders*, 4th Edition; G1=Group 1; G2=Group 2; G3=Group 3; GAF=Global Assessment of Functioning; *N*=sample size; NR=not reported; RCT=randomized controlled trial; SD=standard deviation; SUD=substance use disorder; TFP=transference-focused psychotherapy.

## Components of Dialectical Behavior Therapy vs. Other Components of Dialectical Behavior Therapy

**TABLE D-13. Study characteristics and main results of components of DBT compared with other components of DBT for BPD**

| Author (year) and/or trial name | Study characteristics                                                                                                                            | Participants, <i>N</i> ; interventions; duration                                                                                                                                     | Study population, including main inclusion and exclusion criteria                                                                                                                                                                                                    | Sample demographics                                                                  | Primary outcome; main results; attrition                                                                                                                                                                                                                | Risk of bias |
|---------------------------------|--------------------------------------------------------------------------------------------------------------------------------------------------|--------------------------------------------------------------------------------------------------------------------------------------------------------------------------------------|----------------------------------------------------------------------------------------------------------------------------------------------------------------------------------------------------------------------------------------------------------------------|--------------------------------------------------------------------------------------|---------------------------------------------------------------------------------------------------------------------------------------------------------------------------------------------------------------------------------------------------------|--------------|
| Andión et al. (2012)            | Design: Nonrandomized clinical trial<br>Setting: Outpatient, single center<br>Country: Spain<br>Funding: Government, health department, La Caixa | <i>N</i> =51<br>G1 (37): Weekly individual DBT therapy<br>G2 (14): Combined weekly individual and group DBT sessions<br>Duration: 12 months intervention, followed through 18 months | Inclusion: Ages 18–50 years; one or more suicide attempts and/or self-harm behaviors during previous month; met criteria for DSM-IV Axis II and Axis I Disorders<br>Exclusion: Intellectual disability, schizophrenia, or bipolar I disorder; previous DBT treatment | Mean age, <i>years</i> ( <i>SD</i> ): 26 (6.5)<br>Female: 100%<br>Race/ethnicity: NR | Primary outcome: Suicide attempts and self-harm at 12 and 18 months<br>No significant differences between groups on any outcome<br>Incidence of AEs: NR<br>Withdrawal due to AEs: NR<br>Attrition: 10%<br>Differential attrition: <10 percentage points | High         |

**TABLE D-13. Study characteristics and main results of components of DBT compared with other components of DBT for BPD (continued)**

| Author (year) and/or trial name | Study characteristics                                                                                  | Participants, <i>N</i> ; interventions; duration                                                                                                                                                                                                                                                                                         | Study population, including main inclusion and exclusion criteria                                                                                                                                                                                                                                                                                                                                                                                            | Sample demographics                                                                                                                                 | Primary outcome; main results; attrition                                                                                                                                                                                                                                                                                                                                                                                                                                                                                                                           | Risk of bias |
|---------------------------------|--------------------------------------------------------------------------------------------------------|------------------------------------------------------------------------------------------------------------------------------------------------------------------------------------------------------------------------------------------------------------------------------------------------------------------------------------------|--------------------------------------------------------------------------------------------------------------------------------------------------------------------------------------------------------------------------------------------------------------------------------------------------------------------------------------------------------------------------------------------------------------------------------------------------------------|-----------------------------------------------------------------------------------------------------------------------------------------------------|--------------------------------------------------------------------------------------------------------------------------------------------------------------------------------------------------------------------------------------------------------------------------------------------------------------------------------------------------------------------------------------------------------------------------------------------------------------------------------------------------------------------------------------------------------------------|--------------|
| Linehan et al. (2015)           | Design: RCT<br>Setting: Outpatient, multicenter<br>Country: United States<br>Funding: Government, NIMH | <i>N</i> =99<br>G1 (33): Weekly standard DBT: skills training, individual therapy, telephone coaching, and a therapist consultation team<br>G2 (33): DBT individual therapy with no group skills training<br>G3 (33): Weekly DBT group skills training with no individual therapy<br>Duration: 1-year treatment followed through 2 years | Inclusion: Females; ages 18–60 years; met DSM-IV criteria for BPD; two or more suicide attempts and/or NSSI episodes in past 5 years, one or more suicide attempts or NSSI acts in 8 weeks prior to entering study, and one or more suicide attempts in past year<br>Exclusion: IQ <70; DSM-IV criteria for current psychotic or bipolar disorders; seizure disorder requiring medication; required primary treatment for another life-threatening condition | Mean age, <i>years</i> ( <i>SD</i> ): 30 (8.9)<br>Female: 100%<br>Race/ethnicity:<br>White: 71%<br>Asian American: 5%<br>Biracial: 22%<br>Other: 2% | Primary outcome: Frequency and severity of suicide attempts and NSSI episodes at 12 and 24 months<br>No significant difference between groups in suicide attempts, NSSI acts, or suicide ideation<br>During the treatment year, G1 and G3 significantly greater improvement in depression than G2 (12.3 and 10.4 vs. 18.2, <i>P</i> =0.02 on Ham-D) with no differences between groups in anxiety (Ham-A)<br>Incidence of AEs: NR<br>Withdrawal due to AEs: NR<br>Attrition: 26%<br>Differential attrition:<br>G1: 18% (6/33)<br>G2: 33% (11/33)<br>G3: 27% (9/33) | High         |

**TABLE D-13. Study characteristics and main results of components of DBT compared with other components of DBT for BPD (continued)**

| Author (year) and/or trial name | Study characteristics                                                                             | Participants, N; interventions; duration                                                                                                                                                                                    | Study population, including main inclusion and exclusion criteria                                                                                                                                                                                                                                                                                                    | Sample demographics                                                         | Primary outcome; main results; attrition                                                                                                                                                                                                                                                                                                                                                                                                                              | Risk of bias |
|---------------------------------|---------------------------------------------------------------------------------------------------|-----------------------------------------------------------------------------------------------------------------------------------------------------------------------------------------------------------------------------|----------------------------------------------------------------------------------------------------------------------------------------------------------------------------------------------------------------------------------------------------------------------------------------------------------------------------------------------------------------------|-----------------------------------------------------------------------------|-----------------------------------------------------------------------------------------------------------------------------------------------------------------------------------------------------------------------------------------------------------------------------------------------------------------------------------------------------------------------------------------------------------------------------------------------------------------------|--------------|
| Lyng et al. (2020)              | Design: Prospective cohort<br>Setting: Outpatient, multicenter<br>Country: Ireland<br>Funding: NR | N=88<br>G1 (54): Weekly standard DBT; individual therapy, group skills training, phone consultation (as needed), and therapist consultation team meeting<br>G2 (34): Weekly DBT group skills training<br>Duration: 6 months | Inclusion: DSM-IV-TR BPD or equivalent diagnosis of emotionally unstable personality disorder by community psychiatrist<br>Exclusion: Enduring psychotic disorder or primary (i.e., main reason for seeking treatment) alcohol or substance abuse disorder; suicide attempt in previous 6 months and/or ongoing medically serious self-harm; other weekly counseling | Mean age, years (SD): 33 (range 18–59)<br>Female: 83%<br>Race/ethnicity: NR | Primary outcome: Borderline symptoms, general psychopathology, suicidal ideation at 6 months<br>No significant differences between groups in BPD symptomatology, suicide ideation, and symptom severity index<br>G2 significantly greater improvement on BHS (8.0 vs. 11.91, $P=0.02$ ) and DERS (96.24 vs. 115.12, $P=0.02$ )<br>Incidence of AEs: NR<br>Withdrawal due to AEs: NR<br>Attrition: 25%<br>Differential attrition:<br>G1: 17% (9/54)<br>G2: 38% (13/34) | High         |

AE=adverse event; BHS=Beck Hopelessness Scale; BPD=borderline personality disorder; DBT=dialectical behavior therapy; DERS=Difficulties in Emotion Regulation Scale; DSM-IV=*Diagnostic and Statistical Manual of Mental Disorders*, 4th Edition; DSM-IV-TR=*Diagnostic and Statistical Manual of Mental Disorders*, 4th Edition, Text Revision; G1=Group 1; G2=Group 2; G3=Group 3; Ham-A=Hamilton Rating Scale for Anxiety; Ham-D=Hamilton Rating Scale for Depression; IQ=intelligence quotient; N=sample size; NIMH=National Institute of Mental Health; NR=not reported; NSSI=nonsuicidal self-injury; RCT=randomized controlled trial; SD=standard deviation.

## Component of Dialectical Behavior Therapy Skills Training vs. Another Component of Dialectical Behavior Therapy Skills Training

**TABLE D-14. Study characteristics and main results of component of DBT skills training compared with another component of DBT skills training for BPD**

| Author (year) and/or trial name | Study characteristics                                                                        | Participants, <i>N</i> ; interventions; duration                                                                                                                                                     | Study population, including main inclusion and exclusion criteria                                                                                                                                                                                                                                                                                                                           | Sample demographics                                                                                               | Primary outcome; main results; attrition                                                                                                                                                                                                                                                                                                                | Risk of bias |
|---------------------------------|----------------------------------------------------------------------------------------------|------------------------------------------------------------------------------------------------------------------------------------------------------------------------------------------------------|---------------------------------------------------------------------------------------------------------------------------------------------------------------------------------------------------------------------------------------------------------------------------------------------------------------------------------------------------------------------------------------------|-------------------------------------------------------------------------------------------------------------------|---------------------------------------------------------------------------------------------------------------------------------------------------------------------------------------------------------------------------------------------------------------------------------------------------------------------------------------------------------|--------------|
| Carmona i Farrés et al. (2019a) | Design: RCT<br>Setting: Outpatient, single center<br>Country: Spain<br>Funding: Other, mixed | <i>N</i> =70<br>G1 (35): Weekly group DBT interpersonal effectiveness skills training for 10 sessions<br>G2 (35): Weekly group DBT mindfulness skills training for 10 sessions<br>Duration: 10 weeks | Inclusion: Ages 18–50 years; DSM-IV BPD diagnosis; no comorbidities with schizophrenia, drug-induced psychosis, organic brain syndrome, SUD, bipolar disorder, intellectual disability, or MDE in course; no concurrent psychotherapy at study enrollment; no previous training in mindfulness, other meditation-contemplative practices, or any other mind-body practices<br>Exclusion: NR | Mean age, <i>years</i> ( <i>SD</i> ):<br>G1: 33.29 (8.54)<br>G2: 30.51 (6.9)<br>Female: 90%<br>Race/ethnicity: NR | Primary outcome: Emotional dysregulation (DERS) and impulsivity (BIS-11) at 10 weeks<br>No significant differences between G1 and G2 on DERS at 10 weeks<br>G2 significantly greater improvement on the BIS-11 (75.3 vs. 79.3, <i>P</i> =0.03) at 10 weeks<br>Incidence of AEs: NR<br>Withdrawal due to AEs: NR<br>Attrition: 28%<br>G1: 20%<br>G2: 37% | High         |

**TABLE D-14. Study characteristics and main results of component of DBT skills training compared with another component of DBT skills training for BPD (continued)**

| Author (year) and/or trial name | Study characteristics                                                                        | Participants, <i>N</i> ; interventions; duration                                                                                                                                                     | Study population, including main inclusion and exclusion criteria                                                                                                                                                                                                                                                                     | Sample demographics                                                                                                      | Primary outcome; main results; attrition                                                                                                                                                                                                                                                                                                                                                                         | Risk of bias |
|---------------------------------|----------------------------------------------------------------------------------------------|------------------------------------------------------------------------------------------------------------------------------------------------------------------------------------------------------|---------------------------------------------------------------------------------------------------------------------------------------------------------------------------------------------------------------------------------------------------------------------------------------------------------------------------------------|--------------------------------------------------------------------------------------------------------------------------|------------------------------------------------------------------------------------------------------------------------------------------------------------------------------------------------------------------------------------------------------------------------------------------------------------------------------------------------------------------------------------------------------------------|--------------|
| Carmona I Farrés et al. (2019b) | Design: RCT<br>Setting: Outpatient, single center<br>Country: Spain<br>Funding: Other, mixed | <i>N</i> =65<br>G1 (32): Weekly group DBT interpersonal effectiveness skills training for 10 sessions<br>G2 (33): Weekly group DBT mindfulness skills training for 10 sessions<br>Duration: 10 weeks | Inclusion: Ages 18–50 years; DSM-IV BPD diagnosis; no comorbidities with schizophrenia, drug-induced psychosis, organic brain syndrome, SUD, bipolar disorder, intellectual disability, or major depressive episode in course; no concurrent psychotherapy at study enrollment; right-handed; IQ within normal range<br>Exclusion: NR | Mean age, <i>years</i> ( <i>SD</i> ):<br>G1: 33.75 (8.78)<br>G2: 31.03 (6.76)<br>Female: 89.2%<br>Race/ethnicity: NR     | Primary outcome: DMN activation and deactivation during an executive task<br>No significant differences between G1 and G2 on BSL-23, BDI, STAI-T, or STAI-S at 10 weeks (decreases on outcome measures in both groups)<br>No between-group differences in DMN activation or deactivation<br>Incidence of AEs: NR<br>Withdrawal due to AEs: NR<br>Attrition: 23%<br>Differential attrition: ≤10 percentage points | High         |
| Elices et al. (2016)            | Design: RCT<br>Setting: Outpatient, single center<br>Country: Spain<br>Funding: Government   | <i>N</i> =64<br>G1 (32): Weekly group DBT interpersonal effectiveness skills training<br>G2 (32): Weekly group DBT mindfulness training<br>Duration: 10 weeks                                        | Inclusion: Ages 18–45 years; met BPD criteria according to SCID-II and DIB-R<br>Exclusion: Lifetime diagnosis of schizophrenia, drug-induced psychosis, organic brain syndrome, or bipolar disorder; participation in any psychotherapy during study or having previously received DBT; having meditation/yoga experience             | Mean age, <i>years</i> ( <i>SD</i> ):<br>32 (6.9)<br>G1: 32 (6.82)<br>G2: 32 (7.25)<br>Female: 86%<br>Race/ethnicity: NR | Primary outcome: Borderline severity at 10 weeks<br>G2 significantly reduced BPD symptoms on BSL-23 than G1 at 10 weeks (33.5 vs. 52.5, <i>P</i> =0.001)<br>Incidence of AEs: NR<br>Withdrawal due to AEs: NR<br>Attrition: 31%<br>Differential attrition:<br>G1: 22% (7/32)<br>G2: 41% (13/32)                                                                                                                  | High         |

**TABLE D-14. Study characteristics and main results of component of DBT skills training compared with another component of DBT skills training for BPD (continued)**

| Author (year) and/or trial name | Study characteristics                                                                        | Participants, <i>N</i> ; interventions; duration                                                                                                                                                      | Study population, including main inclusion and exclusion criteria                                                                                                                                                                                                                                                                                    | Sample demographics                                                                                        | Primary outcome; main results; attrition                                                                                                                                                                                                                                                                                                                          | Risk of bias |
|---------------------------------|----------------------------------------------------------------------------------------------|-------------------------------------------------------------------------------------------------------------------------------------------------------------------------------------------------------|------------------------------------------------------------------------------------------------------------------------------------------------------------------------------------------------------------------------------------------------------------------------------------------------------------------------------------------------------|------------------------------------------------------------------------------------------------------------|-------------------------------------------------------------------------------------------------------------------------------------------------------------------------------------------------------------------------------------------------------------------------------------------------------------------------------------------------------------------|--------------|
| Schmidt et al. (2021)           | Design: RCT<br>Setting: Outpatient, single center<br>Country: Spain<br>Funding: Other, mixed | <i>N</i> =102<br>G1 (52): Weekly group DBT interpersonal effectiveness skills training for 10 sessions<br>G2 (50): Weekly group DBT mindfulness skills training for 10 sessions<br>Duration: 10 weeks | Inclusion: Ages 18–50 years; DSM-IV BPD diagnosis; no comorbidities with schizophrenia, drug-induced psychosis, organic brain syndrome, SUD, bipolar disorder, intellectual disability, or MDE in course; no concurrent psychotherapy at study enrollment; no previous experience in mindfulness meditation and DBT skills training<br>Exclusion: NR | Mean age, <i>years</i> ( <i>SD</i> ):<br>G1: 33 (8.0)<br>G2: 32 (8.0)<br>Female: 93%<br>Race/ethnicity: NR | Primary outcome: Borderline severity (BSL-23) at 10 weeks<br>G2 significantly greater improvements on BSL-23 at 10 weeks (37.38 vs. 48.90, <i>P</i> =0.000) and on EQ at 10 weeks (31.28 vs. 27.48, <i>P</i> =0.001)<br>No differences between groups on DERS<br>Incidence of AEs: NR<br>Withdrawal due to AEs: NR<br>Attrition: NR<br>Differential attrition: NR | High         |

AE=adverse event; BDI=Beck Depression Inventory; BIS-11=Barrett Impulsiveness Scale-11; BPD=borderline personality disorder; BSL-23=Borderline Symptom List-23; DBT=dialectical behavior therapy; DERS=Difficulties in Emotion Regulation Scale; DIB-R=Diagnostic Interview for Borderlines-Revised; DMN=default mode network; DSM-IV=*Diagnostic and Statistical Manual of Mental Disorders*, 4th Edition; EQ=European Quality of Life; G1=Group 1; G2=Group 2; IQ=intelligence quotient; MDE=major depressive episode; *N*=sample size; NR=not reported; RCT=randomized controlled trial; SCID-II=Structured Clinical Interview for DSM-IV Axis II Personality Disorders; SD=standard deviation; STAI-S=State-Trait Anxiety Inventory-State; STAI-T=State-Trait Anxiety Inventory-Trait; SUD=substance use disorder.

## Dialectical Behavior Therapy vs. Cognitive Therapy

**TABLE D-15. Study characteristics and main results of DBT compared with CT**

| Author (year) and/or trial name | Study characteristics                                                                                  | Participants, <i>N</i> ; interventions; duration                                                                                                                                                                                                                                           | Study population, including main inclusion and exclusion criteria                                                                                                                                                                                                                                                                                                                                                                                          | Sample demographics                                                                                           | Primary outcome; main results; attrition                                                                                                                                                                                                                                                                                                                                                                                                                                  | Risk of bias |
|---------------------------------|--------------------------------------------------------------------------------------------------------|--------------------------------------------------------------------------------------------------------------------------------------------------------------------------------------------------------------------------------------------------------------------------------------------|------------------------------------------------------------------------------------------------------------------------------------------------------------------------------------------------------------------------------------------------------------------------------------------------------------------------------------------------------------------------------------------------------------------------------------------------------------|---------------------------------------------------------------------------------------------------------------|---------------------------------------------------------------------------------------------------------------------------------------------------------------------------------------------------------------------------------------------------------------------------------------------------------------------------------------------------------------------------------------------------------------------------------------------------------------------------|--------------|
| Lin et al. (2019)               | Design: RCT<br>Setting: Other: university counseling centers<br>Country: Taiwan<br>Funding: Government | <i>N</i> =82<br>G1 (40): Weekly CT group sessions, phone consultations as needed, and closed social media community for group members<br>G2 (42): Weekly DBT group skills training, phone consultation as needed, and closed social media community for group members<br>Duration: 8 weeks | Inclusion: College students; met criteria for BPD per BPDFS; score $\geq 21$ on Ko's Depression Inventory; one or more suicide attempts in past 6 months<br>Exclusions: Lifetime diagnosis of schizophrenia, schizoaffective disorder, bipolar disorder, or psychotic disorder; current severe depression and suicide risk indicating need for inpatient care and crisis intervention; current neurological signs and substance abuse during past 6 months | Mean age, years ( <i>SD</i> ):<br>G1: 20.47 (0.71)<br>G2: 20.40 (0.76)<br>Female: 87.8%<br>Race/ethnicity: NR | Primary outcome: Suicide attempt at 32 weeks<br>No significant difference between G1 and G2 on suicide reattempt (CMSADS-L Short form) and Ko's Depression Inventory at 32 weeks<br>Compared with G1, G2 significant improvements on BPDFS (5.87 vs. 4.91, $P < 0.01$ ) and in suicide ideation (ASIQ-S; 42.96 vs. 40.27, $P < 0.01$ ) at 32 weeks<br>Incidence of AEs: NR<br>Withdrawal due to AEs: NR<br>Attrition: 1%<br>Differential attrition: <10 percentage points | Moderate     |

AE=adverse event; ASIQ-S=Adult Suicidal Ideation Questionnaire-Shortened Version; BPD=borderline personality disorder; BPDFS=Borderline Personality Disorder Features Scale; CMSADS-L=Chinese Version of the Modified Schedule of Affective Disorders and Schizophrenia-Lifetime; CT=cognitive therapy; DBT=dialectical behavior therapy; G1=Group 1; G2=Group 2; *N*=sample size; NR=not reported; RCT=randomized controlled trial; SD=standard deviation.



## Dialectical Behavior Therapy vs. Community Therapy by Experts

**TABLE D-16. Study characteristics and main results of DBT compared with community therapy by experts**

| Author (year) and/or trial name | Study characteristics                                                                                    | Participants, <i>N</i> ; interventions; duration                                                                                                                                                      | Study population, including main inclusion and exclusion criteria                                                                                                                                                                                                                                                                                                                                 | Sample demographics                                                                                                                                                                         | Primary outcome; main results; attrition                                                                                                                                                                                                                                                                                                                                                                                                                          | Risk of bias |
|---------------------------------|----------------------------------------------------------------------------------------------------------|-------------------------------------------------------------------------------------------------------------------------------------------------------------------------------------------------------|---------------------------------------------------------------------------------------------------------------------------------------------------------------------------------------------------------------------------------------------------------------------------------------------------------------------------------------------------------------------------------------------------|---------------------------------------------------------------------------------------------------------------------------------------------------------------------------------------------|-------------------------------------------------------------------------------------------------------------------------------------------------------------------------------------------------------------------------------------------------------------------------------------------------------------------------------------------------------------------------------------------------------------------------------------------------------------------|--------------|
| Linehan et al. (2006)           | Design: RCT<br>Setting: Outpatient, single center<br>Country: United States<br>Funding: Government, NIMH | <i>N</i> =111<br>G1 (49): Community treatment by experts; developed specifically for this study to control for factors previously uncontrolled for in DBT studies<br>G2 (52): DBT<br>Duration: 1 year | Inclusion: Females; ages 18–45 years; BPD; two suicide attempts or self-injuries in past 5 years, with at least one occurring in past 8 weeks<br>Exclusion: Comorbid schizophrenia, schizoaffective disorder, bipolar, psychotic disorder, or intellectual disability; seizure disorder requiring medication; mandate to treatment; need for primary treatment for another debilitating condition | Mean age, years ( <i>SD</i> ): 29 (7.5)<br>Female: 100%<br>Race/ethnicity:<br>White: 87.0%<br>Black: 4.0%<br>Asian American: 2.0%<br>Native American or Alaskan Native: 1.0%<br>Other: 5.0% | Primary outcome: NR<br>G2 more effective than G1 in preventing suicide attempts (23% vs. 46%, <i>P</i> =0.01), ED visits for suicide ideation (10.6% vs. 18.4%, <i>P</i> =0.02), and hospital admissions for suicide ideation (14.9% vs. 18.4%, <i>P</i> =0.004)<br>No significant differences between groups on NSSI, Ham-D, and RLI<br>Incidence of AEs: NR<br>Withdrawal due to AEs: NR<br>Attrition:<br>Overall: 18%<br>G1: 27.5% (14/51)<br>G2: 10.0% (6/60) | High         |

AE=adverse event; BPD=borderline personality disorder; DBT=dialectical behavior therapy; ED=emergency department; G1=Group 1; G2=Group 2; Ham-D=Hamilton Rating Scale for Depression; *N*=sample size; NIMH=National Institute of Mental Health; NR=not reported; NSSI=nonsuicidal self-injury; RCT=randomized controlled trial; RLI=Reasons for Living Inventory; SD=standard deviation.

## Dialectical Behavior Therapy Plus REMS Treatments vs. REMS Treatments

**TABLE D-17. Study characteristics and main results of DBT plus REMS treatments compared with REMS treatments alone**

| Author (year) and/or trial name | Study characteristics                                                             | Participants, <i>N</i> ; interventions; duration                                                                                                                                           | Study population, including main inclusion and exclusion criteria                                                                                                    | Sample demographics                                                                 | Primary outcome; main results; attrition                                                                                                                                                                                             | Risk of bias |
|---------------------------------|-----------------------------------------------------------------------------------|--------------------------------------------------------------------------------------------------------------------------------------------------------------------------------------------|----------------------------------------------------------------------------------------------------------------------------------------------------------------------|-------------------------------------------------------------------------------------|--------------------------------------------------------------------------------------------------------------------------------------------------------------------------------------------------------------------------------------|--------------|
| Bianchini et al. (2019)         | Design: RCT<br>Setting: Inpatient, single center<br>Country: Italy<br>Funding: NR | <i>N</i> =21<br>G1 (11): REMS (Residenze per l'Esecuzione delle Misure di Sicurezza, a small-scale intensive therapeutic unit)<br>G2 (10): DBT plus REMS treatments<br>Duration: 12 months | Inclusion: Met criteria for BPD as measured by PAI; history of violence toward others<br>Exclusion: Cognitive deficit (IQ <70) and/or comorbid neurological diseases | Mean age, <i>years</i> ( <i>SD</i> ): 42 (8.14)<br>Female: 0%<br>Race/ethnicity: NR | Primary outcome: NR<br>No between-group comparisons at end of treatment<br>Significant change on only two outcomes, DERS and BIS-11, within intervention group<br>Incidence of AEs: NR<br>Withdrawal due to AEs: NR<br>Attrition: NR | Moderate     |

AE=adverse event; BIS-11=Barrett Impulsiveness Scale-11; BPD=borderline personality disorder; DBT=dialectical behavior therapy; DERS=Difficulties in Emotion Regulation Scale; G1=Group 1; G2=Group 2; IQ=intelligence quotient; *N*=sample size; NR=not reported; PAI=Personality Assessment Inventory; RCT=randomized controlled trial; REMS=Residenze per l'Esecuzione delle Misure di Sicurezza; SD=standard deviation.

## Dialectical Behavior Therapy vs. Conversational Model

**TABLE D-18. Study characteristics and main results of DBT compared with conversational model**

| Author (year) and/or trial name | Study characteristics                                                                             | Participants, <i>N</i> ; interventions; duration                                                                                                                                                               | Study population, including main inclusion and exclusion criteria                                                                                                                                                                                                                                                                                                                                                                                           | Sample demographics                                                                                                       | Primary outcome; main results; attrition                                                                                                                                                                                                                                                                                                                                                                                                                                                                                                                                      | Risk of bias |
|---------------------------------|---------------------------------------------------------------------------------------------------|----------------------------------------------------------------------------------------------------------------------------------------------------------------------------------------------------------------|-------------------------------------------------------------------------------------------------------------------------------------------------------------------------------------------------------------------------------------------------------------------------------------------------------------------------------------------------------------------------------------------------------------------------------------------------------------|---------------------------------------------------------------------------------------------------------------------------|-------------------------------------------------------------------------------------------------------------------------------------------------------------------------------------------------------------------------------------------------------------------------------------------------------------------------------------------------------------------------------------------------------------------------------------------------------------------------------------------------------------------------------------------------------------------------------|--------------|
| Walton et al. (2020)            | Design: RCT<br>Setting:<br>Outpatient,<br>single center<br>Country:<br>Australia<br>Funding: None | <i>N</i> =166<br>G1 (83): Conversational model involving twice-weekly individual therapy<br>G2 (83): Weekly DBT; individual therapy, group training, and access to after-hours coaching<br>Duration: 14 months | Inclusion: Ages 18–65 years; DSM-IV BPD; three or more suicidal and/or NSSI episodes in past 12 months<br>Exclusion: Disabling organic conditions, current acute psychotic illness, antisocial behavior that posed significant threat to staff and fellow patients, or developmental disability; substance dependence; living >1-hour's drive from treatment facility; inability to speak or read English; prior treatment with DBT or conversational model | Mean age, years ( <i>SD</i> ):<br>27 (7.8)<br>Female: 77%<br>Race/ethnicity:<br>White: 86%<br>Aboriginal: 6%<br>Other: 8% | Primary outcome: Suicide attempts and NSSI at 14 months and depression severity (BDI-II) at 14 months<br>No differences between groups in suicide attempts, NSSI, BPD severity (BPDSI-IV), interpersonal problems (IIP), dissociation (DES), and mindfulness at 14 months<br>G2 significantly greater reductions in BDI-II scores at 14 months (15.94 vs. 22.13, $P=0.005$ ) and greater improvements in emotion regulation (DERS; 87.08 vs. 105.16, $P=0.008$ )<br>Incidence of AEs: NR<br>Withdrawal due to AEs: NR<br>Attrition: 29%<br>G1: 24% (20/83)<br>G2: 34% (28/83) | Moderate     |

AE=adverse event; BDI-II=Beck Depression Inventory-II; BPD=borderline personality disorder; BPDSI-IV=Borderline Personality Disorder Severity Index-IV; DBT=dialectical behavior therapy; DERS=Difficulties in Emotion Regulation Scale; DES=Dissociative Experiences Scale; DSM-IV=*Diagnostic and Statistical Manual of Mental Disorders*, 4th Edition; G1=Group 1; G2=Group 2; IIP=Inventory of Interpersonal Problems; *N*=sample size; NR=not reported; NSSI=nonsuicidal self-injury; RCT=randomized controlled trial; SD=standard deviation.

## Dialectical Behavior Therapy Skills Training vs. Standard Group Therapy

**TABLE D-19. Study characteristics and main results of DBT compared with standard group therapy**

| Author (year) and/or trial name | Study characteristics                                                                      | Participants, <i>N</i> ; interventions; duration                                                                          | Study population, including main inclusion and exclusion criteria                                                                                                                                                                                                                                                               | Sample demographics                                                                                                  | Primary outcome; main results; attrition                                                                                                                                                                                                                                                                                                                                          | Risk of bias |
|---------------------------------|--------------------------------------------------------------------------------------------|---------------------------------------------------------------------------------------------------------------------------|---------------------------------------------------------------------------------------------------------------------------------------------------------------------------------------------------------------------------------------------------------------------------------------------------------------------------------|----------------------------------------------------------------------------------------------------------------------|-----------------------------------------------------------------------------------------------------------------------------------------------------------------------------------------------------------------------------------------------------------------------------------------------------------------------------------------------------------------------------------|--------------|
| Soler et al. (2009)             | Design: RCT<br>Setting: Outpatient, single center<br>Country: Spain<br>Funding: Government | <i>N</i> =60<br>G1 (30): Weekly standard group therapy<br>G2 (29): Weekly group DBT skills training<br>Duration: 12 weeks | Inclusion: Age s 18–45 years; met DSM-IV criteria for BPD as assessed by SCID-II and DIB-R; CGI-S score of $\geq 4$<br>Exclusion: Comorbid schizophrenia, drug-induced psychosis, organic brain syndrome, alcohol or other psychoactive SUD, bipolar disorder, intellectual disability, or MDE in course; current psychotherapy | Mean age, <i>years</i> ( <i>SD</i> ):<br>G1: 29.97 (5.63)<br>G2: 28.45 (6.55)<br>Female: 83.0%<br>Race/ethnicity: NR | Primary outcome: NR<br>No significant differences between G1 and G2 on CGI-BPD and SCL-90-R at 12 weeks<br>G2 significantly greater improvement on the Ham-D (11.1 vs. 16.0, $P=0.001$ ) and Ham-A (16.6 vs. 13.0, $P=0.03$ ) at 12 weeks<br>Incidence of AEs: NR<br>Withdrawal due to AEs: NR<br>Attrition: 49%<br>Differential attrition:<br>G1: 35% (10/29)<br>G2: 63% (19/30) | High         |

AE=adverse event; BPD=borderline personality disorder; CGI-BPD=Clinical Global Impression Scale for Borderline Personality Disorder; CGI-S=Clinical Global Impression-Severity; DBT=dialectical behavior therapy; DIB-R=Diagnostic Interview for Borderlines-Revised; DSM-IV=*Diagnostic and Statistical Manual of Mental Disorders*, 4th Edition; G1=Group 1; G2=Group 2; Ham-A=Hamilton Rating Scale for Anxiety; Ham-D=Hamilton Rating Scale for Depression; MDE=major depressive episode; *N*=sample size; NR=not reported; RCT=randomized controlled trial; SCID-II=Structured Clinical Interview for DSM-IV Axis II Disorders; SCL-90-R=Symptom Checklist-90-Revised; SD=standard deviation; SUD=substance use disorder.

## Dynamic Deconstructive Psychotherapy vs. Treatment as Usual

**TABLE D-20. Study characteristics and main results of DDP compared with TAU**

| Author (year) and/or trial name          | Study characteristics                                                                                          | Participants, <i>N</i> ; interventions; duration                                                                                                                                                                                                 | Study population, including main inclusion and exclusion criteria                                                                              | Sample demographics                                                                                                                       | Primary outcome; main results; attrition                                                                                                                                                                                                                                                                                                                                                                                                 | Risk of bias |
|------------------------------------------|----------------------------------------------------------------------------------------------------------------|--------------------------------------------------------------------------------------------------------------------------------------------------------------------------------------------------------------------------------------------------|------------------------------------------------------------------------------------------------------------------------------------------------|-------------------------------------------------------------------------------------------------------------------------------------------|------------------------------------------------------------------------------------------------------------------------------------------------------------------------------------------------------------------------------------------------------------------------------------------------------------------------------------------------------------------------------------------------------------------------------------------|--------------|
| Gregory and Sachdeva (2016) <sup>a</sup> | Design: Retrospective cohort<br>Setting: Outpatient, single center<br>Country: United States<br>Funding: APsaA | <i>N</i> =44<br>G1 (16): TAU: Unstructured psychotherapy<br>G2 (28): DDP: combined elements of translational neuroscience, object relations theory, and deconstructionist philosophy in weekly 1-hour individual sessions<br>Duration: 12 months | Inclusion: Age >18 years; BPD by SCID-II and Individual Assessment Profile<br>Exclusion: Schizophrenia, intellectual disabilities, or dementia | Mean age, <i>years</i> ( <i>SD</i> ):<br>G1: 29 (11.5)<br>G2: 28 (11.7)<br>Female: 81%<br>Race/ethnicity:<br>Caucasian: 88%<br>Other: 12% | Primary outcome: BEST at 12 months<br>G2 significantly more effective than G1 on change from baseline in BEST (14.1 vs. -2.6, $P=0.006$ ), BDI (-12.6 vs. -0.6, $P<0.001$ ), and SDS (-2.5 vs. 0.6, $P<0.001$ )<br>No significant differences in the number of suicide attempts and self-injuries<br>Incidence of AEs: NR<br>Withdrawal due to AEs: NR<br>Attrition: 53%<br>Differential attrition:<br>G1: 69% (11/16)<br>G2: 33% (9/27) | High         |

AE=adverse event; APsaA=American Psychoanalytic Association; BDI=Beck Depression Inventory; BEST=Borderline Evaluation of Severity Over Time; BPD=borderline personality disorder; DDP=dynamic deconstructive psychotherapy; G1=Group 1; G2=Group 2; *N*=sample size; NR=not reported; SCID-II=Structured Clinical Interview for DSM-IV Axis II Disorders; SD=standard deviation; SDS=Sheehan Disability Scale; TAU=treatment as usual.

<sup>a</sup>Gregory and Sachdeva (2016) is a three-arm trial. The two relevant arms to DDP vs. TAU are reported in this table; other eligible comparisons are reported in Tables D-7 and D-11.

## Mentalization-Based Treatment vs. Other Active Comparators

**TABLE D-21. Study characteristics and main results of MBT compared with other active comparators**

| Author (year) and/or trial name | Study characteristics                                                                                                                       | Participants, N; interventions; duration                                                                                                                                                                                                                                                                                                                                                                                                                                            | Study population, including main inclusion and exclusion criteria                                                                                                                                                                                                                                                                                                                                                            | Sample demographics                                                                                  | Primary outcome; main results; attrition                                                                                                                                                                                                                                                                                                                                                  | Risk of bias |
|---------------------------------|---------------------------------------------------------------------------------------------------------------------------------------------|-------------------------------------------------------------------------------------------------------------------------------------------------------------------------------------------------------------------------------------------------------------------------------------------------------------------------------------------------------------------------------------------------------------------------------------------------------------------------------------|------------------------------------------------------------------------------------------------------------------------------------------------------------------------------------------------------------------------------------------------------------------------------------------------------------------------------------------------------------------------------------------------------------------------------|------------------------------------------------------------------------------------------------------|-------------------------------------------------------------------------------------------------------------------------------------------------------------------------------------------------------------------------------------------------------------------------------------------------------------------------------------------------------------------------------------------|--------------|
| Beck et al. (2020); M-GAB       | Design: double-blinded RCT<br>Setting: Outpatient, multicenter<br>Country: Denmark<br>Funding: Government, region Zealand other, TrygFonden | N=112<br>G1 (56): Standardized to at least 12 individual monthly sessions, and additional contact varied across clinics and therapists and according to patient need; therapists were nurses, psychologists, social workers, or psychiatrists not trained in or practicing MBT; treatment was not manualized<br>G2 (56): MBT delivered as a 1-year program with three components: 1) MBT introduction, 2) MBT group, and 3) MBT parents (90-minute sessions)<br>Duration: 12 months | Inclusion: Ages 14–17 years; met four or more DSM-5 BPD criteria and total score above clinical cutoff (>67) on BPFS-C<br>Exclusion: Comorbid PDD, learning disability (IQ <75), anorexia, psychosis, schizophrenia or schizotypal personality disorder, ASPD, or any mental disorder other than BPD considered primary diagnosis; current SUD (past 2 months; not substance abuse); current psychiatric inpatient treatment | Mean age, years (SD):<br>G1: 16 (1.0)<br>G2: 16 (1.1)<br>Female: 99% (111/112)<br>Race/ethnicity: NR | Primary outcome: BPFS-C<br>No significant differences between G2 and G1 on BPFS-C, BPFS for Parent, ZAN-BPD, Risk-Taking and Self-Harm Inventory for Adolescents, BDI for Youth, internalizing or externalizing symptoms on Youth Self-Report, Child Behavior Checklist, or Children's GAS<br>Report of any AEs: 0<br>Attrition: 25.0% (28/112)<br>G1: 19.6% (11/56)<br>G2: 30.3% (17/56) | High         |

AE=adverse event; ASPD=antisocial personality disorder; BDI=Beck Depression Inventory; BPD=borderline personality disorder; BPFS=Borderline Personality Features Scale; BPFS-C=Borderline Personality Features Scale for Children; DSM-5=Diagnostic and Statistical Manual of Mental Disorders, 5th Edition; G1=Group 1; G2=Group 2; GAS=Global Assessment Scale; IQ=intelligence quotient; MBT=mentalization-based treatment; M-GAB=Mentalization-Based Treatment in Groups for Adolescents with Borderline Personality Disorder; N=sample size; NR=not reported; RCT=randomized controlled trial; SD=standard deviation; SUD=substance use disorder; ZAN-BPD=Zanarini Rating Scale for Borderline Personality Disorder.

## Mentalization-Based Treatment vs. Supportive Therapy

**TABLE D–22. Study characteristics and main results of MBT compared with supportive therapy**

| Author (year) and/or trial name                  | Study characteristics                                                                                       | Participants, <i>N</i> ; interventions; duration                                                                                                                                                                                                                                                                                                                    | Study population, including main inclusion and exclusion criteria                                                                                                                                                                                                                                                                                                         | Sample demographics                                                                                                                        | Primary outcome; main results; attrition                                                                                                                                                                                                                                                                                                                                                                                                                                                                                                                                                                                                                                                                                                                                                                                                                                                                                                                                                                                                                                                                                                                                                                                                                              | Risk of bias |
|--------------------------------------------------|-------------------------------------------------------------------------------------------------------------|---------------------------------------------------------------------------------------------------------------------------------------------------------------------------------------------------------------------------------------------------------------------------------------------------------------------------------------------------------------------|---------------------------------------------------------------------------------------------------------------------------------------------------------------------------------------------------------------------------------------------------------------------------------------------------------------------------------------------------------------------------|--------------------------------------------------------------------------------------------------------------------------------------------|-----------------------------------------------------------------------------------------------------------------------------------------------------------------------------------------------------------------------------------------------------------------------------------------------------------------------------------------------------------------------------------------------------------------------------------------------------------------------------------------------------------------------------------------------------------------------------------------------------------------------------------------------------------------------------------------------------------------------------------------------------------------------------------------------------------------------------------------------------------------------------------------------------------------------------------------------------------------------------------------------------------------------------------------------------------------------------------------------------------------------------------------------------------------------------------------------------------------------------------------------------------------------|--------------|
| Bateman and Fonagy (2009); Bateman et al. (2021) | Design: RCT<br>Setting: Out-patient, single center<br>Country: United Kingdom<br>Funding: Other, foundation | <i>N</i> =134<br>G1 (63): SCM individual and group sessions plus medication; therapy based on supportive approach with case management, advocacy support, and problem-oriented psychotherapeutic interventions<br>G2 (71): MBT plus medication; 18-month manualized weekly combined individual and group psychotherapy<br>Duration: 18 months<br>Follow-up: 6 years | Inclusion: Ages 18–65 years; DSM-IV BPD diagnosis; suicide attempt or episode of life-threatening self-harm within past 6 months<br>Exclusion: Current long-term psychotherapeutic treatment; met DSM-IV criteria for psychotic disorder or bipolar I disorder; opiate dependence requiring specialist treatment; mental impairment or evidence of organic brain disorder | Mean age, years ( <i>SD</i> ):<br>G1: 31 (7.9)<br>G2: 31 (7.6)<br>Female: 80%<br>Race/ethnicity:<br>White: 72%<br>Black: 18%<br>Other: 10% | Primary outcome: Suicide, self-injury, and hospitalizations at 18 months<br>At 18 months, G2 significantly more effective than G1 in reducing life-threatening suicide attempts in prior 6-month period on SCL-90-R (0.03 vs. 0.32, $P<0.001$ ), reducing severe self-harm incidents on SCL-90-R (0.38 vs. 1.66, $P<0.001$ ), and reducing hospitalizations (0.03 vs. 0.19, $P<0.001$ ) (composite of all three measures, 0.5 vs. 2.2, $P<0.001$ )<br>At 18 months, G2 greater improvement in 6-month periods free of suicidal behavior, severe self-harm, and hospitalizations (OR 0.28, 95% CI 0.13–0.61, $P<0.002$ )<br>G2 significantly greater than G1 in number of participants who achieved primary recovery criteria (free of self-harm, suicide attempts, or inpatient hospital stays) and who remained well over 6-year follow-up period (75% vs. 51%, $P=0.02$ )<br>At 18 months, G2 significantly greater improvements in BDI (14.80 vs. 18.68, $P<0.01$ ), IIP (1.28 vs. 1.65, $P<0.001$ ), SCL-90-GSI (1.12 vs. 1.55, $P<0.001$ ), and GAF (60.9 vs. 53.2, $P<0.001$ )<br>Incidence of AEs: NR at 18 months<br>Withdrawal due to AEs: NR<br>Attrition: 26% at 18 months; 39% at 6 years post-treatment<br>Differential attrition: <10 percentage points | Moderate     |

**TABLE D-22. Study characteristics and main results of MBT compared with supportive therapy (continued)**

| Author (year) and/or trial name | Study characteristics                                                                     | Participants, <i>N</i> ; interventions; duration                                                                                                                                                                                       | Study population, including main inclusion and exclusion criteria                                                                                                                                                                                 | Sample demographics                                                                                                                                                             | Primary outcome; main results; attrition                                                                                                                                                                                                                                                               | Risk of bias |
|---------------------------------|-------------------------------------------------------------------------------------------|----------------------------------------------------------------------------------------------------------------------------------------------------------------------------------------------------------------------------------------|---------------------------------------------------------------------------------------------------------------------------------------------------------------------------------------------------------------------------------------------------|---------------------------------------------------------------------------------------------------------------------------------------------------------------------------------|--------------------------------------------------------------------------------------------------------------------------------------------------------------------------------------------------------------------------------------------------------------------------------------------------------|--------------|
| Carlyle et al. (2020)           | Design: RCT<br>Setting: Out-patient, single center<br>Country: New Zealand<br>Funding: NR | <i>N</i> =72<br>G1 (34): Enhanced therapeutic case management with case managers using published manual of SCM<br>G2 (38): MBT: manualized weekly 1-hour individual sessions and weekly 1.5-hour group sessions<br>Duration: 18 months | Inclusion: BPD diagnosis using SCID-II<br>Exclusion: Patients diagnosed with psychoses or primary substance dependence; insufficient proficiency in English; concurrent engagement in structured psychological treatment for personality disorder | Mean age, <i>years</i> ( <i>SD</i> ):<br>G1: 32 (11.7)<br>G2: 32 (9.8)<br>Female: 99%<br>Race/ethnicity:<br>NZ European: 79%<br>Maori: 6%<br>European other: 12.5%<br>Other: 3% | Primary outcome: NSSI and suicide attempts at 18 months<br>At 18 months, no significant differences between groups on incidents of NSSI, suicide attempts, or hospitalizations<br>Incidence of AEs: NR<br>Withdrawal due to AEs: NR<br>Attrition: 14%<br>Differential attrition: <10 percentage points | Moderate     |



**TABLE D-22. Study characteristics and main results of MBT compared with supportive therapy (continued)**

| Author (year) and/or trial name | Study characteristics                                                                 | Participants, <i>N</i> ; interventions; duration                                                                                                                                                                                                                                   | Study population, including main inclusion and exclusion criteria                                                                                                                                                                                                  | Sample demographics                                                                                 | Primary outcome; main results; attrition                                                                                                                                                                                                                                                                                     | Risk of bias |
|---------------------------------|---------------------------------------------------------------------------------------|------------------------------------------------------------------------------------------------------------------------------------------------------------------------------------------------------------------------------------------------------------------------------------|--------------------------------------------------------------------------------------------------------------------------------------------------------------------------------------------------------------------------------------------------------------------|-----------------------------------------------------------------------------------------------------|------------------------------------------------------------------------------------------------------------------------------------------------------------------------------------------------------------------------------------------------------------------------------------------------------------------------------|--------------|
| Jørgensen et al. (2013)         | Design: RCT<br>Setting: Out-patient, single center<br>Country: Denmark<br>Funding: NR | <i>N</i> =111 randomized; <i>n</i> =85 treated<br>G1 (27): Biweekly group therapy and monthly group psychoeducational program for 6 months<br>G2 (58): Weekly individual and group MBT therapy and monthly group MBT psychoeducational program for 6 months<br>Duration: 24 months | Inclusion: Age ≥21 years; met DSM-IV BPD criteria as assessed by SCID-II; GAF score >34<br>Exclusion: Met diagnostic criteria for antisocial or paranoid personality disorder at time of assessment; severe substance abuse (daily) requiring specialist treatment | Mean age, years ( <i>SD</i> ):<br>G1: 30 (6.8)<br>G2: 30 (6.5)<br>Female: 96%<br>Race/ethnicity: NR | Primary outcome: GAF at 24 months<br>At 24 months, G2 significantly greater improvement than G1 on therapist-rated GAF-F (56.7 vs. 51.3, <i>P</i> =0.007) and GAF-S (58.5 vs. 54.0, <i>P</i> <0.001)<br>Incidence of AEs: NR<br>Withdrawal due to AEs: NR<br>Attrition: 32%<br>Differential attrition: <10 percentage points | High         |

AE=adverse event; BDI=Beck Depression Inventory; BPD=borderline personality disorder; CI=confidence interval; DSM-IV=*Diagnostic and Statistical Manual of Mental Disorders*, 4th Edition; G1=Group 1; G2=Group 2; GAF=Global Assessment of Functioning; GAF-F=Global Assessment of Functioning-Functioning; GAF-S=Global Assessment of Functioning-Symptoms; IIP=Inventory of Interpersonal Problems; MBT=mentalization-based treatment; *N*=sample size; NR=not reported; OR=odds ratio; RCT=randomized controlled trial; SCID-II=Structured Clinical Interview for DSM-IV Axis II Personality Disorders; SCL-90-R=Symptom Checklist-90-Revised; SCL-90-GSI=Symptom Checklist-90-Global Severity Index; SCM=structured clinical management; SD=standard deviation.

## Mentalization-Based Treatment vs. Psychodynamic Treatment Program

**TABLE D-23. Study characteristics and main results of MBT compared with psychodynamic treatment program**

| Author (year) and/or trial name | Study characteristics                                                                              | Participants, <i>N</i> ; interventions; duration                                                                                                                                                                                               | Study population, including main inclusion and exclusion criteria                                                                                                                                                                | Sample demographics                                                                                          | Primary outcome; main results; attrition                                                                                                                                                                                                                                                                                                                                                                                  | Risk of bias |
|---------------------------------|----------------------------------------------------------------------------------------------------|------------------------------------------------------------------------------------------------------------------------------------------------------------------------------------------------------------------------------------------------|----------------------------------------------------------------------------------------------------------------------------------------------------------------------------------------------------------------------------------|--------------------------------------------------------------------------------------------------------------|---------------------------------------------------------------------------------------------------------------------------------------------------------------------------------------------------------------------------------------------------------------------------------------------------------------------------------------------------------------------------------------------------------------------------|--------------|
| Kvarstein et al. (2015)         | Design: Prospective cohort<br>Setting: Outpatient, single center<br>Country: Norway<br>Funding: NR | <i>N</i> =345<br>G1 (281): 18 weeks of weekly inpatient group therapies followed by weekly outpatient group therapy<br>G2 (64): Weekly individual and group MBT therapy and monthly group MBT psychoeducational program<br>Duration: 36 months | Inclusion: NR; assessed baseline diagnostic status with the M.I.N.I. version 4.4 for DSM Axis-I diagnosis and SCID-II at baseline<br>Exclusion: Treated in transition period between G1 and G2; included in RCT during 2004–2006 | Mean age, <i>years</i> ( <i>SD</i> ):<br>G1: 30 (7.0)<br>G2: 26 (6.0)<br>Female: 83.2%<br>Race/ethnicity: NR | Primary outcome: GAF, CIP, BSI-18 at 36 months<br>G2 significantly greater improvements on CIP (0.9 vs. 1.4, $P<0.001$ ), BSI-18 (0.8 vs. 0.9, $P<0.001$ ), and GAF (63.0 vs. 56.0, $P<0.001$ )<br>No difference between G1 and G2 in self-harm and suicide attempts at 36 months<br>Incidence of AEs: NR<br>Withdrawal due to AEs: NR<br>Attrition: 16%<br>Differential attrition:<br>G1: 8% (22/281)<br>G2: 50% (32/64) | High         |

AE=adverse event; BPD=borderline personality disorder; BSI-18=Brief Symptom Inventory-18; CIP=Circumplex of Interpersonal Problems; DSM=*Diagnostic and Statistical Manual of Mental Disorders*; G1=Group 1; G2=Group 2; GAF=Global Assessment of Functioning; MBT=mentalization-based treatment; M.I.N.I.=Mini International Neuropsychiatric Interview; *N*=sample size; NR=not reported; RCT=randomized controlled trial; SCID-II=Structured Clinical Interview for DSM-IV Axis II Disorders; SD=standard deviation.

## Day-Hospital Mentalization-Based Treatment vs. Specialized Psychotherapy

**TABLE D–24. Study characteristics and main results of day-hospital MBT compared with specialized psychotherapy**

| Author (year) and/or trial name | Study characteristics                                                                                   | Participants, <i>N</i> ; interventions; duration                                                                                                                                                                                                                                                                                                                                                                                                                   | Study population, including main inclusion and exclusion criteria                                                                                                                        | Sample demographics                                                                                                          | Primary outcome; main results; attrition                                                                                                                                                                                                                                                                                                                                                                         | Risk of bias |
|---------------------------------|---------------------------------------------------------------------------------------------------------|--------------------------------------------------------------------------------------------------------------------------------------------------------------------------------------------------------------------------------------------------------------------------------------------------------------------------------------------------------------------------------------------------------------------------------------------------------------------|------------------------------------------------------------------------------------------------------------------------------------------------------------------------------------------|------------------------------------------------------------------------------------------------------------------------------|------------------------------------------------------------------------------------------------------------------------------------------------------------------------------------------------------------------------------------------------------------------------------------------------------------------------------------------------------------------------------------------------------------------|--------------|
| Bales et al. (2015)             | Design: Non-concurrent cohort<br>Setting: Other day-hospital<br>Country: The Netherlands<br>Funding: NR | <i>N</i> =204<br>G1 (175): Variety of psychotherapeutic treatments in in-patient, outpatient, and day-hospital settings<br>G2 (29): MBT in a day-hospital setting; daily group therapy, weekly individual therapy, individual crisis planning and art therapy twice a week, mentalizing cognitive group therapy, and writing therapy; medication consultation when indicated<br>Duration: 18-month treatment phase; actual treatment was mean of 15.5 months (3.8) | Inclusion: Age ≥18 years; met DSM-IV criteria for BPD<br>Exclusion: Schizophrenia, ADHD, bipolar disorder, psychotic disorders, or SUDs; intellectual impairment; organic brain disorder | Mean age, <i>years</i> ( <i>SD</i> ):<br>G1: 30 (7.9)<br>G2: 30 (6.2)<br>Female:<br>G1: 86%<br>G2: 69%<br>Race/ethnicity: NR | Primary outcome: Psychiatric symptoms, personality functioning at 18 months<br>G2 significantly greater improvements than G1 on GSI at 18 months (1.04 vs. 1.21, <i>P</i> =0.01) and 36 months (0.73 vs. 1.04, <i>P</i> =0.02)<br>G2 favored on SIPP-118 changes in (mal)adaptive personality functioning (results NR)<br>Incidence of AEs: NR<br>Withdrawal due to AEs: NR<br>Attrition: NR (could assume none) | High         |

**TABLE D-24. Study characteristics and main results of day-hospital MBT compared with specialized psychotherapy (continued)**

| Author (year) and/or trial name | Study characteristics                                                                                                                       | Participants, <i>N</i> ; interventions; duration                                                                                                                                                                                                                                                                                         | Study population, including main inclusion and exclusion criteria                                                                                                                           | Sample demographics                                                                                  | Primary outcome; main results; attrition                                                                                                                                                                                                                                                            | Risk of bias |
|---------------------------------|---------------------------------------------------------------------------------------------------------------------------------------------|------------------------------------------------------------------------------------------------------------------------------------------------------------------------------------------------------------------------------------------------------------------------------------------------------------------------------------------|---------------------------------------------------------------------------------------------------------------------------------------------------------------------------------------------|------------------------------------------------------------------------------------------------------|-----------------------------------------------------------------------------------------------------------------------------------------------------------------------------------------------------------------------------------------------------------------------------------------------------|--------------|
| Laurensen et al. (2018)         | Design: RCT<br>Setting: Other in-patient and out-patient therapies, multicenter<br>Country: The Netherlands<br>Funding: Other, organization | <i>N</i> =95<br>G1 (41): Manualized psychiatric treatment and system-oriented tailored care<br>G2 (54): Day-hospital MBT consisting of daily group psychotherapy, weekly individual psychotherapy, individual crisis planning, art therapy twice a week, mentalizing cognitive group therapy, and writing therapy<br>Duration: 18 months | Inclusion: Met DSM-IV criteria for BPD; score of $\geq 20$ on BPDSI<br>Exclusion: Schizophrenia or bipolar disorder; substance abuse requiring specialist treatment; organic brain disorder | Mean age, years ( <i>SD</i> ):<br>G1: 34 (10.6)<br>G2: 34 (9.4)<br>Female: 79%<br>Race/ethnicity: NR | Primary outcome: BPDSI total score at 18 months<br>At 18 months, no significant differences between groups on any outcome<br>Incidence of AEs (among completers):<br>G1: 0% (0/15)<br>G2: 0% (0/33)<br>Withdrawal due to AEs: NR<br>Attrition: 50%<br>Differential attrition: <10 percentage points | Moderate     |

ADHD=attention-deficit/hyperactivity disorder; AE=adverse event; BPD=borderline personality disorder; BPDSI=Borderline Personality Disorder Severity Index; DSM-IV=*Diagnostic and Statistical Manual of Mental Disorders*, 4th Edition; G1=Group 1; G2=Group 2; GSI=Global Severity Index; MBT=mentalization-based treatment; *N*=sample size; NR=not reported; RCT=randomized controlled trial; SD=standard deviation; SIPP-118=Severity Indices of Personality Problems; SUD=substance use disorder.

# Systems Training for Emotional Predictability and Problem Solving vs. Treatment as Usual

**TABLE D–25. Study characteristics and main results of STEPPS compared with TAU**

| Author (year) and/or trial name | Study characteristics                                                                                                     | Participants, <i>N</i> ; interventions; duration                                                                                                                                                                                                                                                                                                                                                                                                                                                                              | Study population, including main inclusion and exclusion criteria                                                                                                                                                                                   | Sample demographics                                                                                                                                                 | Primary outcome; main results; attrition                                                                                                                                                                                                                                                                                                                                                                                                                                                                                                                                                                                                                                                                                                                                                                                                                                                                                                                                | Risk of bias |
|---------------------------------|---------------------------------------------------------------------------------------------------------------------------|-------------------------------------------------------------------------------------------------------------------------------------------------------------------------------------------------------------------------------------------------------------------------------------------------------------------------------------------------------------------------------------------------------------------------------------------------------------------------------------------------------------------------------|-----------------------------------------------------------------------------------------------------------------------------------------------------------------------------------------------------------------------------------------------------|---------------------------------------------------------------------------------------------------------------------------------------------------------------------|-------------------------------------------------------------------------------------------------------------------------------------------------------------------------------------------------------------------------------------------------------------------------------------------------------------------------------------------------------------------------------------------------------------------------------------------------------------------------------------------------------------------------------------------------------------------------------------------------------------------------------------------------------------------------------------------------------------------------------------------------------------------------------------------------------------------------------------------------------------------------------------------------------------------------------------------------------------------------|--------------|
| Blum et al. (2008); STEPPS      | Design: RCT<br>Setting: Other outpatient, inpatient, and community<br>Country: United States<br>Funding: Government, NIMH | <i>N</i> =165<br>G1 (72 [data analysis based on 65]): TAU; 20 weeks of continued usual care, including individual psychotherapy, medication, and case management<br>G2 (93 [data analysis based on 59]): STEPPS plus individual therapy; 20 sessions (2 hours/week) of manual-based STEPPS group treatment that combines cognitive-behavioral elements with skills training; components included psychoeducation about BPD, emotion management skills training, and behavior management skills training<br>Duration: 20 weeks | Inclusion: Subjects with DSM-IV BPD who could designate a mental health professional and friend or relative to serve as system members<br>Exclusion: Non-English speaker; psychotic or primary neurological disorder; prior participation in STEPPS | Among 124 who received allocated intervention:<br>Mean age, years ( <i>SD</i> ): 32 (9.5)<br>Female: 83%<br>Race/ethnicity:<br>White: 95%<br>Black: 2%<br>Other: 3% | Primary outcome: BPD-specific psychiatric symptoms (ZAN-BPD) measured at 20 weeks<br>Significantly improved symptoms of BPD with G2 than G1 at 20 weeks on ZAN-BPD (9.8 vs. 13.4, <i>P</i> =0.001)<br>Significantly improved impulsivity of BPD with G2 than G1 on BIS (72.7 vs. 76.8, <i>P</i> =0.004)<br>Significantly improved depression on BDI (22.0 vs. 25.8, <i>P</i> =0.03)<br>Significantly improved global impressions and functioning with G2 than G1 on SCL-90 (12.5 vs. 14.1, <i>P</i> =0.03), CGI-S (4.4 vs. 4.7, <i>P</i> <0.001), CGI-I (2.7 vs. 3.8, <i>P</i> <0.001), and GAS (50.5 vs. 43.5, <i>P</i> <0.001)<br>No significant differences between groups on suicide attempts and self-harm acts (BEST); on SCL-90, BDI, CGI, and GAS between 20 weeks and 1 year; or SAS at 20 weeks or 20 weeks to 1 year<br>Incidence of AEs: NR<br>Withdrawal due to AEs: NR<br>Attrition: 42%<br>Differential attrition:<br>G1: 29% (21/72)<br>G2: 52% (48/93) | High         |

**TABLE D-25. Study characteristics and main results of STEPPS compared with TAU (continued)**

| Author (year) and/or trial name | Study characteristics                                                                         | Participants, <i>N</i> ; interventions; duration                                                                                                                                                                                                                                                               | Study population, including main inclusion and exclusion criteria                                                                                                                                                                                                                                              | Sample demographics                                                                                        | Primary outcome; main results; attrition                                                                                                                                                                                                                                                                                                                                                                                                                                              | Risk of bias |
|---------------------------------|-----------------------------------------------------------------------------------------------|----------------------------------------------------------------------------------------------------------------------------------------------------------------------------------------------------------------------------------------------------------------------------------------------------------------|----------------------------------------------------------------------------------------------------------------------------------------------------------------------------------------------------------------------------------------------------------------------------------------------------------------|------------------------------------------------------------------------------------------------------------|---------------------------------------------------------------------------------------------------------------------------------------------------------------------------------------------------------------------------------------------------------------------------------------------------------------------------------------------------------------------------------------------------------------------------------------------------------------------------------------|--------------|
| Bos et al. (2010)               | Design: RCT<br>Setting: Outpatient, multicenter<br>Country: The Netherlands<br>Funding: Other | <i>N</i> =79<br>G1 (37): TAU<br>G2 (42): STEPPS plus individual therapy:<br>18 weekly sessions of STEPPS and follow-up session 3–6 months after intervention; components included psychoeducation about BPD, emotion management skills training, and behavior management skills training<br>Duration: 24 weeks | Inclusion: Met DSM-IV criteria for BPD by administering BPD modules and SCID-II; BDSI-IV with scores exceeding established cutoff on one or both subscales<br>Exclusion: Did not speak Dutch; cognitively impaired (IQ <70); age <18 years; treated involuntarily; presented imminent danger to self or others | Mean age, <i>years</i> ( <i>SD</i> ):<br>G1: 32 (9.2)<br>G2: 32 (5.6)<br>Female: 86%<br>Race/ethnicity: NR | Primary outcome: BPD-specific (BPD-40) and general psychiatric symptoms (SCL-90) at 1 year<br>Significantly improved BPD-specific symptoms (BPD-40: 78.2 vs. 88.6, <i>P</i> =0.001), general psychiatric symptoms (SCL-90: 199.2 vs. 222.7, <i>P</i> =0.001), and quality of life (WHO-QOL-Bref: 12.6 vs. 11.3, <i>P</i> =0.006) for G2 than G1<br>Incidence of AEs: NR<br>Withdrawal due to AEs: NR<br>Attrition: 17%<br>Differential attrition:<br>G1: 21% (9/42)<br>G2: 11% (4/37) | Moderate     |

**TABLE D-25. Study characteristics and main results of STEPPS compared with TAU (continued)**

| Author (year) and/or trial name | Study characteristics                                                                                | Participants, <i>N</i> ; interventions; duration                                                                                                                                                                                                                                                                                                                                                              | Study population, including main inclusion and exclusion criteria                                                                                                                                                                                                                                                                            | Sample demographics                                                                      | Primary outcome; main results; attrition                                                                                                                                                                                                                        | Risk of bias |
|---------------------------------|------------------------------------------------------------------------------------------------------|---------------------------------------------------------------------------------------------------------------------------------------------------------------------------------------------------------------------------------------------------------------------------------------------------------------------------------------------------------------------------------------------------------------|----------------------------------------------------------------------------------------------------------------------------------------------------------------------------------------------------------------------------------------------------------------------------------------------------------------------------------------------|------------------------------------------------------------------------------------------|-----------------------------------------------------------------------------------------------------------------------------------------------------------------------------------------------------------------------------------------------------------------|--------------|
| González-González et al. (2021) | Design: Prospective cohort<br>Setting: Out-patient, single center<br>Country: Spain<br>Funding: None | <i>N</i> =118<br>G1 (98 [data analysis based on 28]): TAU<br>G2 (20 [data analysis based on 9]): STEPPS: 20 weekly sessions of group STEPPS psychotherapy, 5 sessions of group psychotherapy for companions, monthly sessions of individual and family psychotherapy, and possibility of therapy in case of emergency; combined with usual medication and/or psychiatric consultations<br>Duration: 18 months | Inclusion: DSM-5 BPD diagnosis, including self-harm or aggressive impulsive behaviors for past 2 years<br>Exclusion: Acute patients or those with comorbid pathology; cognitive, intellectual, or psychopathological impairment for daily life activities requiring care in rehabilitation center; receiving another psychotherapy treatment | Mean age, <i>years</i> ( <i>range</i> ): 34 (18–58)<br>Female: 85%<br>Race/ethnicity: NR | Primary outcome: NR<br>Significantly improved BPD-specific symptoms (BEST: 47.3 [14.1] vs. 28.8 [10.9], <i>P</i> <0.01)<br>Incidence of AEs: NR<br>Withdrawal due to AEs: NR<br>Attrition: 59%<br>Differential attrition:<br>G1: 55% (11/20)<br>G2: 71% (70/98) | High         |

AE=adverse event; BDI=Beck Depression Inventory; BDI-IV=Borderline Syndrome Index IV; BEST=Borderline Evaluation of Severity Over Time; BIS=Barratt Impulsivity Scale; BPD=borderline personality disorder; BPD-40=Borderline Personality Disorder checklist-40; CGI=Clinical Global Impressions; CGI-I=Clinical Global Impression-Improvement; CGI-S=Clinical Global Impression-Severity; DSM-IV=*Diagnostic and Statistical Manual of Mental Disorders*, 4th Edition; DSM-5=*Diagnostic and Statistical Manual of Mental Disorders*, 5th Edition; G1=Group 1; G2=Group 2; GAS=Global Assessment Scale; IQ=intelligence quotient; *N*=sample size; NIMH=National Institute of Mental Health; NR=not reported; RCT=randomized controlled trial; SAS=Social Adjustment Scale; SCID-II=Structured Clinical Interview for DSM-IV Axis II Disorders; SCL-90=Symptom Checklist-90; SD=standard deviation; STEPPS=systems training for emotional predictability and problem-solving; TAU=treatment as usual; WHOQOL-Bref=World Health Organization Quality of Life Bref; ZAN-BPD=Zanarini Rating Scale for Borderline Personality Disorder.

## Transference-Focused Psychotherapy vs. Treatment as Usual

**TABLE D-26. Study characteristics and main results of TFP compared with TAU**

| Author (year) and/or trial name | Study characteristics                                                                                              | Participants, <i>N</i> ; interventions; duration                                                                                                                                                                                                                       | Study population, including main inclusion and exclusion criteria                                                                                                                                                                                                                                                                     | Sample demographics                                                                                  | Primary outcome; main results; attrition                                                                                                                                                                                                                                                                                                                                                                                                                                                                                                                                                                                                                      | Risk of bias |
|---------------------------------|--------------------------------------------------------------------------------------------------------------------|------------------------------------------------------------------------------------------------------------------------------------------------------------------------------------------------------------------------------------------------------------------------|---------------------------------------------------------------------------------------------------------------------------------------------------------------------------------------------------------------------------------------------------------------------------------------------------------------------------------------|------------------------------------------------------------------------------------------------------|---------------------------------------------------------------------------------------------------------------------------------------------------------------------------------------------------------------------------------------------------------------------------------------------------------------------------------------------------------------------------------------------------------------------------------------------------------------------------------------------------------------------------------------------------------------------------------------------------------------------------------------------------------------|--------------|
| Doering et al. (2010)           | Design: RCT<br>Setting: Outpatient, multicenter<br>Countries: Austria and Germany<br>Funding: Other, Austrian bank | <i>N</i> =104<br>G1 (52): TAU: treatment by community psychotherapists and medication treatments as needed<br>G2 (52): TFP: Two 50-minute sessions every week from experienced clinical psychologists or medical doctors; medications as needed<br>Duration: 12 months | Inclusion: Female; ages 18–45 years; DSM-IV BPD diagnosis; sufficient knowledge of German language<br>Exclusions: ASPD, schizophrenia, or bipolar I and II disorder with a major depressive, manic, or hypomanic episode during the previous 6 months; SUD during the previous 6 months; organic pathology or intellectual disability | Mean age, years ( <i>SD</i> ):<br>G1: 27 (7.5)<br>G2: 28 (6.8)<br>Female: 100%<br>Race/ethnicity: NR | Primary outcome: Suicide attempts, dropout from therapy at 12 months<br>Significantly fewer suicide attempts with G2 than G1 (13.7% vs. 21.2%, $P=0.009$ ) for LOCF analysis but not for completers analysis ( $P\geq 0.025$ )<br>G2 significantly more effective than G1 for achieving fewer than five DSM-IV criteria for BPD (42.3% vs. 15.4%, $P=0.002$ ) and on GAF (58.62 vs. 56.06, $P=0.002$ )<br>No significant differences for self-harm acts, severity of symptoms, depression (BDI), and anxiety (STAI)<br>Incidence of AEs: NR<br>Withdrawal due to AEs: NR<br>Attrition: 34%<br>Differential attrition:<br>G1: 42.3% (22/52)<br>G2: 25% (13/52) | High         |

AE=adverse event; ASPD=antisocial personality disorder; BDI=Beck Depression Inventory; BPD=borderline personality disorder; DSM-IV=*Diagnostic and Statistical Manual of Mental Disorders*, 4th Edition; G1=Group 1; G2=Group 2; GAF=Global Assessment of Functioning; LOCF=last observation carried forward; *N*=sample size; NR=not reported; RCT=randomized controlled trial; SD=standard deviation; STAI=State-Trait Anxiety Inventory; SUD=substance use disorder; TAU=treatment as usual; TFP=transference-focused psychotherapy.



## Transference-Focused Psychotherapy vs. Schema-Focused Therapy

**TABLE D-27. Study characteristics and main results of TFP compared with SFT**

| Author (year) and/or trial name                    | Study characteristics                                                                                                                 | Participants, <i>N</i> ; interventions; duration                                                                                                                            | Study population, including main inclusion and exclusion criteria                                                                                                                                                                                 | Sample demographics                                                                                            | Primary outcome; main results; attrition                                                                                                                                                                                                                                                                                 | Risk of bias |
|----------------------------------------------------|---------------------------------------------------------------------------------------------------------------------------------------|-----------------------------------------------------------------------------------------------------------------------------------------------------------------------------|---------------------------------------------------------------------------------------------------------------------------------------------------------------------------------------------------------------------------------------------------|----------------------------------------------------------------------------------------------------------------|--------------------------------------------------------------------------------------------------------------------------------------------------------------------------------------------------------------------------------------------------------------------------------------------------------------------------|--------------|
| Giesen-Bloo et al. (2006); Spinhoven et al. (2007) | Design: RCT<br>Setting: Outpatient, multicenter<br>Country: The Netherlands<br>Funding: Government, Dutch Health Care Insurance Board | <i>N</i> =88<br>G1 (43): TFP: 50-minute sessions twice a week from therapists<br>G2 (45): SFT: 50-minute sessions twice a week from trained therapists<br>Duration: 3 years | Inclusion: Ages 18–60 years; DSM-IV BPD diagnosis; BPDSI-IV score >20<br>Exclusion: Psychotic disorders, bipolar disorder, DID, ASPD, or ADHD; addiction requiring clinical detoxification; psychiatric disorders secondary to medical conditions | Mean age, <i>years</i> ( <i>SD</i> ):<br>G1: 29.5 (6.5)<br>G2: 31.7 (8.9)<br>Female: 93%<br>Race/ethnicity: NR | Primary outcome: BPDSI-IV at 36 months<br>G2 significantly more effective than G1 to improve BPDSI-IV at 36 months (16.24 vs. 21.87, <i>P</i> =0.005, RR=2.33, 95% CI 1.24–4.37)<br>Incidence of AEs: NR<br>Withdrawal due to AEs: NR<br>Attrition: 39%<br>Differential attrition:<br>G1: 51% (22/43)<br>G2: 27% (12/45) | High         |

ADHD=attention-deficit/hyperactivity disorder; AE=adverse event; ASPD=antisocial personality disorder; BPD=borderline personality disorder; BPDSI-IV=Borderline Personality Disorder Severity Index-IV; CI=confidence interval; DID=dissociative identity disorder; DSM-IV=*Diagnostic and Statistical Manual of Mental Disorders*, 4th Edition; G1=Group 1; G2=Group 2; *N*=sample size; NR=not reported; RCT=randomized controlled trial; RR=risk ratio; SD=standard deviation; SFT=schema-focused therapy; TFP=transference-focused psychotherapy.

## Special Populations

## Borderline Personality Disorder and Substance Use Disorder: Comprehensive Validation Therapy Plus 12-Step vs. Dialectical Behavior Therapy

TABLE D-28. Study characteristics and main results of CVT+12S compared with DBT in patients with BPD and SUD

| Author (year) and/or trial name | Study characteristics                                                                                         | Participants, N; interventions; duration                                                                                                                                                                                                                                                                               | Study population, including main inclusion and exclusion criteria                                                                                                                                                                                                                                                                                                                           | Sample demographics                                                                                                                                     | Primary outcome; main results; attrition                                                                                                                                                                                                                                                                                                                                                                                                                                                                                                                            | Risk of bias |
|---------------------------------|---------------------------------------------------------------------------------------------------------------|------------------------------------------------------------------------------------------------------------------------------------------------------------------------------------------------------------------------------------------------------------------------------------------------------------------------|---------------------------------------------------------------------------------------------------------------------------------------------------------------------------------------------------------------------------------------------------------------------------------------------------------------------------------------------------------------------------------------------|---------------------------------------------------------------------------------------------------------------------------------------------------------|---------------------------------------------------------------------------------------------------------------------------------------------------------------------------------------------------------------------------------------------------------------------------------------------------------------------------------------------------------------------------------------------------------------------------------------------------------------------------------------------------------------------------------------------------------------------|--------------|
| Linehan et al. (2002)           | Design: RCT<br>Setting: Outpatient, single center<br>Country: United States<br>Funding: Government, NIDA, NIH | N=24<br>G1 (12): Weekly individual CVT+12S; weekly "12-and-12" NA group, case management, and phone consultation as needed and opiate agonist therapy<br>G2 (12): Weekly DBT individual and group skills training, case management, and phone consultation as needed and opiate agonist therapy<br>Duration: 12 months | Inclusion: Female; ages 18–45 years; BPD diagnosis according to PDE and SCID-II; current opiate dependence according to SCID-I; no indication of treatment coercion (e.g., court-ordered/agency-ordered to retain housing)<br>Exclusion: Did not meet criteria for BPD; met criteria for bipolar mood disorder; currently pregnant; did not complete pretreatment and/or medical evaluation | Mean age, years (SD): 36 (7.3)<br>Female: 100%<br>Race/ethnicity:<br>Caucasian: 66%<br>African American: 26%<br>Other (Asian and Hispanic American): 4% | Primary outcome: Percentage of opiate-positive urine specimens<br>At end of 12-month treatment, G2 significantly lower percentage of opiate-positive urine specimens than G1 ( $t=2.32$ , $P<0.02$ ); no significant differences at 12 months for any other outcomes<br>No significant differences between G1 and G2 for percentage of opiate-positive urine specimens or parasuicidal behavior and on BSI or GAS at 16 months<br>Incidence of AEs: NR<br>Withdrawal due to AEs: NR<br>Attrition: 21%<br>Differential attrition:<br>G1: 0% (0/12)<br>G2: 42% (5/12) | Moderate     |

AE=adverse event; BPD=borderline personality disorder; BSI=Brief Symptom Inventory; CVT+12S=comprehensive validation therapy plus 12-step; DBT=dialectical behavior therapy; G1=Group 1; G2=Group 2; GAS=Global Assessment Scale; N=sample size; NA=Narcotics Anonymous; NIDA=National Institute on Drug Abuse; NIH=National Institute of Health; NR=not reported; PDE=Personality Disorders Exam; RCT=randomized controlled trial; SCID-I=Structured Clinical Interview for DSM-IV Axis I Disorders; SCID-II=Structured Clinical Interview for DSM-IV Axis II Disorders; SD=standard deviation; SUD=substance use disorder.

## Borderline Personality Disorder and Substance Use Disorder: Substance Use Disorder Treatment vs. Mentalization-Based Treatment Plus Substance Use Disorder Treatment

**TABLE D-29. Study characteristics and main results of SUD treatment compared with MBT plus SUD treatment in patients with BPD and SUD**

| Author (year) and/or trial name | Study characteristics                                                                   | Participants, <i>N</i> ; interventions; duration                                                                                                 | Study population, including main inclusion and exclusion criteria                                                                                                                                                                                                                                                                                    | Sample demographics                                                                     | Primary outcome; main results; attrition                                                                                                                                                                                                                                   | Risk of bias |
|---------------------------------|-----------------------------------------------------------------------------------------|--------------------------------------------------------------------------------------------------------------------------------------------------|------------------------------------------------------------------------------------------------------------------------------------------------------------------------------------------------------------------------------------------------------------------------------------------------------------------------------------------------------|-----------------------------------------------------------------------------------------|----------------------------------------------------------------------------------------------------------------------------------------------------------------------------------------------------------------------------------------------------------------------------|--------------|
| Philips et al. (2018)           | Design: RCT<br>Setting: Outpatient, multicenter<br>Country: Sweden<br>Funding: Multiple | <i>N</i> =46<br>G1 (22): Standard SUD treatment<br>G2 (24): Standard SUD treatment plus combined individual and group MBT<br>Duration: 18 months | Inclusion: Males and females; ages 18–65 years; DSM-IV BPD and SUD diagnoses; currently undergoing treatment at SUD treatment clinic<br>Exclusion: Schizophrenia, schizoaffective disorder, bipolar disorder type I, cognitive impairment, ASD, or psychopathy; participation in psychotherapy outside of study; inability to communicate in Swedish | Mean age, <i>years</i> ( <i>SD</i> ): 36.7 (9.6)<br>Female: 80.4%<br>Race/ethnicity: NR | Primary outcome: BPDSI-IV, deliberate self-harm, suicide attempts, IIP, reflective functioning scale, GSI, at 18 months<br>No significant difference between groups on any outcome measure at 18 months<br>Attrition: 48%<br>Differential attrition: <10 percentage points | High         |

ASD=autism spectrum disorder; BPD=borderline personality disorder; BPDSI-IV=Borderline Personality Disorder Severity Index-IV; DSM-IV=*Diagnostic and Statistical Manual of Mental Disorders*, 4th Edition; G1=Group 1; G2=Group 2; GSI=Global Severity Index; IIP=Inventory of Interpersonal Problems; MBT=mentalization-based treatment; *N*=sample size; NR=not reported; RCT=randomized clinical trial; SD=standard deviation; SUD=substance use disorder.

## Borderline Personality Disorder and Alcohol Use Disorder: Dynamic Deconstructive Psychotherapy vs. Treatment as Usual in the Community

**TABLE D-30. Study characteristics and main results of DDP compared with TAU in the community in patients with BPD and AUD**

| Author (year) and/or trial name   | Study characteristics                                                                                     | Participants, <i>N</i> ; interventions; duration                                                                                                                                                                                                                                                                   | Study population, including main inclusion and exclusion criteria                                                                                                                                                                                                                                   | Sample demographics                                                                                                                                                                 | Primary outcome; main results; attrition                                                                                                                                                                                                                                                                                                                                                                                                             | Risk of bias |
|-----------------------------------|-----------------------------------------------------------------------------------------------------------|--------------------------------------------------------------------------------------------------------------------------------------------------------------------------------------------------------------------------------------------------------------------------------------------------------------------|-----------------------------------------------------------------------------------------------------------------------------------------------------------------------------------------------------------------------------------------------------------------------------------------------------|-------------------------------------------------------------------------------------------------------------------------------------------------------------------------------------|------------------------------------------------------------------------------------------------------------------------------------------------------------------------------------------------------------------------------------------------------------------------------------------------------------------------------------------------------------------------------------------------------------------------------------------------------|--------------|
| Gregory et al. (2008, 2009, 2010) | Design: RCT<br>Setting: Outpatient, single center<br>Country: United States<br>Funding: Other, university | <i>N</i> =30<br>G1 (15): TAU: combination of individual psychotherapy, medication management, alcohol and drug counseling, professional and self-help groups, and/or case management<br>G2 (15): DDP: weekly, 1-hour sessions administered by the PI or by one of five psychiatry residents<br>Duration: 12 months | Inclusion: Ages 18–45 years; DSM-IV BPD diagnosis; active alcohol abuse or dependence<br>Exclusion: Schizophrenia or schizoaffective disorder, intellectual disability, or neurological condition that may produce secondary psychiatric symptoms (e.g., stroke, MS, partial complex seizures, TBI) | Mean age, <i>years</i> ( <i>SD</i> ): 29 (7.7)<br>Female: 80%<br>Race/ethnicity:<br>White: 90%<br>Black: 3.3%<br>Hispanic or Latino: 3.3%<br>American Indian or Alaska Native: 3.3% | Primary outcome: Parasuicide behavior, alcohol misuse, and institutional care at 12 months<br>No significant difference between G2 and G1 for parasuicide behavior, alcohol misuse, and dissociation at 12 months<br>G2 significant improvements in depression (21.0 vs. 25.9, $P<0.05$ ) and in core symptoms of BPD (BEST) (33.6 vs. 38.4, $P<0.05$ ) at 12 months<br>Attrition at 12 months: 37%<br>Differential attrition: <10 percentage points | High         |

AUD=alcohol use disorder; BEST=Borderline Evaluation of Severity Over Time; BPD=borderline personality disorder; DDP=dynamic deconstructive psychotherapy; DSM-IV=*Diagnostic and Statistical Manual of Mental Disorders*, 4th Edition; G1=Group 1; G2=Group 2; MS=multiple sclerosis; *N*=sample size; PI=principal investigator; RCT=randomized clinical trial; SD=standard deviation; TAU=treatment as usual; TBI=traumatic brain injury.

## Borderline Personality Disorder and Eating Disorder: Cognitive-Behavioral Therapy vs. Dialectical Behavior Therapy

**TABLE D-31. Study characteristics and main results of CBT compared with DBT in patients with BPD and eating disorder**

| Author (year) and/or trial name | Study characteristics                                                                                                                | Participants, <i>N</i> ; interventions; duration                                                                                                                                                                              | Study population, including main inclusion and exclusion criteria                                                                                                                                                      | Sample demographics                                                                  | Primary outcome; main results; attrition                                                                                                                                                                                                                                                                                                                                                                                                                                                                                      | Risk of bias |
|---------------------------------|--------------------------------------------------------------------------------------------------------------------------------------|-------------------------------------------------------------------------------------------------------------------------------------------------------------------------------------------------------------------------------|------------------------------------------------------------------------------------------------------------------------------------------------------------------------------------------------------------------------|--------------------------------------------------------------------------------------|-------------------------------------------------------------------------------------------------------------------------------------------------------------------------------------------------------------------------------------------------------------------------------------------------------------------------------------------------------------------------------------------------------------------------------------------------------------------------------------------------------------------------------|--------------|
| Navarro-Haro et al. (2018)      | Design: Nonrandomized controlled trial<br>Setting: Outpatient, multicenter<br>Country: Spain<br>Funding: Government, national agency | <i>N</i> =118<br>G1 (47): Weekly individual CBT, weekly group session, and pharmacological treatment<br>G2 (71): Weekly individual DBT, weekly DBT group skills training, and pharmacological treatment<br>Duration: 6 months | Inclusion: Age ≥18 years; DSM-IV BPD and eating disorder diagnoses<br>Exclusion: Psychotic disorder and/or bipolar I disorder; alcohol or other SUD; organic disease that could interfere with psychological treatment | Mean age, <i>years</i> ( <i>SD</i> ): 27 (8.8)<br>Female: 100%<br>Race/ethnicity: NR | Primary outcome: Suicide attempt frequency, NSSI at 6 months<br>G2 significantly more improved on BDI than G1 (23.9 vs. 29.8, <i>P</i> =0.02) at 6 months<br>No significant differences between groups for suicide attempts, NSSI, or on GAF after 6 months; no significant differences between groups for depression, emotional regulation, or resilience at 6 years<br>Incidence of AEs: NR<br>Withdrawal due to AEs: NR<br>Attrition: 8% at 6 months and 41.5% at 6 years<br>Differential attrition: ≤10 percentage points | Moderate     |

AE=adverse event; BDI=Beck Depression Inventory; BPD=borderline personality disorder; CBT=cognitive-behavioral therapy; DBT= dialectical behavioral therapy; DSM-IV = *Diagnostic and Statistical Manual of Mental Disorders*, 4th Edition; G1=Group 1; G2=Group 2; GAF=Global Assessment of Functioning; *N*=sample size; NR=not reported; NSSI=nonsuicidal self-injury; SD=standard deviation; SUD=substance use disorder.

## Borderline Personality Disorder and Eating Disorder: Specialist Supportive Clinical Management vs. Modified Mentalization-Based Treatment

**TABLE D-32. Study characteristics and main results of SSCM compared with modified MBT in patients with BPD and eating disorder**

| Author (year) and/or trial name   | Study characteristics                                                                                   | Participants, <i>N</i> ; interventions; duration                                                                                                                                           | Study population, including main inclusion and exclusion criteria                                                                                                                                                                                                                                                                                                                                                                                                                 | Sample demographics                                                                         | Primary outcome; main results; attrition                                                                                                                                                                                                                       | Risk of bias |
|-----------------------------------|---------------------------------------------------------------------------------------------------------|--------------------------------------------------------------------------------------------------------------------------------------------------------------------------------------------|-----------------------------------------------------------------------------------------------------------------------------------------------------------------------------------------------------------------------------------------------------------------------------------------------------------------------------------------------------------------------------------------------------------------------------------------------------------------------------------|---------------------------------------------------------------------------------------------|----------------------------------------------------------------------------------------------------------------------------------------------------------------------------------------------------------------------------------------------------------------|--------------|
| Robinson et al. (2016); NOURISHED | Design: RCT<br>Setting: Outpatient, multicenter<br>Country: United Kingdom<br>Funding: Government, NIHR | <i>N</i> =68<br>G1 (34): SSCM: one session every 1–4 weeks for 20–26 sessions over 1 year<br>G2 (34): MBT: one individual and one group session per week for 1 year<br>Duration: 12 months | Inclusion: Age ≥18 years; DSM-IV eating disorder and BPD diagnoses or “BPD symptoms” from DSM-IV (impulsivity in two or more potentially self-damaging areas, recurrent suicidal or self-mutilating behavior)<br>Exclusion: Current psychosis; current inpatient or day-patient (3+ days/week); currently in individual or group psychological therapy; received MBT <6 months prior to randomization; organic brain disease leading to significant cognitive impairment; BMI <15 | Mean age, <i>years</i> ( <i>SD</i> ): 31 (9.9)<br>Female: 93%<br>Race/ethnicity: White: 84% | Primary outcome: EDE global score at 18 months<br>No significant differences between G1 and G2 on ZAN-BPD at 18 months<br>Incidence of AEs: NR<br>Withdrawal due to AEs: NR<br>Attrition: 78%<br>Differential attrition:<br>G1: 85% (29/34)<br>G2: 71% (24/34) | High         |

AE=adverse event; BMI=body mass index; BPD=borderline personality disorder; DSM-IV=*Diagnostic and Statistical Manual of Mental Disorders*, 4th Edition; EDE=Eating Disorder Examination; G1=Group 1; G2=Group 2; MBT=mentalization-based treatment; *N*=sample size; NIHR=National Institute for Health Research; NOURISHED=Nice Outcomes for Referrals with Impulsivity, Self Harm and Eating Disorders; NR=not reported; RCT=randomized clinical trial; SD=standard deviation; SSCM=specialist supportive clinical management; ZAN-BPD=Zanarini Rating Scale for Borderline Personality Disorder.

## Borderline Personality Disorder and Major Depressive Disorder: Cognitive Therapy Plus Fluoxetine vs. Interpersonal Therapy Plus Fluoxetine

**TABLE D-33. Study characteristics and main results of CT plus fluoxetine compared with IPT plus fluoxetine in patients with BPD and MDD**

| Author (year) and/or trial name | Study characteristics                                                                | Participants, <i>N</i> ; interventions; duration                                                                | Study population, including main inclusion and exclusion criteria                                                                                                                                                                                                                                                      | Sample demographics                                                                                                      | Primary outcome; main results; attrition                                                                                                                                                                                                                                             | Risk of bias |
|---------------------------------|--------------------------------------------------------------------------------------|-----------------------------------------------------------------------------------------------------------------|------------------------------------------------------------------------------------------------------------------------------------------------------------------------------------------------------------------------------------------------------------------------------------------------------------------------|--------------------------------------------------------------------------------------------------------------------------|--------------------------------------------------------------------------------------------------------------------------------------------------------------------------------------------------------------------------------------------------------------------------------------|--------------|
| Bellino et al. (2007)           | Design: RCT<br>Setting: Outpatient, single center<br>Country: Italy<br>Funding: None | <i>N</i> =32<br>G1 (16): Weekly CT plus fluoxetine<br>G2 (16): Weekly IPT plus fluoxetine<br>Duration: 24 weeks | Inclusion: Met DSM-IV-TR criteria for BPD and an MDE<br>Exclusion: Lifetime diagnosis of delirium, dementia, amnestic or other cognitive disorders, schizophrenia or other psychotic disorders, or bipolar disorder; current SUD; treated with psychotropic medication or psychotherapy during 2 months prior to study | Based on report among completers:<br>Mean age, <i>years</i> ( <i>SD</i> ): 31 (5.8)<br>Female: 73%<br>Race/ethnicity: NR | Primary outcome: Ham-D at 24 weeks<br>No significant differences between G1 and G2 on Ham-D, Ham-A, BDI-II, CGI-S, SOFAS, or SAT-P at 24 weeks<br>Incidence of AEs: NR<br>Withdrawal due to AEs: NR<br>Attrition: 19%<br>Differential attrition:<br>G1: 25% (4/16)<br>G2: 13% (2/16) | Moderate     |

AE=adverse event; BDI-II=Beck Depression Inventory-II; BPD=borderline personality disorder; CGI-S=Clinical Global Impression-Severity; CT=cognitive therapy; DSM-IV-TR=*Diagnostic and Statistical Manual of Mental Disorders*, 4th Edition, Text Revision; G1=Group 1; G2=Group 2; Ham-A=Hamilton Rating Scale for Anxiety; Ham-D=Hamilton Rating Scale for Depression; IPT=interpersonal psychotherapy; MDD=major depressive disorder; MDE=major depressive episode; *N*=sample size; NR=not reported; RCT=randomized clinical trial; SAT-P=Satisfaction Profile; SD=standard deviation; SOFAS=Social Occupational Functioning Assessment Scale; SUD=substance use disorder.

## Borderline Personality Disorder and Major Depressive Disorder: Interpersonal Psychotherapy Plus Fluoxetine vs. Clinical Management Plus Fluoxetine

**TABLE D-34. Study characteristics and main results of IPT plus fluoxetine compared with clinical management plus fluoxetine in patients with BPD and MDD**

| Author (year) and/or trial name | Study characteristics                                                                | Participants, <i>N</i> ; interventions; duration                                                                                                                                                                                                                                                                                               | Study population, including main inclusion and exclusion criteria                                                                                                                                                                                                                                                                                                                           | Sample demographics                                                                                                    | Primary outcome; main results; attrition                                                                                                                                                                                                                                                                                                                              | Risk of bias |
|---------------------------------|--------------------------------------------------------------------------------------|------------------------------------------------------------------------------------------------------------------------------------------------------------------------------------------------------------------------------------------------------------------------------------------------------------------------------------------------|---------------------------------------------------------------------------------------------------------------------------------------------------------------------------------------------------------------------------------------------------------------------------------------------------------------------------------------------------------------------------------------------|------------------------------------------------------------------------------------------------------------------------|-----------------------------------------------------------------------------------------------------------------------------------------------------------------------------------------------------------------------------------------------------------------------------------------------------------------------------------------------------------------------|--------------|
| Bellino et al. (2006)           | Design: RCT<br>Setting: Outpatient, single center<br>Country: Italy<br>Funding: None | <i>N</i> =39<br>G1 (19): Clinical management plus fluoxetine 20–40 mg/day; initial fixed 20 mg/day with opportunity to increase to 40 mg/day beginning week 2<br>G2 (20): IPT in weekly 1-hour sessions plus fluoxetine 20–40 mg/day; initial fixed 20 mg/day with opportunity to increase to 40 mg/day beginning week 2<br>Duration: 24 weeks | Inclusion: DSM-IV BPD diagnosis; met criteria for MDE<br>Exclusion: Lifetime diagnosis of delirium, dementia, amnestic or other cognitive disorders, or schizophrenia or other psychotic disorders; MDE as an expression of bipolar disorder; current SUD; treatment with psychotropic medication or psychotherapy during 2 months prior to study; females not using adequate birth control | Mean age, years ( <i>SD</i> ): 26 (3.7)<br>Female: 60% (reported as ratio of males:females= 3:5)<br>Race/ethnicity: NR | Primary outcome: NR<br>G2 significantly more effective than G1 for improving symptoms of depression (measured by Ham-D [9.1 vs. 12, <i>P</i> =0.005])<br>No significant differences between G2 and G1 in anxiety on clinical global impressions (measured by CGI-S) or anxiety (measured by Ham-A)<br>Attrition: 17.9% (7/39)<br>G1: 20.0% (4/20)<br>G2: 15.8% (3/19) | Moderate     |

BPD=borderline personality disorder; CGI-S=Clinical Global Impression-Severity; DSM-IV=*Diagnostic and Statistical Manual of Mental Disorders*, 4th Edition; G1=Group 1; G2=Group 2; Ham-A=Hamilton Rating Scale for Anxiety; Ham-D=Hamilton Rating Scale for Depression; IPT=interpersonal psychotherapy; MDD=major depressive disorder; MDE=major depressive episode; *N*=sample size; NR=not reported; RCT=randomized clinical trial; SD=standard deviation; SUD=substance use disorder.



## Borderline Personality Disorder and Posttraumatic Stress Disorder: Dialectical Behavior Therapy Alone vs. Dialectical Behavior Therapy Plus Dialectical Behavior Therapy-Prolonged Exposure

**TABLE D–35. Study characteristics and main results of DBT alone compared with DBT plus DBT-PE in patients with BPD and PTSD**

| Author (year) and/or trial name | Study characteristics                                                                                    | Participants, <i>N</i> ; interventions; duration                                                                                                                                                                                                                                          | Study population, including main inclusion and exclusion criteria                                                                                                                                                                                                                                                                                                                                                                                    | Sample demographics                                                                                                                   | Primary outcome; main results; attrition                                                                                                                                                                                                                                                                                                                        | Risk of bias |
|---------------------------------|----------------------------------------------------------------------------------------------------------|-------------------------------------------------------------------------------------------------------------------------------------------------------------------------------------------------------------------------------------------------------------------------------------------|------------------------------------------------------------------------------------------------------------------------------------------------------------------------------------------------------------------------------------------------------------------------------------------------------------------------------------------------------------------------------------------------------------------------------------------------------|---------------------------------------------------------------------------------------------------------------------------------------|-----------------------------------------------------------------------------------------------------------------------------------------------------------------------------------------------------------------------------------------------------------------------------------------------------------------------------------------------------------------|--------------|
| Harned et al. (2014, 2018)      | Design: RCT<br>Setting: Outpatient, single center<br>Country: United States<br>Funding: Government, NIMH | <i>N</i> =26<br>G1 (9): DBT: weekly individual therapy, group training, and therapist consultation team meeting and as-needed phone consultation<br>G2 (17): DBT-PE: weekly PE protocol and DBT as well as group DBT skills training and as-needed phone consultation<br>Duration: 1 year | Inclusion: Female; ages 18–60 years; DSM-IV BPD and PTSD diagnoses; can remember at least some part of index trauma; recent and recurrent intentional self-injury; lives within commuting distance of clinic<br>Exclusion: Met criteria for psychotic disorder, bipolar disorder, or intellectual disability; legally mandated to treatment; required primary treatment for another debilitating condition (i.e., life-threatening anorexia nervosa) | Mean age, <i>years</i> ( <i>SD</i> ): 33 (12)<br>Female: 100%<br>Race/ethnicity:<br>White: 81%<br>Biracial: 15%<br>Asian-American: 4% | Primary outcome: PTSD (PSS-I), intentional self-injury (SASII) at 15 months<br>Numerically greater improvements in suicide attempts and on NSSI, PSS-I, SASII, Ham-A, Ham-D, and GSI across both groups; no statistical tests performed<br>Incidence of AEs: NR<br>Withdrawal due to AEs: NR<br>Attrition: 42%<br>Differential attrition: ≤10 percentage points | High         |

AE=adverse event; BPD=borderline personality disorder; DBT=dialectical behavior therapy; DSM-IV=*Diagnostic and Statistical Manual of Mental Disorders*, 4th Edition; G1=Group 1; G2=Group 2; GSI=Global Severity Index; Ham-A=Hamilton Rating Scale for Anxiety; Ham-D=Hamilton Rating Scale for Depression; *N*=sample size; NIMH=National Institute of Mental Health; NR=not reported; NSSI=non-suicidal self-injury; PE=prolonged exposure; PSS-I=PTSD Symptom Scale–Interview; PTSD=posttraumatic stress disorder; RCT=randomized clinical trial; SASII=Suicide Attempt Self-Injury Interview; SD=standard deviation.

## Adolescents With Borderline Personality Disorder: Manualized Good Clinical Care vs. Cognitive Analytic Therapy

**TABLE D-36. Study characteristics and main results of manualized good clinical care compared with CAT in adolescents with BPD**

| Author (year) and/or trial name | Study characteristics                                                                                                            | Participants, <i>N</i> ; interventions; duration                                                                    | Study population, including main inclusion and exclusion criteria                                                                                                                                                                                                                                                                                                                                                                                                                                                                 | Sample demographics                              | Primary outcome; main results; attrition                                                                                                                                                                                                                                                                                               | Risk of bias |
|---------------------------------|----------------------------------------------------------------------------------------------------------------------------------|---------------------------------------------------------------------------------------------------------------------|-----------------------------------------------------------------------------------------------------------------------------------------------------------------------------------------------------------------------------------------------------------------------------------------------------------------------------------------------------------------------------------------------------------------------------------------------------------------------------------------------------------------------------------|--------------------------------------------------|----------------------------------------------------------------------------------------------------------------------------------------------------------------------------------------------------------------------------------------------------------------------------------------------------------------------------------------|--------------|
| Chanen et al. (2008)            | Design: RCT<br>Setting: Outpatient, single center<br>Country: Australia<br>Funding: Government, NHMRC other, VicHealth, Colonial | <i>N</i> =86<br>G1 (42): Weekly group standardized good clinical care<br>G2 (44): Weekly CAT<br>Duration: 24 months | Inclusion: Ages 15–18 years; met two to nine DSM-IV criteria for BPD; any personality disorder or disruptive behavior disorder symptom; low socioeconomic status; depressive symptoms; history of abuse or neglect<br>Exclusion: Learning disability, psychiatric disorder, pervasive developmental disorder, or severe primary Axis I disorder; more than nine sessions of specialist mental health treatment in previous 12 months; sustained psychosis and met criteria for Early Psychosis Prevention and Intervention Centre | Mean age: NR<br>Female: NR<br>Race/ethnicity: NR | Primary outcome: Psychopathology, parasuicidal behavior, global functioning at 24 months<br>No significant differences between G1 and G2 for parasuicidal behavior or on BPD Total Score and SOFAS at 24 months<br>Incidence of AEs: NR<br>Withdrawal due to AEs: NR<br>Attrition: 9%<br>Differential attrition: ≤10 percentage points | Moderate     |

AE=adverse event; BPD=borderline personality disorder; CAT=cognitive analytic therapy; DSM-IV=*Diagnostic and Statistical Manual of Mental Disorders*, 4th Edition; G1=Group 1; G2=Group 2; *N*=sample size; NHMRC=National Health and Medical Research Council; NR=not reported; RCT=randomized clinical trial; SOFAS=Social Occupational Functioning Assessment Scale.

## Adolescents with Borderline Personality Disorder and Substance Use Disorder: Individual Drug Counseling vs. Integrative Borderline Personality Disorder-Oriented Adolescent Family Therapy

**TABLE D-37. Study characteristics and main results of individual drug counseling compared with I-BAFT in adolescents with BPD and SUD**

| Author (year) and/or trial name | Study characteristics                                                                              | Participants, <i>N</i> ; interventions; duration                                                                                                                                                                                             | Study population, including main inclusion and exclusion criteria                    | Sample demographics                                                                                                      | Primary outcome; main results; attrition                                                                                                                                                                                                                                                       | Risk of bias |
|---------------------------------|----------------------------------------------------------------------------------------------------|----------------------------------------------------------------------------------------------------------------------------------------------------------------------------------------------------------------------------------------------|--------------------------------------------------------------------------------------|--------------------------------------------------------------------------------------------------------------------------|------------------------------------------------------------------------------------------------------------------------------------------------------------------------------------------------------------------------------------------------------------------------------------------------|--------------|
| Santisteban et al. (2015)       | Design: RCT<br>Setting: Outpatient, single center<br>Country: United States<br>Funding: Government | <i>N</i> =40<br>G1 (20): Twice-weekly individual drug counseling and monthly family meeting with caregivers<br>G2 (20): Twice-weekly I-BAFT, including family and individual therapy and skills-building interventions<br>Duration: 7 months | Inclusion: Ages 14–17 years; DSM-IV BPD and substance use diagnoses<br>Exclusion: NR | Mean age, <i>years</i> ( <i>SD</i> ):<br>G1: 16 (0.8)<br>G2: 16 (0.8)<br>Female: 38%<br>Race/ethnicity:<br>Hispanic: 85% | Primary outcome: Substance use, BPD behaviors at 12 months<br>No significant differences between G1 and G2 in substance use or BPD behavior at 12 months<br>Incidence of AEs: NR<br>Withdrawal due to AEs: NR<br>Attrition: 33%<br>Differential attrition:<br>G1: 40% (8/20)<br>G2: 25% (5/20) | High         |

AE=adverse event; BPD=borderline personality disorder; DSM-IV=*Diagnostic and Statistical Manual of Mental Disorders*, 4th Edition; G1=Group 1; G2=Group 2; I-BAFT=integrative borderline personality disorder-oriented adolescent family therapy; *N*=sample size; NR=not reported; RCT=randomized clinical trial; SD=standard deviation; SUD=substance use disorder.

# Pharmacotherapy

## Second-Generation Antipsychotics vs. Placebo

**TABLE D-38. Study characteristics and main results of SGAs compared with placebo**

| Author (year) and/or trial name | Study characteristics                                                                                             | Participants, <i>N</i> ; interventions; duration                                                                                    | Study population, including main inclusion and exclusion criteria                                                                                                                                                                                                                                                                        | Sample demographics                                                                                                                                              | Primary outcome; main results; attrition                                                                                                                                                                                                                                                                                                                                                                                                                                                                                               | Risk of bias |
|---------------------------------|-------------------------------------------------------------------------------------------------------------------|-------------------------------------------------------------------------------------------------------------------------------------|------------------------------------------------------------------------------------------------------------------------------------------------------------------------------------------------------------------------------------------------------------------------------------------------------------------------------------------|------------------------------------------------------------------------------------------------------------------------------------------------------------------|----------------------------------------------------------------------------------------------------------------------------------------------------------------------------------------------------------------------------------------------------------------------------------------------------------------------------------------------------------------------------------------------------------------------------------------------------------------------------------------------------------------------------------------|--------------|
| Black et al. (2014)             | Design: Double-blinded RCT<br>Setting: Outpatient, multicenter<br>Country: United States<br>Funding: Astra-Zeneca | <i>N</i> =95<br>G1 (29): Placebo<br>G2 (33): Quetiapine ER (150 mg/day)<br>G3 (33): Quetiapine ER (300 mg/day)<br>Duration: 8 weeks | Inclusion: Males and females; ages 18–45 years; DSM-IV criteria for personality disorders; score $\geq 9$ on ZAN-BPD<br>Exclusion: History of psychotic disorder, neurological condition, or cognitive impairment; current SUD or abuse; medically unstable; history of lack of response to SGA; pregnant or lactating; acutely suicidal | Mean age, <i>years</i> ( <i>SD</i> ):<br>G1: 30 (8.8)<br>G2: 28 (8.0)<br>G3: 30 (8.1)<br>Female: 30%<br>Race/ethnicity:<br>European-Caucasian: 78%<br>Other: 21% | Primary outcome: ZAN-BPD at 8 weeks<br>G2 (but not G3) significantly more effective than G1 on ZAN-BPD ( $P=0.03$ )<br>G3 (but not G2) significantly more effective on SCL-90 than G1 ( $P=0.03$ )<br>G2 and G3 significantly more effective on MOAS ( $P=0.01$ )<br>No significant differences on BIS, MADRS, and SDS<br>Incidence of AEs:<br>G1: 86% (25/29)<br>G2: 88% (29/33)<br>G3: 91% (30/33)<br>Withdrawal due to AEs: NR<br>Attrition: 33%<br>Differential attrition:<br>G1: 21% (6/29)<br>G2: 33% (11/33)<br>G3: 42% (14/33) | Moderate     |

**TABLE D–38. Study characteristics and main results of SGAs compared with placebo (continued)**

| Author (year) and/or trial name | Study characteristics                                                                                            | Participants, <i>N</i> ; interventions; duration                                              | Study population, including main inclusion and exclusion criteria                                                                                                                                                                                                                                                                             | Sample demographics                                                                                                                                            | Primary outcome; main results; attrition                                                                                                                                                                                                                                                                                                                         | Risk of bias |
|---------------------------------|------------------------------------------------------------------------------------------------------------------|-----------------------------------------------------------------------------------------------|-----------------------------------------------------------------------------------------------------------------------------------------------------------------------------------------------------------------------------------------------------------------------------------------------------------------------------------------------|----------------------------------------------------------------------------------------------------------------------------------------------------------------|------------------------------------------------------------------------------------------------------------------------------------------------------------------------------------------------------------------------------------------------------------------------------------------------------------------------------------------------------------------|--------------|
| Bogenschutz and Nurnberg (2004) | Design: Double-blinded RCT<br>Setting: Outpatient, single center<br>Country: United States<br>Funding: Eli Lilly | <i>N</i> =40<br>G1 (20): Placebo<br>G2 (20): Olanzapine (2.5–20 mg/day)<br>Duration: 12 weeks | Inclusion: Ages 18–60 years; DSM-IV BPD diagnosis; medically stable<br>Exclusion: Other psychiatric disorders, SUD, or actively suicidal                                                                                                                                                                                                      | Mean age, <i>years</i> ( <i>SD</i> ): 32 (10.3)<br>Female: 63%<br>Race/ethnicity:<br>White: 58%<br>Hispanic: 25%<br>Asian/Pacific Islander: 8%<br>Other: 10%   | Primary outcome: CGI-BPD at 12 weeks<br>Significantly greater improvement of G2 than G1 on CGI-BPD ( <i>P</i> =0.03)<br>No significant differences on SCL-90, Ham-A, Ham-D, MOAS, and GAF<br>Incidence of AEs: NR<br>Withdrawal due to AEs:<br>G1: 0% (0/20)<br>G2: 20% (4/20)<br>Attrition: 43%<br>Differential attrition:<br>G1: 35% (7/20)<br>G2: 50% (10/20) | High         |
| Linehan et al. (2008)           | Design: Double-blinded RCT<br>Setting: University hospital<br>Country: United States<br>Funding: Eli Lilly       | <i>N</i> =24<br>G1 (12): Placebo<br>G2 (12): Olanzapine (5 mg/day)<br>Duration: 6 months      | Inclusion: Females; ages 18–60 years; met SCID-II and Borderline Personality Disorder Examination criteria for BPD; MOAS irritability subscale score ≥6<br>Exclusion: Schizophrenia, bipolar I disorder, schizoaffective disorder, MDD with psychotic features or other psychotic disorder, intellectual disability, seizure disorder, or SUD | Mean age, <i>years</i> ( <i>SD</i> ): 37 (9.0)<br>Female: 100%<br>Race/ethnicity:<br>White: 79%<br>Black: 4%<br>Native American: 4%<br>Latino: 4%<br>Other: 8% | Primary outcome: NR<br>No significant differences between G1 and G2 on MOAS and Ham-D and for self-inflicted injury<br>Incidence of AEs: NR<br>Withdrawal due to AEs:<br>G1: 0% (0/12)<br>G2: 8% (1/12)<br>Attrition: 33%<br>Differential attrition: ≤10 percentage points                                                                                       | High         |

**TABLE D-38. Study characteristics and main results of SGAs compared with placebo (continued)**

| Author (year) and/or trial name | Study characteristics                                                                                                     | Participants, <i>N</i> ; interventions; duration                                                                   | Study population, including main inclusion and exclusion criteria                                                                                                                                                                                                                                                | Sample demographics                                                                                        | Primary outcome; main results; attrition                                                                                                                                                                                                                                                                                                                                                                                                                               | Risk of bias |
|---------------------------------|---------------------------------------------------------------------------------------------------------------------------|--------------------------------------------------------------------------------------------------------------------|------------------------------------------------------------------------------------------------------------------------------------------------------------------------------------------------------------------------------------------------------------------------------------------------------------------|------------------------------------------------------------------------------------------------------------|------------------------------------------------------------------------------------------------------------------------------------------------------------------------------------------------------------------------------------------------------------------------------------------------------------------------------------------------------------------------------------------------------------------------------------------------------------------------|--------------|
| Nickel et al. (2006, 2007)      | Design: Double-blinded RCT<br>Setting: University hospitals<br>Country: Austria, Germany<br>Funding: None                 | <i>N</i> =52<br>G1 (26): Placebo<br>G2 (26): Aripiprazole (15 mg/day)<br>Duration: 8 weeks<br>Follow up: 18 months | Inclusion: Males and females; age ≥16 years; DSM-IV BPD diagnosis<br>Exclusion: Schizophrenia; current use of other psychotropic medication; past termination of aripiprazole; current psychotherapy; pregnancy; suicidal ideation; severe somatic illness; alcohol or drug abuse                                | Mean age, <i>years</i> ( <i>SD</i> ):<br>G1: 21 (4.6)<br>G2: 22 (3.4)<br>Female: 83%<br>Race/ethnicity: NR | Primary outcome: SCL-90-R, Ham-D, Ham-A, STAXI at 8 weeks<br>G2 significantly greater improvements than G1 on SCL-90-R (15.0 vs. 4.9, <i>P</i> <0.001), Ham-D (6.4 vs. 2.1, <i>P</i> =0.002), Ham-A (7.0 vs. 3.3, <i>P</i> =0.007), and STAXI (13.6 vs. 5.7, <i>P</i> <0.001)<br>18-month follow-up for SCL-90-R: 17.9 vs. 1.4, <i>P</i> <0.01<br>Incidence of AEs: NR<br>Withdrawal due to AEs: NR<br>Attrition: 25%<br>Differential attrition: ≤10 percentage points | Moderate     |
| Pascual et al. (2008)           | Design: Double-blinded RCT<br>Setting: Outpatient, single center<br>Country: Spain<br>Funding: Pfizer, government funding | <i>N</i> =60<br>G1 (30): Placebo<br>G2 (30): Ziprasidone (40–200 mg/day)<br>Duration: 12 weeks                     | Inclusion: Males and females; ages 18–45 years; DSM-IV BPD diagnosis; current use of medically accepted contraception for females<br>Exclusion: Schizophrenia, drug-induced psychosis, organic brain syndrome, alcohol or other SUD, bipolar disorder, intellectual disability, or MDE in course; CGI-S score ≥4 | Mean age, <i>years</i> ( <i>SD</i> ):<br>G1: 29 (6.3)<br>G2: 29 (6.0)<br>Female: 82%<br>Race/ethnicity: NR | Primary outcome: CGI-BPD at 12 weeks<br>No significant differences on CGI-BPD, SCL-90, Ham-A, Ham-D, and in clinical psychotic symptoms<br>Incidence of AEs:<br>G1: 13% (4/30)<br>G2: 37% (11/30)<br>Withdrawal due to AEs:<br>G1: 0% (0/30)<br>G2: 30% (9/30)<br>Attrition: 52%<br>Differential attrition: ≤10 percentage points                                                                                                                                      | High         |

**TABLE D–38. Study characteristics and main results of SGAs compared with placebo (continued)**

| Author (year) and/or trial name | Study characteristics                                                                                          | Participants, <i>N</i> ; interventions; duration                                                              | Study population, including main inclusion and exclusion criteria                                                                                                                                                                                                                                                                                                           | Sample demographics                                                                                                   | Primary outcome; main results; attrition                                                                                                                                                                                                                                                                                                                                                                  | Risk of bias |
|---------------------------------|----------------------------------------------------------------------------------------------------------------|---------------------------------------------------------------------------------------------------------------|-----------------------------------------------------------------------------------------------------------------------------------------------------------------------------------------------------------------------------------------------------------------------------------------------------------------------------------------------------------------------------|-----------------------------------------------------------------------------------------------------------------------|-----------------------------------------------------------------------------------------------------------------------------------------------------------------------------------------------------------------------------------------------------------------------------------------------------------------------------------------------------------------------------------------------------------|--------------|
| Schulz et al. (2008)            | Design: Double-blinded RCT<br>Setting: Outpatient, multicenter<br>Country: Multi-country<br>Funding: Eli Lilly | <i>N</i> =314<br>G1 (159): Placebo<br>G2 (155): Olanzapine (2.5–20 mg/day)<br>Duration: 12 weeks              | Inclusion: Males and females; ages 18–65 years; DSM-IV BPD diagnosis; ZAN-BPD total score of 9<br>Exclusion: Schizophrenia, bipolar I disorder, bipolar II disorder, delusional disorder, MDD, SUD, PTSD, panic disorder, or OCD; BMI <17; use of antidepressants, mood stabilizer, or antipsychotic medication within 1 week of randomization; new psychotherapy treatment | Mean age, <i>years</i> ( <i>SD</i> ):<br>G1: 32 (9.6)<br>G2: 32 (9.5)<br>Female: 71%<br>Race/ethnicity:<br>White: 87% | Primary outcome: ZAN-BPD at 12 weeks<br>No significant differences on ZAN-BPD, SCL-90-R, and MADRS<br>SDS, GAF, MOAS: data NR<br>Incidence of AEs:<br>G1: 57% (90/159)<br>G2: 66% (102/155)<br>Withdrawal due to AEs:<br>G1: 11% (18/159)<br>G2: 11% (17/155)<br>Attrition: 43%<br>Differential attrition: ≤10 percentage points                                                                          | High         |
| Soler et al. (2005)             | Design: Double-blinded RCT<br>Setting: Outpatient, single center<br>Country: Spain<br>Funding: Eli Lilly       | <i>N</i> =60<br>G1 (30): DBT plus placebo<br>G2 (30): DBT plus olanzapine (5–20 mg/day)<br>Duration: 12 weeks | Inclusion: Females; ages 18–45 years; DSM-IV BPD diagnosis without comorbid, unstable Axis I disorder; CGI-S score ≥4; not receiving psychotherapy<br>Exclusion: NR                                                                                                                                                                                                         | Mean age, <i>years</i> ( <i>SD</i> ):<br>G1: 26 (5.4)<br>G2: 28 (6.3)<br>Female: 87%<br>Race/ethnicity: NR            | Primary outcome: NR<br>Significantly greater improvements for G2 than G1 on Ham-D (8.79 vs. 4.87, <i>P</i> =0.004) and frequency of aggressive behavior (data NR, <i>P</i> =0.03)<br>No significant differences on Ham-A, CGI-S, and episodes of suicide attempts and self-injury<br>Incidence of AEs: NR<br>Withdrawal due to AEs: NR<br>Attrition: 30%<br>Differential attrition: ≤10 percentage points | High         |

**TABLE D-38. Study characteristics and main results of SGAs compared with placebo (continued)**

| Author (year) and/or trial name | Study characteristics                                                                                             | Participants, <i>N</i> ; interventions; duration                                          | Study population, including main inclusion and exclusion criteria                                                                                                                              | Sample demographics                                                                                                                     | Primary outcome; main results; attrition                                                                                                                                                                                                                                                                                                                                     | Risk of bias |
|---------------------------------|-------------------------------------------------------------------------------------------------------------------|-------------------------------------------------------------------------------------------|------------------------------------------------------------------------------------------------------------------------------------------------------------------------------------------------|-----------------------------------------------------------------------------------------------------------------------------------------|------------------------------------------------------------------------------------------------------------------------------------------------------------------------------------------------------------------------------------------------------------------------------------------------------------------------------------------------------------------------------|--------------|
| Zanarini and Frankenburg (2001) | Design: Double-blinded RCT<br>Setting: Outpatients, single center<br>Country: United States<br>Funding: Eli Lilly | <i>N</i> =28<br>G1 (9): Placebo<br>G2 (19): Olanzapine (2.5 mg/day)<br>Duration: 6 months | Inclusion: Females; ages 18–40 years; DSM-IV BPD diagnosis<br>Exclusion: MDD; previous treatment with olanzapine; currently taking psychotropic medications; actively abusing alcohol or drugs | Mean age, <i>years</i> ( <i>SD</i> ):<br>G1: 26 (4.5)<br>G2: 28 (7.7)<br>Female: 100%<br>Race/ethnicity:<br>White: 71%<br>Nonwhite: 29% | Primary outcome: SCL-90 at 6 months<br>G2 significantly greater improvements than G1 on four domains of SCL-90 (interpersonal sensitivity, anxiety, anger/hostility, paranoia); overall SCL-90 score NR<br>Incidence of AEs: NR<br>Withdrawal due to AEs:<br>G1: 0% (0/9)<br>G2: 16% (3/19)<br>Attrition: 68%<br>Differential attrition:<br>G1: 89% (8/9)<br>G2: 58% (11/19) | High         |



TABLE D–38. Study characteristics and main results of SGAs compared with placebo (continued)

| Author (year) and/or trial name | Study characteristics                                                                                          | Participants, <i>N</i> ; interventions; duration                                                                                    | Study population, including main inclusion and exclusion criteria                                                                                                                                                                                                                                                                                                                                                                                                                                             | Sample demographics                                                                                                                                                                                                                                          | Primary outcome; main results; attrition                                                                                                                                                                                                                                                                                                                                                                                                                                                                                                                                                                   | Risk of bias |
|---------------------------------|----------------------------------------------------------------------------------------------------------------|-------------------------------------------------------------------------------------------------------------------------------------|---------------------------------------------------------------------------------------------------------------------------------------------------------------------------------------------------------------------------------------------------------------------------------------------------------------------------------------------------------------------------------------------------------------------------------------------------------------------------------------------------------------|--------------------------------------------------------------------------------------------------------------------------------------------------------------------------------------------------------------------------------------------------------------|------------------------------------------------------------------------------------------------------------------------------------------------------------------------------------------------------------------------------------------------------------------------------------------------------------------------------------------------------------------------------------------------------------------------------------------------------------------------------------------------------------------------------------------------------------------------------------------------------------|--------------|
| Zanarini et al. (2011b)         | Design: Double-blinded RCT<br>Setting: Outpatient, multicenter<br>Country: Multi-country<br>Funding: Eli Lilly | <i>N</i> =451<br>G1 (153): Placebo<br>G2 (150): Olanzapine (2.5 mg/day)<br>G3 (148): Olanzapine (5–10 mg/day)<br>Duration: 12 weeks | Inclusion: Males and females; ages 18–65 years; DSM-IV BPD diagnosis; ZAN-BPD total score $\geq 9$<br>Exclusion: Schizophrenia, schizoaffective disorder, schizophreniform disorder, bipolar I disorder, bipolar II disorder, delusional disorder, MDD, SUD within past 3 months, PTSD, panic disorder, or OCD; actively suicidal; BMI < 17; Cluster A personality disorder; new psychotherapy within 3 months prior to visit 1; use of anticholinergic medication as prophylaxis for extrapyramidal symptoms | Mean age, <i>years</i> ( <i>SD</i> ):<br>G1: 34 (11.3)<br>G2: 33 (11.2)<br>G3: 33 (10.0)<br>Female: 74%<br>Race/ethnicity:<br>White: 65%<br>African descent: 7%<br>East/Southeast Asian: 2%<br>Western Asian: 0.2%<br>Hispanic: 24.6%<br>Other origin: 11.1% | Primary outcome: ZAN-BPD at 12 weeks<br>G3 significantly more effective than G1 on ZAN-BPD (-8.5 vs. -6.8, <i>P</i> =0.01; response: 74% vs. 60%, <i>P</i> =0.018) and SCL-90-R (-0.7 vs. -0.6, <i>P</i> <0.05)<br>No significant differences between G1 and G3 on MADRS, GAF, and MOAS<br>No significant differences between G1 and G2 on most outcome measures<br>Incidence of AEs:<br>G1: 61% (93/153)<br>G2: 65% (98/150)<br>G3: 67% (99/148)<br>Withdrawal due to AEs:<br>G1: 3% (5/153)<br>G2: 3% (5/150)<br>G3: 6% (9/148)<br>Attrition: 35%<br>Differential attrition: $\leq 10$ percentage points | Moderate     |

AE=adverse event; BIS=Barratt Impulsiveness Scale; BMI=body mass index; BPD=borderline personality disorder; CGI=Clinical Global Impression Scale; CGI-BPD=Clinical Global Impression Scale for Borderline Personality Disorder; CGI-S=Clinical Global Impression-Severity; DBT=dialectical behavior therapy; DSM-IV=*Diagnostic and Statistical Manual of Mental Disorders*, 4th Edition; ER=extended release; G1=Group 1; G2=Group 2; G3=Group 3; GAF=Global Assessment of Functioning; Ham-A=Hamilton Rating Scale for Anxiety; Ham-D=Hamilton Rating Scale for Depression; MADRS=Montgomery-Åsberg Depression Rating Scale; MDD=major depressive disorder; MDE=major depressive episode; MOAS=Modified Overt Aggression Scale; *N*=sample size; NR=not reported; OCD=obsessive compulsive disorder; PTSD=posttraumatic stress disorder; RCT=randomized controlled trial; SCID-II=Structured Clinical Interview for DSM-IV Axis II Disorders; SCL-90=Symptom Checklist-90; SCL-90-R=Symptom Checklist-90–Revised; SD=standard deviation; SDS=Sheehan Disability Scale; SGA=second-generation antipsychotic; STAXI=State-Trait Anger Expression Inventory; SUD=substance use disorder; ZAN-BPD=Zanarini Rating Scale for Borderline Personality Disorder.

## Second-Generation Antipsychotics vs. Antidepressants

**TABLE D-39. Study characteristics and main results of SGAs compared with antidepressants**

| Author (year) and/or trial name | Study characteristics                                                                                            | Participants, <i>N</i> ; interventions; duration                                                                                                                                      | Study population, including main inclusion and exclusion criteria                                                                                                                                                                                                                                                             | Sample demographics                                                                             | Primary outcome; main results; attrition                                                                                                                                                                                                                                                                                                                                                                                                                                                                          | Risk of bias |
|---------------------------------|------------------------------------------------------------------------------------------------------------------|---------------------------------------------------------------------------------------------------------------------------------------------------------------------------------------|-------------------------------------------------------------------------------------------------------------------------------------------------------------------------------------------------------------------------------------------------------------------------------------------------------------------------------|-------------------------------------------------------------------------------------------------|-------------------------------------------------------------------------------------------------------------------------------------------------------------------------------------------------------------------------------------------------------------------------------------------------------------------------------------------------------------------------------------------------------------------------------------------------------------------------------------------------------------------|--------------|
| Zanarini et al. (2004c)         | Design: double-blinded RCT<br>Setting: Outpatient, single center<br>Country: United States<br>Funding: Eli Lilly | <i>N</i> =45<br>G1 (14): Fluoxetine (10–30 mg/day)<br>G2 (16): Olanzapine (2.5–7.5 mg/day)<br>G3 (15): Fluoxetine (10–30 mg/day) and olanzapine (2.5–7.5 mg/day)<br>Duration: 8 weeks | Inclusion: Females; ages 18–40 years; DSM-IV BPD diagnosis; does not meet criteria for current MDD<br>Exclusion: Current MDD, current or lifetime schizophrenia, schizoaffective disorder, or bipolar disorder; current use of psychotropic medications; medical illness; seizure disorder; substance abuse; acutely suicidal | Mean age, <i>years</i> ( <i>SD</i> ): 23 (5.7)<br>Female: 100%<br>Race/ethnicity:<br>White: 80% | Primary outcome: NR<br>G2 and G3 significantly more effective than G1 on MOAS (19.7 vs. 20.2 vs. 15.4, <i>P</i> =0.003 for G2 vs. G1, <i>P</i> <0.001 for G3 vs. G1) at 8 weeks<br>G2 and G3 significantly more effective than G1 on MADRS (13.6 vs. 11.9 vs. 8.2, <i>P</i> <0.001 for G2 vs. G1, <i>P</i> =0.02 for G3 vs. G1) at 8 weeks<br>Incidence of AEs: NR<br>Withdrawal due to AEs:<br>G1: 7% (1/14)<br>G2: 0% (0/16)<br>G3: 7% (1/15)<br>Attrition: 7%<br>Differential attrition: ≤10 percentage points | Moderate     |

AE=adverse event; BPD=borderline personality disorder; DSM-IV=*Diagnostic and Statistical Manual of Mental Disorders*, 4th Edition; G1=Group 1; G2=Group 2; G3=Group 3; MADRS=Montgomery-Åsberg Depression Scale; MDD=major depressive disorder; MOAS=Modified Overt Aggression Scale; *N*=sample size; NR=not reported; RCT=randomized controlled trial; SD=standard deviation; SGA=second-generation antipsychotic.

## Second-Generation Antipsychotics vs. Second-Generation Antipsychotics

**TABLE D-40. Study characteristics and main results of SGAs compared with SGAs**

| Author (year) and/or trial name | Study characteristics                                                                                     | Participants, <i>N</i> ; interventions; duration                                                            | Study population, including main inclusion and exclusion criteria                                                                                                                                                                                                            | Sample demographics                                                                                            | Primary outcome; main results; attrition                                                                                                                                                                                                                                                                                                | Risk of bias |
|---------------------------------|-----------------------------------------------------------------------------------------------------------|-------------------------------------------------------------------------------------------------------------|------------------------------------------------------------------------------------------------------------------------------------------------------------------------------------------------------------------------------------------------------------------------------|----------------------------------------------------------------------------------------------------------------|-----------------------------------------------------------------------------------------------------------------------------------------------------------------------------------------------------------------------------------------------------------------------------------------------------------------------------------------|--------------|
| Bozzatello et al. (2017)        | Design: Double-blinded RCT<br>Setting: Outpatient, single center<br>Country: Italy<br>Funding: None       | <i>N</i> =51<br>G1 (26): Olanzapine (5–10 mg/day)<br>G2 (25): Asenapine (5–10 mg/day)<br>Duration: 12 weeks | Inclusion: Ages 18–50 years; DSM-5 BPD diagnosis<br>Exclusion: Dementia, schizophrenia or other psychotic disorders, bipolar disorders, co-occurring MDE, or substance abuse; past use of psychotropic medications and/or psychotherapy                                      | Mean age, <i>years</i> ( <i>SD</i> ): 25 (5.3)<br>Female: 63%<br>Race/ethnicity: NR                            | Primary outcome: NR<br>No significant differences between G1 and G2 on BPDSI, CGI-S, BIS, MOAS, Ham-D, and SHI at 12 weeks<br>Incidence of AEs (among completers):<br>G1: 26% (5/19)<br>G2: 19% (4/21)<br>Withdrawal due to AEs:<br>G1: 11% (2/19)<br>G2: 10% (2/21)<br>Attrition: 22%<br>Differential attrition: ≤10 percentage points | High         |
| García-Carmona et al. (2021)    | Design: Retrospective cohort study<br>Setting: Outpatient; multicenter<br>Country: Spain<br>Funding: None | <i>N</i> =116<br>G1 (66): Oral anti-psychotics<br>G2 (50): LAI anti-psychotics<br>Duration: 1–3 months      | Inclusion: Age ≥18 years; DSM-5 BPD diagnosis; treated with an oral or an LAI SGA continuously for >12 months<br>Exclusion: institutionalized; intellectual disability or other psychiatric disorder; concomitant use of two LAI antipsychotics, or missing clinical records | Mean age, <i>years</i> ( <i>SD</i> ):<br>G1: 42.4 (1.4)<br>G2: 39.4 (1.7)<br>Female: 46%<br>Race/ethnicity: NR | Primary outcome: NR<br>G1 significantly more ED visits than G2 (7.9 vs. 6.2, <i>P</i> =0.041)<br>No significant differences in suicidal behavior and hospital admissions<br>Incidence of AEs: NR<br>Withdrawal due to AEs: NR<br>Attrition: NR<br>Differential attrition: NR                                                            | High         |

AE=adverse event; BIS=Barratt Impulsiveness Scale; BPD=borderline personality disorder; BPDSI=Borderline Personality Disorder Severity Index; CGI-S=Clinical Global Impression-Severity; DSM-5=*Diagnostic and Statistical Manual of Mental Disorders*, 5th Edition; ED=emergency department; G1=Group 1; G2=Group 2; Ham-D=Hamilton Rating Scale for Depression; LAI=long-acting injectable; MDE=major depressive episode; MOAS=Modified Overt Aggression Scale; *N*=sample size; NR=not reported; SD=standard deviation; SE=standard error; SGA=second-generation antipsychotic; SHI=Self-Harm Inventory.

## Anticonvulsants vs. Placebo

TABLE D-41. Study characteristics and main results of anticonvulsants compared with placebo

| Author (year) and/or trial name | Study characteristics                                                                                      | Participants, <i>N</i> ; interventions; duration                                               | Study population, including main inclusion and exclusion criteria                                                                                                      | Sample demographics                                                                                                                                            | Primary outcome; main results; attrition                                                                                                                                                                                                                                                            | Risk of bias |
|---------------------------------|------------------------------------------------------------------------------------------------------------|------------------------------------------------------------------------------------------------|------------------------------------------------------------------------------------------------------------------------------------------------------------------------|----------------------------------------------------------------------------------------------------------------------------------------------------------------|-----------------------------------------------------------------------------------------------------------------------------------------------------------------------------------------------------------------------------------------------------------------------------------------------------|--------------|
| Crawford et al. (2018); LABILE  | Design: Double-blinded RCT<br>Setting: Outpatient, multicenter<br>Country: United Kingdom<br>Funding: NIHR | <i>N</i> =276<br>G1 (139): Placebo<br>G2 (137): Lamotrigine (200 mg/day)<br>Duration: 52 weeks | Inclusion: DSM-IV BPD diagnosis<br>Exclusion: Met diagnostic criteria for bipolar disorder (type I or II) or psychotic disorder; history of liver or kidney impairment | Mean age, <i>years</i> ( <i>SD</i> ):<br>G1: 36 (11.0)<br>G2: 36 (11.0)<br>Female: 75%<br>Race/ethnicity:<br>White: 89%<br>Black: 4%<br>Asian: 1%<br>Other: 6% | Primary outcome: ZAN-BPD at 52 weeks<br>No significant differences on ZAN-BPD, SHI, SFQ, and EQ-5D-3L<br>Incidence of AEs:<br>G1: 67% (93/139)<br>G2: 56% (77/137)<br>Withdrawal due to AEs:<br>G1: 1% (1/139)<br>G2: 4% (4/137)<br>Attrition: 29%<br>Differential attrition: <10 percentage points | Moderate     |

**TABLE D-41. Study characteristics and main results of anticonvulsants compared with placebo (continued)**

| Author (year) and/or trial name | Study characteristics                                                                                                                      | Participants, <i>N</i> ; interventions; duration                                                  | Study population, including main inclusion and exclusion criteria                                                                                                                                                                                                                                                                                                                   | Sample demographics                                                                                                                                                   | Primary outcome; main results; attrition                                                                                                                                                                                                                                                                                                                                                                                                                                           | Risk of bias |
|---------------------------------|--------------------------------------------------------------------------------------------------------------------------------------------|---------------------------------------------------------------------------------------------------|-------------------------------------------------------------------------------------------------------------------------------------------------------------------------------------------------------------------------------------------------------------------------------------------------------------------------------------------------------------------------------------|-----------------------------------------------------------------------------------------------------------------------------------------------------------------------|------------------------------------------------------------------------------------------------------------------------------------------------------------------------------------------------------------------------------------------------------------------------------------------------------------------------------------------------------------------------------------------------------------------------------------------------------------------------------------|--------------|
| Frankenburg and Zanarini (2002) | Design: Double-blinded RCT<br>Setting: Community recruitment with advertisements<br>Country: United States<br>Funding: Abbott Laboratories | <i>N</i> =30<br>G1 (10): Placebo<br>G2 (20): Divalproex sodium (250 mg/day)<br>Duration: 24 weeks | Inclusion: Females; ages 18–40 years; DIB-R and DSM-IV BPD and bipolar II disorder diagnoses<br>Exclusion: Formerly treated with divalproex sodium; medically ill; seizure disorder; current substance abuse; current criteria for an MDE or hypomanic episode; current or lifetime criteria for schizophrenia, schizoaffective disorder, psychotic disorder, or bipolar I disorder | Mean age, <i>years</i> ( <i>SD</i> ):<br>G1: 26 (7.3)<br>G2: 27 (7.4)<br>Female: 100%<br>Race/ethnicity:<br>White: 67%<br>Black: 10%<br>Hispanic: 13%<br>Biracial: 7% | Primary outcome: MOAS, SCL-90-R (subscales on anger, interpersonal hostility, depression) at 24 weeks<br>G2 significantly more effective than G1 on MOAS (3.0 vs. 1.9, <i>P</i> =0.03) and SCL-90-R subscales on anger/hostility (0.8 vs. 0.6, <i>P</i> =0.01) and interpersonal sensitivity (0.8 vs. 0.4, <i>P</i> =0.04)<br>Incidence of AEs: NR<br>Withdrawal due to AEs:<br>G1: 30% (3/10)<br>G2: 5% (1/20)<br>Attrition: 63%<br>Differential attrition: <10 percentage points | High         |

**TABLE D-41. Study characteristics and main results of anticonvulsants compared with placebo (continued)**

| Author (year) and/or trial name | Study characteristics                                                                                                            | Participants, <i>N</i> ; interventions; duration                                                 | Study population, including main inclusion and exclusion criteria                                                                                                                                  | Sample demographics                                                                                              | Primary outcome; main results; attrition                                                                                                                                                                                                                                                                         | Risk of bias |
|---------------------------------|----------------------------------------------------------------------------------------------------------------------------------|--------------------------------------------------------------------------------------------------|----------------------------------------------------------------------------------------------------------------------------------------------------------------------------------------------------|------------------------------------------------------------------------------------------------------------------|------------------------------------------------------------------------------------------------------------------------------------------------------------------------------------------------------------------------------------------------------------------------------------------------------------------|--------------|
| Hollander et al. (2001)         | Design: Double-blinded RCT<br>Setting: Outpatient, single center<br>Country: United States<br>Funding: Abbott Laboratories, NIMH | <i>N</i> =16<br>G1 (4): Placebo<br>G2 (12): Divalproex sodium (250 mg/day)<br>Duration: 10 weeks | Inclusion: DSM-IV BPD diagnosis<br>Exclusion: Medical or neurological illness; psychotic disorders, substance abuse, bipolar disorder I or II, or MDD; suicidal ideation                           | Mean age, years ( <i>SD</i> ): NR<br>Female: 52%<br>Race/ethnicity:<br>White: 67%<br>Black: 14%<br>Hispanic: 19% | Primary outcome: NR<br>No significant differences on CGI-I, GAS, MOAS, and AQ<br>Incidence of AEs: NR<br>Withdrawal due to AEs:<br>G1: 0% (0/4)<br>G2: 0% (0/12)<br>Attrition: 63%<br>Differential attrition:<br>G1: 100% (4/4)<br>G2: 50% (6/12)                                                                | High         |
| Loew et al. (2006)              | Design: Double-blinded RCT<br>Setting: Single center or multicenter<br>Country: Germany and Austria<br>Funding: None             | <i>N</i> =56<br>G1 (28): Placebo<br>G2 (28): Topiramate (200 mg/day)<br>Duration: 10 weeks       | Inclusion: Females; ages 18–35 years; DSM-IV BPD diagnosis<br>Exclusion: Schizophrenia; current use of psychotropic medication or psychotherapy; suicidal; substance abuse; severe somatic illness | Mean age, years ( <i>SD</i> ):<br>G1: 26 (5.7)<br>G2: 25 (5.3)<br>Female: 100%<br>Race/ethnicity: NR             | Primary outcome: SCL-90-R, SF-36, and IIP at 10 weeks<br>G2 significantly more effective than G1 on SCL-90-R (7.4 vs. 1.8, $P < 0.001$ ), SF-36 (data NR, $P < 0.01$ ), and IIP (data NR)<br>Incidence of AEs: NR<br>Withdrawal due to AEs: NR<br>Attrition: 7%<br>Differential attrition: <10 percentage points | Low          |

**TABLE D-41. Study characteristics and main results of anticonvulsants compared with placebo (continued)**

| Author (year) and/or trial name | Study characteristics                                                                                         | Participants, <i>N</i> ; interventions; duration                                                      | Study population, including main inclusion and exclusion criteria                                                                                                                                                                                                                                                              | Sample demographics                                                                                                                                                   | Primary outcome; main results; attrition                                                                                                                                                                                                                                                                                                                                                   | Risk of bias |
|---------------------------------|---------------------------------------------------------------------------------------------------------------|-------------------------------------------------------------------------------------------------------|--------------------------------------------------------------------------------------------------------------------------------------------------------------------------------------------------------------------------------------------------------------------------------------------------------------------------------|-----------------------------------------------------------------------------------------------------------------------------------------------------------------------|--------------------------------------------------------------------------------------------------------------------------------------------------------------------------------------------------------------------------------------------------------------------------------------------------------------------------------------------------------------------------------------------|--------------|
| Moen et al. (2012)              | Design: Double-blinded RCT<br>Setting: Outpatient, single center<br>Country: United States<br>Funding: Abbott | <i>N</i> =15<br>G1 (5): Placebo<br>G2 (10): Divalproex sodium (NR)<br>Duration: 12 weeks              | Inclusion: Ages 21–55 years; DSM-IV BPD diagnosis; score $\geq 150$ on SCL-90; score $\geq 5$ on SCID-II<br>Exclusion: Current or past history of bipolar disorder, schizophrenia, or MDD with psychotic features; current psychotropic medication; acutely suicidal; SUD; seizure disorder and/or anti-convulsant medications | Mean age, <i>years</i> ( <i>range</i> )<br>G1: 37 (22–51)<br>G2: 34 (23–45)<br>Female: 80%<br>Race/ethnicity:<br>White: 80%<br>Black: 7%<br>Hispanic: 7%<br>Mixed: 7% | Primary outcome: NR<br>No significant differences on SCL-90, BIS, and BEST<br>Incidence of AEs: NR<br>Withdrawal due to AEs: NR<br>Attrition: 40%<br>Differential attrition: <10 percentage points                                                                                                                                                                                         | High         |
| Nickel et al. (2004)            | Design: Double-blinded RCT<br>Setting: Community recruitment<br>Country: Germany<br>Funding: None             | <i>N</i> =31<br>G1 (10): Placebo (50 mg/day)<br>G2 (21): Topiramate (250 mg/day)<br>Duration: 8 weeks | Inclusion: Females; ages 20–35 years; DSM-IV BPD diagnosis<br>Exclusion: Current schizophrenia, MDD, or bipolar disorder; current use of psychotropic medication or psychotherapy; somatically ill; actively suicidal; substance abuse                                                                                         | Mean age, <i>years</i> ( <i>SD</i> ):<br>G1: 27 (NR)<br>G2: 26 (NR)<br>Female: 100%<br>Race/ethnicity: NR                                                             | Primary outcome: STAXI at 8 weeks<br>G2 significantly more effective than G1 on four out of five subscales on STAXI ( <i>P</i> values from 0.05 to 0.01); no significant improvement on subscale assessing tendency to repress anger<br>Incidence of AEs: NR<br>Withdrawal due to AEs:<br>G1: 0% (0/10)<br>G2: 0% (0/21)<br>Attrition: 6%<br>Differential attrition: <10 percentage points | Moderate     |

**TABLE D-41. Study characteristics and main results of anticonvulsants compared with placebo (continued)**

| Author (year) and/or trial name | Study characteristics                                                                                                          | Participants, <i>N</i> ; interventions; duration                                          | Study population, including main inclusion and exclusion criteria                                                                                                                                                     | Sample demographics                                                                              | Primary outcome; main results; attrition                                                                                                                                                                                                                                                                                                                                                   | Risk of bias |
|---------------------------------|--------------------------------------------------------------------------------------------------------------------------------|-------------------------------------------------------------------------------------------|-----------------------------------------------------------------------------------------------------------------------------------------------------------------------------------------------------------------------|--------------------------------------------------------------------------------------------------|--------------------------------------------------------------------------------------------------------------------------------------------------------------------------------------------------------------------------------------------------------------------------------------------------------------------------------------------------------------------------------------------|--------------|
| Nickel et al. (2005)            | Design: Double-blinded RCT<br>Setting: Outpatient recruitment and community advertisement<br>Country: Germany<br>Funding: None | <i>N</i> =44<br>G1 (22): Placebo<br>G2 (22): Topiramate (250 mg/day)<br>Duration: 8 weeks | Inclusion: Males; age >18 years; DSM-IV BPD diagnosis<br>Exclusion: Acute psychosis, severe MDD or bipolar disorder; current use of psychotropic medication or psychotherapy; somatically ill; actively suicidal; SUD | Mean age, years ( <i>SD</i> ):<br>G1: 29 (NR)<br>G2: 30 (NR)<br>Female: 0%<br>Race/ethnicity: NR | Primary outcome: STAXI at 8 weeks<br>G2 significantly more effective than G1 on four out of five subscales on STAXI ( <i>P</i> values from 0.05 to 0.01); no significant improvement on subscale assessing tendency to repress anger<br>Incidence of AEs: NR<br>Withdrawal due to AEs:<br>G1: 0% (0/22)<br>G2: 0% (0/22)<br>Attrition: 5%<br>Differential attrition: <10 percentage points | Moderate     |



**TABLE D-41. Study characteristics and main results of anticonvulsants compared with placebo (continued)**

| Author (year) and/or trial name | Study characteristics                                                                                                  | Participants, <i>N</i> ; interventions; duration                                               | Study population, including main inclusion and exclusion criteria                                                                                                                                                                                                                                                                                          | Sample demographics                                                                                                   | Primary outcome; main results; attrition                                                                                                                                                                                                                                                                                                                                                                                                                | Risk of bias |
|---------------------------------|------------------------------------------------------------------------------------------------------------------------|------------------------------------------------------------------------------------------------|------------------------------------------------------------------------------------------------------------------------------------------------------------------------------------------------------------------------------------------------------------------------------------------------------------------------------------------------------------|-----------------------------------------------------------------------------------------------------------------------|---------------------------------------------------------------------------------------------------------------------------------------------------------------------------------------------------------------------------------------------------------------------------------------------------------------------------------------------------------------------------------------------------------------------------------------------------------|--------------|
| Reich et al. (2009)             | Design: Double-blinded RCT<br>Setting: Outpatient, single center<br>Country: United States<br>Funding: GlaxoSmithKline | <i>N</i> =28<br>G1 (13): Placebo<br>G2 (15): Lamotrigine (50–275 mg/day)<br>Duration: 12 weeks | Inclusion: DSM-IV BPD diagnosis; score $\geq 8$ on DIB-R; “serious” score on affective instability item of ZAN-BPD; score $\geq 14$ on ALS<br>Exclusion: Dementia, psychiatric disorder, bipolar disorder, psychotic disorder, or SUD; currently hospitalized; previous treatment with lamotrigine or psychotherapy; active suicidal or homicidal ideation | Mean age, <i>years</i> ( <i>SD</i> ):<br>G1: 35 (9.7)<br>G2: 28 (9.5)<br>Female: 89%<br>Race/ethnicity:<br>White: 89% | Primary outcome: ALS, affective instability item of ZAN-BPD at 12 weeks<br>G2 significantly greater improvements than G1 on ALS (0.71 vs. 0.40, $P=0.012$ ) and affective lability of ZAN-BPD (1.5 vs. 1.1, $P=0.043$ )<br>No significant difference on ZAN-BPD<br>Incidence of AEs:<br>G1: 31% (4/13)<br>G2: 40% (6/15)<br>Withdrawal due to AEs:<br>G1: 0% (0/13)<br>G2: 0% (3/15)<br>Attrition: 39%<br>Differential attrition: <10 percentage points | High         |

**TABLE D-41. Study characteristics and main results of anticonvulsants compared with placebo (continued)**

| Author (year) and/or trial name | Study characteristics                                                                                                | Participants, N; interventions; duration                                          | Study population, including main inclusion and exclusion criteria                                                                                                                                                              | Sample demographics                                                                       | Primary outcome; main results; attrition                                                                                                                                                                                                                                                                                                                                                                                                 | Risk of bias |
|---------------------------------|----------------------------------------------------------------------------------------------------------------------|-----------------------------------------------------------------------------------|--------------------------------------------------------------------------------------------------------------------------------------------------------------------------------------------------------------------------------|-------------------------------------------------------------------------------------------|------------------------------------------------------------------------------------------------------------------------------------------------------------------------------------------------------------------------------------------------------------------------------------------------------------------------------------------------------------------------------------------------------------------------------------------|--------------|
| Tritt et al. (2005)             | Design: Double-blinded RCT<br>Setting: single center or multicenter<br>Country: Germany and Austria<br>Funding: None | N=27<br>G1 (9): Placebo<br>G2 (18): Lamotrigine (200 mg/day)<br>Duration: 8 weeks | Inclusion: Females; ages 20–40 years; DSM-IV BPD diagnosis<br>Exclusion: Schizophrenia, MDD, or bipolar disorder; current use of psychotropic medication or psychotherapy; somatically ill; actively suicidal; substance abuse | Mean age, years (SD):<br>G1: 29 (NR)<br>G2: 29 (NR)<br>Female: 100%<br>Race/ethnicity: NR | Primary outcome: STAXI at 8 weeks<br>G2 significantly more effective than G1 on all five subscales of STAXI ( <i>P</i> values from <0.05 to <0.01; overall STAXI score NR)<br>G2 improved more than G1 with respect to all STAXI scales on assessments after 8 weeks of treatment<br>Incidence of AEs: NR<br>Withdrawal due to AEs:<br>G1: 11% (1/9)<br>G2: 6% (1/18)<br>Attrition: 11%<br>Differential attrition: ≤10 percentage points | Low          |

AE=adverse event; ALS=Affective Liability Scale; AQ=Aggression Questionnaire; BEST=Borderline Evaluation of Severity Over Time; BIS=Barratt Impulsiveness Scale; BPD=borderline personality disorder; CGI-I=Clinical Global Impression-Improvement; DIB-R=Diagnostic Interview for Borderlines-Revised; DSM-IV=*Diagnostic and Statistical Manual of Mental Disorders*, 4th Edition; EQ-5D-3L=European Quality of Life-5 Dimension-3 level version; G1=Group 1; G2=Group 2; GAS=Global Assessment Scale; IIP=Inventory of Interpersonal Problems; LABILE=Lamotrigine and Borderline Personality Disorder: Investigating Long-Term Effects; MDD= major depressive disorder; MDE=major depressive disorder; MOAS=Modified Overt Aggression Scale; NIHR=National Institute for Health Research; NIMH=National Institute of Mental Health; N=sample size; NR=not reported; RCT=randomized controlled trial; SCID-II=Structured Clinical Interview for DSM-IV Axis II Disorders; SCL-90=Symptom Checklist-90; SCL-90-R=Symptom Checklist-90-Revised; SD=standard deviation; SF-36=Short Form Survey; SFQ=Social Functioning Questionnaire; SHI=Self-Harm Inventory; STAXI=State-Trait Anger Expression Inventory; SUD=substance use disorder; ZAN-BPD=Zanarini Rating Scale for Borderline Personality Disorder.

## Antidepressants vs. Placebo

**TABLE D-42. Study characteristics and main results of antidepressants compared with placebo**

| Author (year) and/or trial name | Study characteristics                                                                                            | Participants, <i>N</i> ; interventions; duration                                          | Study population, including main inclusion and exclusion criteria                                                                                                                                                           | Sample demographics                                                                                                            | Primary outcome; main results; attrition                                                                                                                                                                                                                                    | Risk of bias |
|---------------------------------|------------------------------------------------------------------------------------------------------------------|-------------------------------------------------------------------------------------------|-----------------------------------------------------------------------------------------------------------------------------------------------------------------------------------------------------------------------------|--------------------------------------------------------------------------------------------------------------------------------|-----------------------------------------------------------------------------------------------------------------------------------------------------------------------------------------------------------------------------------------------------------------------------|--------------|
| Simpson et al. (2004)           | Design: Double-blinded RCT<br>Setting: Outpatient, single center<br>Country: United States<br>Funding: Eli Lilly | <i>N</i> =25<br>G1 (13): Placebo<br>G2 (12): Fluoxetine (40 mg/day)<br>Duration: 12 weeks | Inclusion: Admission to Women's Partial Program; DSM-IV BPD diagnosis<br>Exclusion: SUD; seizure disorder; unstable medical conditions; history of schizophrenia or bipolar disorder; previous adequate trial of fluoxetine | Mean age, years ( <i>SD</i> ): 35 (10.1)<br>Female: 100%<br>Race/ethnicity:<br>White: 72%<br>Black: 20%<br>Native American: 8% | Primary outcome: NR<br>When corrected for multiple testing, no significant differences between G1 and G2 on STAXI, MOAS, or GAF at mean of 10 weeks<br>Incidence of AEs: NR<br>Withdrawal due to AEs: NR<br>Attrition: 20%<br>Differential attrition: ≤10 percentage points | High         |

AE=adverse event; BPD=borderline personality disorder; DSM-IV=*Diagnostic and Statistical Manual of Mental Disorders*, 4th Edition; G1=Group 1; G2=Group 2; GAF=Global Assessment of Functioning; MOAS=Modified Overt Aggression Scale; *N*=sample size; NR=not reported; RCT=randomized controlled trial; SD=standard deviation; STAXI=State-Trait Anger Expression Inventory; SUD=substance use disorder.

APPENDIX E

# **Risk of Bias Ratings for Individual Studies Supporting Guideline Statements**

Risk of bias domains

|                                 | D1 | D2 | D3 | D4 | D5 | Overall |
|---------------------------------|----|----|----|----|----|---------|
| Amianto et al. (2011)           | -  | +  | +  | +  | +  | -       |
| Andión et al. (2012)            | X  | X  | +  | +  | -  | X       |
| Andreoli et al. (2016)          | +  | -  | -  | +  | +  | -       |
| Bateman and Fonagy (2009)       | +  | +  | -  | +  | -  | -       |
| Beck et al. (2020)              | +  | X  | X  | +  | +  | X       |
| Bellino et al. (2006)           | -  | -  | +  | +  | -  | -       |
| Bellino et al. (2007)           | -  | -  | -  | +  | -  | -       |
| Bellino et al. (2010)           | -  | X  | +  | X  | -  | X       |
| Bianchini et al. (2019)         | -  | +  | +  | +  | +  | -       |
| Black et al. (2014)             | +  | +  | X  | +  | -  | -       |
| Blum et al. (2008)              | -  | -  | X  | -  | -  | X       |
| Bogenschutz and Nurnberg (2004) | -  | -  | X  | +  | -  | X       |
| Bos et al. (2010)               | -  | -  | -  | +  | -  | -       |
| Bozzatello et al. (2017)        | -  | +  | -  | X  | -  | X       |
| Bozzatello and Bellino (2020)   | -  | +  | +  | -  | +  | -       |
| Cailhol et al. (2014)           | -  | +  | +  | +  | -  | -       |

Domains:

- D1: Bias arising from the randomization process.
- D2: Bias due to deviations from intended intervention.
- D3: Bias due to missing outcome data.
- D4: Bias in measurement of the outcome.
- D5: Bias in selection of the reported result.

Judgement

- X High
- Some concerns
- +

|                                 | Risk of bias domains |    |    |    |    | Overall |
|---------------------------------|----------------------|----|----|----|----|---------|
|                                 | D1                   | D2 | D3 | D4 | D5 |         |
| Carlyle et al. (2020)           | -                    | -  | +  | +  | +  | -       |
| Carmona i Farrés et al. (2019a) | -                    | +  | X  | +  | -  | X       |
| Carmona i Farrés et al. (2019b) | X                    | -  | X  | +  | -  | X       |
| Carter et al. (2010)            | +                    | +  | +  | +  | +  | +       |
| Chanen et al. (2008)            | +                    | +  | +  | +  | -  | -       |
| Clarkin et al. (2007)           | -                    | -  | X  | +  | -  | X       |
| Cottraux et al. (2009)          | +                    | +  | -  | +  | -  | -       |
| Crawford et al. (2018)          | +                    | -  | -  | +  | +  | -       |
| Davidson et al. (2006)          | +                    | -  | +  | +  | +  | -       |
| Doering et al. (2010)           | +                    | +  | X  | +  | +  | X       |
| Elices et al. (2016)            | -                    | +  | X  | -  | +  | X       |
| Farrell et al. (2009)           | -                    | -  | -  | +  | -  | -       |
| Feigenbaum et al. (2012)        | +                    | +  | X  | +  | -  | X       |
| Frankenburg and Zanarini (2002) | -                    | +  | X  | +  | -  | X       |
| Giesen-Bloo et al. (2006)       | +                    | +  | X  | -  | -  | X       |
| Gratz et al. (2014)             | -                    | +  | +  | +  | +  | -       |

Domains:

D1: Bias arising from the randomization process.

D2: Bias due to deviations from intended intervention.

D3: Bias due to missing outcome data.

D4: Bias in measurement of the outcome.

D5: Bias in selection of the reported result.

Judgement

X High

- Some concerns

+

Low

|                            | Risk of bias domains |    |    |    |    | Overall |
|----------------------------|----------------------|----|----|----|----|---------|
|                            | D1                   | D2 | D3 | D4 | D5 |         |
| Gregory et al. (2008)      | -                    | +  | X  | -  | -  | X       |
| Harned et al. (2014)       | -                    | X  | X  | +  | -  | X       |
| Herpertz et al. (2020)     | X                    | +  | X  | +  | +  | X       |
| Hilden et al. (2021)       | +                    | +  | -  | -  | +  | -       |
| Hollander et al. (2001)    | -                    | +  | X  | +  | -  | X       |
| Jørgensen et al. (2013)    | -                    | X  | X  | -  | -  | X       |
| Kramer et al. (2011)       | -                    | +  | X  | X  | -  | X       |
| Kramer et al. (2014)       | +                    | +  | -  | +  | +  | -       |
| Laurensen et al. (2018)    | +                    | +  | -  | +  | +  | -       |
| Leichsenring et al. (2016) | +                    | -  | X  | X  | +  | X       |
| Leppänen et al. (2016)     | -                    | X  | X  | +  | -  | X       |
| Lin et al. (2019)          | -                    | -  | +  | +  | +  | -       |
| Linehan et al. (2002)      | -                    | +  | -  | -  | -  | -       |
| Linehan et al. (2006)      | -                    | +  | X  | +  | -  | X       |
| Linehan et al. (2008)      | X                    | +  | X  | +  | X  | X       |
| Linehan et al. (2015)      | -                    | X  | X  | +  | +  | X       |
| Loew et al. (2006)         | +                    | +  | +  | +  | -  | +       |

Domains:

D1: Bias arising from the randomization process.

D2: Bias due to deviations from intended intervention.

D3: Bias due to missing outcome data.

D4: Bias in measurement of the outcome.

D5: Bias in selection of the reported result.

Judgement

X High

- Some concerns

+ Low

|                           | Risk of bias domains |    |    |    |    | Overall |
|---------------------------|----------------------|----|----|----|----|---------|
|                           | D1                   | D2 | D3 | D4 | D5 |         |
| Loew et al. (2006)        | +                    | +  | +  | +  | -  | +       |
| McMain et al. (2009)      | +                    | +  | X  | +  | -  | X       |
| McMain et al. (2017)      | +                    | -  | +  | +  | -  | -       |
| Moен et al. (2012)        | -                    | +  | X  | +  | -  | X       |
| Morton et al. (2012)      | -                    | +  | -  | -  | -  | -       |
| Nadort et al. (2009)      | +                    | -  | -  | +  | -  | -       |
| Nickel et al. (2004)      | -                    | +  | +  | +  | -  | -       |
| Nickel et al. (2005)      | -                    | -  | +  | +  | -  | -       |
| Nickel et al. (2006)      | +                    | +  | -  | +  | -  | -       |
| Pascual et al. (2008)     | -                    | +  | X  | +  | +  | X       |
| Pascual et al. (2015)     | +                    | X  | X  | +  | -  | X       |
| Philips et al. (2018)     | +                    | +  | X  | -  | -  | X       |
| Reich et al. (2009)       | -                    | X  | X  | +  | -  | X       |
| Reneses et al. (2013)     | -                    | +  | X  | +  | +  | X       |
| Robinson et al. (2016)    | +                    | X  | X  | +  | +  | X       |
| Santisteban et al. (2015) | +                    | -  | X  | X  | -  | X       |

Domains:

D1: Bias arising from the randomization process.

D2: Bias due to deviations from intended intervention.

D3: Bias due to missing outcome data.

D4: Bias in measurement of the outcome.

D5: Bias in selection of the reported result.

Judgement

X High

- Some concerns

+ Low



|                                 | Risk of bias domains |    |    |    |    | Overall |
|---------------------------------|----------------------|----|----|----|----|---------|
|                                 | D1                   | D2 | D3 | D4 | D5 |         |
| Schmidt et al. (2021)           | -                    | +  | X  | -  | -  | X       |
| Schulz et al. (2008)            | +                    | +  | X  | +  | +  | X       |
| Simpson et al. (2004)           | -                    | X  | +  | +  | -  | X       |
| Sinnaeve et al. (2018)          | +                    | +  | X  | X  | +  | X       |
| Smits et al. (2020)             | -                    | +  | X  | +  | -  | -       |
| Soler et al. (2005)             | -                    | +  | X  | +  | -  | X       |
| Soler et al. (2009)             | -                    | X  | X  | +  | -  | X       |
| Tritt et al. (2005)             | +                    | +  | +  | +  | -  | +       |
| Verheul et al. (2003)           | -                    | +  | -  | -  | -  | -       |
| Walton et al. (2020)            | +                    | +  | -  | +  | +  | -       |
| Weinberg et al. (2006)          | -                    | -  | +  | +  | -  | -       |
| Zanarini and Frankenburg (2001) | -                    | X  | X  | -  | -  | X       |
| Zanarini et al. (2004c)         | -                    | -  | +  | +  | -  | -       |
| Zanarini and Frankenburg (2008) | -                    | +  | +  | X  | -  | -       |
| Zanarini et al. (2011b)         | +                    | +  | X  | +  | -  | -       |
| Zanarini et al. (2018)          | -                    | +  | +  | -  | +  | -       |

Domains:

D1: Bias arising from the randomization process.

D2: Bias due to deviations from intended intervention.

D3: Bias due to missing outcome data.

D4: Bias in measurement of the outcome.

D5: Bias in selection of the reported result.

Judgement

X High

- Some concerns

+ Low

## ROBINS-I Quality Ratings

|       |                                 | Risk of bias |    |    |    |    |    |    |         |
|-------|---------------------------------|--------------|----|----|----|----|----|----|---------|
|       |                                 | D1           | D2 | D3 | D4 | D5 | D6 | D7 | Overall |
| Study | Bales et al. (2015)             |              |    |    |    |    |    |    |         |
|       | Barnicot and Crawford (2019)    |              |    |    |    |    |    |    |         |
|       | Bartak et al. (2011)            |              |    |    |    |    |    |    |         |
|       | Bohus et al. (2004)             |              |    |    |    |    |    |    |         |
|       | García-Carmona et al. (2021)    |              |    |    |    |    |    |    |         |
|       | González-González et al. (2021) |              |    |    |    |    |    |    |         |
|       | Gregory and Sachdeva (2016)     |              |    |    |    |    |    |    |         |
|       | Guillén Botella et al. (2021)   |              |    |    |    |    |    |    |         |
|       | Kvarstein et al. (2015)         |              |    |    |    |    |    |    |         |
|       | Laporte et al. (2018)           |              |    |    |    |    |    |    |         |
|       | Lyng et al. (2020)              |              |    |    |    |    |    |    |         |
|       | Navarro-Haro et al. (2018)      |              |    |    |    |    |    |    |         |

D1: Random sequence generation  
 D2: Allocation concealment  
 D3: Blinding of participants and personnel  
 D4: Blinding of outcome assessment  
 D5: Incomplete outcome data  
 D6: Selective reporting  
 D7: Other sources of bias

Judgement  
 High  
 Unclear  
 Low



## APPENDIX F

# **Review of Benefits and Harms, Patient Preferences, Other Practice Guidelines, and Quality Measurement Considerations**

## Use of Guidelines to Enhance Quality of Care

Clinical practice guidelines can help enhance quality by synthesizing available research evidence and delineating recommendations for care on the basis of the available evidence. In some circumstances, practice guideline recommendations will be appropriate to use in developing quality measures. Guideline statements can also be used in other ways, such as educational activities or electronic decision support, to enhance the quality of care that patients receive. Furthermore, when availability of services is a major barrier to implementing guideline recommendations, improved tracking of service availability and program development initiatives may need to be implemented by health organizations, health insurance plans, federal or state agencies, or other regulatory programs.

Typically, guideline recommendations that are chosen for development into quality measures will advance one or more aims of the Institute of Medicine's (2001) report *Crossing the Quality Chasm* by facilitating care that is safe, effective, patient-centered, timely, efficient, and equitable. To achieve these aims, quality measures (Watkins et al. 2015) are needed that span the continuum of care (e.g., prevention, screening, assessment, treatment, continuing care), address the different levels of the health system hierarchy (e.g., system-wide, organization, program/department, individual clinicians), and include measures of different types (e.g., process, outcome, patient-centered experience). Emphasis is also needed on factors that influence the dissemination and adoption of evidence-based practices (Drake et al. 2008; Greenhalgh et al. 2004; Horvitz-Lennon et al. 2009a).

Often, quality measures will focus on gaps in care or on care processes and outcomes that have significant variability across specialties, health care settings, geographical areas, or patients' demographic characteristics. Administrative databases, registries, and data from electronic health record (EHR) systems can help to identify gaps in care and key domains that would benefit from performance improvements (Acevedo et al. 2015; Patel et al. 2015; Watkins et al. 2016). Nevertheless, for some guideline statements, evidence of practice gaps or variability will be based on anecdotal observations if the typical practices of psychiatrists and other health professionals are unknown. Variability in the use of guideline-recommended approaches may reflect appropriate differences that are tailored to the patient's preferences, treatment of co-occurring illnesses, or other clinical circumstances that may not have been studied in the available research. On the other hand, variability may indicate a need to strengthen clinician knowledge or to address other barriers to adopting best practices (Drake et al. 2008; Greenhalgh et al. 2004; Horvitz-Lennon et al. 2009a). When performance is compared among organizations, variability may reflect a need for quality improvement initiatives

to improve overall outcomes but could also reflect case-mix differences such as socioeconomic factors or the prevalence of co-occurring illnesses.

Conceptually, quality measures can be developed for purposes of accountability, for internal or health system–based quality improvement, or both. Accountability measures require clinicians to report their rate of performance of a specified process, intermediate outcome, or outcome in a specified group of patients. Because these data are used to determine financial incentives or penalties based on performance, accountability measures must be scientifically validated, have a strong evidence base, fill gaps in care, and be broadly relevant and meaningful to patients, clinicians, and policy makers. Development of such measures is complex and requires development of the measure specification and pilot testing (Center for Health Policy / Center for Primary Care and Outcomes Research and Battelle Memorial Institute 2011; Fernandes-Taylor and Harris 2012; Iyer et al. 2016; Pincus et al. 2016; Watkins et al. 2011). The purpose of the measure specification is to create detailed, clearly written, and precise instructions on the calculation of the measure so that, when implemented, the measure will be consistent, reliable, and effective in addressing quality in a specific target population (Centers for Medicare and Medicaid Services 2023). In contrast, internal or health system–based quality improvement measures are typically designed by and for individual providers, health systems, or payers. They typically focus on measurements that can suggest ways for clinicians or administrators to improve efficiency and delivery of services within a particular setting. Internal or health system–based quality improvement programs may or may not link performance with payment, and, in general, these measures are not subject to strict testing and validation requirements.

Regardless of the purpose of the quality measure, it must be possible to define the applicable patient group (i.e., the denominator) and the clinical action or outcome of interest that is measured (i.e., the numerator) in validated, clear, and quantifiable terms. The measure also needs to be feasible. More specifically, the health system’s or clinician’s performance on the measure must be readily ascertained from chart review, patient-reported outcome measures, registries, or administrative data. In addition, use of the measure should yield improvements in quality of care to justify any clinician burden (e.g., documentation burden) or related administrative costs (e.g., for manual extraction of data from charts, for modifications of EHRs to capture required data elements).

Documentation of quality measures can be challenging, and, depending on the practice setting, can pose practical barriers to meaningful interpretation of quality measures based on guideline recommendations. For example, when recommendations relate to patient assessment or treatment selection, clinical judgment may need to be used to determine whether the clinician has addressed the factors that merit emphasis for an individual patient. In other circumstances, standardized instruments can facilitate quality measurement reporting, but it is difficult to assess the appropriateness of clinical judgment in a validated, standardized manner. Furthermore, utilization of standardized assessments remains low (Fortney et al. 2017), and clinical findings are not routinely documented in a standardized format. Many clinicians appropriately use free text prose to describe symptoms, response to treatment, discussions with family, plans of treatment, and other aspects of care and clinical decision-making. Reviewing these free text records for measurement purposes would be impractical, and it would be difficult to hold clinicians accountable to such measures without advances in natural language processing technology and further increases in EHR use among mental health professionals.

Possible unintended consequences of any measures would also need to be addressed in testing the measure specifications within a variety of practice settings. For example, in many health care systems, multiple clinicians are involved in the care of a patient, and it is misleading if performance on the measure is attributed to the performance of a single clinician or group of clinicians. As another challenge, if the measure specification requires precise wording for the measure to be met, clinicians may begin to document using standardized language that does not accurately reflect what has occurred in practice. If multiple discrete fields are used to capture information, data will be easily retrievable and reportable, but oversimplification is a possible unintended consequence of measurement, and documentation burden is likely to be high (Johnson et al. 2021). Just as guideline

developers must balance the benefits and harms of a particular guideline recommendation, developers of performance measures must weigh the potential benefits, burdens, and unintended consequences of optimizing quality measure design and testing.

## Assessment and Determination of Treatment Plan

### Statement 1 – Initial Assessment

APA recommends (1C) that the initial assessment of a patient with possible borderline personality disorder include the reason the individual is presenting for evaluation; the patient's goals and preferences for treatment; a review of psychiatric symptoms, including core features of personality disorders and common co-occurring disorders; a psychiatric treatment history; an assessment of physical health; an assessment of psychosocial and cultural factors; a mental status examination; and an assessment of risk of suicide, self-injury, and aggressive behaviors, as outlined in APA's *Practice Guidelines for the Psychiatric Evaluation of Adults*, 3rd Edition.

#### Benefits

Assessment of current and prior symptoms and previous treatment are beneficial for verifying that BPD is present and for identifying its severity and longitudinal course. Knowledge of the patient's current symptoms and functioning provides important baseline data for assessing the severity of the clinical presentation and effects of subsequent interventions. Assessment of risk factors, including risk of suicide, self-injury, and aggressive behaviors, is essential to developing a plan of treatment and determining an optimal treatment setting. Similarly, identification of co-occurring disorders and determination of the patient's goals and preferences for treatment will aid in the development of a comprehensive treatment plan.

#### Harms<sup>1</sup>

The harms of a detailed initial assessment are not well studied but are expected to be small, if any. It is possible that time used to focus on a detailed assessment could reduce time available to address other issues of importance to the patient or of relevance to diagnosis and treatment planning. Some individuals may have difficulty concentrating or may become frustrated if asked multiple questions during the evaluation. This could interfere with the therapeutic relationship between patient and clinician.

#### Patient Preferences

Although there is no specific evidence on patient preferences related to assessment in individuals with BPD, clinical experience suggests that most patients are cooperative with and accepting of these types of questions as part of an initial assessment.

#### Balancing of Benefits and Harms

The potential benefits of this guideline statement were viewed as far outweighing the potential harms. This recommendation is also consistent with the APA's *Practice Guidelines for the Psychiatric*

---

<sup>1</sup>Harms may include serious adverse events; less serious adverse events that affect tolerability; minor adverse events; negative effects of the intervention on quality of life; barriers and inconveniences associated with treatment; and other negative aspects of the treatment that may influence decision-making by the patient, the clinician, or both. Harms may also include opportunity costs for the clinician who may have to forgo another clinical activity that would be more beneficial for the patient.

*Evaluation of Adults*, 3rd Edition (American Psychiatric Association 2016a). The level of research evidence is rated as low because there is minimal research on the benefits and harms of assessing these aspects of history and examination as part of an initial assessment of a patient with BPD. Nevertheless, expert opinion suggests that conducting such assessments as part of the initial psychiatric evaluation improves diagnosis and treatment planning in individuals with BPD. For additional details, see the aforementioned practice guidelines. For additional discussion of the research evidence, see Appendix C, Statement 1.

## Differences of Opinion Among Writing Group Members

There were no differences of opinion. The writing group voted unanimously in favor of this recommendation.

## Review of Available Guidelines from Other Organizations

Other organizations' practice guidelines typically assume that an evaluation has occurred and that a diagnosis of BPD has been made. The National Institute for Health and Care Excellence (NICE; 2009) guideline also notes the importance of assessing comorbid mental disorders, social problems, psychosocial and occupational functioning, coping strategies, strengths and vulnerabilities, risks to self and others, and needs for psychological treatment, social care and support, occupational rehabilitation or development, and assistance addressing needs of dependent children.

## Quality Measurement Considerations

A detailed initial assessment of individuals with possible BPD is essential to verifying a diagnosis and establishing a comprehensive, patient-centered treatment plan. Nevertheless, it would be challenging to incorporate this recommendation into a performance-based quality measure given the breadth of content areas being assessed and the difficulty in ascertaining evaluation details from clinical charts or administrative data. However, quality-related efforts at the local level could assess whether EHR templates include prompts for documenting key elements of the assessment and whether such aspects of the evaluation are typically completed, while still allowing flexibility in the documentation of findings.

## Statement 2 – Quantitative Measures

APA *suggests* (2C) that the initial psychiatric evaluation of a patient with possible borderline personality disorder include a quantitative measure to identify and determine the severity of symptoms and impairments of functioning that may be a focus of treatment.

### Benefits

Use of a quantitative measure as part of the initial evaluation can have a number of benefits by establishing baseline information on the patient's symptom severity and associated impairment. As compared with a clinical interview, use of a quantitative measure may improve the consistency with which this information is obtained. When administered through paper-based or electronic self-report, use of quantitative measures may allow routine questions to be asked more efficiently. When used on a longitudinal basis, quantitative measures can minimize recall bias and help to determine whether treatment is having its intended effect or whether a shift in the treatment plan is needed to address symptoms, treatment-related side effects, level of distress, functioning impairments, or potential for harm to the patient or others. Ongoing use of quantitative assessments may also foster identification of residual symptoms or impairments and facilitate communication among treating clinicians.

## Harms

The harms of using a quantitative measure include the time required for administration and review. Overreliance on quantitative measures may lead to overlooking other aspects of the patient's symptoms and clinical presentation. Patients may also provide inaccurate information about their symptoms, such as minimizing symptom severity or frequency, leading to an underestimation of severity of illness. Reliance on inaccurate information can have a negative impact on clinical decision-making, including recommendations for treatment. Some patients may view quantitative measures as impersonal or may feel frustrated by having to complete detailed questionnaires, resulting in possible straining of patient-clinician rapport. Changes in the workflow of clinical practices and adjustments in staffing may be needed to incorporate quantitative measures into routine care. Modification of EHRs or use of other technologies may also be required to facilitate capture of quantitative measure data.

## Patient Preferences

Clinical experience suggests that most patients are cooperative with and accepting of quantitative measures as part of an initial or subsequent assessment. Most patients will be able to appreciate the ways in which the use of quantitative measures will benefit them. For example, in the testing of the DSM-5 Cross-Cutting Symptom Measure as part of the DSM-5 field trials, quantitative measures were found to be acceptable to patients (Clarke et al. 2014; Moscicki et al. 2013), and only a small fraction of individuals felt that measurement of symptoms would not be helpful to their treating clinician (Moscicki et al. 2013). The fact that the clinician is using a systematic approach to address the patients' symptoms and functioning may send a positive message that could improve the therapeutic relationship. Especially in developed countries, patients are used to and expect digital, computerized information exchange, including for health-related monitoring and communication. For these patients, the use of quantitative measures within the context of an EHR, mobile application, or other computerized technology may be more convenient.

## Balancing of Benefits and Harms

The potential benefits of this guideline statement were viewed as likely outweighing the potential harms. Quantitative measures of BPD symptoms have been used primarily in research settings, and no specific scale for rating BPD symptoms can be recommended over another. Nonetheless, expert opinion suggests that the use of quantitative measures in the assessment of patients with BPD could enhance clinical decision-making and improve treatment outcomes. This statement is also consistent with Guideline VII, "Quantitative Assessment," in APA's *Practice Guidelines for the Psychiatric Evaluation of Adults*, 3rd Edition (American Psychiatric Association 2016a). Although quantitative measures have been used for reporting purposes as well as research, the level of research evidence for this recommendation is rated as low because it remains unclear whether routine use of these scales in clinical practice improves overall outcomes. For additional discussion of the research evidence, see Appendix C, Statement 2.

## Differences of Opinion Among Writing Group Members

There were no differences of opinion. The writing group voted unanimously in favor of this recommendation.

## Review of Available Guidelines From Other Organizations

Other organizations' practice guidelines do not comment on the use of a quantitative measure, per se. However, several guidelines suggest that assessment include use of a structured or semistructured clinical interview that focuses on diagnosis of personality disorders (Simonsen et al. 2019).



## Quality Measurement Considerations

As a suggestion, this guideline statement is not appropriate for use as a performance-based quality measure or for incorporation into electronic decision support.

### Statement 3 – Treatment Planning

APA *recommends* (1C) that a patient with borderline personality disorder have a documented, comprehensive, and person-centered treatment plan.

#### Benefits

Development and documentation of a comprehensive, person-centered treatment plan ensures that the clinician has considered available treatment options in the context of individual patient needs, with a goal of improving overall outcome. It may also assist in forming a therapeutic relationship, eliciting patient preferences, permitting education about possible treatments, setting expectations for treatment, and establishing a framework for shared decision-making. Documentation of a treatment plan also promotes accurate communication among all those caring for the patient and can serve as a reminder of prior discussions about treatment.

#### Harms

The potential harms from this recommendation relate to the time spent in discussion and documentation of a comprehensive treatment plan that may reduce the opportunity to focus on other aspects of the evaluation.

#### Patient Preferences

Clinical experience suggests that patients are cooperative with and accepting of efforts to establish treatment plans, particularly when they are patient centered.

#### Balancing of Benefits and Harms

The potential benefits of this guideline statement were viewed as far outweighing the potential harms. The level of research evidence is rated as low because no information is available on the harms of a comprehensive, person-centered treatment plan. There is also minimal research on whether developing and documenting a specific treatment plan improves outcomes as compared with assessment and documentation as usual. However, indirect evidence, including expert opinion, supports the benefits of comprehensive treatment planning. For additional discussion of the research evidence, see Appendix C, Statement 3.

#### Differences of Opinion Among Writing Group Members

There were no differences of opinion. The writing group voted unanimously in favor of this recommendation.

#### Review of Available Guidelines from Other Organizations

The NICE guideline recommends development of comprehensive multidisciplinary care plans that include crisis planning, short-term treatment aims, approaches to management of comorbidities, and identification of long-term goals (National Institute for Health and Care Excellence 2009). The NICE and National Health and Medical Research Council guidelines also describe general aspects of treatment of BPD patients that are of relevance to treatment planning (National Health and Medical Research Council 2012; National Institute for Health and Care Excellence 2009).

## Quality Measurement Considerations

It is not known whether psychiatrists and other mental health professionals typically document a comprehensive and person-centered treatment plan, and there is likely to be variability. A quality measure could be developed to assess for the presence or absence of text in the medical record that would reflect treatment planning; however, clinical judgment would still be needed to determine whether a documented treatment plan is comprehensive and adapted to individual needs and preferences. Manual review of charts to evaluate for the presence of such a person-centered treatment plan would be burdensome and time-consuming to implement. Nevertheless, EHR note templates could include prompts to foster documentation of a patient-centered treatment plan, and local programs could engage in quality-related initiatives to improve aspects of treatment planning.

## Statement 4 – Discussion of Diagnosis and Treatment

APA *recommends* (1C) that a patient with borderline personality disorder be engaged in a collaborative discussion about their diagnosis and treatment, which includes psychoeducation related to the disorder.

### Benefits

Use of psychoeducation in patients with BPD has not been associated with a benefit in small non-representative research studies, but expert opinion suggests that disclosure of diagnosis and associated psychoeducation are beneficial to patients.

### Harms

The harms of psychoeducation are likely to be minimal on the basis of results from clinical trials in other psychiatric disorders that show no differences in the rate of harms experienced by individuals treated with psychoeducation as compared with usual care. It is possible that some individuals will not wish to know or would become upset by learning of their diagnosis, but this risk can be mitigated by collaborative and empathic discussion that includes the benefits of treatment.

### Patient Preferences

Disclosure and discussion of a diagnosis of BPD is typically preferred by patients (Sulzer et al. 2016), and patients feel that it helps them be more informed about treatment options (Proctor et al. 2021). In addition, clinical experience suggests that most patients are interested in receiving information about their diagnosis and potential treatments as part of their care as well as being accepting of more formal and systematic approaches to psychoeducation. However, some patients may not wish to participate in psychoeducation or may experience logistical barriers (e.g., time, access to transportation, childcare, costs) in attending psychoeducation sessions.

### Balancing of Benefits and Harms

The potential benefits of this guideline statement were viewed as far outweighing the potential harms. Although patient preferences may differ, any minimal harms of psychoeducation or disclosure of diagnostic information seem to be outweighed by potential benefits of understanding BPD and its treatment. For additional discussion of the research evidence, see Appendix C, Statement 4.

### Differences of Opinion Among Writing Group Members

There were no differences of opinion. The writing group voted unanimously in favor of this recommendation.

## Review of Available Guidelines from Other Organizations

Two guidelines from other organizations also emphasize the importance of disclosing the diagnosis of BPD to the patient and providing psychoeducation, with a particular emphasis on the availability of effective treatment (National Health and Medical Research Council 2012; National Institute for Health and Care Excellence 2009).

### Quality Measurement Considerations

This guideline statement may not be appropriate for a performance-based quality measure because of the diversity of psychoeducational approaches and services. In addition, providing information about the diagnosis of BPD and its treatment will likely span multiple visits. Furthermore, documentation of diagnostic disclosure and psychoeducation will typically occur in free text notes, which are difficult to track for quality measurement purposes. Reminders about psychoeducation are also not well suited to incorporation into EHR clinical decision support. However, health organizations and health plans may wish to implement quality improvement efforts to increase diagnostic disclosure and psychoeducation among individuals with BPD.

## Psychosocial Interventions

### Statement 5 – Psychotherapy

APA *recommends (1B)* that a patient with borderline personality disorder be treated with a structured approach to psychotherapy that has support in the literature and targets the core features of the disorder.

#### Benefits

Use of psychotherapy in the treatment of BPD is associated with improvements in functioning and reductions in BPD severity, general psychopathology, depression, impulsivity, and suicidal and other self-harming behaviors, although different psychotherapies show different patterns of treatment benefits (moderate strength of research evidence).

#### Harms

The harms of psychotherapy in the treatment of BPD are not well reported in the literature. However, the harms of an effective psychotherapy delivered by a well-trained and well-supervised psychotherapist appear to be small. In contrast, the use of a psychotherapy that lacks demonstrated benefits in BPD could prevent individuals from receiving effective psychotherapy in a timely fashion, thereby influencing prognosis. Other harms of psychotherapy have been noted in individual circumstances when an evidence-based therapy is not delivered in a rigorous and systematic fashion. Such harms may result from boundary violations, alienation from support systems, apparent recollection of false memories, and undue dependency on psychotherapy, among other iatrogenic harms. In patients who have experienced prior trauma, intense or premature exploration of these experiences can increase patient distress, exacerbate symptoms, and disrupt the therapeutic relationship.

#### Patient Preferences

Clinical experience suggests that most patients are accepting of psychotherapy as part of a treatment plan. A meta-analysis of patient treatment preferences among individuals with a psychiatric disorder suggests a preference for psychotherapy over pharmacotherapy, with this preference being more pronounced among females and younger individuals (McHugh et al. 2013). However, patients also

may have concerns about treatment cost or geographical availability that would influence their choice of psychotherapeutic approaches. In addition, some patients may prefer one type of psychotherapy over another based on personal experience or knowledge about a specific approach. Other patient and clinician factors may affect the therapeutic relationship and may also influence patient preferences.

## Balancing of Benefits and Harms

The potential benefits of this statement were viewed as far outweighing the potential harms. For additional discussion of the research evidence, see Appendix C, Statement 5. It was recognized that several psychotherapies have demonstrated efficacy in BPD. The harms of these treatments are not well studied but seem small when treatment is provided by well-trained professionals using a rigorous evidence-based therapy. However, no single psychotherapy can be recommended over other effective psychotherapies in BPD. In addition, efficacies overlap among treatments, and the effects of treatment vary for different outcomes. Furthermore, patient preferences for specific therapies may differ, and additional research evidence may influence our knowledge of effective psychotherapies for this condition. Thus, in balancing of benefits and harms, the guideline statement focuses on the use of an effective evidence-based psychotherapy for BPD rather than a specific psychotherapeutic modality.

## Differences of Opinion Among Writing Group Members

There were no differences of opinion. The writing group voted unanimously in favor of this recommendation.

## Review of Available Guidelines from Other Organizations

Other organizations' practice guidelines recommend use of structured psychotherapies that are intended to treat BPD (Canadian Agency for Drugs and Technologies in Health 2018; Finnish Medical Society Duodecim 2020; National Health and Medical Research Council 2012; Simonsen et al. 2019). Outpatient treatment frequencies of up to two sessions per week and adapted to the patient's needs are recommended (National Health and Medical Research Council 2012; National Institute for Health and Care Excellence 2009; Simonsen et al. 2019). Although the specific choice of a psychotherapy may depend on a number of factors including patient preference (National Health and Medical Research Council 2012; National Institute for Health and Care Excellence 2009), psychotherapies that are specifically recommended are dialectical behavior therapy (Canadian Agency for Drugs and Technologies in Health 2018; Finnish Medical Society Duodecim 2020; Herpertz et al. 2007; Simonsen et al. 2019), mentalization-based treatment (Canadian Agency for Drugs and Technologies in Health 2018; Finnish Medical Society Duodecim 2020; Herpertz et al. 2007; Simonsen et al. 2019), schema-focused therapy (Canadian Agency for Drugs and Technologies in Health 2018; Finnish Medical Society Duodecim 2020; Herpertz et al. 2007; Simonsen et al. 2019), and transference-focused psychotherapy (Herpertz et al. 2007; Simonsen et al. 2019). In females, dialectical behavior therapy is also recommended if treatment goals for BPD include reductions in self-harm (National Health and Medical Research Council 2012; National Institute for Health and Care Excellence 2009) or reductions in anger, anxiety, or depression (National Health and Medical Research Council 2012).

## Quality Measurement Considerations

This guideline statement may not be appropriate for a performance-based quality measure because of the diversity of effective psychotherapeutic approaches and variations in the availability of psychotherapies. Measurement of psychotherapy utilization using structured EHR or claims data would require codes for specific types of therapy, but Current Procedural Terminology (CPT) codes refer to psychotherapy in general terms. In addition, patients may be receiving psychotherapies that

include a mix of effective elements rather than rigid adherence to a specific psychotherapeutic approach, which would make it hard to specify use of a single modality. For these same reasons, reminders about psychotherapy would be difficult to incorporate into an EHR. In addition, most individuals with BPD are receiving some form of psychotherapy, and a gap in quality would need to be documented before pursuing additional quality measure development. Nevertheless, individual organizations and health plans may wish to implement programs to ensure that effective psychotherapies are being used to treat individuals with BPD.

## Pharmacotherapy

### Statement 6 – Clinical Review before Medication Initiation

APA *recommends* (1C) that a patient with borderline personality disorder have a review of co-occurring disorders, prior psychotherapies, other nonpharmacological treatments, past medication trials, and current medications before initiating any new medication.

#### Benefits

A review of co-occurring disorders, prior psychotherapies, other nonpharmacological treatments, past medication trials, and current medications has not been studied but is likely to be beneficial in assuring that the current treatment regimen is optimized prior to instituting a new medication. Such a review also increases awareness of possible medication interactions with the addition of a new medication and may raise the possibility of discontinuing other medications or shifting the psychotherapeutic approach.

#### Harms

The harms of reviewing co-occurring disorders, prior psychotherapies, other nonpharmacological treatments, past medication trials, and current medications prior to starting a new medication have not been studied but are expected to be small, if any. Nevertheless, it is possible that time used to conduct such a review could delay medication initiation or reduce time available to address other issues of importance to the patient or of relevance to treatment planning.

#### Patient Preferences

Although there is no specific evidence on patient preferences related to conducting such a review before starting a new medication, clinical experience suggests that most patients are cooperative with and accepting of careful consideration and discussion of treatment options.

#### Balancing of Benefits and Harms

The potential benefits of this guideline statement were viewed as far outweighing the potential harms. The level of research evidence is rated as low because there is minimal research on the benefits and harms of assessing these aspects of history prior to initiating a new medication. Nevertheless, expert opinion suggests that conducting such an assessment would enhance treatment planning and appropriateness of medication use in individuals with BPD. For additional details, see APA's *Practice Guidelines for the Psychiatric Evaluation of Adults*, 3rd Edition (American Psychiatric Association 2016a). For additional discussion of the research evidence, see Appendix C, Statement 6.

#### Differences of Opinion Among Writing Group Members

There were no differences of opinion. The writing group voted unanimously in favor of this recommendation.

## Review of Available Guidelines from Other Organizations

The NICE guideline does not specify the type of review that was needed prior to instituting a medication but does note the importance of ensuring that medication is not begun in lieu of more appropriate interventions (National Institute for Health and Care Excellence 2009).

## Quality Measurement Considerations

Reviewing co-occurring disorders, prior psychotherapies, other nonpharmacological treatments, past medication trials, and current medications prior to starting a new medication is likely to be beneficial to patients. Nevertheless, it would be challenging to incorporate this recommendation into a performance-based quality measure given the breadth of content areas being assessed and the difficulty in ascertaining evaluation details from clinical charts or administrative data. However, quality-related efforts at the local level could assess whether EHR templates include prompts for documenting key elements of the assessment and whether such aspects of the evaluation are typically completed, while still allowing flexibility in the documentation of findings.

## Statement 7 – Pharmacotherapy Principles

APA *suggests* (2C) that any psychotropic medication treatment of borderline personality disorder be time-limited, aimed at addressing a specific measurable target symptom, and adjunctive to psychotherapy.

### Benefits

Benefits of psychotropic medications in studies of BPD are modest (low strength of evidence) and inconsistent. Therapeutic benefits may be present for some patients that were not found in aggregated data from clinical trials, but the limitations of the evidence suggest that psychotropic medications should be used judiciously in BPD, with a reliance on psychotherapy as a primary therapeutic modality. A focus on time-limited treatment that addresses a specific measurable target symptom is beneficial to ensuring that treatment response will be assessed and the time of exposure to medication is minimized and dependent on clinical response.

### Harms

The harms of psychotropic medication in the treatment of BPD are, in part, dependent on the side effect profile of the specific medication. In addition, patients may view psychotropic medications as a way to address intense feelings and emotions without engaging in the essential process of psychotherapy. The focus on time-limited treatment that addresses a specific measurable target symptom could potentially reduce long-term or nonspecific use of a medication in a patient who may otherwise benefit from it.

### Patient Preferences

Clinical experience suggests that most patients would prefer to minimize use of psychotropic medications due to adverse effects, costs, and other factors. Many patients, particularly women and younger individuals, prefer psychotherapy to medications (McHugh et al. 2013). However, in some circumstances, patients may request medications to address specific symptoms or general experiences of distress. Some patients may also prefer one medication over another medication on the basis of prior treatment experiences or other factors.

### Balancing of Benefits and Harms

The potential benefits of this guideline statement were viewed as likely outweighing the potential harms. Although the recommended approach has not been specifically studied, the harms of using psy-

chotropic medications in a time-limited, symptom-focused manner seem small compared with the benefits. Also, the benefits of psychotherapy clearly outweigh the benefits of psychotropic medications, and the harms of psychotherapy are likely to be less than those of pharmacotherapy, particularly when the psychotherapy is evidence-based and conducted by well-trained and well-supervised psychotherapists. For additional discussion of the research evidence, see Appendix C, Statements 5 and 7.

## Differences of Opinion Among Writing Group Members

There were no differences of opinion. The writing group voted unanimously in favor of this recommendation.

## Review of Available Guidelines from Other Organizations

Guidelines from other organizations also note that psychotropic medications should be used as adjuncts to psychotherapy and that use should be time-limited (National Health and Medical Research Council 2012; National Institute for Health and Care Excellence 2009; Simonsen et al. 2019). The British BPD guideline recommends that the use of sedatives be time-limited (National Institute for Health and Care Excellence 2009), whereas other guidelines recommend avoiding the use of benzodiazepines in individuals with BPD (Finnish Medical Society Duodecim 2020; Herpertz et al. 2007; Simonsen et al. 2019). Several guidelines note that use should be symptom-focused (Herpertz et al. 2007; National Health and Medical Research Council 2012; National Institute for Health and Care Excellence 2009) or intended to address co-occurring disorders (Simonsen et al. 2019).

## Quality Measurement Considerations

This guideline statement would be difficult to incorporate into a meaningful performance-based quality measure. Although adjunctive use of psychotropic medications could be documented, it would be challenging to extract information from clinical documentation on whether medication was time-limited and symptom-focused in its use. By the same token, this statement would not be appropriate for use in clinical decision support in EHRs.

## Statement 8 – Pharmacotherapy Review

APA *recommends* (1C) that a patient with borderline personality disorder receive a review and reconciliation of their medications at least every 6 months to assess the effectiveness of treatment and identify medications that warrant tapering or discontinuation.

### Benefits

The benefits of a review and reconciliation of medications include ensuring that a complete list of medications is maintained and that potential medication interactions are identified. In addition, such a review can identify medications that may warrant dosage reduction or discontinuation as well as medications for which dosage optimization is needed or laboratory monitoring is indicated (e.g., serum levels, metabolic studies).

### Harms

The harms of medication review and reconciliation have not been studied but are likely to be small and related to time requirements.

### Patient Preferences

No information is available on patient preferences related to medication review and reconciliation, but clinical experience suggests that patients are accepting and appreciative of review and discussion of treatment.

## Balancing of Benefits and Harms

The potential benefits of this guideline statement were viewed as far outweighing the potential harms, although evidence is limited. In addition, medication reconciliation and deprescribing, where indicated, are recommended best practices in hospital as well as outpatient settings (Institute for Safe Medication Practice 2023; The Joint Commission 2022).

## Differences of Opinion Among Writing Group Members

There were no differences of opinion. The writing group voted unanimously in favor of this recommendation.

## Review of Available Guidelines from Other Organizations

Two other guidelines recommend periodic review of pharmacotherapies in patients with BPD with goals of tapering and discontinuing unneeded medications and avoiding polypharmacy (National Institute for Health and Care Excellence 2009; Simonsen et al. 2019).

## Quality Measurement Considerations

As a recommended best practice in hospital as well as outpatient settings, medication reconciliation is already incorporated into other quality-related measures in the United States (Institute for Safe Medication Practice 2023; The Joint Commission 2022). The addition of a measure that is specific to BPD would not be indicated.





# Evidence Tables for Additional Studies Reviewed

## Repetitive Transcranial Magnetic Stimulation Versus Sham

**TABLE G-1. Study characteristics and main results of rTMS compared with sham**

| Author (year) and/or trial name | Study characteristics                                                                                                           | Participants, <i>N</i> ; interventions; duration                                                                                                            | Study population, including main inclusion and exclusion criteria                                                                                                  | Sample demographics                                                    | Primary outcome; main results; attrition                                                                                                                                                          | Risk of bias |
|---------------------------------|---------------------------------------------------------------------------------------------------------------------------------|-------------------------------------------------------------------------------------------------------------------------------------------------------------|--------------------------------------------------------------------------------------------------------------------------------------------------------------------|------------------------------------------------------------------------|---------------------------------------------------------------------------------------------------------------------------------------------------------------------------------------------------|--------------|
| Cailhol et al. (2014)           | Design: Double-blinded RCT<br>Setting: Outpatient, single center<br>Country: France<br>Funding: University Hospital of Toulouse | <i>N</i> =9<br>G1 (4): Sham rTMS<br>G2 (5): rTMS frequency: 10 Hz, 80% of motor threshold, total 2,000 pulses per session; 10 sessions<br>Duration: 2 weeks | Inclusion: Ages 20–45 years; DSM-IV and DIB-R criteria for BPD<br>Exclusion: Bipolar I disorder, alcohol dependency, current MDE or PTSD; contraindication to rTMS | Mean age, years ( <i>SD</i> ): NR<br>Female: 89%<br>Race/ethnicity: NR | Primary outcome: BPDSI at 3 months<br>No significant differences in BPDSI, MADRS, SCL-90, GAS<br>Incidence of AEs: NR<br>Withdrawal due to AEs: NR<br>Attrition: 0%<br>Differential attrition: 0% | Moderate     |

AE=adverse event; BPD=borderline personality disorder; BPDSI=Borderline Personality Disorder Severity Index; DIB-R=Diagnostic Interview for Borderlines–Revised; DSM-IV=*Diagnostic and Statistical Manual of Mental Disorders*, 4th Edition; G1=Group 1; G2=Group 2; GAS=Global Assessment Scale; Hz=hertz; MADRS: Montgomery-Åsberg Depression Scale; MDE=major depressive episode; *N*=sample size; NR=not reported; PTSD=posttraumatic stress disorder; RCT=randomized controlled trial; rTMS=repetitive transcranial magnetic stimulation; SCL-90=Symptom Checklist-90; SD=standard deviation.

# Abandonment Psychotherapy Versus Treatment as Usual

**TABLE G-2. Study characteristics and main results of AP compared with TAU**

| Author (year) and/or trial name | Study characteristics                                                                    | Participants, <i>N</i> ; interventions; duration                                                                                                                                                                                               | Study population, including main inclusion and exclusion criteria                                                                                                                 | Sample demographics                                                           | Primary outcome; main results; attrition                                                                                                                                                                                                                                                                                                                                                                                                                                                                                                                        | Risk of bias |
|---------------------------------|------------------------------------------------------------------------------------------|------------------------------------------------------------------------------------------------------------------------------------------------------------------------------------------------------------------------------------------------|-----------------------------------------------------------------------------------------------------------------------------------------------------------------------------------|-------------------------------------------------------------------------------|-----------------------------------------------------------------------------------------------------------------------------------------------------------------------------------------------------------------------------------------------------------------------------------------------------------------------------------------------------------------------------------------------------------------------------------------------------------------------------------------------------------------------------------------------------------------|--------------|
| Andreoli et al. (2016)          | Design: RCT<br>Setting: Outpatient, single center<br>Country: Switzerland<br>Funding: NR | <i>N</i> =170<br>G1 (30): TAU: intensive community treatment<br>G2 (70): Manualized AP:<br>Two sessions per week delivered by nurses with experience in management of patients with BPD, plus antidepressant medications<br>Duration: 3 months | Inclusion: Ages 18–60 years; DSM-IV BPD and MDD diagnoses<br>Exclusion: DSM-IV psychotic disorder, bipolar I disorder, SUD, or intellectual disability; inability to speak French | Mean age, years ( <i>SD</i> ): 32 (10.1)<br>Female: 84%<br>Race/ethnicity: NR | Primary outcome: Suicidal relapse, rehospitalization, clinical remission (GAS >60) at 3 months<br>G2 significantly more effective than G1 to reduce suicidal relapse (12.9% vs. 40.0%, <i>P</i> <0.005) and rehospitalization (14.3% vs. 36%, <i>P</i> <0.01), to achieve 50% reduction in Ham-D (65.7% vs. 33.3%, <i>P</i> <0.005), and improve GAS (62.7 vs. 36.7, <i>P</i> <0.01)<br>Incidence of AEs:<br>G1: 100% (30/30)<br>G2: 100% (70/70)<br>Withdrawal due to AEs: NR<br>Attrition: 12%<br>Differential attrition:<br>G1: 37% (11/30)<br>G2: 6% (4/70) | Moderate     |

AE=adverse event; AP=abandonment psychotherapy; BPD=borderline personality disorder; DSM-IV=*Diagnostic and Statistical Manual of Mental Disorders*, 4th Edition; G1=Group 1; G2=Group 2; GAS=Global Assessment Scale; Ham-D=Hamilton Rating Scale for Depression; MDD=major depressive disorder; *N*=sample size; NR=not reported; RCT=randomized controlled trial; SD=standard deviation; SUD=substance use disorder; TAU=treatment as usual.

# Schema-Focused Therapy Versus Treatment as Usual

**TABLE G-3. Study characteristics and main results of SFT compared with TAU**

| Author (year) and/or trial name | Study characteristics                                                                                  | Participants, <i>N</i> ; interventions; duration                                                                                                                                                                                                                                                                                                                                                                                                                                                                         | Study population, including main inclusion and exclusion criteria                                                                                                                                                                                                                     | Sample demographics                                                                                           | Primary outcome; main results; attrition                                                                                                                                                                                                                                                                                                                                                                                                                                                 | Risk of bias |
|---------------------------------|--------------------------------------------------------------------------------------------------------|--------------------------------------------------------------------------------------------------------------------------------------------------------------------------------------------------------------------------------------------------------------------------------------------------------------------------------------------------------------------------------------------------------------------------------------------------------------------------------------------------------------------------|---------------------------------------------------------------------------------------------------------------------------------------------------------------------------------------------------------------------------------------------------------------------------------------|---------------------------------------------------------------------------------------------------------------|------------------------------------------------------------------------------------------------------------------------------------------------------------------------------------------------------------------------------------------------------------------------------------------------------------------------------------------------------------------------------------------------------------------------------------------------------------------------------------------|--------------|
| Farrell et al. (2009)           | Design: RCT<br>Setting: Outpatient, multicenter<br>Country: United States<br>Funding: Government, NIMH | <i>N</i> =32<br>G1 (16): TAU: Weekly individual psychotherapy in community<br>G2 (16): SFT plus TAU: 30 weekly group sessions, each lasting 90 minutes; combination of emotional awareness training, BPD psychoeducation, distress management training, and schema-focused change work; sessions consisted of discussing homework from previous session, presenting new information, a question-and-answer session, experiential or cognitive work, and homework assignment<br>Duration: 8 months<br>Follow-up: 6 months | Inclusion: Females; age 18–65 years; met criteria for BPD from DIPD-R and BSI; in individual psychotherapy of ≥6 months duration and stable<br>Exclusion: Axis I diagnosis of psychotic disorder or presence of psychosis; below-average IQ (89) on Shipley Institute of Living Scale | Mean age, <i>years</i> ( <i>SD</i> ):<br>G1: 36 (8.08)<br>G2: 35 (9.30)<br>Female: 100%<br>Race/ethnicity: NR | Primary outcome: NR<br>G2 significantly more effective than G1 at 14-month follow-up (6 months after end of treatment) for BPD diagnosis (measured by DIB-R; 0% vs. 83%, $P<0.001$ ), BPD symptoms (measured by BSI; 15.75 vs. 33.08, $P<0.001$ ), global severity of psychiatric symptoms (measured by SCL-90; 0.96 vs. 1.93, $P<0.001$ ), and improved global functioning (measured by GAF; 66.19 vs. 48.25, $P<0.001$ )<br>Attrition: 12.5% (4/32)<br>G1: 25% (4/16)<br>G2: 0% (0/16) | Moderate     |

**TABLE G-3. Study characteristics and main results of SFT compared with TAU (continued)**

| Author (year) and/or trial name | Study characteristics                                                              | Participants, <i>N</i> ; interventions; duration                                                                                                                                                                                                                                                                                                                                                                                                                                                                                                                                                                                   | Study population, including main inclusion and exclusion criteria                                                                                                                                                                                                                                                                                                                                                                                                                                                                                                                        | Sample demographics                                                                                        | Primary outcome; main results; attrition                                                                                                                              | Risk of bias |
|---------------------------------|------------------------------------------------------------------------------------|------------------------------------------------------------------------------------------------------------------------------------------------------------------------------------------------------------------------------------------------------------------------------------------------------------------------------------------------------------------------------------------------------------------------------------------------------------------------------------------------------------------------------------------------------------------------------------------------------------------------------------|------------------------------------------------------------------------------------------------------------------------------------------------------------------------------------------------------------------------------------------------------------------------------------------------------------------------------------------------------------------------------------------------------------------------------------------------------------------------------------------------------------------------------------------------------------------------------------------|------------------------------------------------------------------------------------------------------------|-----------------------------------------------------------------------------------------------------------------------------------------------------------------------|--------------|
| Leppänen et al. (2016)          | Design: RCT<br>Setting: Outpatient, multicenter<br>Country: Finland<br>Funding: NR | <i>N</i> =71<br>G1 (47): TAU; treatment in accordance with current practices of Oulu city mental health care services; treatments vary widely, from supportive weekly psychotherapy sessions to visits every few weeks and from occasional appointments for medication control to home rehabilitation<br>G2 (24): SFT-based psychoeducational group integrated into individual therapy: 45- to 60-minute individual therapy sessions once a week, a total of forty 90-minute psychoeducational group sessions (approximately once a week), and materials for patients to practice therapy exercises at home<br>Duration: 12 months | Inclusion: Age ≥20 years; fulfilled SCID-II criteria for BPD; severe symptoms of BPD, including parasuicidal behavior (e.g., cutting, other forms of self-harm, impulsive overdosing of medicines); attempted suicide; considerable emotional instability affecting social and professional life; previous unsuccessful treatments (one or more)<br>Exclusion: Schizophrenia spectrum diseases/psychoses, bipolar disorder (type I), neuropsychiatric disorder, severe substance abuse problem, Axis I disorders diagnosed according to SCID-I, or presence of neuropsychiatric disorder | Mean age, <i>years</i> ( <i>SD</i> ):<br>G1: 32 (8.8)<br>G2: 32 (8.3)<br>Female: 86%<br>Race/ethnicity: NR | Primary outcome: Borderline symptoms on BPDSI-IV<br>No difference between groups on BPD outcomes<br>Attrition: 26.8% (19/71)<br>G1: 31.9% (15/47)<br>G2: 16.7% (4/24) | High         |

**TABLE G-3. Study characteristics and main results of SFT compared with TAU (continued)**

| Author (year) and/or trial name | Study characteristics                                                                                          | Participants, <i>N</i> ; interventions; duration                                                                                                                                                                                                                 | Study population, including main inclusion and exclusion criteria                                                                                                                                                                                                                              | Sample demographics                                                                                        | Primary outcome; main results; attrition                                                                                                                                                        | Risk of bias |
|---------------------------------|----------------------------------------------------------------------------------------------------------------|------------------------------------------------------------------------------------------------------------------------------------------------------------------------------------------------------------------------------------------------------------------|------------------------------------------------------------------------------------------------------------------------------------------------------------------------------------------------------------------------------------------------------------------------------------------------|------------------------------------------------------------------------------------------------------------|-------------------------------------------------------------------------------------------------------------------------------------------------------------------------------------------------|--------------|
| Hilden et al. (2021)            | Design: RCT<br>Setting: Outpatient, single center<br>Country: Finland<br>Funding: Helsinki University Hospital | <i>N</i> =42<br>G1 (14): TAU; psychiatrist visits and 45-minute therapy sessions once monthly; both pharmacotherapy and some form of psychosocial support or psychotherapy for most patients<br>G2 (28): SFT; 20 weekly 90-minute sessions<br>Duration: 20 weeks | Inclusion: Adults; BPD using DSM-IV SCID-II criteria (included those who had previously received treatment)<br>Exclusion: Psychotic symptoms, suicide risk, principal diagnosis of uncontrollable SUD, or illness or symptoms affecting participation; those undergoing specific psychotherapy | Mean age, <i>years</i> ( <i>SD</i> ):<br>G1: 27 (3.7)<br>G2: 31 (8.8)<br>Female: 83%<br>Race/ethnicity: NR | Primary outcome: Intra-individual change in borderline personality symptoms<br>No difference between groups on BPD outcomes<br>Attrition: 16.7% (7/42)<br>G1: 14.3% (2/14)<br>G2: 17.97% (5/28) | Moderate     |

BPD=borderline personality disorder; BPDSI-IV=Borderline Personality Disorder Severity Index-IV; BSI=Borderline Syndrome Index; DIB-R=Diagnostic Interview for Borderlines-Revised; DIPD-R=Diagnostic Interview for Personality Disorders-Revised; DSM-IV=*Diagnostic and Statistical Manual of Mental Disorders*, 4th Edition; G1=Group 1; G2=Group 2; GAF=Global Assessment of Functioning; IQ=intelligence quotient; *N*=sample size; NIMH=National Institute of Mental Health; NR=not reported; RCT=randomized controlled trial; SCID-I=Structured Clinical Interview for DSM-IV Axis I Disorders; SCID-II=Structured Clinical Interview for DSM-IV Axis II Disorders; SCL-90=Symptom Checklist-90; SD=standard deviation; SFT=schema-focused therapy; SUD=substance use disorder; TAU=treatment as usual.

# Schema-Focused Therapy Versus Schema-Focused Therapy With Extra Phone Support

**TABLE G-4. Study characteristics and main results of SFT alone compared with SFT with extra phone support**

| Author (year) and/or trial name | Study characteristics                                                                                                      | Participants, <i>N</i> ; interventions; duration                                                                                                                                                                                  | Study population, including main inclusion and exclusion criteria                                                                                                                                                                                                            | Sample demographics                                                                                                  | Primary outcome; main results; attrition                                                                                                                                                                                                                                                                                                                                                                                                                         | Risk of bias |
|---------------------------------|----------------------------------------------------------------------------------------------------------------------------|-----------------------------------------------------------------------------------------------------------------------------------------------------------------------------------------------------------------------------------|------------------------------------------------------------------------------------------------------------------------------------------------------------------------------------------------------------------------------------------------------------------------------|----------------------------------------------------------------------------------------------------------------------|------------------------------------------------------------------------------------------------------------------------------------------------------------------------------------------------------------------------------------------------------------------------------------------------------------------------------------------------------------------------------------------------------------------------------------------------------------------|--------------|
| Nadort et al. (2009)            | Design: RCT<br>Setting: Outpatient, multicenter<br>Country: The Netherlands<br>Funding: Other, public benefit organization | <i>N</i> =62<br>G1 (30): 45-minute sessions of SFT twice a week in year 1 and once a week in year 2<br>G2 (32): 45-minute sessions of SFT twice a week along with extra phone support outside office hours<br>Duration: 18 months | Inclusion: Ages 18–60 years; DSM-IV BPD diagnosis; BPDSI-IV score > 20<br>Exclusion: Psychotic disorders, bipolar disorder, DID, ASPD, or ADHD; addiction of such severity that clinical detoxification was indicated; psychiatric disorders secondary to medical conditions | Mean age, <i>years</i> ( <i>SD</i> ):<br>G1: 32.13 (9.01)<br>G2: 31.81 (9.24)<br>Female: 96.8%<br>Race/ethnicity: NR | Primary outcome: BPDSI-IV at 18 months<br>No significant differences between G1 and G2 on BPD severity and burden as well as outcomes of global psychological problems, quality of life, and dysfunction<br>Incidence of AEs: NR<br>Withdrawal due to AEs:<br>G1: 0% (0/30)<br>G2: 3% (1/32; suicide after treatment allocation, but before treatment additional crisis support was provided)<br>Attrition: 21%<br>Differential attrition: ≤10 percentage points | Moderate     |

ADHD=attention-deficit/hyperactivity disorder; AE=adverse event; ASPD=antisocial personality disorder; BPD=borderline personality disorder; BPDSI-IV=Borderline Personality Disorder Severity Index-IV; DID=dissociative identity disorder; DSM-IV=*Diagnostic and Statistical Manual of Mental Disorders*, 4th Edition; G1=Group 1; G2=Group 2; *N*=sample size; NR=not reported; RCT=randomized controlled trial; SD=standard deviation; SFT=schema-focused therapy.

## Cognitive Rehabilitation Versus Psychoeducation

TABLE G-5. Study characteristics and main results of CR compared with psychoeducation

| Author (year) and/or trial name | Study characteristics                                                                                                                                                                                               | Participants, <i>N</i> ; interventions; duration                                                                                  | Study population, including main inclusion and exclusion criteria                                                                                                                                                                                                                                                                                                                                                               | Sample demographics                                                                           | Primary outcome; main results; attrition                                                                                                                                                                                                                                                                             | Risk of bias |
|---------------------------------|---------------------------------------------------------------------------------------------------------------------------------------------------------------------------------------------------------------------|-----------------------------------------------------------------------------------------------------------------------------------|---------------------------------------------------------------------------------------------------------------------------------------------------------------------------------------------------------------------------------------------------------------------------------------------------------------------------------------------------------------------------------------------------------------------------------|-----------------------------------------------------------------------------------------------|----------------------------------------------------------------------------------------------------------------------------------------------------------------------------------------------------------------------------------------------------------------------------------------------------------------------|--------------|
| Pascual et al. (2015)           | Design: RCT<br>Setting: Outpatient, multicenter<br>Country: Spain<br>Funding: Government, Centro de Investigación Biomédica en Red de Salud Mental, Instituto de Salud Carlos III, Fondo de Investigación Sanitaria | <i>N</i> =70<br>G1 (36): CR; twice-weekly group sessions<br>G2 (34): Psychoeducation; weekly group sessions<br>Duration: 16 weeks | Inclusion: Ages 18–45 years; outpatient; BPD diagnosis according to DSM-IV-TR and evaluated by SCID-II and DIB-R; CGI-BPD >4; GAF <65<br>Exclusion: Severe physical conditions that could affect neuropsychological performance; IQ <85; MDD or substance misuse within past 6 months; schizophrenia, severe psychotic disorder, or bipolar disorder; previous participation in any psychoeducation or cognitive rehabilitation | Mean age, years (SD):<br>G1: 32 (6.04)<br>G2: 33 (8.8)<br>Female: 74.3%<br>Race/ethnicity: NR | Primary outcome: Psychosocial functioning at 6 months<br>No significant difference between G1 and G2 on psychosocial functioning including on BSL-23, FAST, BIS, Ham-A, or MADRS at 6 months<br>Incidence of AEs: NR<br>Withdrawal due to AEs: NR<br>Attrition: 40%<br>Differential attrition: <10 percentage points | High         |

AE=adverse event; BIS=Barratt Impulsiveness Scale; BPD=borderline personality disorder; BSL-23=Borderline Symptom List-23; CGI-BPD=Clinical Global Impression Scale for Borderline Personality Disorder; CR=cognitive rehabilitation; DIB-R=Diagnostic Interview for Borderlines-Revised; DSM-IV-TR=*Diagnostic and Statistical Manual of Mental Disorders*, 4th Edition, Text Revision; FAST=Functioning Assessment Scale Test; G1=Group 1; G2=Group 2; GAF=Global Assessment of Functioning; Ham-A=Hamilton Rating Scale for Anxiety; IQ=intelligence quotient; MADRS=Montgomery-Åsberg Depression Rating Scale; MDD=major depressive disorder; *N*=sample size; NR=not reported; RCT=randomized controlled trial; SCID-II=Structured Clinical Interview for DSM-IV Axis II Disorders; SD=standard deviation.



# Cognitive Therapy Versus Rogerian Supportive Therapy

**TABLE G-6. Study characteristics and main results of CT compared with RST**

| Author (year) and/or trial name | Study characteristics                                                                | Participants, <i>N</i> ; interventions; duration                                                                                                                                                                  | Study population, including main inclusion and exclusion criteria                                                                                                                                                                                                                                                | Sample demographics                                                                                        | Primary outcome; main results; attrition                                                                                                                                                                                                                                                                                                                                                                       | Risk of bias |
|---------------------------------|--------------------------------------------------------------------------------------|-------------------------------------------------------------------------------------------------------------------------------------------------------------------------------------------------------------------|------------------------------------------------------------------------------------------------------------------------------------------------------------------------------------------------------------------------------------------------------------------------------------------------------------------|------------------------------------------------------------------------------------------------------------|----------------------------------------------------------------------------------------------------------------------------------------------------------------------------------------------------------------------------------------------------------------------------------------------------------------------------------------------------------------------------------------------------------------|--------------|
| Cottraux et al. (2009)          | Design: RCT<br>Setting: Outpatient, multicenter<br>Country: France<br>Funding: Other | <i>N</i> =65<br>G1 (32): Weekly individual RST for 6 months then biweekly individual RST for 6 months<br>G2 (33): Weekly individual CT for 6 months then biweekly individual RST for 6 months<br>Duration: 1 year | Inclusion: DSM-IV BPD diagnosis (confirmed by DIB-R score of $\geq 8$ )<br>Exclusion: Age <18 or >60 years; living too far from centers; psychotic disorders with current delusions; significant drug or alcohol addiction in foreground; antisocial behaviors; not following psychotherapy at time of the study | Mean age, years ( <i>SD</i> ):<br>G1: 32.6 (8.3)<br>G2: 34.3 (10.2)<br>Female: 76.9%<br>Race/ethnicity: NR | Primary outcome: Combined response (score $\leq 3$ on CGI and Hopelessness score <8) at 24 weeks<br>No significant differences between G1 and G2 on CGI-I, Hopelessness scale, Ham-D, or BAI at 24 weeks<br>G2 significant improvement in BDI scores at 24 weeks (13.0 vs. 21.7, $P=0.01$ )<br>Harms: NR<br>Attrition:<br>Week 24: 22%<br>Week 104: 68%<br>Differential attrition: $\leq 10$ percentage points | Moderate     |

BAI=Beck Anxiety Inventory; BDI=Beck Depression Inventory; BPD=borderline personality disorder; CGI=Clinical Global Impression Scale; CGI-I=Clinical Global Impression-Improvement; CT=cognitive therapy; DIB-R=Diagnostic Interview for Borderlines-Revised; DSM-IV=*Diagnostic and Statistical Manual of Mental Disorders*, 4th Edition; G1=Group 1; G2=Group 2; Ham-D=Hamilton Rating Scale for Depression; *N*=sample size; NR=not reported; RCT=randomized controlled trial; RST=Rogerian supportive therapy; SD=standard deviation.

# Motive-Oriented Therapeutic Relationship Versus General Psychiatric Management

**TABLE G-7. Study characteristics and main results of MOTR compared with GPM**

| Author (year) and/or trial name | Study characteristics                                                                    | Participants, <i>N</i> ; interventions; duration                                                                                                                                        | Study population, including main inclusion and exclusion criteria                                                                                                                                                                                                                                                                                                              | Sample demographics                                                            | Primary outcome; main results; attrition                                                                                                                                                                                                                                    | Risk of bias |
|---------------------------------|------------------------------------------------------------------------------------------|-----------------------------------------------------------------------------------------------------------------------------------------------------------------------------------------|--------------------------------------------------------------------------------------------------------------------------------------------------------------------------------------------------------------------------------------------------------------------------------------------------------------------------------------------------------------------------------|--------------------------------------------------------------------------------|-----------------------------------------------------------------------------------------------------------------------------------------------------------------------------------------------------------------------------------------------------------------------------|--------------|
| Kramer et al. (2011)            | Design: RCT<br>Setting: Outpatient, single center<br>Country: Switzerland<br>Funding: NR | <i>N</i> =25<br>G1 (14): 10 session TAU with manual-based psychiatric and psychotherapeutic approach<br>G2 (11): 10 sessions of MOTR along with TAU<br>Duration: Seven therapy sessions | Inclusion: Ages 16–60 years; DSM-IV BPD diagnosis; speaks fluent French<br>Exclusion: Organic disorder or persistent substance abuse or dependence that might affect brain function; psychotic disorder implying pronounced break in reality testing, including schizophrenia, delusional disorder, and bipolar I disorder; acute risk of suicide; severe cognitive impairment | Mean age, years ( <i>SD</i> ): 31 (10.59)<br>Female: 77%<br>Race/ethnicity: NR | Primary outcome: Psychotherapeutic results on OQ-45 after seven therapy sessions<br>No significant differences between G1 and G2 on psychotherapeutic results after seven therapy sessions<br>Attrition: 42%<br>Differential attrition:<br>G1: 57% (8/14)<br>G2: 18% (2/11) | High         |

**TABLE G-7. Study characteristics and main results of MOTR compared with GPM (continued)**

| Author (year) and/or trial name | Study characteristics                                                                                                               | Participants, <i>N</i> ; interventions; duration                                                                                | Study population, including main inclusion and exclusion criteria                                                                       | Sample demographics                                                                                             | Primary outcome; main results; attrition                                                                                                                                                                                                                                                                   | Risk of bias |
|---------------------------------|-------------------------------------------------------------------------------------------------------------------------------------|---------------------------------------------------------------------------------------------------------------------------------|-----------------------------------------------------------------------------------------------------------------------------------------|-----------------------------------------------------------------------------------------------------------------|------------------------------------------------------------------------------------------------------------------------------------------------------------------------------------------------------------------------------------------------------------------------------------------------------------|--------------|
| Kramer et al. (2014)            | Design: RCT<br>Setting: Outpatient, single center<br>Country: Switzerland<br>Funding: Government, Swiss National Science Foundation | <i>N</i> =85<br>G1 (43): 10 sessions of GPM<br>G2 (42): 10 sessions of GPM plus MOTR use of plan analysis<br>Duration: 3 months | Inclusion: Ages 18–65 years; DSM-IV BPD diagnosis<br>Exclusion: DSM-IV psychotic disorders, intellectual disability, or substance abuse | Mean age, <i>years</i> ( <i>SD</i> ):<br>G1: 31 (11.00)<br>G2: 35 (9.97)<br>Female: 68.9%<br>Race/ethnicity: NR | Primary outcome: Psychotherapeutic results on OQ-45 at 3 months<br>G2 significantly greater improvement on OQ-45 at 3 months (76.0 vs. 86.1, <i>P</i> <0.01)<br>No significant differences between G1 and G2 on IIP and BSL at 3 months<br>Attrition: 29%<br>Differential attrition: ≤10 percentage points | Moderate     |

BPD=borderline personality disorder; BSL=Borderline Symptom List; DSM-IV=*Diagnostic and Statistical Manual of Mental Disorders*, 4th Edition; G1=Group 1; G2=Group 2; GPM=general psychiatric management; IIP=Inventory of Interpersonal Problems; MOTR=motive-oriented therapeutic relationship; *N*=sample size; NR=not reported; OQ-45=Outcome Questionnaire-45; RCT=randomized controlled trial; SD=standard deviation; TAU=treatment as usual.

# Psychoanalytic-Interactional Therapy Versus Psychodynamic Therapy by Experts

**TABLE G-8. Study characteristics and main results of PIT compared with E-PDT**

| Author (year) and/or trial name | Study characteristics                                                                  | Participants, <i>N</i> ; interventions; duration                                                                                                                                                                                                                                                                                                                                                                                                                                                                                                                                                                                             | Study population, including main inclusion and exclusion criteria                                                                                                                                                                                                                       | Sample demographics                                                                                                        | Primary outcome; main results; attrition                                                                                                                                                                                                                                                                                                                                                                                                                                                                                                                                                                                                                                                                                                                        | Risk of bias |
|---------------------------------|----------------------------------------------------------------------------------------|----------------------------------------------------------------------------------------------------------------------------------------------------------------------------------------------------------------------------------------------------------------------------------------------------------------------------------------------------------------------------------------------------------------------------------------------------------------------------------------------------------------------------------------------------------------------------------------------------------------------------------------------|-----------------------------------------------------------------------------------------------------------------------------------------------------------------------------------------------------------------------------------------------------------------------------------------|----------------------------------------------------------------------------------------------------------------------------|-----------------------------------------------------------------------------------------------------------------------------------------------------------------------------------------------------------------------------------------------------------------------------------------------------------------------------------------------------------------------------------------------------------------------------------------------------------------------------------------------------------------------------------------------------------------------------------------------------------------------------------------------------------------------------------------------------------------------------------------------------------------|--------------|
| Leichsenring et al. (2016)      | Design: RCT<br>Setting: Inpatient, single center<br>Country: Germany<br>Funding: Other | <i>N</i> =168<br>G1 (46): WL/TAU; 80% of patients continued usual treatment and remainder did not receive any treatment during WL period<br>G2 (64): PIT; one or two weekly individual sessions and three weekly group therapy sessions; art or body therapy and consultations with a social worker (on needs basis)<br>G3 (58): E-PDT; one or two weekly sessions of non-manualized individual therapy and three weekly sessions of group therapy; art or body therapy and consultations with a social worker (on needs basis)<br>Mean duration, <i>days</i> ( <i>SD</i> ):<br>G1: 89.69 (105.31)<br>G2: 106.7 (41.71)<br>G3: 76.78 (21.07) | Inclusion: Ages 18–65 years; Cluster B personality disorder diagnosis according to SCID-II (DSM-IV)<br>Exclusion: Psychotic and acute substance-related disorders, acute (uncontrollable) risk of suicide, or organic mental disorders; severe medical conditions (according to ICD-10) | Mean age, <i>years</i> ( <i>SD</i> ):<br>G1: 31 (9.4)<br>G2: 29 (8.7)<br>G3: 30 (9.1)<br>Female: 69%<br>Race/ethnicity: NR | Primary outcome: BPI, GSI of SCL-90-R at end of treatment (duration varies by treatment)<br>G2 and G3 significantly more effective than G1 for improving BPD outcomes (measured by BPI [G2 vs. G1: 18.76 vs. 26.39, <i>P</i> =0.004; G3 vs. G1: 19.41 vs. 26.39, <i>P</i> =0.0004]), depression (BDI [G2 vs. G1: 17.44 vs. 27.80, <i>P</i> =0.0001; G3 vs. G1: 15.20 vs. 27.80, <i>P</i> =0.0001]), and global functioning (GSI of SCL-90-R [G2 vs. G1: 0.99 vs. 1.65, <i>P</i> =0.0001; G3 vs. G1: 0.96 vs. 1.65, <i>P</i> =0.0001])<br>No significant differences between active arms (G2 and G3) and G1 for anxiety (BAI)<br>Incidence of AEs: NR<br>Withdrawal due to AEs: NR<br>Attrition: 18.0% (22/122)<br>Differential attrition: ≤10 percentage points | High         |

AE=adverse event; BAI=Beck Anxiety Inventory; BDI=Beck Depression Inventory; BPD=borderline personality disorder; BPI=Borderline Personality Inventory; DSM-IV=*Diagnostic and Statistical Manual of Mental Disorders*, 4th Edition; E-PDT=psychodynamic therapy by experts in personality disorder; G1=Group 1; G2=Group 2; G3=Group 3; GSI=Global Severity Index; ICD-10=*International Classification of Diseases*, 10th Revision; *N*=sample size; NR=not reported; PIT=psychoanalytic interactional therapy; RCT=randomized controlled trial; SCL-90-R=Symptom Checklist-90-Revised; SCID-II=Structured Clinical Interview for DSM-IV Axis II Disorders; SD=standard deviation; TAU=treatment as usual; WL=wait-list.

# Mechanism-Based Group Psychotherapy Versus Nonspecific Supportive Psychotherapy

**TABLE 7-1. Study characteristics and main results of mechanism-based group psychotherapy compared with nonspecific supportive psychotherapy**

| Author (year) and/or trial name | Study characteristics                                                                                               | Participants, <i>N</i> ; interventions; duration                                                                                                                                                                                                                                                                                                          | Study population, including main inclusion and exclusion criteria                                                                                                                                                                                                                          | Sample demographics                                                                                 | Primary outcome; main results; attrition                                                                                                                                                                                                                                                                                                                                                                                                     | Risk of bias |
|---------------------------------|---------------------------------------------------------------------------------------------------------------------|-----------------------------------------------------------------------------------------------------------------------------------------------------------------------------------------------------------------------------------------------------------------------------------------------------------------------------------------------------------|--------------------------------------------------------------------------------------------------------------------------------------------------------------------------------------------------------------------------------------------------------------------------------------------|-----------------------------------------------------------------------------------------------------|----------------------------------------------------------------------------------------------------------------------------------------------------------------------------------------------------------------------------------------------------------------------------------------------------------------------------------------------------------------------------------------------------------------------------------------------|--------------|
| Herpertz et al. (2020)          | Design: RCT<br>Setting: Outpatient, single center<br>Country: Germany<br>Funding: Other, German Research Foundation | <i>N</i> =59<br>G1 (29): Mechanism-based anti-aggression psychotherapy; highly manualized program starting with one individual 1-hour session followed by 6 weeks of group therapy with two 1.5-hour sessions per week (a total of 18 hours)<br>G2 (30): Nonspecific supportive psychotherapy similar to DBT with same dosage as G1<br>Duration: 6 months | Inclusion: Ages 18–55 years; outpatients meeting $\geq 4$ BPD criteria according to IPDE<br>Exclusion: Additional non-study psychotherapy; pregnancy; epilepsy; bipolar I disorder, schizophrenia, or current substance abuse or addiction as well as change in medication in past 3 weeks | Mean age, years ( <i>SD</i> ):<br>G1: 33 (8.8)<br>G2: 30 (9.5)<br>Female: 64%<br>Race/ethnicity: NR | Primary outcome: MOAS at 6 months<br>No difference between groups at end of treatment<br>G2 significantly greater improvement in overt aggression on the MOAS at 6 months (10.60 vs. 22.95, $P=0.02$ )<br>Incidence of AEs:<br>G1: 6.9% (2/29)<br>G2: 0% (0/30)<br>Withdrawal due to AE:<br>G1: 3.4% (1/29)<br>G2: 0% (0/30)<br>Attrition: 24%<br>Differential attrition:<br>$\geq 10$ percentage points<br>G1: 31% (9/29)<br>G2: 17% (5/30) | High         |

AE=adverse event; BPD=borderline personality disorder; DBT=dialectical behavior therapy; G1=Group 1; G2=Group 2; IPDE=International Personality Disorder Examination; MOAS=Modified Overt Aggression Scale; *N*=sample size; NR=not reported; RCT=randomized controlled trial; SD=standard deviation.

## Other Psychotherapy Versus Treatment as Usual

TABLE G-8. Study characteristics and main results of other psychotherapy compared with TAU

| Author (year) and/or trial name | Study characteristics                                                                             | Participants, <i>N</i> ; interventions; duration                                                                                                                                  | Study population, including main inclusion and exclusion criteria                                                                                                                                                                               | Sample demographics                                                          | Primary outcome; main results; attrition                                                                                                                                                                                                           | Risk of bias |
|---------------------------------|---------------------------------------------------------------------------------------------------|-----------------------------------------------------------------------------------------------------------------------------------------------------------------------------------|-------------------------------------------------------------------------------------------------------------------------------------------------------------------------------------------------------------------------------------------------|------------------------------------------------------------------------------|----------------------------------------------------------------------------------------------------------------------------------------------------------------------------------------------------------------------------------------------------|--------------|
| Amianto et al. (2011)           | Design: RCT<br>Setting: Outpatient, single center<br>Country: Italy<br>Funding: Government, other | <i>N</i> =35<br>G1 (17): TAU: Supervised team management<br>G2 (18): Supervised team management plus sequential brief Adlerian psychodynamic psychotherapy<br>Duration: 12 months | Inclusion: Ages 20–50 years; DSM-IV-TR BPD diagnosis; heavy use of MHS throughout prior year<br>Exclusion: Acute comorbid Axis I disorder requiring hospitalization; current SUD; intellectual disability; previous psychotherapy interventions | Mean age, years ( <i>SD</i> ): 40 (9.4)<br>Female: 49%<br>Race/ethnicity: NR | Primary outcome: High mental health use (more than six emergency interventions in prior year)<br>No significant differences between G2 and G1 in CGI, SCL-90, and GAF at 12 months<br>Attrition: 5.7% (2/35)<br>G1: 5.9% (1/17)<br>G2: 5.6% (1/18) | Moderate     |

**TABLE G-8. Study characteristics and main results of other psychotherapy compared with TAU (continued)**

| Author (year) and/or trial name | Study characteristics                                                                         | Participants, <i>N</i> ; interventions; duration                                                                                                                                                                                                                                           | Study population, including main inclusion and exclusion criteria                                                                                                                                                                                                                                                                                                            | Sample demographics                                                                                                                      | Primary outcome; main results; attrition                                                                                                                                                                                                                                                                                                                                                                                                                                                                                                                  | Risk of bias |
|---------------------------------|-----------------------------------------------------------------------------------------------|--------------------------------------------------------------------------------------------------------------------------------------------------------------------------------------------------------------------------------------------------------------------------------------------|------------------------------------------------------------------------------------------------------------------------------------------------------------------------------------------------------------------------------------------------------------------------------------------------------------------------------------------------------------------------------|------------------------------------------------------------------------------------------------------------------------------------------|-----------------------------------------------------------------------------------------------------------------------------------------------------------------------------------------------------------------------------------------------------------------------------------------------------------------------------------------------------------------------------------------------------------------------------------------------------------------------------------------------------------------------------------------------------------|--------------|
| Gratz et al. (2014)             | Design: RCT<br>Setting: Outpatient, single center<br>Country: NR<br>Funding: Government, NIMH | <i>N</i> =61<br>G1 (30): TAU; ongoing outpatient treatment, with most participants (>70%) receiving supportive or dynamic individual therapy and others (19%) receiving CBT<br>G2 (31): ERGT; Weekly 90-minute group sessions over 14 weeks (six patients per group)<br>Duration: 14 weeks | Inclusion: Females; age 18–60 years; threshold or subthreshold diagnosis of BPD; history of repeated deliberate self-harm, with one or more episodes in past 6 months; having an individual therapist, psychiatrist, or case manager; diagnostic interview for DSM-IV<br>Exclusion: Diagnoses of primary psychotic disorder, bipolar I disorder, or current (past month) SUD | Mean age, <i>years</i> ( <i>SD</i> ):<br>G1: 33 (0.9)<br>G2: 33 (11.0)<br>Female: 100%<br>Race/ethnicity:<br>Racial/ethnic minority: 21% | Primary outcome: NR<br>G2 significantly more effective than G1 for improving self-harm (measured using SHI; 16.05 vs. 29.40, <i>P</i> <0.05), emotion dysregulation (DERS; 95.27 vs. 113.62, <i>P</i> <0.05), BPD severity (ZAN-BPD; 4.35 vs. 12.03, <i>P</i> <0.05), and quality of life (QLI; 0.31 vs. -0.50, <i>P</i> <0.05)<br>No significant differences between G2 and G1 on measures of BPD-related severity and symptoms (measured by composite of IIP, BEST, AAQ, BDI, and SDS)<br>Attrition: 13.1% (8/61)<br>G1: 10% (3/30)<br>G2: 16.1% (5/31) | Moderate     |

**TABLE G–8. Study characteristics and main results of other psychotherapy compared with TAU (continued)**

| Author (year) and/or trial name | Study characteristics                                                                              | Participants, <i>N</i> ; interventions; duration                                                                                                                                                                                                                                                                                                                                          | Study population, including main inclusion and exclusion criteria                                                                                                                                                                                                                                                                                                                                                                                                                                             | Sample demographics                                                          | Primary outcome; main results; attrition                                                                                                                                                                                                                                                                                                                                                                                                                                                                                   | Risk of bias |
|---------------------------------|----------------------------------------------------------------------------------------------------|-------------------------------------------------------------------------------------------------------------------------------------------------------------------------------------------------------------------------------------------------------------------------------------------------------------------------------------------------------------------------------------------|---------------------------------------------------------------------------------------------------------------------------------------------------------------------------------------------------------------------------------------------------------------------------------------------------------------------------------------------------------------------------------------------------------------------------------------------------------------------------------------------------------------|------------------------------------------------------------------------------|----------------------------------------------------------------------------------------------------------------------------------------------------------------------------------------------------------------------------------------------------------------------------------------------------------------------------------------------------------------------------------------------------------------------------------------------------------------------------------------------------------------------------|--------------|
| Reneses et al. (2013)           | Design: RCT<br>Setting: Outpatient, multicenter<br>Country: Spain<br>Funding: Government, Ministry | <i>N</i> =53<br>G1 (28): TAU; conventional treatment without specific additional psychotherapy for 6 months, psychopharmacological treatment in accordance with standard applied in hospital clinic<br>G2 (25): PRFP along with conventional care: 20 face-to-face, 45-minute, consecutive weekly PRFP sessions plus conventional outpatient psychiatric treatment<br>Duration: 12 months | Inclusion: Ages 18–50 years; clinical diagnosis of BPD using DSM-IV-TR and SCID-II; clinical situation of outpatient treatment<br>Exclusion: Active suicide risk symptoms, violent or unmanageable hetero-aggressive behaviors; comorbidity with diagnosis of eating behavior disorder on Axis I, toxic dependence disorder, or current severe physical disease; interrupting patients' psychotherapy for more than four consecutive sessions without justification or for more than six sessions in any case | Mean age, years ( <i>SD</i> ): 34 (7.5)<br>Female: 71%<br>Race/ethnicity: NR | Primary outcome: Severity of general symptoms (GSI of SCL-90-R) and impulsivity (BIS, SASS)<br>G2 significantly more effective than G1 for improving BPD severity (measured by ZAN-BPD; 13.0 vs. 19.1, $P<0.001$ ) and symptoms (SCL-90 [1.2 vs. 1.7, $P<0.001$ ]; MADRS total [15.9 vs. 22.8, $P<0.001$ ]; BIS [52.5 vs. 68.2, $P<0.01$ ]; and SASS [35.4 vs. 27.6, $P<0.001$ ])<br>No significant differences between G2 and G1 for STAI state score or CGI<br>Attrition: 13% (7/53)<br>G1: 14% (4/28)<br>G2: 12% (3/25) | High         |



TABLE G-8. Study characteristics and main results of other psychotherapy compared with TAU (continued)

| Author (year) and/or trial name | Study characteristics                                                                  | Participants, <i>N</i> ; interventions; duration                                                                                                                                                                                                                                                                                                                                                                                                                                                                                                                                                                                             | Study population, including main inclusion and exclusion criteria                                                                                                                                                                                                                       | Sample demographics                                                                                                        | Primary outcome; main results; attrition                                                                                                                                                                                                                                                                                                                                                                                                                                                                                                                                                                                                                                                                                                                       | Risk of bias |
|---------------------------------|----------------------------------------------------------------------------------------|----------------------------------------------------------------------------------------------------------------------------------------------------------------------------------------------------------------------------------------------------------------------------------------------------------------------------------------------------------------------------------------------------------------------------------------------------------------------------------------------------------------------------------------------------------------------------------------------------------------------------------------------|-----------------------------------------------------------------------------------------------------------------------------------------------------------------------------------------------------------------------------------------------------------------------------------------|----------------------------------------------------------------------------------------------------------------------------|----------------------------------------------------------------------------------------------------------------------------------------------------------------------------------------------------------------------------------------------------------------------------------------------------------------------------------------------------------------------------------------------------------------------------------------------------------------------------------------------------------------------------------------------------------------------------------------------------------------------------------------------------------------------------------------------------------------------------------------------------------------|--------------|
| Leichsenring et al. (2016)      | Design: RCT<br>Setting: Inpatient, single center<br>Country: Germany<br>Funding: Other | <i>N</i> =168<br>G1 (46): WL/TAU; 80% of patients continued usual treatment and remainder did not receive any treatment during WL period<br>G2 (64): PIT; one or two weekly individual sessions and three weekly group therapy sessions; art or body therapy and consultations with a social worker (on needs basis)<br>G3 (58): E-PDT; one or two weekly sessions of non-manualized individual therapy and three weekly sessions of group therapy; art or body therapy and consultations with a social worker (on needs basis)<br>Mean duration, <i>days</i> ( <i>SD</i> ):<br>G1: 89.69 (105.31)<br>G2: 106.7 (41.71)<br>G3: 76.78 (21.07) | Inclusion: Ages 18–65 years; Cluster B personality disorder diagnosis according to SCID-II (DSM-IV)<br>Exclusion: Psychotic and acute substance-related disorders, acute (uncontrollable) risk of suicide, or organic mental disorders; severe medical conditions (according to ICD-10) | Mean age, <i>years</i> ( <i>SD</i> ):<br>G1: 31 (9.4)<br>G2: 29 (8.7)<br>G3: 30 (9.1)<br>Female: 69%<br>Race/ethnicity: NR | Primary outcome: BPI, GSI of SCL-90-R at end of treatment (duration varies by treatment)<br>G2 and G3 significantly more effective than G1 for improving BPD outcomes (measured by BPI [G2 vs. G1: 18.76 vs. 26.39, <i>P</i> =0.004; G3 vs. G1: 19.41 vs. 26.39, <i>P</i> =0.0004]), depression (BDI [G2 vs. G1: 17.44 vs. 27.80, <i>P</i> =0.0001; G3 vs. G1: 15.20 vs. 27.80, <i>P</i> =0.0001]) and global functioning (GSI of SCL-90-R [G2 vs. G1: 0.99 vs. 1.65, <i>P</i> =0.0001; G3 vs. G1: 0.96 vs. 1.65, <i>P</i> =0.0001])<br>No significant differences between active arms (G2 and G3) and G1 for anxiety (BAI)<br>Incidence of AEs: NR<br>Withdrawal due to AEs: NR<br>Attrition: 18.0% (22/122)<br>Differential attrition: ≤10 percentage points | High         |

AAQ=Acceptance and Action Questionnaire; AE=adverse event; BAI=Beck Anxiety Inventory; BDI=Beck Depression Inventory; BEST=Borderline Evaluation of Severity Over Time; BIS=Barrat Impulsivity Scale; BPD=borderline personality disorder; BPI=Borderline Personality Inventory; CBT=cognitive-behavioral therapy; CGI=Clinical Global Impression; DERS=Difficulties in Emotion Regulation Scale; DSM-IV=*Diagnostic and Statistical Manual of Mental Disorders*, 4th Edition; DSM-IV-TR=*Diagnostic and Statistical Manual of Mental Disorders*, 4th Edition, Text Revision; ERGT=emotion regulation group therapy; E-PDT=psychodynamic therapy by experts in personality disorders; G1=Group 1; G2=Group 2; G3=Group 3; GAF=Global Assessment of Functioning; GSI=Global Severity Index; ICD-10=*International Classification of Diseases*, 10th Revision; IIP=Inventory of Interpersonal Problems; MADRS=Montgomery-Åsberg Depression Rating Scale; MHS=mental health services; *N*=sample size; NIMH=National Institute of Mental Health; NR=not reported; PIT=psychoanalytic-interactional therapy; PRFP=psychic representation focused psychotherapy; QLI=Quality of Life Inventory; RCT=randomized controlled trial; SASS=Social Adaptation Self-evaluation Scale; SCID-II=Structured Clinical Interview for DSM-IV Axis II Disorders; SCL-90=Symptom Checklist-90; SCL-90-R=Symptom Checklist-90 Revised; SD=standard deviation; SDS=Sheehan Disability Scale; SHI=Self-Harm Inventory; STAI=State-Trait-Anxiety Inventory; SUD=substance use disorder; TAU=treatment as usual; WL=wait-list; ZAN-BPD=Zanarini Rating Scale for Borderline Personality Disorder.

## Service Delivery Approaches

TABLE G-9. Study characteristics and main results of service delivery approaches

| Author (year) and/or trial name | Study characteristics                                                                                                                        | Participants, <i>N</i> ; interventions; duration                                                                                                                                                                                                                                                                                        | Study population, including main inclusion and exclusion criteria                                                                                                                   | Sample demographics                                                                                                                | Primary outcome; main results; attrition                                                                                                                                                                 | Risk of bias |
|---------------------------------|----------------------------------------------------------------------------------------------------------------------------------------------|-----------------------------------------------------------------------------------------------------------------------------------------------------------------------------------------------------------------------------------------------------------------------------------------------------------------------------------------|-------------------------------------------------------------------------------------------------------------------------------------------------------------------------------------|------------------------------------------------------------------------------------------------------------------------------------|----------------------------------------------------------------------------------------------------------------------------------------------------------------------------------------------------------|--------------|
| Bartak et al. (2011)            | Design: Prospective cohort study<br>Setting: University hospital and mental health care centers<br>Country: The Netherlands<br>Funding: None | <i>N</i> =245<br>G1 (59): Outpatient individual or group psychotherapy sessions for up to two sessions per week<br>G2 (99): At least one session per week of psychotherapy in day-hospital but slept at home<br>G3 (87): Stayed at institution for 5 days per week and received different forms of psychotherapy<br>Duration: 18 months | Inclusion: Participants with Cluster B personality disorders diagnosed with DSM-IV Personality<br>Exclusion: Organic cerebral impairment, intellectual disability, or schizophrenia | Based on <i>N</i> analyzed:<br>Mean age, <i>years</i> ( <i>SD</i> ): 31 (8.5)<br>Female: 71%<br>Race/ethnicity: NR<br>77% with BPD | Primary outcome: GSI at 18 months<br>No significant differences in GSI and EQ-5D<br>Incidence of AEs: NR<br>Withdrawal due to AEs: NR<br>Attrition: 16%<br>Differential attrition: ≤10 percentage points | Moderate     |

**TABLE G-9. Study characteristics and main results of service delivery approaches (continued)**

| Author (year) and/or trial name | Study characteristics                                                                                            | Participants, <i>N</i> ; interventions; duration                                                                                                                                                                                                                                                        | Study population, including main inclusion and exclusion criteria                                                                                                                                                                                                | Sample demographics                                                                                         | Primary outcome; main results; attrition                                                                                                                                                                                                              | Risk of bias |
|---------------------------------|------------------------------------------------------------------------------------------------------------------|---------------------------------------------------------------------------------------------------------------------------------------------------------------------------------------------------------------------------------------------------------------------------------------------------------|------------------------------------------------------------------------------------------------------------------------------------------------------------------------------------------------------------------------------------------------------------------|-------------------------------------------------------------------------------------------------------------|-------------------------------------------------------------------------------------------------------------------------------------------------------------------------------------------------------------------------------------------------------|--------------|
| Laporte et al. (2018)           | Design: Prospective cohort<br>Setting: Outpatient, multicenter<br>Country: Canada<br>Funding: McGill University  | <i>N</i> =681<br>G1 (479): 12 weekly sessions of individual therapy and 12 of group therapy<br>G2 (138): Extended care clinic with weekly sessions of two types of group therapy, weekly sessions of individual therapy, and pharmacological management<br>Duration:<br>G1: 12 weeks<br>G2: 6–24 months | Inclusion: DSM-5 BPD diagnosis; ≥8 on DIB-R for current BPD<br>Exclusion: NR                                                                                                                                                                                     | Mean age, <i>years</i> ( <i>SD</i> ):<br>G1: 27 (7.8)<br>G2: 36 (10.4)<br>Female: 93%<br>Race/ethnicity: NR | Primary outcome: NR<br>Significant reductions in both groups but no reporting on between-group comparisons<br>Incidence of AEs: NR<br>Withdrawal due to AEs: NR<br>Attrition: 32%<br>Differential attrition:<br>G1: 29% (137/479)<br>G2: 43% (59/138) | High         |
| Sinnaeve et al. (2018)          | Design: RCT<br>Setting: Community mental health centers<br>Country: The Netherlands<br>Funding: GGZ Rivierduinen | <i>N</i> =84<br>G1 (42): Standard, outpatient DBT<br>G2 (42): Step-down DBT consisting of 3 months of residential DBT plus 6 months of outpatient DBT<br>Duration:<br>G1: 12 months<br>G2: 9 months                                                                                                     | Inclusion: DSM-IV BPD diagnosis; ages 18–45 years; ≥24 on the BPDSI-IV and one or more episodes of SIB<br>Exclusion: Chronic psychotic disorder, bipolar I disorder, intellectual disability, or SUD requiring detoxification; involuntary psychiatric treatment | Mean age, <i>years</i> ( <i>SD</i> ):<br>G1: 26 (7.5)<br>G2: 26 (6.2)<br>Female: 95%<br>Race/ethnicity: NR  | Primary outcome: NR<br>Significant reductions in both groups but no reporting on between-group comparisons<br>Incidence of AEs: NR<br>Withdrawal due to AEs: NR<br>Attrition: 44%<br>Differential attrition: ≤10 percentage points                    | High         |

**TABLE G-9. Study characteristics and main results of service delivery approaches (continued)**

| Author (year) and/or trial name | Study characteristics                                                                         | Participants, <i>N</i> ; interventions; duration                                                        | Study population, including main inclusion and exclusion criteria                                                                                                                             | Sample demographics                                                                                         | Primary outcome; main results; attrition                                                                                                                                                                                                                                                                                                                                                 | Risk of bias |
|---------------------------------|-----------------------------------------------------------------------------------------------|---------------------------------------------------------------------------------------------------------|-----------------------------------------------------------------------------------------------------------------------------------------------------------------------------------------------|-------------------------------------------------------------------------------------------------------------|------------------------------------------------------------------------------------------------------------------------------------------------------------------------------------------------------------------------------------------------------------------------------------------------------------------------------------------------------------------------------------------|--------------|
| Smits et al. (2020; 2022)       | Design: RCT<br>Setting: Outpatient, multicenter<br>Country: The Netherlands<br>Funding: ZonMw | <i>N</i> =114<br>G1 (70): MBT, day-hospital setting<br>G2 (44): MBT, IOP setting<br>Duration: 18 months | Inclusion: BPD diagnosis; age ≥18 years<br>Exclusion: ASD, chronic psychotic disorder, or organic brain disorder, intellectual disability (IQ <80), or ASPD with history of physical violence | Mean age, <i>years</i> ( <i>SD</i> ):<br>G1: 31 (10.6)<br>G2: 30 (9.2)<br>Female: 83%<br>Race/ethnicity: NR | Primary outcome: GSI of BSI at 18 months<br>Significant improvements on all outcomes (GSI, SSHI, PAI-BOR, EQ-5D, IIP, SIPP) at 18 months and no significant between-group difference except on IIP and SIPP<br>No significant differences between groups at 36 months<br>Incidence of AEs: NR<br>Withdrawal due to AEs: NR<br>Attrition: 78% at 18 months<br>Differential attrition: 18% | High         |

AE=adverse event; ASD=autism spectrum disorder; ASPD=antisocial personality disorder; BPD=borderline personality disorder; BPDSI-IV=Borderline Personality Disorder Severity Index-IV; BSI=Brief Symptom Inventory; DBT=dialectical behavior therapy; DIB-R=Diagnostic Interview for Borderlines-Revised; DSM-IV=*Diagnostic and Statistical Manual of Mental Disorders*, 4th Edition; DSM-5=*Diagnostic and Statistical Manual of Mental Disorders*, 5th Edition; EQ-5D=European Quality of Life-5 Dimension; G1=Group 1; G2=Group 2; G3=Group 3; GSI=Global Severity Index; IIP=Inventory of Interpersonal Problems; IOP=intensive outpatient; IQ=intelligence quotient; MBT=mentalization-based treatment; *N*=sample size; NR=not reported; PAI-BOR=Personality Assessment Inventory-Borderline Features Scale; RCT=randomized controlled trial; SD=standard deviation; SIB=self-injurious behavior; SIPP=Severity Indices of Personality Problems; SSHI=Suicide and Self-Harm Inventory; SUD=substance use disorder.



## APPENDIX H

# Assessments

**TABLE H-1. Summary of outcome measures for borderline personality disorder<sup>1</sup>**

| Measure | Full name                   | Description                                                                                                                                                                                                                                                                                                                                                               | Minimally important difference |
|---------|-----------------------------|---------------------------------------------------------------------------------------------------------------------------------------------------------------------------------------------------------------------------------------------------------------------------------------------------------------------------------------------------------------------------|--------------------------------|
| ALS     | Affective Lability Scale    | <p>Items: 54-item self-report measure of lability of anger</p> <p>Scale: 0–3 (greater affective lability)</p> <p>Scoring: Patients rate different features of mood instability on a 4-point Likert scale from 0 (very uncharacteristic) to 3 (very characteristic); total score is mean of all item responses divided by number of responses</p>                          | NR                             |
| BIS-11  | Barratt Impulsiveness Scale | <p>Items: 30-item self-report questionnaire designed to measure impulsivity; items describe common impulsive or nonimpulsive behaviors and preferences</p> <p>Scale: 30–120 (greater impulsivity)</p> <p>Scoring: Each item rated on 4-point Likert scale from 1 (rarely/never) to 4 (almost always/always); overall score is calculated from the sum of the 30 items</p> | NR                             |
| BAI     | Beck Anxiety Inventory      | <p>Items: 21-item self-report measure of anxiety items</p> <p>Scale: 0 (low anxiety) to 63 (score of <math>\geq 36</math> = potentially concerning levels of anxiety)</p> <p>Scoring: Each item rated on 4-point Likert scale from 0 (not at all bothered) to 3 (severely bothered); total score calculated by finding the sum of the 21 items</p>                        | NR                             |
| BDI     | Beck Depression Inventory   | <p>Items: 21-item self-report inventory that measures characteristic attitudes and symptoms of depression</p> <p>Scale: 0–63 (minimal to severe depression)</p> <p>Scoring: Each item rated on 4-point Likert scale from 0 (mild) to 3 (severe); total score calculated by finding the sum of the 21 items</p>                                                            | 5                              |
| BHS     | Beck Hopelessness Scale     | <p>Items: 20-item checklist that assesses negative attitudes about the future</p> <p>Scale: 0–20 (score <math>\geq 9</math> associated with 11-times higher suicide rate than score <math>\leq 8</math>)</p> <p>Scoring: Each item rated true or false; total score calculated by finding the sum of endorsed pessimistic statements and denied optimistic statements</p> | NR                             |

**TABLE H-1. Summary of outcome measures for borderline personality disorder<sup>1</sup> (continued)**

| <b>Measure</b> | <b>Full name</b>                               | <b>Description</b>                                                                                                                                                                                                                                                                                                                                                                                                                                           | <b>Minimally important difference</b> |
|----------------|------------------------------------------------|--------------------------------------------------------------------------------------------------------------------------------------------------------------------------------------------------------------------------------------------------------------------------------------------------------------------------------------------------------------------------------------------------------------------------------------------------------------|---------------------------------------|
| BSS            | Beck Scale for Suicide Ideation                | Items: 21-item self-report instrument evaluating current intensity of suicidality in past week<br><br>Scale: 0–38<br><br>Scoring: Each item consists of three options graded according to suicidal intensity on 3-point scale ranging from 0 to 2; ratings for first 19 items summed to yield total score                                                                                                                                                    | NR                                    |
| BEST           | Borderline Evaluation of Severity Over Time    | Items: 15-item self-report questionnaire designed to assess change in severity of BPD during prior month<br><br>Scale: 12 (best) to 72 (worst)<br><br>Scoring: Each item rated on 5-point Likert scale from 1 (none/never) to 5 (extreme/almost always); items divided among three subscales (A, B, C); total score calculated by adding together the scores of subscales A and B, then subtracting total from subscale C and adding correction factor of 15 | NR                                    |
| BPDSI          | Borderline Personality Disorder Severity Index | Items: 70-item semistructured clinical interview measure assessing frequency and severity of BPD-related symptoms among nine symptom areas corresponding to DSM-IV criteria<br><br>Scale: 0–90 (scores >15 signify BPD pathology)<br><br>Scoring: Each item rated on 11-point scale from 0 (never) to 10 (daily); for each DSM criterion an average score is derived (range = 0–10), with the sum of these nine scores providing the total score             | NR                                    |
| BSL-23         | Borderline Symptom List-23                     | Items: 23-item self-report scale to assess borderline typical symptomatology<br><br>Scale: 0 (none or low) to 4 (extremely high)<br><br>Scoring: Each item rated on 5-point Likert scale from 0 (not at all) to 4 (very strong); total score calculated as the sum of item response ratings divided by total number of responses                                                                                                                             | NR                                    |
| BSI            | Brief Symptom Inventory                        | Items: 53-item self-report scale derived from SCL-90-R to identify clinically relevant psychological symptoms<br><br>Scale: NR<br><br>Scoring: Each item rated on 5-point Likert scale from 0 (not at all) to 4 (extremely); GSI calculated using sums for the nine symptom dimensions plus four additional items and dividing by total number of item responses, providing the mean score                                                                   | NR                                    |
| CGI-I          | Clinical Global Impression-Improvement         | Items: 1-item clinician-rated instrument to conduct global assessment of illness improvement<br><br>Scale: 1–7<br><br>Scoring: Clinician rates patient’s mental illness on a scale from 1 (very much improved) to 7 (very much worse)                                                                                                                                                                                                                        | NR                                    |

**TABLE H-1. Summary of outcome measures for borderline personality disorder<sup>1</sup> (continued)**

| Measure | Full name                                  | Description                                                                                                                                                                                                                                                                                                                                                                                                                                                                                          | Minimally important difference |
|---------|--------------------------------------------|------------------------------------------------------------------------------------------------------------------------------------------------------------------------------------------------------------------------------------------------------------------------------------------------------------------------------------------------------------------------------------------------------------------------------------------------------------------------------------------------------|--------------------------------|
| CGI-S   | Clinical Global Impression–Severity        | <p>Items: 1 item clinician-rated instrument to conduct global assessment of illness severity</p> <p>Scale: 0–7</p> <p>Scoring: Clinician rates patient’s mental illness on 7-point scale: 1 (normal, not at all ill), 2 (borderline mentally ill), 3 (mildly ill), 4 (moderately ill), 5 (markedly ill), 6 (severely ill), 7 (among the most extremely ill patients); score should reflect average severity level across past 7 days</p>                                                             | NR                             |
| CUXOS   | Clinically Useful Anxiety Outcome Scale    | <p>Items: 20-item self-report measure designed to assess severity of anxiety symptoms in adults with diagnosed anxiety disorder or depression</p> <p>Scale: 0–80 (&lt;10 nonanxious; 11–20 minimal anxiety; 21–30 mild anxiety; 31–40 moderate anxiety; 41+ severe anxiety)</p> <p>Scoring: There are two subscales, psychic anxiety and somatic anxiety; each item rated on 5-point Likert scale from 0 (not at all) to 4 (almost always); total score is the sum of all items</p>                  | NR                             |
| CUDOS   | Clinically Useful Depression Outcome Scale | <p>Items: 18-item self-report scale to identify depression symptoms and impact</p> <p>Scale: 0–72 (nondepressed 0–10; minimal depression 11–20; mild depression 21–30; moderate depression 31–45; and severe depression ≥46)</p> <p>Scoring: Each item rated on 5-point Likert scale from 0 (not at all) to 4 (almost always); total score is the sum of all items</p>                                                                                                                               | NR                             |
| DSHI    | Deliberate Self-Harm Inventory             | <p>Items: 17-item self-report measure that assesses method, frequency, and medical severity of deliberate self-harm without suicidal intent</p> <p>Scale: 0–17</p> <p>Scoring: Each item answered yes or no; total score is the sum of yes answers</p>                                                                                                                                                                                                                                               | NR                             |
| DASS    | Depression, Anxiety, Stress Scale          | <p>Items: 42-item self-report questionnaire that measures depression, anxiety, and stress</p> <p>Scale: 0–126 (suggested cutoffs for normal, mild, moderate, severe, and extremely severe for depression are 9, 13, 20, 27, and 42, respectively; for anxiety 7, 9, 14, 19, 42, and for stress 14, 18, 25, 33, 42)</p> <p>Scoring: Each item rated on 4-point Likert scale ranging from 0 to 3 for how often item has been experienced in past week; total score calculated by summing all items</p> | NR                             |
| DERS    | Difficulties in Emotion Regulation Scale   | <p>Items: 36-item self-report measure of six facets of emotion regulation</p> <p>Scale: 36–180 (higher scores indicate greater degree of emotion dysregulation)</p> <p>Scoring: Each item rated on 5-point Likert scale from 1 (almost never) to 5 (almost always); total score calculated by summing all items</p>                                                                                                                                                                                  | NR                             |



**TABLE H-1. Summary of outcome measures for borderline personality disorder<sup>1</sup> (continued)**

| <b>Measure</b> | <b>Full name</b>                     | <b>Description</b>                                                                                                                                                                                                                                                                                                                                                                                                                                                                                                                                     | <b>Minimally important difference</b> |
|----------------|--------------------------------------|--------------------------------------------------------------------------------------------------------------------------------------------------------------------------------------------------------------------------------------------------------------------------------------------------------------------------------------------------------------------------------------------------------------------------------------------------------------------------------------------------------------------------------------------------------|---------------------------------------|
| DES            | Dissociative Experiences Scale       | <p>Items: 28-item self-report scale to measure various types of dissociation</p> <p>Scale: 0–100 (higher scores indicate greater likelihood of dissociative disorder; suggested cutoff score 45)</p> <p>Scoring: Each item rated from 0% of time experiencing item to 100% of time, increasing by 10% increments; mean score used as total</p>                                                                                                                                                                                                         | NR                                    |
| EQ-5D          | European Quality of Life–5 Dimension | <p>Items: 5-item instrument to measure health-related quality of life in Europe</p> <p>Scale: 0 (worst) to 100 (best)</p> <p>Scoring: Each item rated at one of three response levels: slight problems, moderate problems, extreme problems</p>                                                                                                                                                                                                                                                                                                        | NR                                    |
| GAF            | Global Assessment of Functioning     | <p>Items: 100-item clinician-rated instrument indicating overall psychosocial functioning during specified period on continuum from psychological sickness to health</p> <p>Scale: 0–100 (severely impaired to extremely high functioning)</p> <p>Scoring: Rating can be based on many things, including interview or questionnaire; medical records; information from medical providers, caregivers, or relatives; or police or court records about violent or illegal behavior; summary score reflects level of individual’s overall functioning</p> | NR                                    |
| GAS            | Global Assessment Scale              | <p>Items: 1-item clinician-rated instrument evaluating overall functioning during specified period on continuum from psychological sickness to health</p> <p>Scale: 1 (hypothetically sickest) to 100 (hypothetically healthiest); scale divided into 10 equal intervals</p> <p>Scoring: In making a rating, lowest interval that describes subject’s functioning during the preceding week is selected; information needed to make rating can come from patient, reliable informant, or case record</p>                                               | NR                                    |
| Ham-A          | Hamilton Rating Scale for Anxiety    | <p>Items: 14-item questionnaire to assess patients’ anxiety</p> <p>Scale: 0–56 (mild severity, &lt;17, mild to moderate severity 18–24, severe &gt;25)</p> <p>Scoring: Each item rated on 5-point Likert scale from 0 (not present) to 4 (most severe); sum of the score indicates severity of anxiety</p>                                                                                                                                                                                                                                             | NR                                    |
| Ham-D          | Hamilton Rating Scale for Depression | <p>Items: ≥17-item questionnaire used to assess patients’ depression</p> <p>Scale: 0–53 (0–7 considered normal; &gt;20 considered moderate severity)</p> <p>Scoring: Each item rated on 3- or 5-point Likert scale from 0 to 2 or 0 to 4; sum of the score indicates severity of depression</p>                                                                                                                                                                                                                                                        | NR                                    |

**TABLE H-1. Summary of outcome measures for borderline personality disorder<sup>1</sup> (continued)**

| <b>Measure</b> | <b>Full name</b>                               | <b>Description</b>                                                                                                                                                                                                                                                                                                                                                                                                                                                                                                                                                            | <b>Minimally important difference</b> |
|----------------|------------------------------------------------|-------------------------------------------------------------------------------------------------------------------------------------------------------------------------------------------------------------------------------------------------------------------------------------------------------------------------------------------------------------------------------------------------------------------------------------------------------------------------------------------------------------------------------------------------------------------------------|---------------------------------------|
| IIP            | Inventory of Interpersonal Problems            | <p>Items: 64-item self-report measure of interpersonal distress</p> <p>Scale: 0–64 (higher scores indicate more interpersonal distress)</p> <p>Scoring: Each item rated on 5-point Likert scale from 0 (not at all) to 4 (extremely) on how much difficulty /distress it causes participants; items grouped into eight subscales</p>                                                                                                                                                                                                                                          | NR                                    |
| LSASI          | Lifetime Suicide Attempt Self-Injury Interview | <p>Items: 20-item clinician-administered structured, face-to-face interview for assessing information regarding participant’s first, most recent, and most severe episodes of self-injury</p> <p>Scale: Assessors code suicide and self-injury behaviors according to method, lethality, intent to die, and level of medical treatment received</p>                                                                                                                                                                                                                           | NR                                    |
| MOAS           | Modified Overt Aggression Scale                | <p>Items: 20-item clinician-administered, semistructured interview designed to assess various manifestations of aggressive behavior in outpatients</p> <p>Scale: 0–100 (no symptoms to severe)</p> <p>Scoring: Four subcomponent types of aggression are scored between 0 (no aggression) and 4, with potential cumulative score of 10 for each subcomponent, with each weighted differently; total score calculated by multiplying the sum score of each subcomponent by the weight for that category, then summing weighted scores</p>                                      | NR                                    |
| MADRS          | Montgomery-Åsberg Depression Rating Scale      | <p>Items: 10-item clinician-rated measure of severity of 10 depressive symptoms</p> <p>Scale: 0–60 (0–6 defined as symptom absent; &gt;34 defined as severe depression)</p> <p>Scoring: Each item rated on a scale from 0 to 6, with 6 as most severe description of symptom; total score is the sum of scores for each item</p>                                                                                                                                                                                                                                              | NR                                    |
| PAI            | Personality Assessment Inventory               | <p>Items: 344-item self-report instrument of 22 nonoverlapping scales to assess personality and psychopathology</p> <p>Scale: T scores (from <math>\leq 30</math> to <math>\geq 110</math>) are provided for validity, clinical, interpersonal, and treatment amenability scales and subscales on the basis of a census matched standardization sample of 1,000 normal adults. Coefficients of fit are also available that compare scores with profiles of known clinical groups.</p> <p>Scoring: Each item rated from 0 (false) to 4 (very true) on 4-point Likert scale</p> | NR                                    |
| QoL            | Quality of Life Index                          | <p>Items: 10-item self-report instrument measuring 10 dimensions of health-related quality of life</p> <p>Scale: 0–100</p> <p>Scoring: Each item rated from 1 (poor) to 10 (excellent), total score summed total from each item</p>                                                                                                                                                                                                                                                                                                                                           | NR                                    |

**TABLE H-1. Summary of outcome measures for borderline personality disorder<sup>1</sup> (continued)**

| <b>Measure</b> | <b>Full name</b>                          | <b>Description</b>                                                                                                                                                                                                                                                                                                                                                                                                                             | <b>Minimally important difference</b> |
|----------------|-------------------------------------------|------------------------------------------------------------------------------------------------------------------------------------------------------------------------------------------------------------------------------------------------------------------------------------------------------------------------------------------------------------------------------------------------------------------------------------------------|---------------------------------------|
| SHI            | Self-Harm Inventory                       | Items: 22-item self-report instrument that explores respondents' histories of self-harm<br><br>Scale: 0–22<br><br>Scoring: Each item answered yes or no, total score summed by counting number of endorsed self-harm behaviors                                                                                                                                                                                                                 | NR                                    |
| SDS            | Sheehan Disability Scale                  | Items: 5-item self-rated instrument used to measure effect of individual's symptoms on three areas<br><br>Scale: 0–30 (no symptoms to severe)<br><br>Scoring: Each of three areas scored according to how much it was disrupted by symptoms (0 not at all to 10 very severely)                                                                                                                                                                 | NR                                    |
| SFQ            | Social Functioning Questionnaire          | Items: 8-item self-report scale to assess perceived social function<br><br>Scale: 0–24 (score >10 indicates poor social functioning)<br><br>Scoring: Each item scored on 4-point scale from 0 (no/never) to 3 (severely/always); total score is the sum of all items                                                                                                                                                                           | NR                                    |
| STAXI          | State-Trait Anger Expression Inventory    | Items: 44-item self-report scale that assesses anger expression (which consists of anger control, anger suppression, and externally directed anger) as well as anger as a state and a trait<br><br>Scale: Total score for each scale and subscale is based on the sum of individual item scores<br><br>Scoring: Each item rated on 4-point scale for frequency of exhibiting behavior (almost always, often, sometimes, almost never)          | NR                                    |
| STAXI-II       | State-Trait Anger Expression Inventory–II | Items: 57-item self-report questionnaire that assesses anger as well as anger as a state and a trait; updated version of STAXI<br><br>Scale: T scores (from less than or equal to 20 to greater than or equal to 80) and percentiles are provided and categorized by gender for each scale and subscale.<br><br>Scoring: Each item rated on 4-point scale for frequency of exhibiting behavior (almost always, often, sometimes, almost never) | NR                                    |
| SBQ            | Suicidal Behaviors Questionnaire          | Items: 4-item self-reported measure of suicidal thoughts and behaviors<br><br>Scale: 5–19<br><br>Scoring: Each item rated on a Likert scale from 1 to 3, 5, or 6; total score is the sum of all items                                                                                                                                                                                                                                          | NR                                    |
| SASII          | Suicide Attempt Self-Injury Interview     | Items: 40-item semistructured interview measures frequency, intent, and medical severity of suicide attempts and NSSI acts<br><br>Scale: NSSI, ambivalent suicide attempt, nonambivalent suicide attempt, failed suicide<br><br>Scoring: Assessors use six screening items, nine open-ended questions, and scores from six scales to categorize episodes                                                                                       | NR                                    |

**TABLE H-1. Summary of outcome measures for borderline personality disorder<sup>1</sup> (continued)**

| Measure  | Full name                                                 | Description                                                                                                                                                                                                                                                                                                                                                                                                                                                                                     | Minimally important difference |
|----------|-----------------------------------------------------------|-------------------------------------------------------------------------------------------------------------------------------------------------------------------------------------------------------------------------------------------------------------------------------------------------------------------------------------------------------------------------------------------------------------------------------------------------------------------------------------------------|--------------------------------|
| SRS      | Suicide Risk Scale                                        | Items: 26-item scale to measure risk of suicide<br>Scale: 0–26<br>Scoring: Each item is answered yes or no; number of positive responses can be summed for total score                                                                                                                                                                                                                                                                                                                          | NR                             |
| SCL-90-R | Symptom Checklist-90-Revised                              | Items: 90-item self-report screening measure of general psychiatric symptomatology along nine symptom constructs<br>Scale: 0–4<br>Scoring: Each item scored on 5-point Likert scale from 0 (not at all bothered) to 4 (extremely bothered); GSI can be calculated as average score of the 90 items in questionnaire                                                                                                                                                                             | NR                             |
| WHOQOL   | World Health Organization Quality of Life Scale           | Items: 100-item self-report questionnaire assessing quality of life through six domains<br>Scale: 0–100 (higher scores denote higher quality of life)<br>Scoring: Each item rated on 5-point Likert scale from 1 (not at all) to 5 (extremely); scale has 24 facets divided unequally among six domains, each domain has a unique method of calculating mean score; domain and facet scores can be transformed to 100-point scale using this formula:<br>TRANSFORMED SCORE = (SCORE–4)×(100/16) | NR                             |
| ZAN–BPD  | Zanarini Rating Scale for Borderline Personality Disorder | Items: Nine-item semistructured interview<br>Scale: 0–36 (no symptoms to severe)<br>Scoring: Each item rated on 5-point Likert scale from 0 (no symptoms) to 4 (severe symptoms) on each of nine items corresponding to the nine DSM-IV criteria for BPD; total score is the sum of all items                                                                                                                                                                                                   | NR                             |

BPD=borderline personality disorder; DSM-IV=*Diagnostic and Statistical Manual of Mental Disorders*, 4th Edition; GSI=Global Severity Index; NR=not reported; NSSI=nonsuicidal self-injury; SCL-90R=Symptom Checklist-90-Revised.

<sup>1</sup>Additional rating scales that can be used in adolescents include the Beck Depression Inventory for Youth, the Borderline Personality Features Scale for Children, the Children’s Global Assessment of Functioning Scale, the Millon Adolescent Clinical Inventory, the Youth Quality of Life Research Version, and the Youth Self-Report Scale (Jørgensen et al. 2021).



## APPENDIX I

# Excluded Studies

## List of Exclusion Codes:

- X1: Ineligible population
- X2: Ineligible intervention
- X3: Ineligible comparator
- X4: Ineligible outcome
- X5: Ineligible timing
- X6: Ineligible study design
- X7: Duplicate or superseded by paper publication
- X8: Non-English full text
- X9: Ineligible country
- X10: Not primary research

1. Antonsen BT, Kvarstein EH, Urnes Ø, et al: Favourable outcome of long-term combined psychotherapy for patients with borderline personality disorder: six-year follow-up of a randomized study. *Psychother Res* 27(1):51–63, 2017 DOI: 10.1080/10503307.2015.1072283 26261865 **Exclusion Code: X1.**
2. Arnevik E, Wilberg T, Urnes O, et al: Psychotherapy for personality disorders: short-term day hospital psychotherapy versus outpatient individual therapy: a randomized controlled study. *Eur Psychiatry* 24(2):71–78, 2009 DOI: 10.1016/j.eurpsy.2008.09.004 19097870 **Exclusion Code: X1.**
3. Artusio E: Acceptance and commitment therapy for individuals with emotion regulation problems: a pilot study. ProQuest Information and Learning, 2021 **Exclusion Code: X6.**
4. Bales DL, Verheul R, Hutsebaut J: Barriers and facilitators to the implementation of mentalization-based treatment (MBT) for borderline personality disorder. *Personal Ment Health* 11(2):118–131, 2017 DOI: 10.1002/pmh.1368 28488379 **Exclusion Code: X4.**
5. Barnicot K, Crawford M: Conclusions and questions from a non-randomised comparison of routine clinical services implementing different treatment models for borderline personality disorder. *Psychol Med* 49(16):2812–2814, 2019 DOI: 10.1017/s0033291719002447 31551098 **Exclusion Code: X6.**
6. Bateman A, Fonagy P: Impact of clinical severity on outcomes of mentalisation-based treatment for borderline personality disorder. *Br J Psychiatry* 203(3):221–227, 2013 DOI: 10.1192/bjp.bp.112.121129 23887998 **Exclusion Code: X6.**
7. Bateman A, O'Connell J, Lorenzini N, et al: A randomised controlled trial of mentalization-based treatment versus structured clinical management for patients with comorbid borderline personality disorder and antisocial personality disorder. *BMC Psychiatry* 16(1):304, 2016 DOI: 10.1186/s12888-016-1000-9 27577562 **Exclusion Code: X6.**
8. Beck E, Bo S, Jørgensen MS, et al: Mentalization-based treatment in groups for adolescents with borderline personality disorder: a randomized controlled trial. *J Child Psychol Psychiatry* 61(5):594–604, 2020 DOI: 10.1111/jcpp.13152 31702058 **Exclusion Code: X7.**
9. Bellino S, Bozzatello P, Rocca G, et al: Efficacy of omega-3 fatty acids in the treatment of borderline personality disorder: a study of the association with valproic acid. *J Psychopharmacol* 28(2):125–132, 2014 DOI: 10.1177/0269881113510072 24196948 **Exclusion Code: X2.**
10. Bernard L, Walburg V: Efficacy of a brief cognitive-emotional group intervention for patients with borderline personality disorder. *Psychologie Francaise* 65(3):185–196, 2020 DOI: 10.1016/j.psfr.2019.11.001 **Exclusion Code: X6.**

11. Berthoud L, Pascual-Leone A, Caspar F, et al: Leaving distress behind: a randomized controlled study on change in emotional processing in borderline personality disorder. *Psychiatry* 80(2):139–154, 2017 DOI: 10.1080/00332747.2016.1220230 28767333 **Exclusion Code: X6.**
12. Boritz T, Barnhart R, McMain SF: The influence of posttraumatic stress disorder on treatment outcomes of patients with borderline personality disorder. *J Pers Disord* 30(3):395–407, 2016 DOI: 10.1521/pedi\_2015\_29\_207 26305394 **Exclusion Code: X6.**
13. Bozzatello P, Rocca P, Bellino S: Combination of omega-3 fatty acids and valproic acid in treatment of borderline personality disorder: a follow-up study. *Clin Drug Investig* 38(4):367–372, 2018 DOI: 10.1007/s40261-017-0617-x 29302857 **Exclusion Code: X2.**
14. Buchheim A, Hörz-Sagstetter S, Doering S, et al: Change of unresolved attachment in borderline personality disorder: RCT study of transference-focused psychotherapy. *Psychother Psychosom* 86(5):314–316, 2017 DOI: 10.1159/000460257 28903103 **Exclusion Code: X6.**
15. Chapman AL, Rosenthal MZ, Dixon-Gordon KL, et al: Borderline personality disorder and the effects of instructed emotional avoidance or acceptance in daily life. *J Pers Disord* 31(4):483–502, 2017 DOI: 10.1521/pedi\_2016\_30\_264 27617652 **Exclusion Code: X6.**
16. Coyle TN, Shaver JA, Linehan MM: On the potential for iatrogenic effects of psychiatric crisis services: the example of dialectical behavior therapy for adult women with borderline personality disorder. *J Consult Clin Psychol* 86(2):116–124, 2018 DOI: 10.1037/ccp0000275 29369662 **Exclusion Code: X6.**
17. Davidson KM, Tyrer P, Norrie J, et al: Cognitive therapy v. usual treatment for borderline personality disorder: prospective 6-year follow-up. *Br J Psychiatry* 197(6):456–462, 2010 DOI: 10.1192/bjp.bp.109.074286 21119151 **Exclusion Code: X6.**
18. Edell MA, Raaff V, Dimaggio G, et al: Exploring the effectiveness of combined mentalization-based group therapy and dialectical behaviour therapy for inpatients with borderline personality disorder: a pilot study. *Br J Clin Psychol* 56(1):1–15, 2017 DOI: 10.1111/bjc.12123 27897326 **Exclusion Code: X2.**
19. Einy S, Narimani M, Atadokht A, et al: Effectiveness of mentalization based therapy and cognitive-analytical therapy on improved object relationship of people with borderline personality disorder: a comparison. *Payesh (Health Monitor)* 17(3):98–110, 2018 **Exclusion Code: X8.**
20. Euler S, Stalujanis E, Allenbach G, et al: Dialectical behavior therapy skills training affects defense mechanisms in borderline personality disorder: an integrative approach of mechanisms in psychotherapy. *Psychother Res* 29(8):1074–1085, 2019 DOI: 10.1080/10503307.2018.1497214 30005584 **Exclusion Code: X4.**
21. Farrell JM, Shaw IA, Webber MA: Corrigendum to “A schema-focused approach to group psychotherapy for outpatients with borderline personality disorder: a randomized controlled trial” [*J. Behav. Ther. Exp. Psychiatr.* 40 (2) (June 2009) 317–328]. *J Behav Ther Exp Psychiatry* 60:111, 2018 DOI: 10.1016/j.jbtep.2018.04.001 29680679 **Exclusion Code: X7.**
22. Flynn D, Kells M, Joyce M, et al: Dialectical behaviour therapy for treating adults and adolescents with emotional and behavioural dysregulation: study protocol of a coordinated implementation in a publicly funded health service. *BMC Psychiatry* 18(1):51, 2018 DOI: 10.1186/s12888-018-1627-9 29482538 **Exclusion Code: X10.**
23. Gleeson JF, Chanan A, Cotton SM, et al: Treating co-occurring first-episode psychosis and borderline personality: a pilot randomized controlled trial. *Early Interv Psychiatry* 6(1):21–29, 2012 DOI: 10.1111/j.1751-7893.2011.00306.x 22379625 **Exclusion Code: X2.**
24. Gray AS, Townsend ML, Bourke ME, et al: Effectiveness of a brief parenting intervention for people with borderline personality disorder: a 12-month follow-up study of clinician implementation in practice. *Adv Ment Health* 17(1):33–43, 2019 DOI: 10.1080/18387357.2018.1464887 **Exclusion Code: X1.**
25. Griffiths H, Duffy F, Duffy L, et al: Efficacy of mentalization-based group therapy for adolescents: the results of a pilot randomised controlled trial. *BMC Psychiatry* 19(1):167, 2019 DOI: 10.1186/s12888-019-2158-8 31170947 **Exclusion Code: X1.**
26. Harned MS, Gallop RJ, Valenstein-Mah HR: What changes when? The course of improvement during a stage-based treatment for suicidal and self-injuring women with borderline personality disorder and PTSD. *Psychother Res* 28(5):761–775, 2018 DOI: 10.1080/10503307.2016.1252865 27808001 **Exclusion Code: X6.**
27. Heerebrand SL, Bray J, Ulbrich C, et al: Effectiveness of dialectical behavior therapy skills training group for adults with borderline personality disorder. *J Clin Psychol* 77(7):1573–1590, 2021 DOI: 10.1002/jclp.23134 33821506 **Exclusion Code: X6.**
28. Hollander E, Swann AC, Coccaro EF, et al: Impact of trait impulsivity and state aggression on divalproex versus placebo response in borderline personality disorder. *Am J Psychiatry* 162(3):621–624, 2005 DOI: 10.1176/appi.ajp.162.3.621 15741486 **Exclusion Code: X6.**
29. Jariani M, Saaki M, Nazari H, Birjandi M: The effect of olanzapine and sertraline on personality disorder in patients with methadone maintenance therapy. *Psychiatr Danub* 22(4):544–547, 2010 21169896 **Exclusion Code: X9.**

30. Jørgensen CR, Bøye R, Andersen D, et al: Eighteen months post-treatment naturalistic follow-up study of mentalization-based therapy and supportive group treatment of borderline personality disorder: clinical outcomes and functioning. *Nord Psychol* 66(4):254–273, 2014 **Exclusion Code: X6.**
31. Juul S, Simonsen S, Poulsen S, et al: Detailed statistical analysis plan for the short-term versus long-term mentalisation-based therapy for outpatients with subthreshold or diagnosed borderline personality disorder randomised clinical trial (MBT-RCT). *Trials* 22(1):497, 2021 DOI: 10.1186/s13063-021-05450-y 34321051 **Exclusion Code: X6.**
32. Keefe JR, Kim TT, DeRubeis RJ, et al: Treatment selection in borderline personality disorder between dialectical behavior therapy and psychodynamic psychiatric management. *Psychol Med* 51(11):1829–1837, 2021 DOI: 10.1017/s0033291720000550 32204742 **Exclusion Code: X6.**
33. Keller S, Stelmaszczyk K, Kolly S, et al: Change in biased thinking in a treatment based on the motive-oriented therapeutic relationship for borderline personality disorder. *J Pers Disord* 32(Suppl):75–92, 2018 DOI: 10.1521/pedi.2018.32.suppl.75 29388899 **Exclusion Code: X6.**
34. Kellett S, Gausden J, Gaskell C: The effectiveness of cognitive analytic therapy for borderline personality disorder: utilizing a withdrawal experimental design to improve sensitivity to abandonment. *Psychol Psychother* 94(Suppl 1):96–119, 2021 DOI: 10.1111/papt.12278 32396677 **Exclusion Code: X6.**
35. Keng SL, Tan JX: Effects of brief mindful breathing and loving-kindness meditation on shame and social problem solving abilities among individuals with high borderline personality traits. *Behav Res Ther* 97:43–51, 2017 DOI: 10.1016/j.brat.2017.07.004 28710927 **Exclusion Code: X1.**
36. Keng SL, Tan HH: Effects of brief mindfulness and loving-kindness meditation inductions on emotional and behavioral responses to social rejection among individuals with high borderline personality traits. *Behav Res Ther* 100:44–53, 2018 DOI: 10.1016/j.brat.2017.11.005 29179024 **Exclusion Code: X10.**
37. Keng SL, Lee CSL, Eisenlohr-Moul TA: Effects of brief daily mindfulness practice on affective outcomes and correlates in a high BPD trait sample. *Psychiatry Res* 280:112485, 2019 DOI: 10.1016/j.psychres.2019.112485 31408773 **Exclusion Code: X6.**
38. Khalid-Khan S, Segal SC, Jopling EN, et al: Effectiveness of a modified dialectical behaviour therapy for adolescents within a stepped-care model. *Int J Adolesc Med Health* 30(2):1–7, 2016 27394042 **Exclusion Code: X6.**
39. Klein JP, Hauer-von Mauschwitz A, Berger T, et al: Effectiveness and safety of the adjunctive use of an internet-based self-management intervention for borderline personality disorder in addition to care as usual: results from a randomised controlled trial. *BMJ Open* 11(9):e047771, 2021 DOI: 10.1136/bmjopen-2020-047771 34497078 **Exclusion Code: X2.**
40. Knoblich N, Gundel F, Brückmann C, et al: DNA methylation of APBA3 and MCF2 in borderline personality disorder: potential biomarkers for response to psychotherapy. *Eur Neuropsychopharmacol* 28(2):252–263, 2018 DOI: 10.1016/j.euroneuro.2017.12.010 29274998 **Exclusion Code: X4.**
41. Kramer U, Pascual-Leone A, Berthoud L, et al: Assertive anger mediates effects of dialectical behaviour-informed skills training for borderline personality disorder: a randomized controlled trial. *Clin Psychol Psychother* 23(3):189–202, 2016 DOI: 10.1002/cpp.1956 25864773 **Exclusion Code: X4.**
42. Krantz LH, McMains S, Kuo JR: The unique contribution of acceptance without judgment in predicting non-suicidal self-injury after 20-weeks of dialectical behaviour therapy group skills training. *Behav Res Ther* 104:44–50, 2018 DOI: 10.1016/j.brat.2018.02.006 29529508 **Exclusion Code: X6.**
43. Krause-Utz A, Walther JC, Schweizer S, et al: Effectiveness of an emotional working memory training in borderline personality disorder: a proof-of-principle study. *Psychother Psychosom* 89(2):122–124, 2020 DOI: 10.1159/000504454 31901902 **Exclusion Code: X2.**
44. Krawitz R, Miga EM: Cost-effectiveness of dialectical behaviour therapy for borderline personality disorder, in *The Oxford Handbook of Dialectical Behaviour Therapy*. Edited by Swales MA. New York, Oxford University Press, 2019, pp 497–513 **Exclusion Code: X6.**
45. Kvarstein EH, Pedersen G, Folmo E, et al: Mentalization-based treatment or psychodynamic treatment programmes for patients with borderline personality disorder: the impact of clinical severity. *Psychol Psychother* 92(1):91–111, 2019 DOI: 10.1111/papt.12179 29582581 **Exclusion Code: X7.**
46. Lin TJ, Ko HC, Wu JY, et al: The effectiveness of dialectical behavior therapy skills training group vs. cognitive therapy group on reducing depression and suicide attempts for borderline personality disorder in Taiwan. *Arch Suicide Res* 23(1):82–99, 2019 DOI: 10.1080/13811118.2018.1436104 29528807 **Exclusion Code: X1.**
47. Linehan MM, Schmidt H 3rd, Dimeff LA, et al: Dialectical behavior therapy for patients with borderline personality disorder and drug-dependence. *Am J Addict* 8(4):279–292, 1999 DOI: 10.1080/105504999305686 10598211 **Exclusion Code: X1.**
48. Marziali E, Munroe-Blum H, McCleary L: The contribution of group cohesion and group alliance to the outcome of group psychotherapy. *Int J Group Psychother* 47(4):475–497, 1997 DOI: 10.1080/00207284.1997.11490846 9314699 **Exclusion Code: X6.**



49. McMain SF, Fitzpatrick S, Boritz T, et al: Outcome trajectories and prognostic factors for suicide and self-harm behaviors in patients with borderline personality disorder following one year of outpatient psychotherapy. *J Pers Disord* 32(4):497–512, 2018 DOI: 10.1521/pedi\_2017\_31\_309 28910214 **Exclusion Code: X6.**
50. Mehlum L, Tørmoen AJ, Ramberg M, et al: Dialectical behavior therapy for adolescents with repeated suicidal and self-harming behavior: a randomized trial. *J Am Acad Child Adolesc Psychiatry* 53(10):1082–1091, 2014 DOI: 10.1016/j.jaac.2014.07.003 25245352 **Exclusion Code: X1.**
51. Mendo-Cullell M, Arenas-Piñan L, Forné C, et al: A pilot study of the efficacy of an adventure therapy programme on borderline personality disorder: a pragmatic controlled clinical trial. *Personal Ment Health* 15(3):159–172, 2021 DOI: 10.1002/pmh.1505 33569869 **Exclusion Code: X2.**
52. Molavi P, Aziziaran S, Basharpour S, et al: Repeated transcranial direct current stimulation of dorsolateral-prefrontal cortex improves executive functions, cognitive reappraisal emotion regulation, and control over emotional processing in borderline personality disorder: a randomized, sham-controlled, parallel-group study. *J Affect Disord* 274:93–102, 2020 DOI: 10.1016/j.jad.2020.05.007 32469838 **Exclusion Code: X5.**
53. Morey LC, Lowmaster SE, Hopwood CJ: A pilot study of manual-assisted cognitive therapy with a therapeutic assessment augmentation for borderline personality disorder. *Psychiatry Res* 178(3):531–535, 2010 DOI: 10.1016/j.psychres.2010.04.055 20537722 **Exclusion Code: X2.**
54. Munroe-Blum H, Marziali E: A controlled trial of short-term group treatment for borderline personality disorder. *J Pers Disord* 9(3):190–198, 1995 **Exclusion Code: X1.**
55. Neacsiu AD, Rizvi SL, Linehan MM: Dialectical behavior therapy skills use as a mediator and outcome of treatment for borderline personality disorder. *Behav Res Ther* 48(9):832–839, 2010 DOI: 10.1016/j.brat.2010.05.017 20579633 **Exclusion Code: X4.**
56. Neacsiu AD, Lungu A, Harned MS, et al: Impact of dialectical behavior therapy versus community treatment by experts on emotional experience, expression, and acceptance in borderline personality disorder. *Behav Res Ther* 53:47–54, 2014 DOI: 10.1016/j.brat.2013.12.004 24418652 **Exclusion Code: X4.**
57. Norrie J, Davidson K, Tata P, et al: Influence of therapist competence and quantity of cognitive behavioural therapy on suicidal behaviour and inpatient hospitalisation in a randomised controlled trial in borderline personality disorder: further analyses of treatment effects in the BOScot study. *Psychol Psychother* 86(3):280–293, 2013 DOI: 10.1111/papt.12004 23420622 **Exclusion Code: X6.**
58. O'Dwyer N, Rickwood D, Buckmaster D, et al: Therapeutic interventions in Australian primary care, youth mental health settings for young people with borderline personality disorder or borderline traits. *Borderline Personal Disord Emot Dysregul* 7:23, 2020 DOI: 10.1186/s40479-020-00138-2 33042549 **Exclusion Code: X6.**
59. Pahwa M, Nuñez NA, Joseph B, et al: Efficacy and tolerability of lamotrigine in borderline personality disorder: a systematic review and meta-analysis. *Psychopharmacol Bull* 50(4):118–136, 2020 33012875 **Exclusion Code: X6.**
60. Paret C, Niedtfeld I, Lotter T, et al: Single-dose effects of citalopram on neural responses to affective stimuli in borderline personality disorder: a randomized clinical trial. *Biol Psychiatry Cogn Neurosci Neuroimaging* 6(8):837–845, 2021 DOI: 10.1016/j.bpsc.2021.02.002 33607327 **Exclusion Code: X5.**
61. Priebe S, Bhatti N, Barnicot K, et al: Effectiveness and cost-effectiveness of dialectical behaviour therapy for self-harming patients with personality disorder: a pragmatic randomised controlled trial. *Psychother Psychosom* 81(6):356–365, 2012 DOI: 10.1159/000338897 22964561 **Exclusion Code: X1.**
62. Ramseyer F, Ebert A, Roser P, et al: Exploring nonverbal synchrony in borderline personality disorder: a double-blind placebo-controlled study using oxytocin. *Br J Clin Psychol* 59(2):186–207, 2020 DOI: 10.1111/bjc.12240 31774581 **Exclusion Code: X1.**
63. Rathus JH, Miller AL: Dialectical behavior therapy adapted for suicidal adolescents. *Suicide Life Threat Behav* 32(2):146–157, 2002 DOI: 10.1521/suli.32.2.146.24399 12079031 **Exclusion Code: X1.**
64. Reyes-López J, Ricardo-Garcell J, Armas-Castañeda G, et al: Clinical improvement in patients with borderline personality disorder after treatment with repetitive transcranial magnetic stimulation: preliminary results. *Br J Psychiatry* 40(1):97–104, 2018 DOI: 10.1590/1516-4446-2016-2112 28614492 **Exclusion Code: X9.**
65. Reyes-Ortega MA, Miranda EM, Fresán A, et al: Clinical efficacy of a combined acceptance and commitment therapy, dialectical behavioural therapy, and functional analytic psychotherapy intervention in patients with borderline personality disorder. *Psychol Psychother* 93(3):474–489, 2020 DOI: 10.1111/papt.12240 31246370 **Exclusion Code: X9.**
66. Ridolfi ME, Rossi R, Occhialini G, et al: A clinical trial of a psychoeducation group intervention for patients with borderline personality disorder. *J Clin Psychiatry* 81(1):19m12753, 2019 DOI: 10.4088/JCP.19m12753 31917907 **Exclusion Code: X5.**
67. Ridolfi ME, Rossi R, Occhialini G, et al: A randomized controlled study of a psychoeducation group intervention for patients with borderline personality disorder. *J Clin Psychiatry* 81(1):19m12753, 2020 **Exclusion Code: X5.**

68. Rinne T, van den Brink W, Wouters L, et al: SSRI treatment of borderline personality disorder: a randomized, placebo-controlled clinical trial for female patients with borderline personality disorder. *Am J Psychiatry* 159(12):2048–2054, 2002 DOI: 10.1176/appi.ajp.159.12.2048 12450955 **Exclusion Code: X2.**
69. Rohde C, Polcwiartek C, Correll CU, et al: Real-world effectiveness of clozapine for borderline personality disorder: results from a 2-year mirror-image study. *J Pers Disord* 32(6):823–837, 2018 DOI: 10.1521/pedi\_2017\_31\_328 29120277 **Exclusion Code: X6.**
70. Rossouw TI, Fonagy P: Mentalization-based treatment for self-harm in adolescents: a randomized controlled trial. *J Am Acad Child Adolesc Psychiatry* 51(12):1304–1313.e3, 2012 DOI: 10.1016/j.jaac.2012.09.018 23200287 **Exclusion Code: X1.**
71. Ryberg W, Diep LM, Landrø NI, et al: Effects of the Collaborative Assessment and Management of Suicidality (CAMS) model: a secondary analysis of moderation and influencing factors. *Arch Suicide Res* 24(4):589–608, 2020 DOI: 10.1080/13811118.2019.1650143 31442105 **Exclusion Code: X10.**
72. Sahin Z, Vinnars B, Gorman BS, et al: Clinical severity as a moderator of outcome in psychodynamic and dialectical behavior therapies for borderline personality disorder. *Personal Disord* 9(5):437–446, 2018 DOI: 10.1037/per0000276 29239627 **Exclusion Code: X6.**
73. Salamin V, Kratzel A, Gothuey I, et al: Compliant patients with borderline personality disorder non-responsive to one-year dialectical behavior therapy: outcomes of a second year. *J Behav Cogn Ther* 31(2):115–124, 2021 DOI: 10.1016/j.jbct.2021.01.001 **Exclusion Code: X3.**
74. Santamarina Perez P, Romero Cela S, Mendez Blanco I, et al: Efficacy of dialectical behavior therapy compared to supportive therapy in adolescents with suicidal behavior. *Eur Neuropsychopharmacol* 27:S853–S4, 2017 **Exclusion Code: X1.**
75. Schilling L, Moritz S, Kriston L, et al: Efficacy of metacognitive training for patients with borderline personality disorder: preliminary results. *Psychiatry Res* 262:459–464, 2018 DOI: 10.1016/j.psychres.2017.09.024 28927866 **Exclusion Code: X2.**
76. Shafti SS, Shahveisi B: Olanzapine versus haloperidol in the management of borderline personality disorder: a randomized double-blind trial. *J Clin Psychopharmacol* 30(1):44–47, 2010 DOI: 10.1097/JCP.0b013e3181c826ff 20075647 **Exclusion Code: X9.**
77. Signer S, Estermann Jansen R, Sachse R, et al: Social interaction patterns, therapist responsiveness, and outcome in treatments for borderline personality disorder. *Psychol Psychother* 93(4):705–722, 2020 DOI: 10.1111/papt.12254 31583805 **Exclusion Code: X6.**
78. Sinyor M, Williams M, Mitchell R, et al: Cognitive behavioral therapy for suicide prevention in youth admitted to hospital following an episode of self-harm: a pilot randomized controlled trial. *J Affect Disord* 266:686–694, 2020 DOI: 10.1016/j.jad.2020.01.178 32056945 **Exclusion Code: X1.**
79. Smith EG: An opportunity to report closer-to-efficacy findings in a study of lamotrigine for borderline personality disorder. *Am J Psychiatry* 175(12):1265, 2018 DOI: 10.1176/appi.ajp.2018.18080991 30501419 **Exclusion Code: X6.**
80. Snoek A, Beekman ATF, Dekker J, et al: A randomized controlled trial comparing the clinical efficacy and cost-effectiveness of eye movement desensitization and reprocessing (EMDR) and integrated EMDR-dialectical behavioural therapy (DBT) in the treatment of patients with post-traumatic stress disorder and comorbid (sub)clinical borderline personality disorder: study design. *BMC Psychiatry* 20(1):396, 2020 DOI: 10.1186/s12888-020-02713-x 32762677 **Exclusion Code: X6.**
81. Soler J, Elices M, Pascual JC, et al: Effects of mindfulness training on different components of impulsivity in borderline personality disorder: results from a pilot randomized study. *Borderline Personal Disord Emot Dysregul* 3:1, 2016 DOI: 10.1186/s40479-015-0035-8 26759718 **Exclusion Code: X6.**
82. St-Amour S, Cailhol L, Ruocco AC, et al: Could physical exercise be an effective treatment for adults with borderline personality disorder? *Psychiatry Res* 295:113625, 2021 DOI: 10.1016/j.psychres.2020.113625 33302133 **Exclusion Code: X2.**
83. Thompson-Brenner H, Shingleton RM, Thompson DR, et al: Focused vs. broad enhanced cognitive behavioral therapy for bulimia nervosa with comorbid borderline personality: a randomized controlled trial. *Int J Eat Disord* 49(1):36–49, 2016 DOI: 10.1002/eat.22468 26649812 **Exclusion Code: X1.**
84. Tong K, Costello S, McCabe E, et al: Mentalization-based treatment in a naturalistic setting in Ireland: a cohort study. *Psychiatr Serv* 73(1):46–52, 2022 DOI: 10.1176/appi.ps.202000810 34106745 **Exclusion Code: X4**
85. Turner RM: Naturalistic evaluation of dialectical behavior therapy-oriented treatment for borderline personality disorder. *Cogn Behav Pract* 7(4):413–419, 2000 **Exclusion Code: X2.**
86. Vita A, Deste G, Barlati S, et al: Feasibility and effectiveness of cognitive remediation in the treatment of borderline personality disorder. *Neuropsychol Rehabil* 28(3):416–428, 2018 DOI: 10.1080/09602011.2016.1148054 26872501 **Exclusion Code: X2.**
87. Waltz J, Dimeff LA, Koerner K, et al: Feasibility of using video to teach a dialectical behavior therapy skill to clients with borderline personality disorder. *Cogn Behav Pract* 16(2):214–222, 2009 DOI: 10.1016/j.cbpra.2008.08.004 **Exclusion Code: X4.**

88. Wolkenstein L, Rombold-Bruehl F, Bingmann T, et al: Challenging control over emotions in borderline personality disorder - a tDCS study. *Neuropsychologia* 156:107850, 2021 DOI: 10.1016/j.neuropsychologia.2021.107850 33812945 **Exclusion Code: X4.**
89. Wong MT, Tye C: Low hospital inpatient readmission rate in patients with borderline personality disorder: a naturalistic study at Southern Health, Victoria, Australia. *Aust N Z J Psychiatry* 39(7):607–611, 2005 DOI: 10.1080/j.1440-1614.2005.01633.x 15996142 **Exclusion Code: X4.**
90. Zanarini MC, Schulz SC, Detke H, et al: Open-label treatment with olanzapine for patients with borderline personality disorder. *J Clin Psychopharmacol* 32(3):398–402, 2012 DOI: 10.1097/JCP.0b013e3182524293 22544004 **Exclusion Code: X3.**
91. Zeifman RJ, Boritz T, Barnhart R, et al: The independent roles of mindfulness and distress tolerance in treatment outcomes in dialectical behavior therapy skills training. *Personal Disord* 11(3):181–190, 2020 DOI: 10.1037/per0000368 31647267 **Exclusion Code: X6.**
92. Ziegenhorn AA, Roepke S, Schommer NC, et al: Clonidine improves hyperarousal in borderline personality disorder with or without comorbid posttraumatic stress disorder: a randomized, double-blind, placebo-controlled trial. *J Clin Psychopharmacol* 29(2):170–173, 2009 DOI: 10.1097/JCP.0b013e31819a4bae 19512980 **Exclusion Code: X2.**

ISBN 978-0-89042-709-5

90000

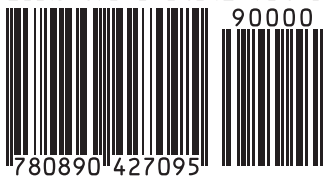

9 780890 427095

AMERICAN  
PSYCHIATRIC  
ASSOCIATION  

---

PUBLISHING  
WWW.APPI.ORG

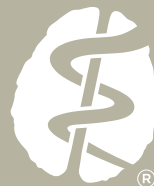

Supplement: appendices.pdf [file appendices.pdf]
